# Supplementary material for: Studies on Isoniazid Derivatives through a Medicinal Chemistry Approach for the Identification of New Inhibitors of Urease and Inflammatory Markers
Source: PubMed Central journal article supplement (PMC6494997; doi:10.1038/s41598-019-43082-0), 2019-05-01
Supplement: 41598_2019_43082_MOESM1_ESM.pdf [file 41598_2019_43082_MOESM1_ESM.pdf]

# Studies on Isoniazid Derivatives through a Medicinal Chemistry Approach for the Identification of New Inhibitors of Urease and Inflammatory Markers

Fazila Rizvi<sup>1</sup>, Majid Khan<sup>1</sup>, Almas Jabeen<sup>2</sup>, Hina Siddiqui<sup>1\*</sup>, and M. Iqbal Choudhary<sup>1, 2, 3\*</sup>

<sup>1</sup>H.E.J. Research Institute of Chemistry, International Center for Chemical and Biological Sciences,  
University of Karachi, Karachi-75270, Pakistan

<sup>2</sup>Dr. Panjwani Center for Molecular Medicine and Drug Research,  
International Center for Chemical and Biological Sciences, University of Karachi, Karachi-75270, Pakistan

<sup>3</sup>Department of Biochemistry, Faculty of Science, King Abdulaziz University, Jeddah-21452, Saudi Arabia

## Key Words:

Isoniazid, Urease Inhibitors, Anti-Inflammatory agents

### \* Correspondence:

M. Iqbal Choudhary

[hej@cyber.net.pk](mailto:hej@cyber.net.pk)

Hina Siddiqui

[hinahej@gmail.com](mailto:hinahej@gmail.com)

Bushra / Dr. Hina / Fz-I-ISO-20  
1H

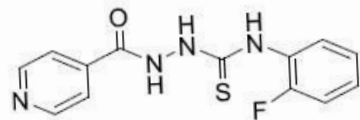

Compound 3

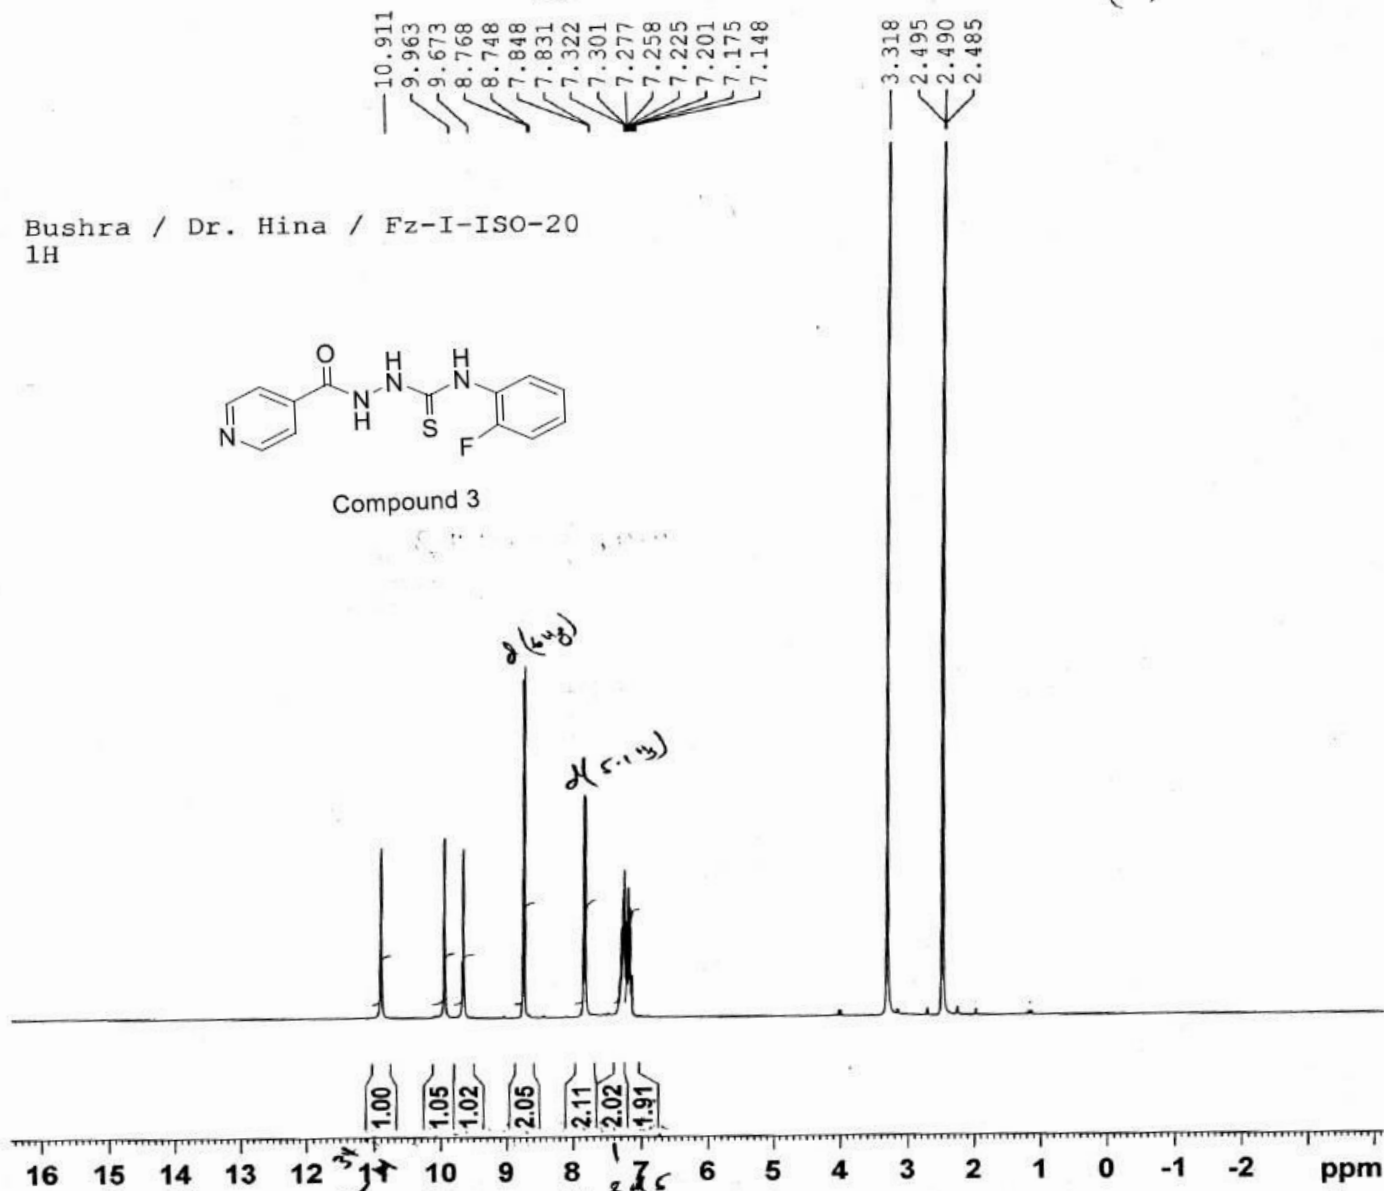

AVANCE AV - III  
300 MHz, LAB # 116

|         |                |
|---------|----------------|
| NAME    | Oct04-16       |
| EXPNO   | 3              |
| PROCNO  | 1              |
| Date_   | 20161004       |
| Time_   | 10.36          |
| INSTRUM | Spect          |
| PROBHD  | 5 mm BBO BB-1H |
| PULPROG | zg30           |
| TD      | 32768          |
| SOLVENT | DMSO           |
| NS      | 32             |
| DS      | 0              |
| SWH     | 6188.119 Hz    |
| FIDRES  | 0.188846 Hz    |
| AQ      | 2.6477044 sec  |
| RG      | 203            |
| DW      | 80.800 usec    |
| DE      | 6.50 usec      |
| TE      | 300.0 K        |
| D1      | 2.00000000 sec |
| TDO     | 1              |

|                        |                 |
|------------------------|-----------------|
| ===== CHANNEL f1 ===== |                 |
| NUC1                   | 1H              |
| P1                     | 12.50 usec      |
| PL1                    | 0.00 dB         |
| PL1W                   | 13.16228485 W   |
| SFO1                   | 300.1318534 MHz |
| SI                     | 32768           |
| SF                     | 300.1300040 MHz |
| WDW                    | EM              |
| SSB                    | 0               |
| LB                     | 0.30 Hz         |
| GB                     | 0               |
| PC                     | 1.00            |

Bushra / Dr. Hina / Fz-I-ISO-20  
1H

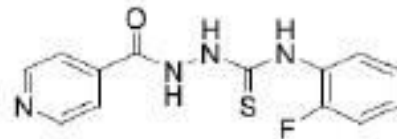

Compound 3

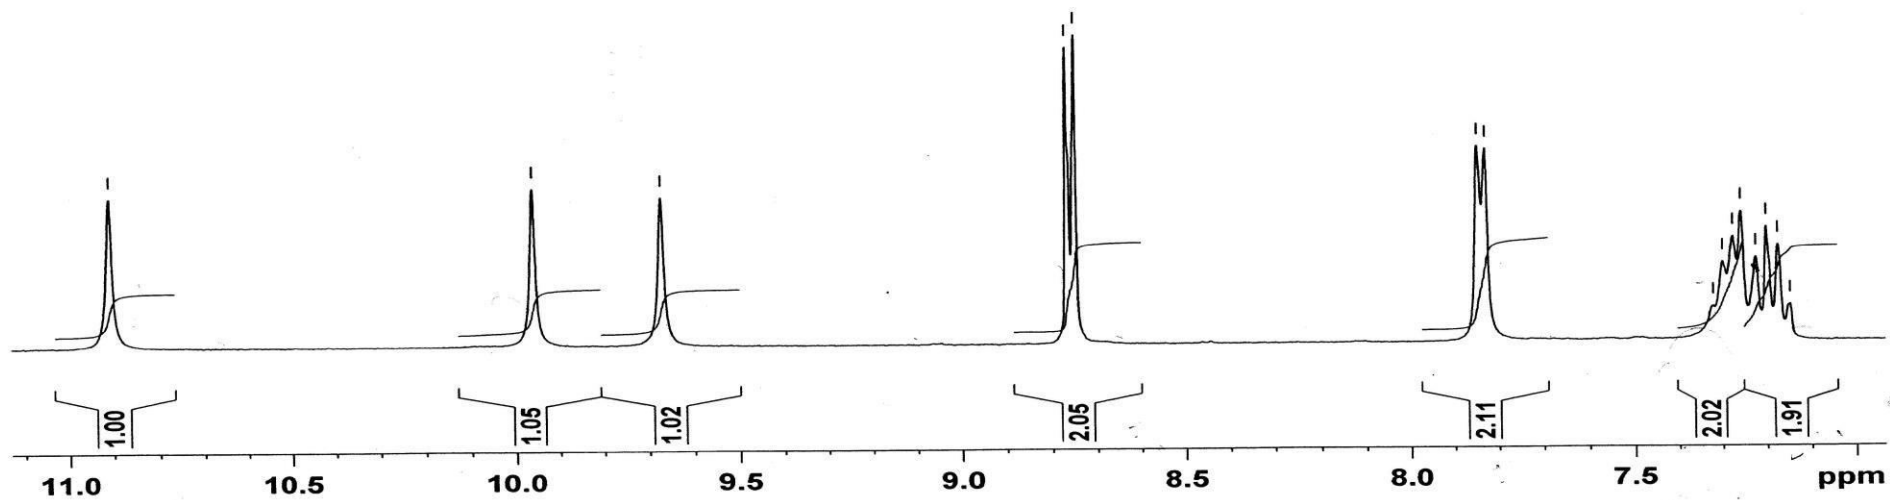

10.911

9.963

9.673

8.768  
8.748

7.848  
7.831

7.322  
7.301  
7.277  
7.258  
7.225  
7.201  
7.175  
7.148

File: FZ-I-ISO20  
Sample: BUSHRA QAMAR /DR. HINA  
Instrument: JEOL-600H-2  
Inlet: Direct Probe

Date Run: 10-05-2016 (Time Run: 09:59:13)

Ionization mode: FAB+

Scan: 3

R.T.: .18

Base: m/z 182; 20.7%FS TIC: 986634

#Ions: 99

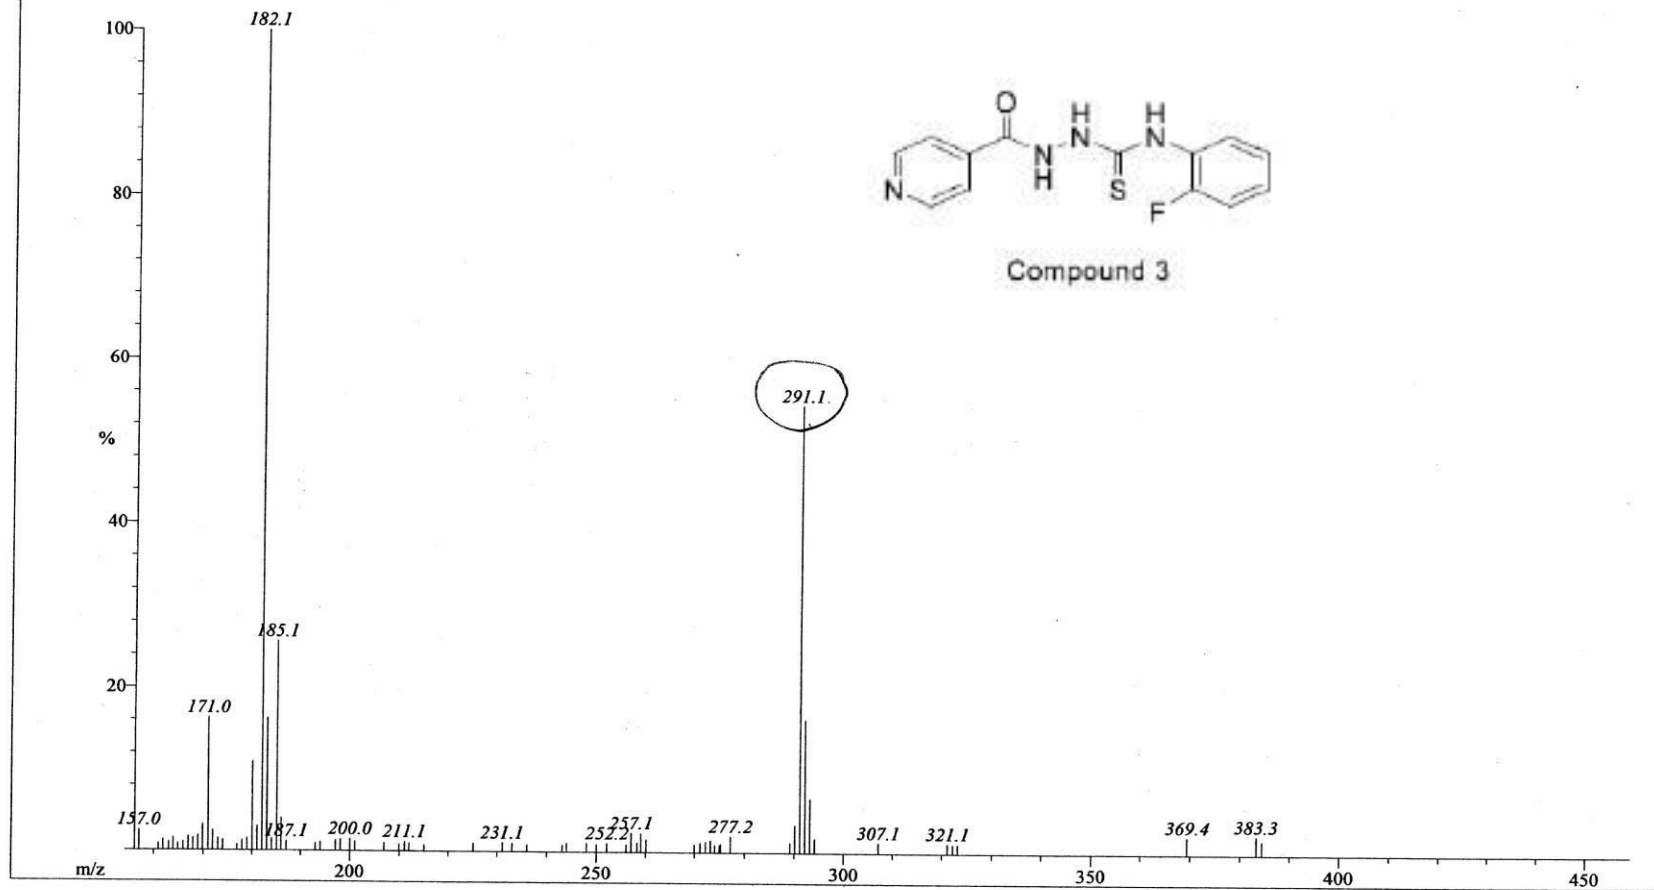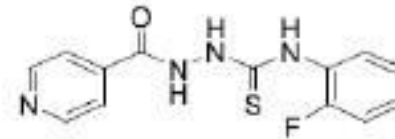

Compound 3

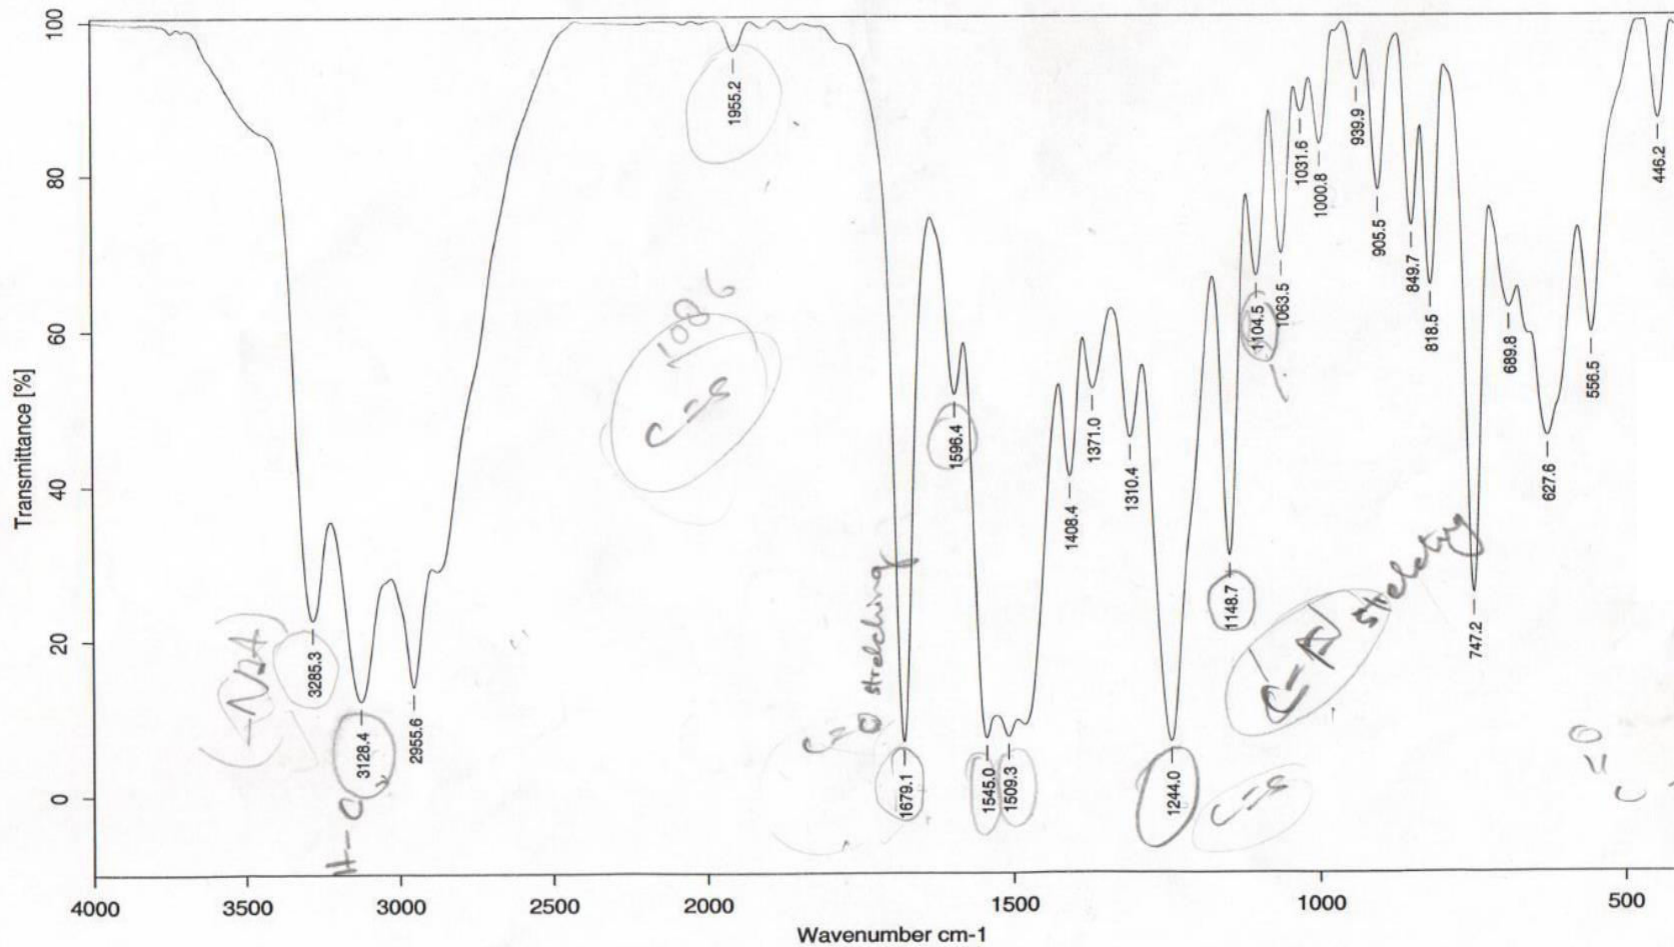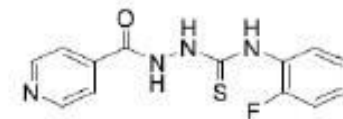

Compound 3

Sample : Fz-I-Iso20/Fazila Rizvi/Dr. Hina

Spectrum : Fz-I-Iso20.0 (in D:\IRSTUDENT)

Measured : 29/12/2016 on VECTOR22

Technic : Solid

Resolution : 4 cm-1 ( 10 scans )

Analyst : M. Asif

BUSHRA/DR, HINA/FZ-I-ISO-26/  
ICCBS, U.O.K/

AVANCE 400  
LAB NO 117

— 10.928  
— 10.024  
— 9.821  
8.769  
8.755  
7.847  
7.839  
7.563  
7.542  
7.386  
7.367  
7.347

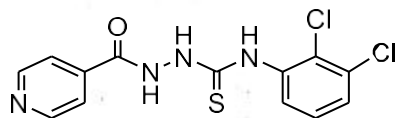

Compound 4

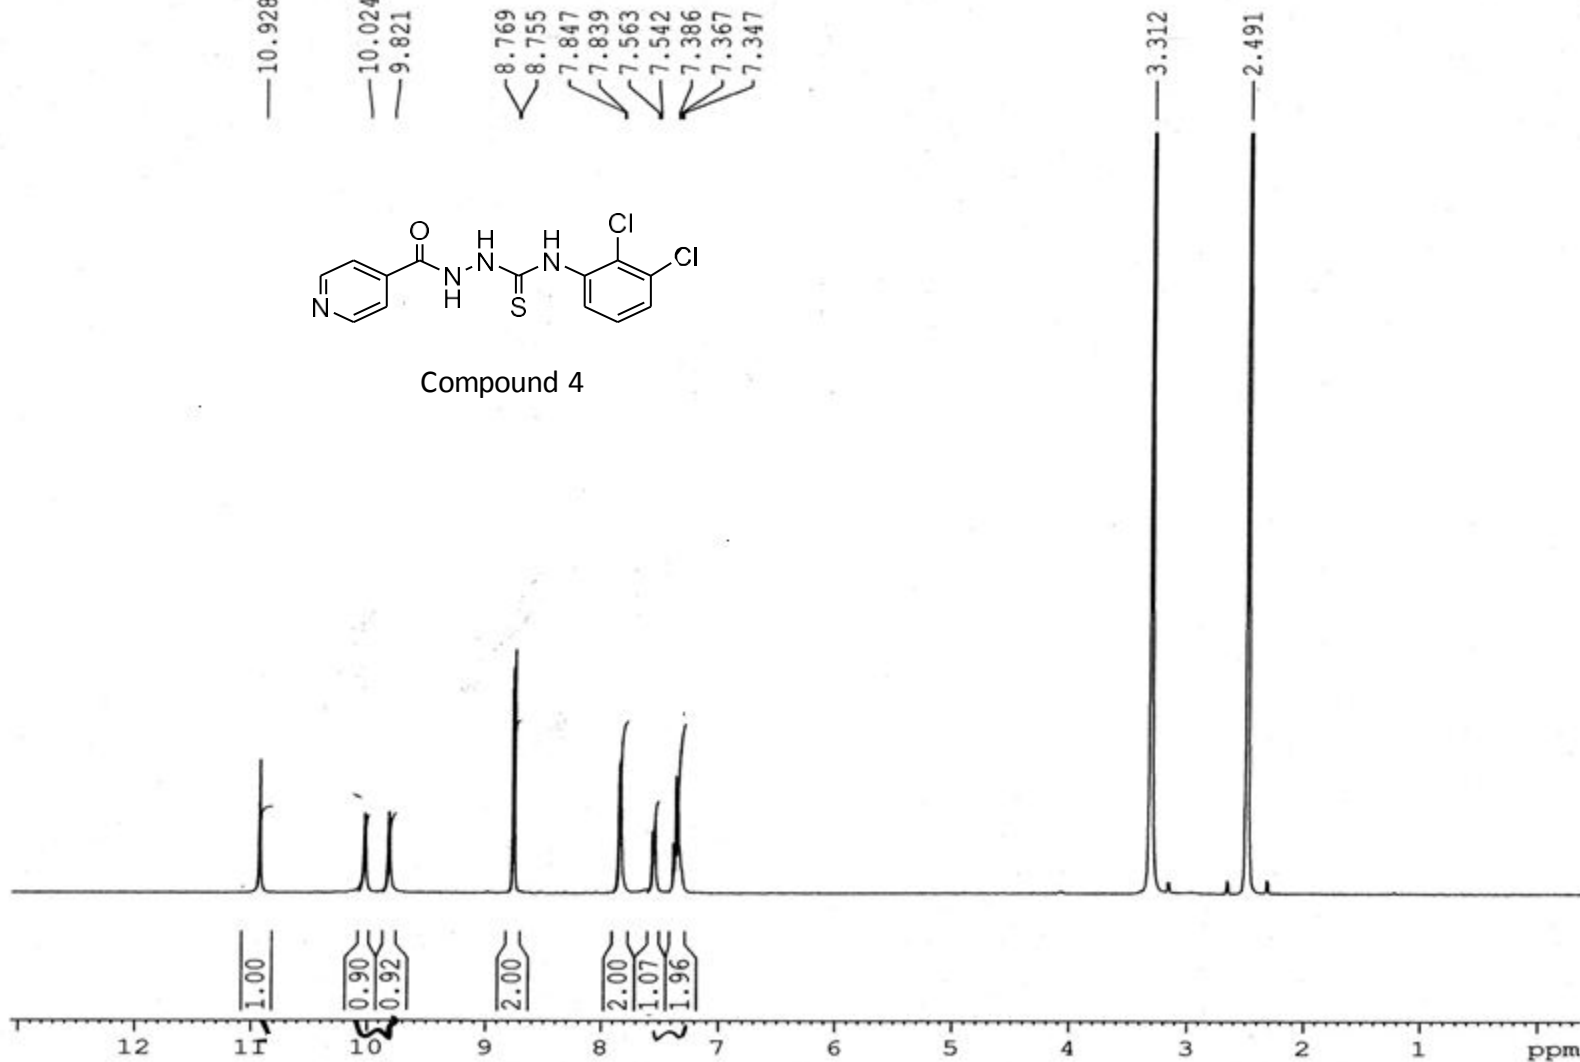

NAME nov01-16  
EXPNO 3  
PROCNO 1  
Date\_ 20161101  
Time\_ 11.20  
INSTRUM spect  
PROBHD 5 mm DUL 13C-1  
PULPROG zg30  
TD 32768  
SOLVENT DMSO  
NS 64  
DS 0  
SWH 8012.820 Hz  
FIDRES 0.244532 Hz  
AQ 2.0447731 sec  
RG 512  
DW 62.400 usec  
DE 6.50 usec  
TE 300.0 K  
D1 2.0000000 sec  
TDO 1

----- CHANNEL f1 -----  
NUC1 1H  
P1 8.40 usec  
PL1 0.00 dB  
SFO1 400.1332010 MHz  
SI 16384  
SF 400.1300064 MHz  
WDW EM  
SSB 0  
LB 0.30 Hz  
GB 0  
PC 1.00



File: FZ-I-ISO26-FABP  
Sample: BUSHRA QAMAR /DR. HINA  
Instrument: JEOL-600H-2  
Inlet: Direct Probe

Date Run: 10-18-2016 (Time Run: 15:43:04)

Ionization mode: FAB+

Scan: 11  
Base: m/z 185; 84.7%FS TIC: 2250680

R.T.: .88

#Ions: 124

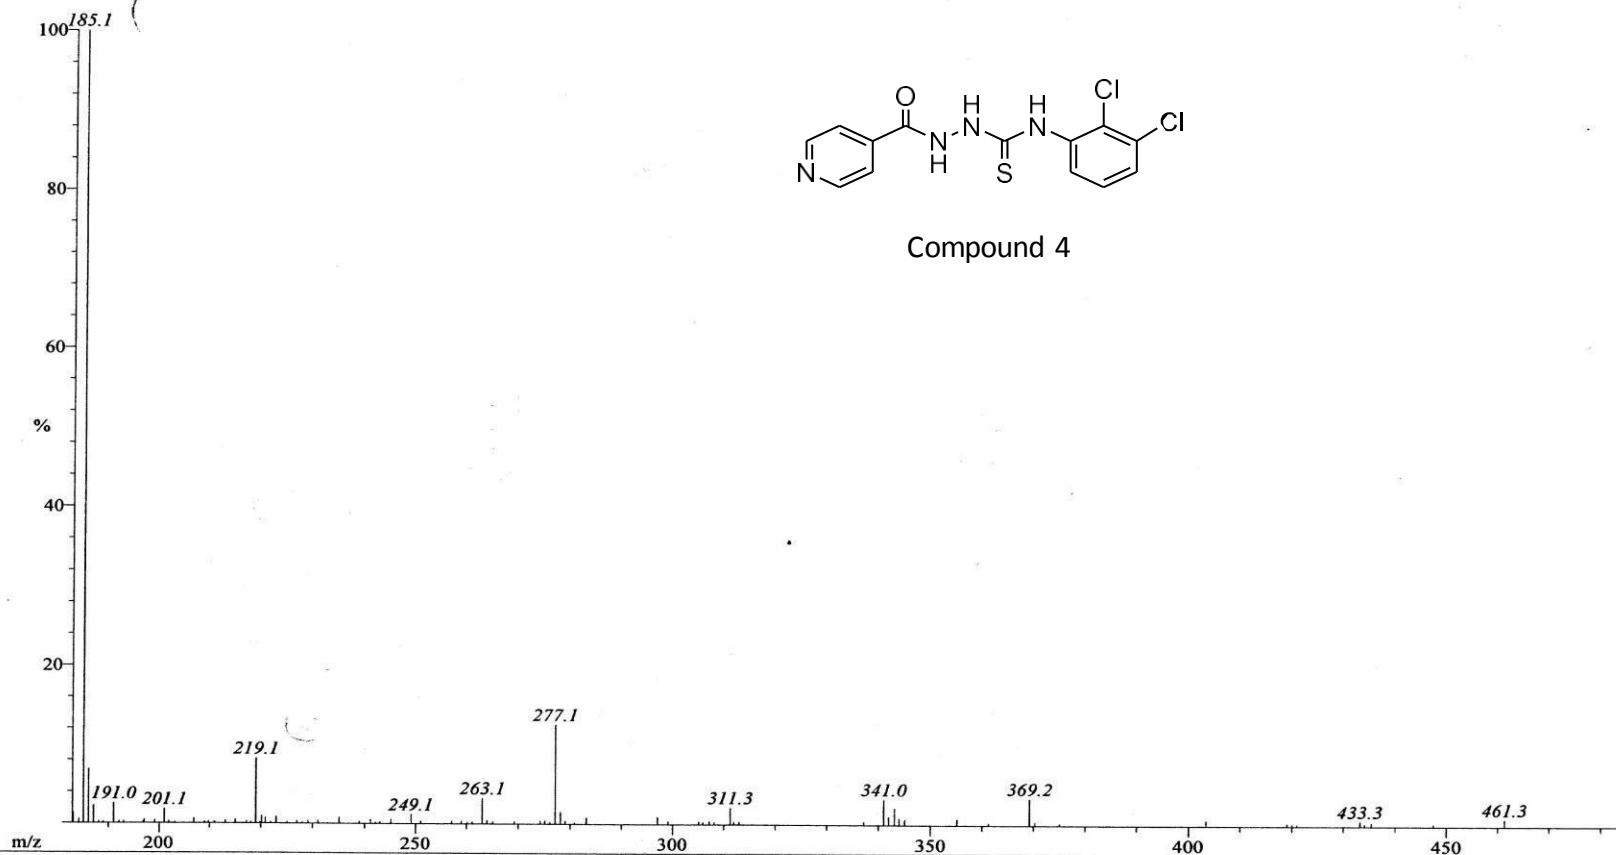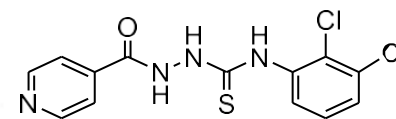

Compound 4



SARAH/DR.HINA/FZ.I.ISO3P  
1H

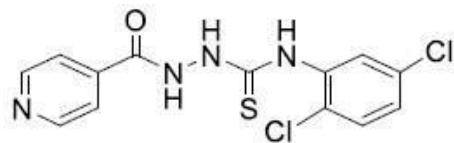

Compound 5

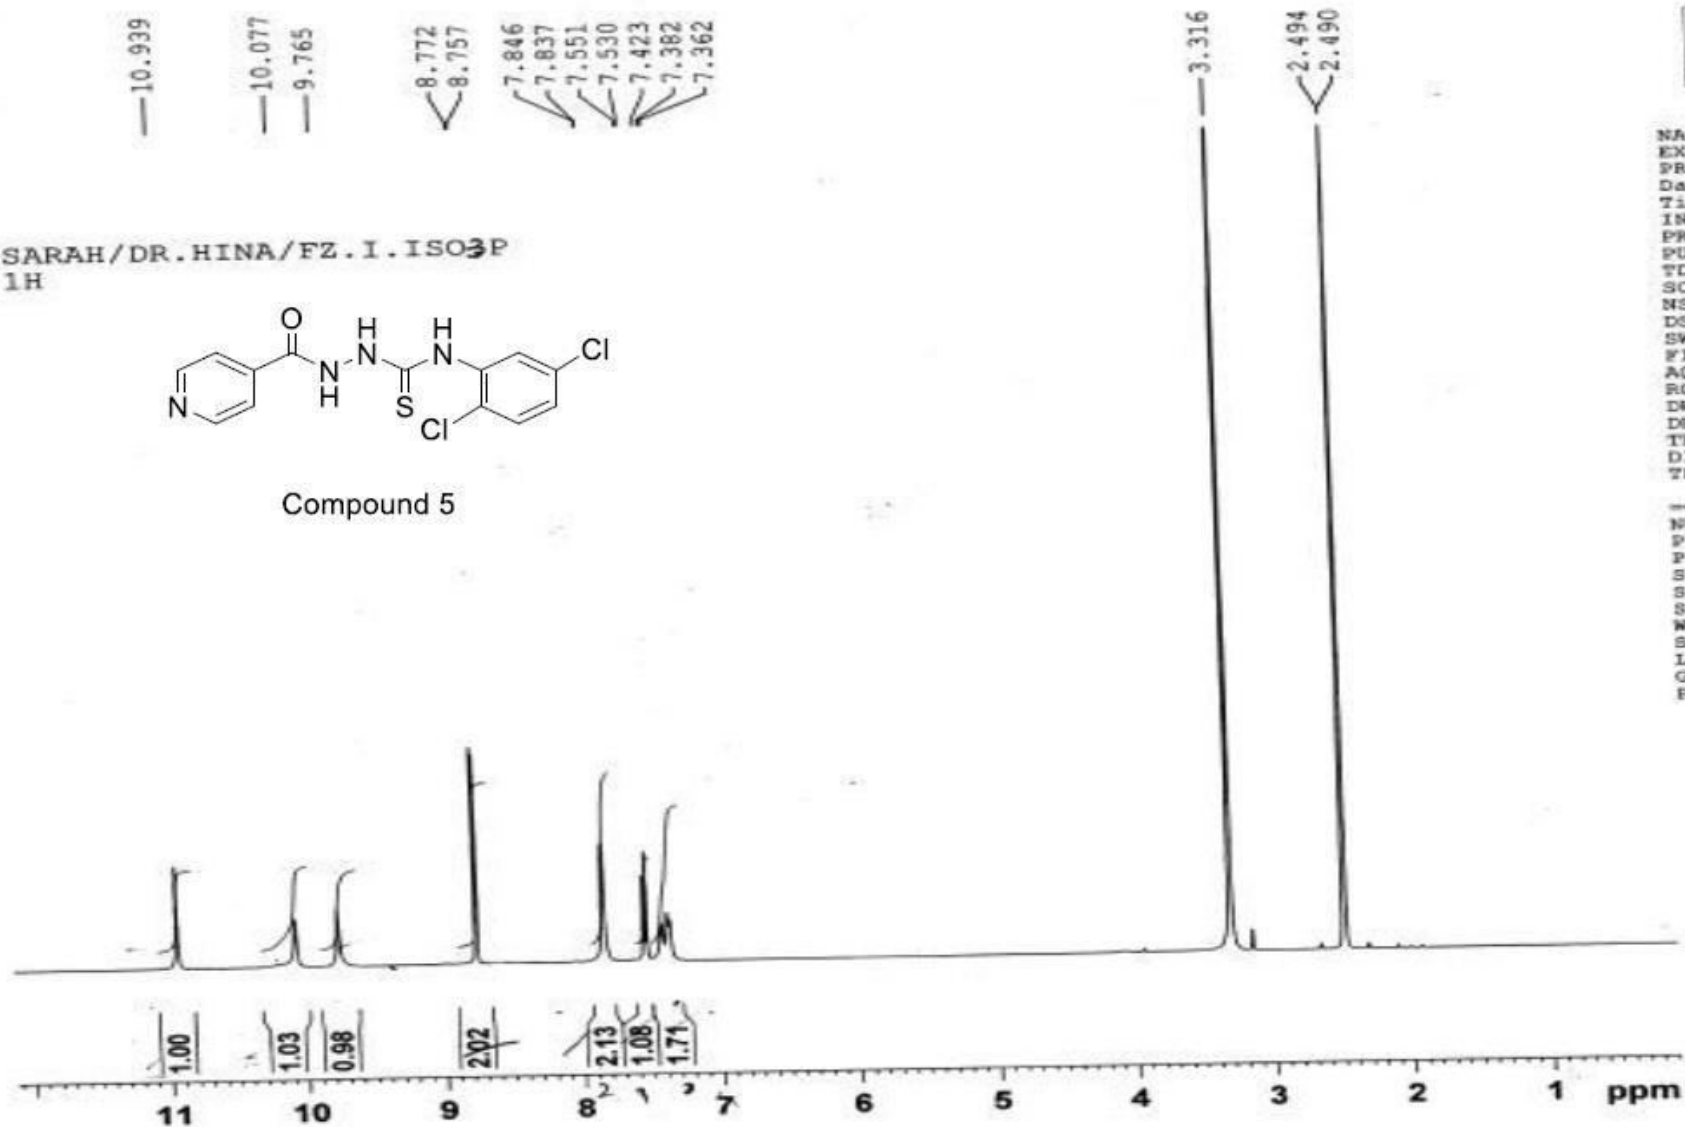

AVANCE AV-400 MHz  
Lab # 115

```

NAME      feb10-16
EXPNO     15
PROCNO    1
Date_     20160210
Time      16.21
INSTRUM   spect
PROBHD    5 mm SEI 1H-13
PULPROG   zg30
TD         65536
SOLVENT   DMSO
NS         128
DS         0
SWH       8012.820 Hz
FIDRES    0.122266 Hz
AQ         4.0894966 sec
RG         256
DM         62.400 usec
DE         6.50 usec
TE         300.0 K
D1         1.50000000 sec
TDS        1
  
```

```

----- CHANNEL f1 -----
NUC1      1H
P1        10.80 usec
PL1       3.00 dB
SFO1     400.0332002 MHz
SI        32768
SF        400.0300041 MHz
WDM       EM
SBB       0
LB        0.30 Hz
GB        0
PC        1.00
  
```

SARAH/DR.HINA/FZ.I.ISO.P  
1H

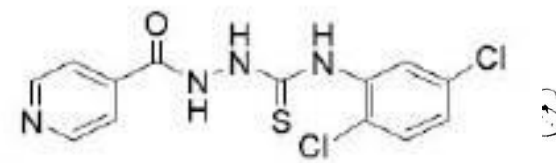

Compound 5

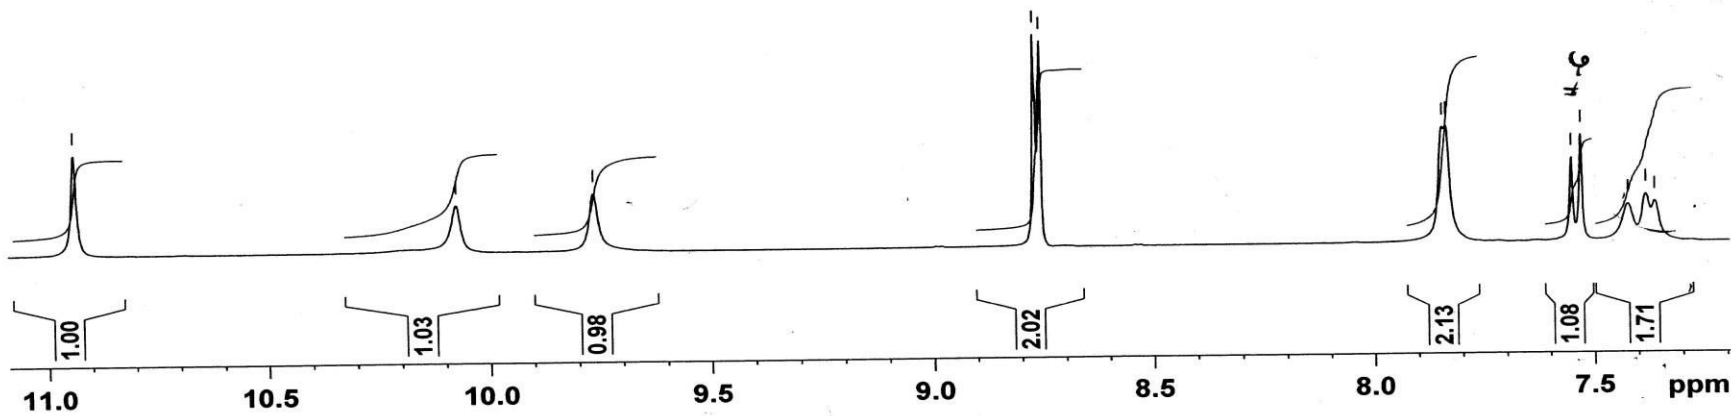

File: FZ-I-ISO3(P)-FABN-1  
Sample: FAZILA /DR. HINA  
Instrument: JEOL-600H-2  
Inlet: Direct Probe

Date Run: 04-06-2016 (Time Run: 10:03:56)

Ionization mode: FAB-

Scan: 7

R.T.: .53

Base: m/z 183; 39.2%FS TIC: 1179980

#Ions: 354

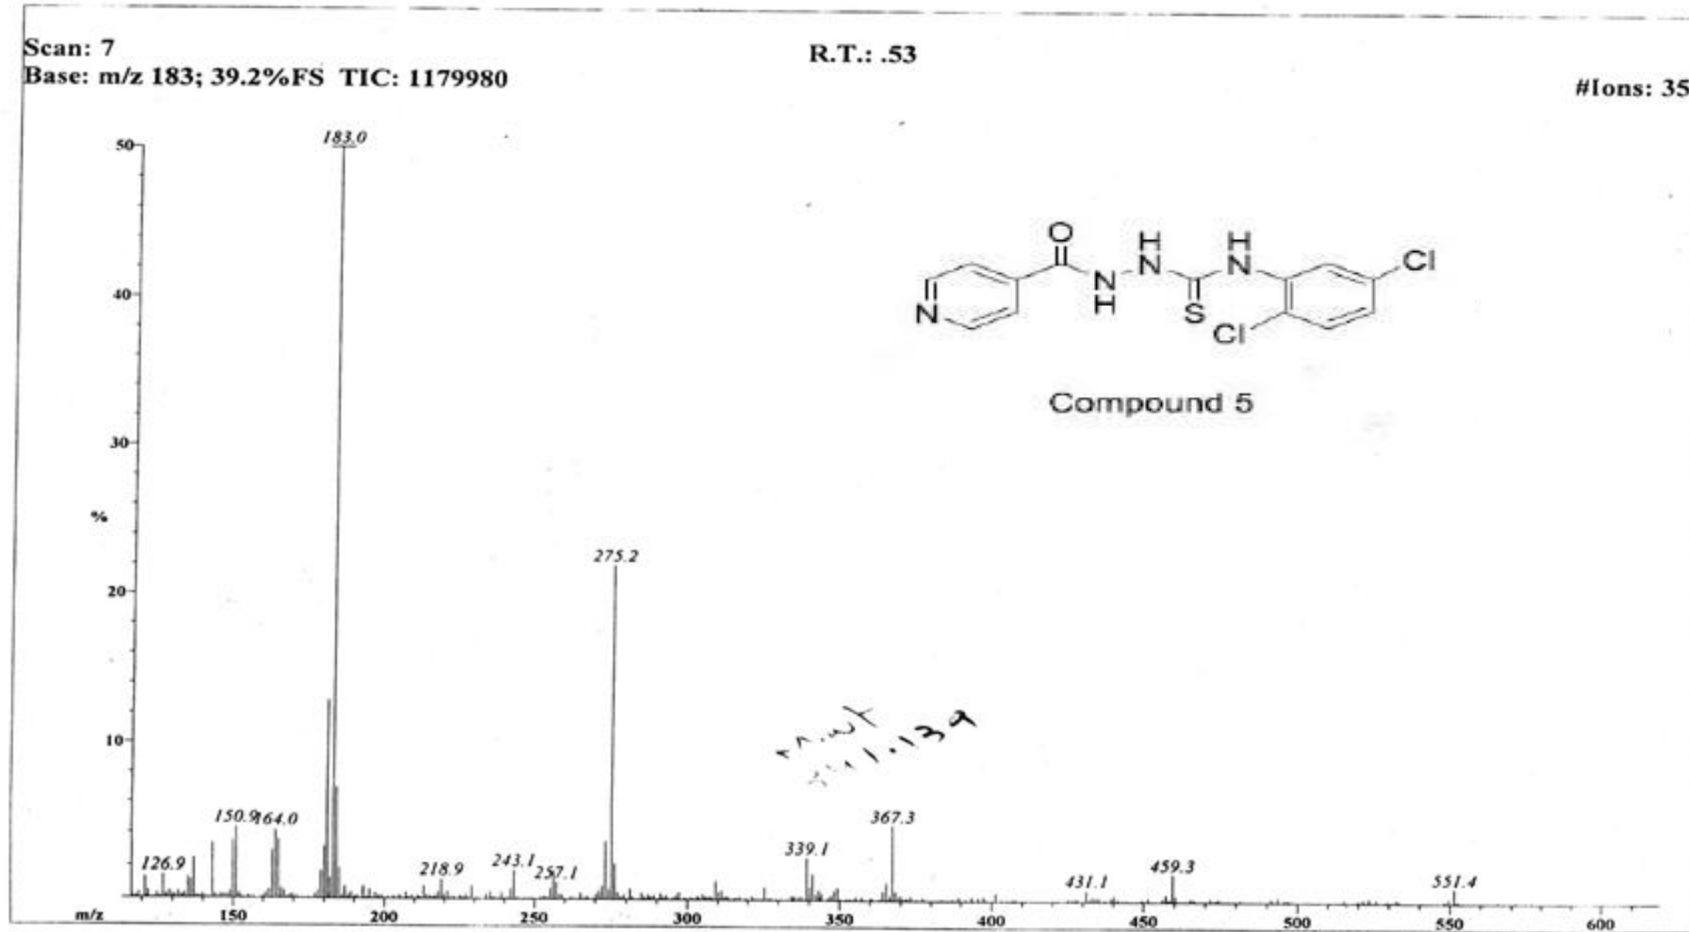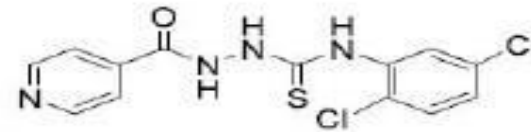

Compound 5

*Handwritten note:*  
m.w.t  
211.139

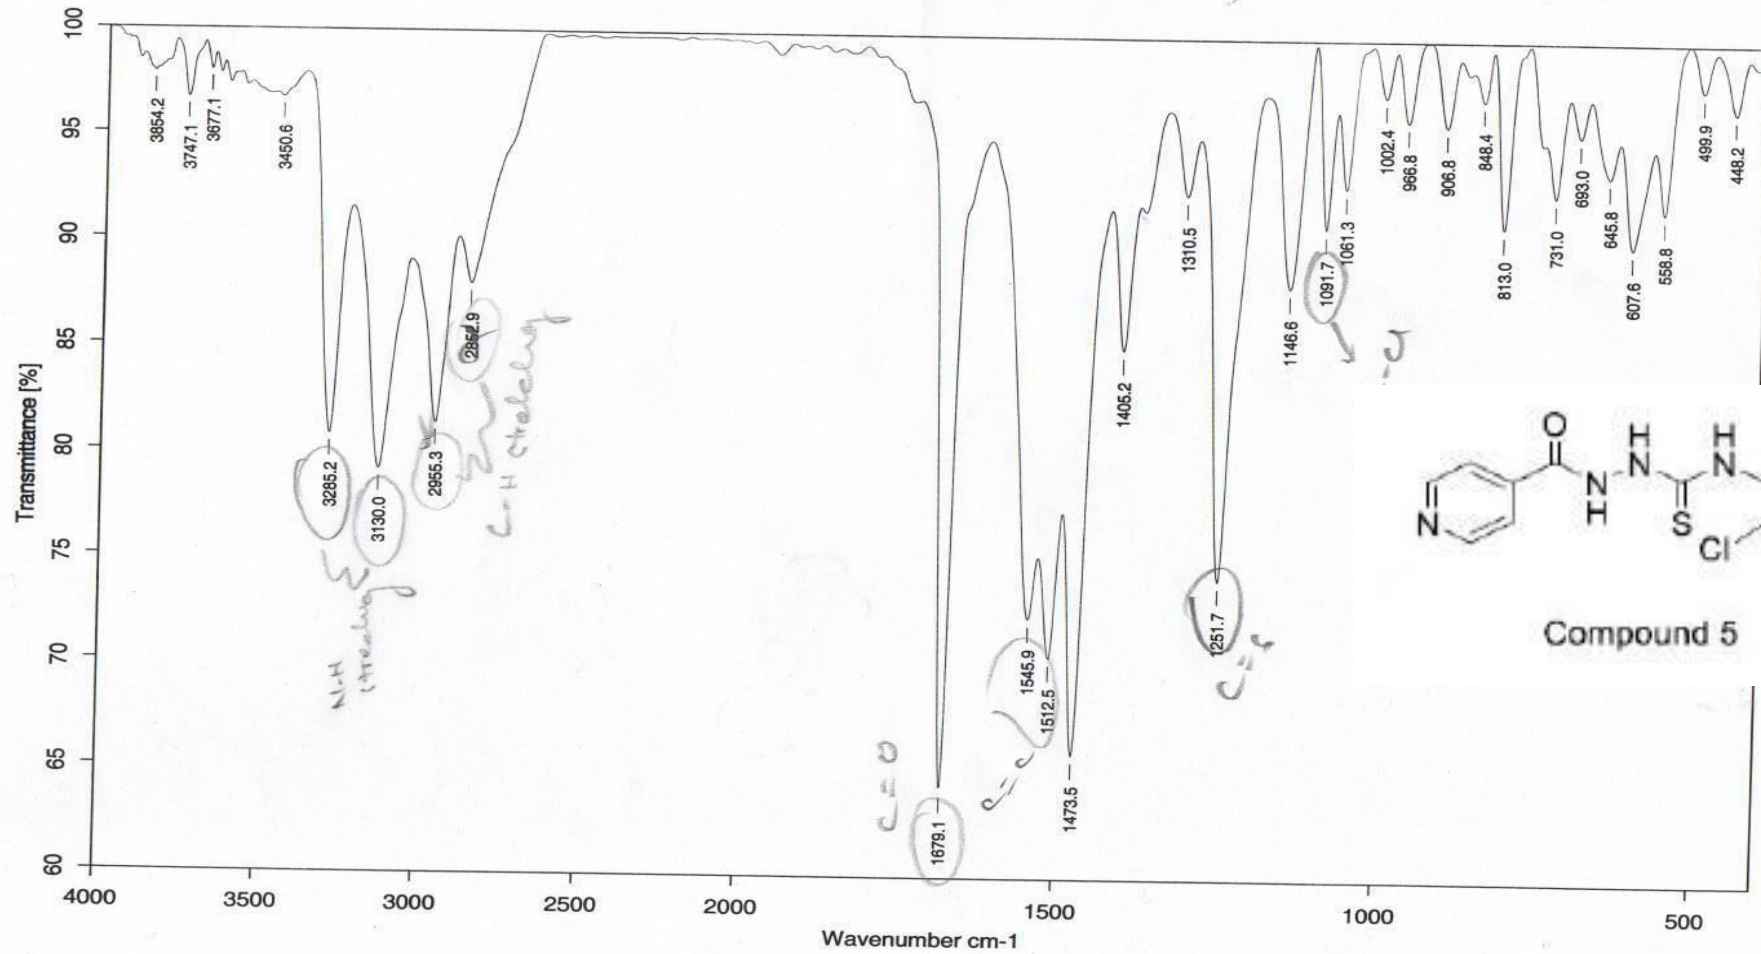

|                                              |                                          |
|----------------------------------------------|------------------------------------------|
| Sample : FZI-ISO3/Fazila Rizvi               | Spectrum : FZ-I-ISO3.0 ( in D:VRSTUDENT) |
| Measured : 19/04/2017 on VECTOR22            | Technic : Solid                          |
| Resolution : 4 cm <sup>-1</sup> ( 10 scans ) | Analyst : MA/ZA/JS                       |

Fazila / Dr. Hina / Fz-I-Iso-4  
1H

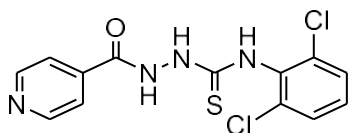

Compound 6

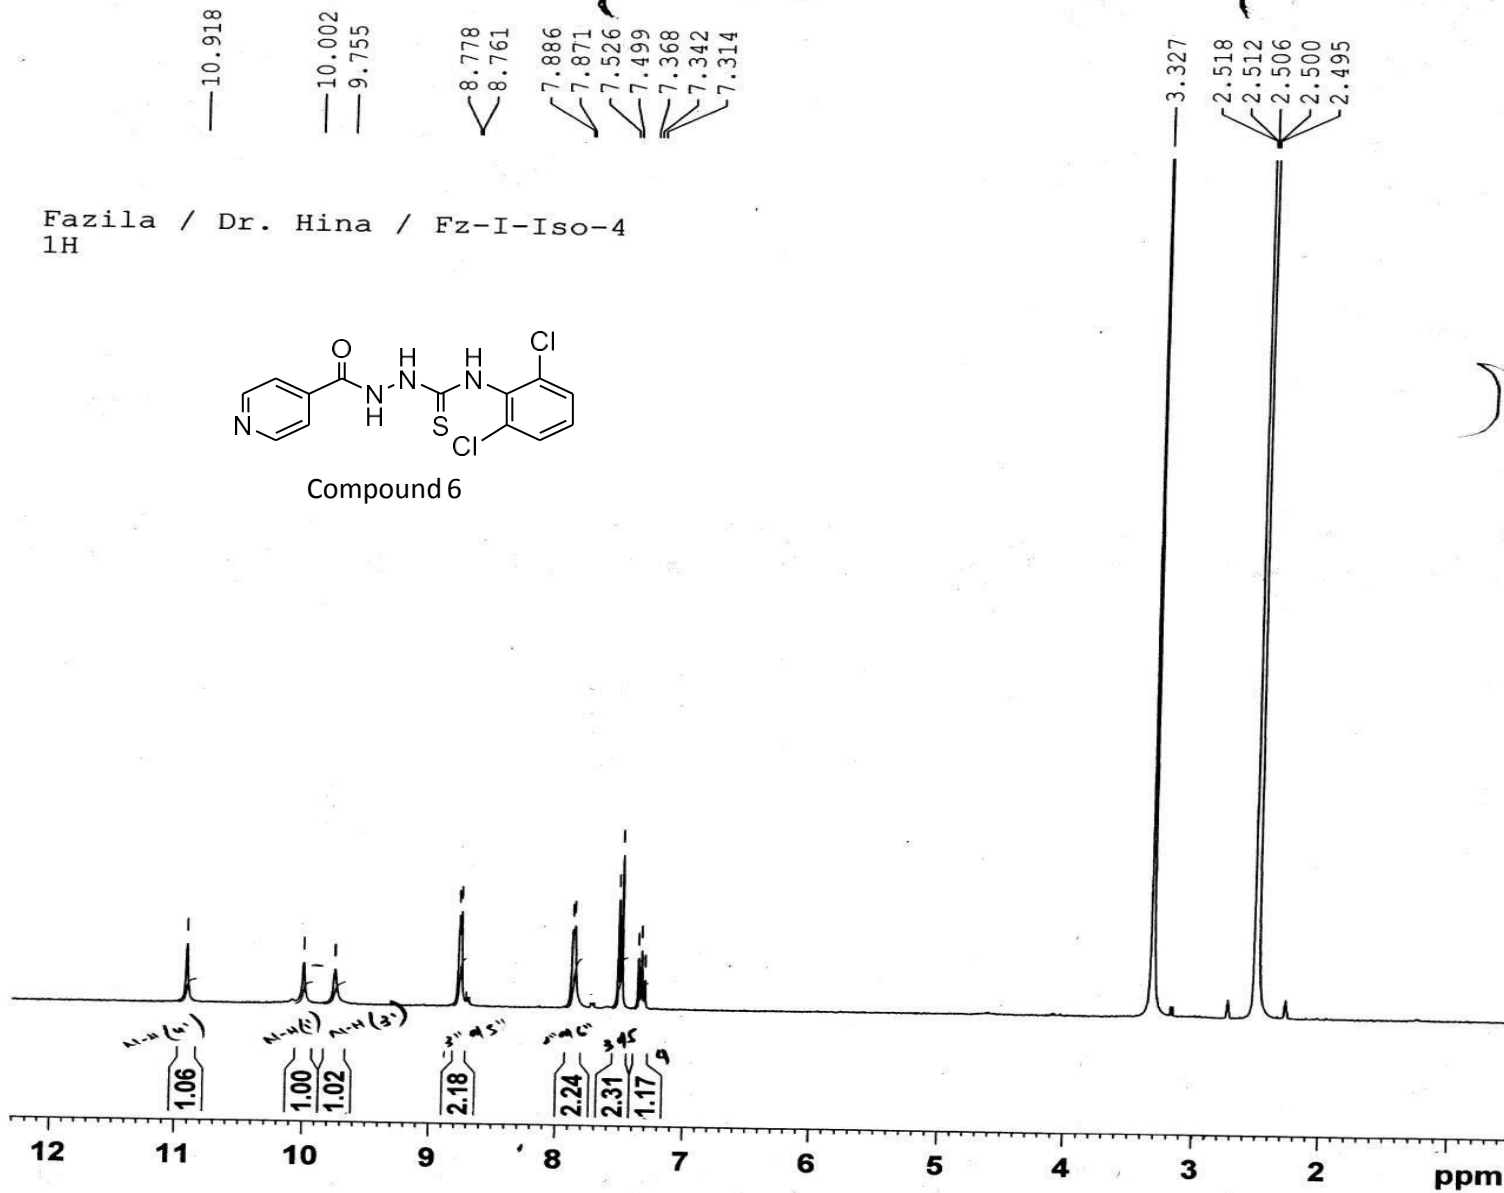

AVANCE AV - III  
300 MHz, LAB # 116

NAME mar22-16  
EXPNO 1  
PROCNO 1  
Date\_ 20160322  
Time\_ 13.13  
INSTRUM Spect  
PROBHD 5 mm BBO BB-1H  
PULPROG zg30  
TD 32768  
SOLVENT DMSO  
NS 128  
DS 0  
SWH 6188.119 Hz  
FIDRES 0.188846 Hz  
AQ 2.6477044 sec  
RG 203  
DW 80.800 usec  
DE 6.50 usec  
TE 300.0 K  
D1 2.00000000 sec  
TD0 1

===== CHANNEL f1 =====  
NUC1 1H  
P1 12.50 usec  
PL1 0.00 dB  
PL1W 13.16228485 W  
SF01 300.1318534 MHz  
SI 32768  
SF 300.1299992 MHz  
WDW EM  
SSB 0  
LB 0.30 Hz  
GB 0  
PC 1.00

Fazila / Dr. Hina / Fz-I-Iso-4  
1H

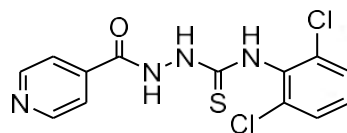

Compound 6

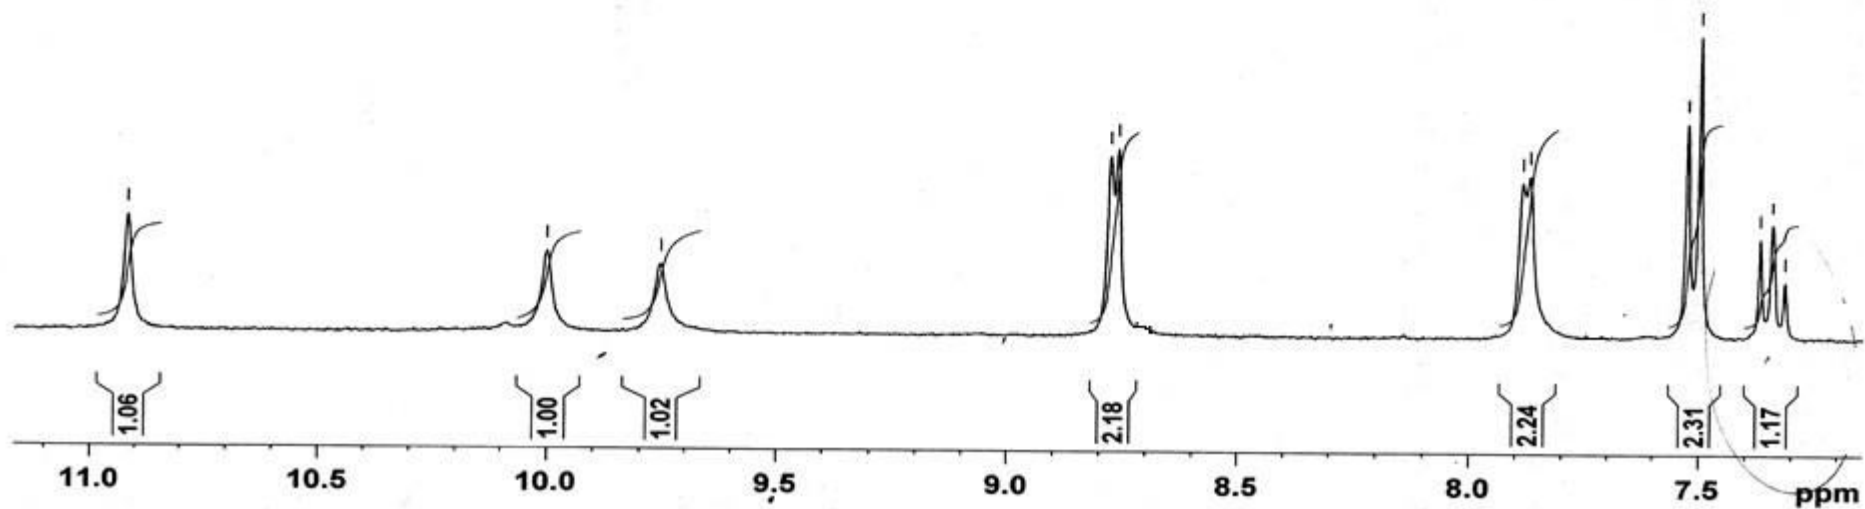

File: FZ-I-ISO4(P)-FABN  
Sample: FAZILA /DR. HINA  
Instrument: JEOL-600H-2  
Inlet: Direct Probe

Date Run: 03-03-2016 (Time Run: 13:21:15)

Ionization mode: FAB-

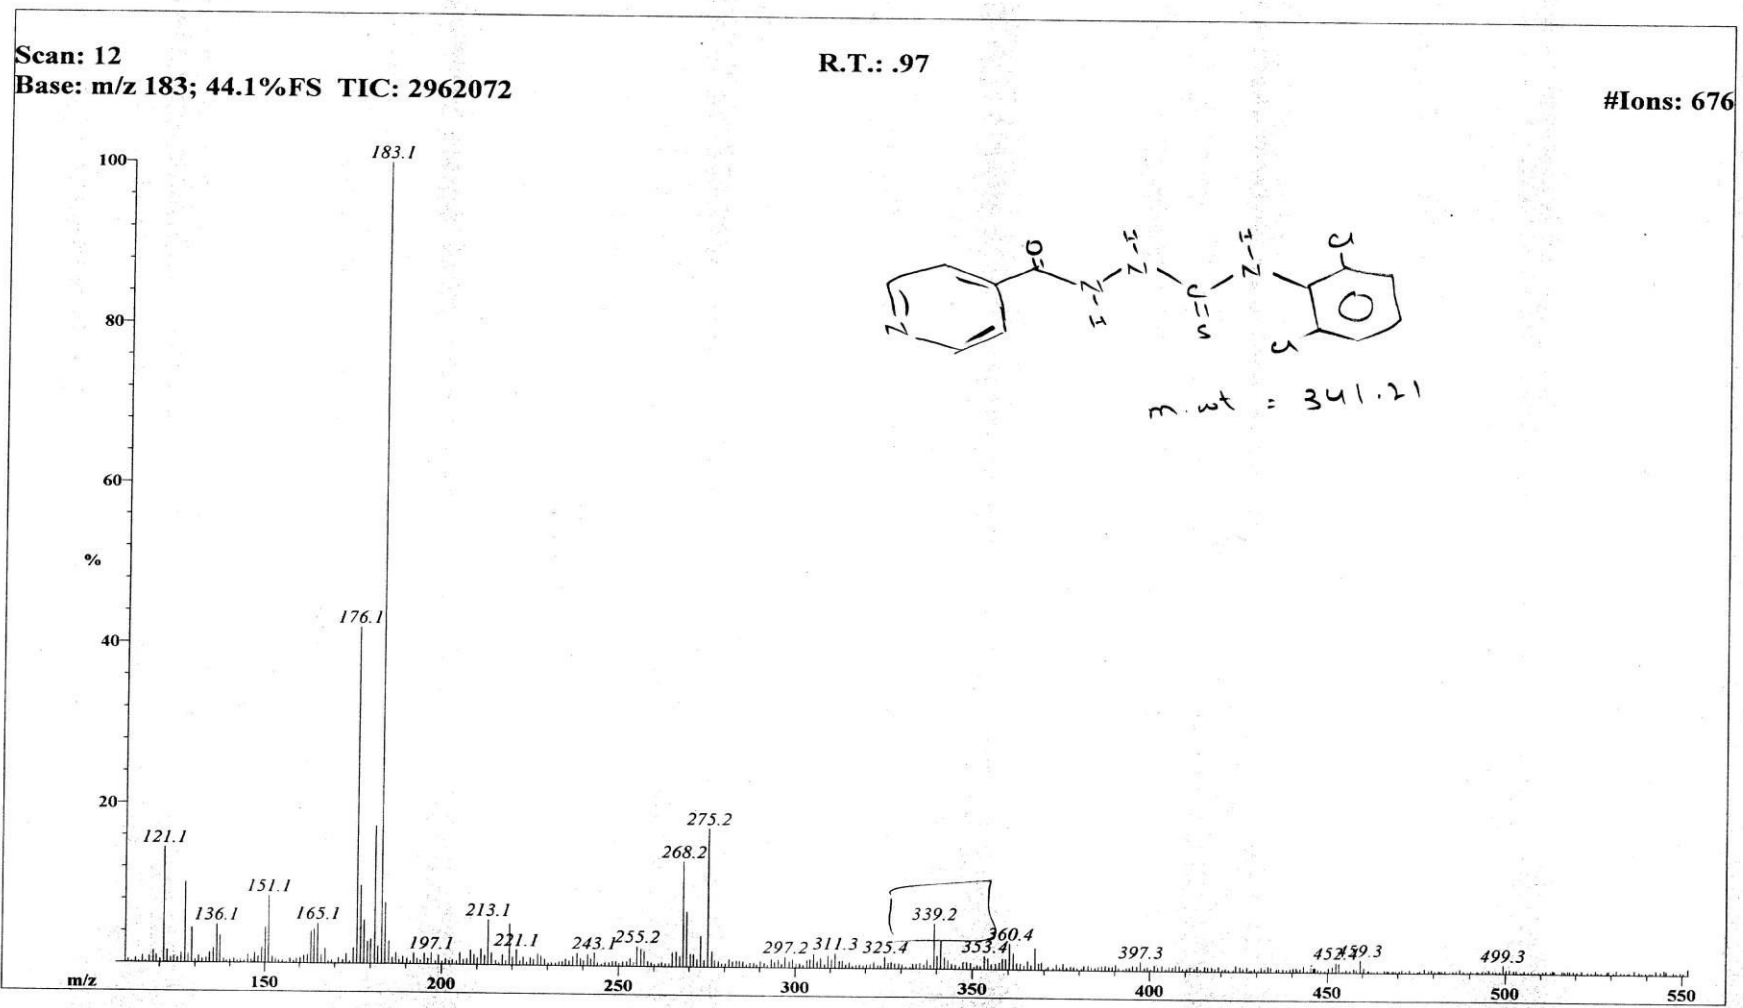

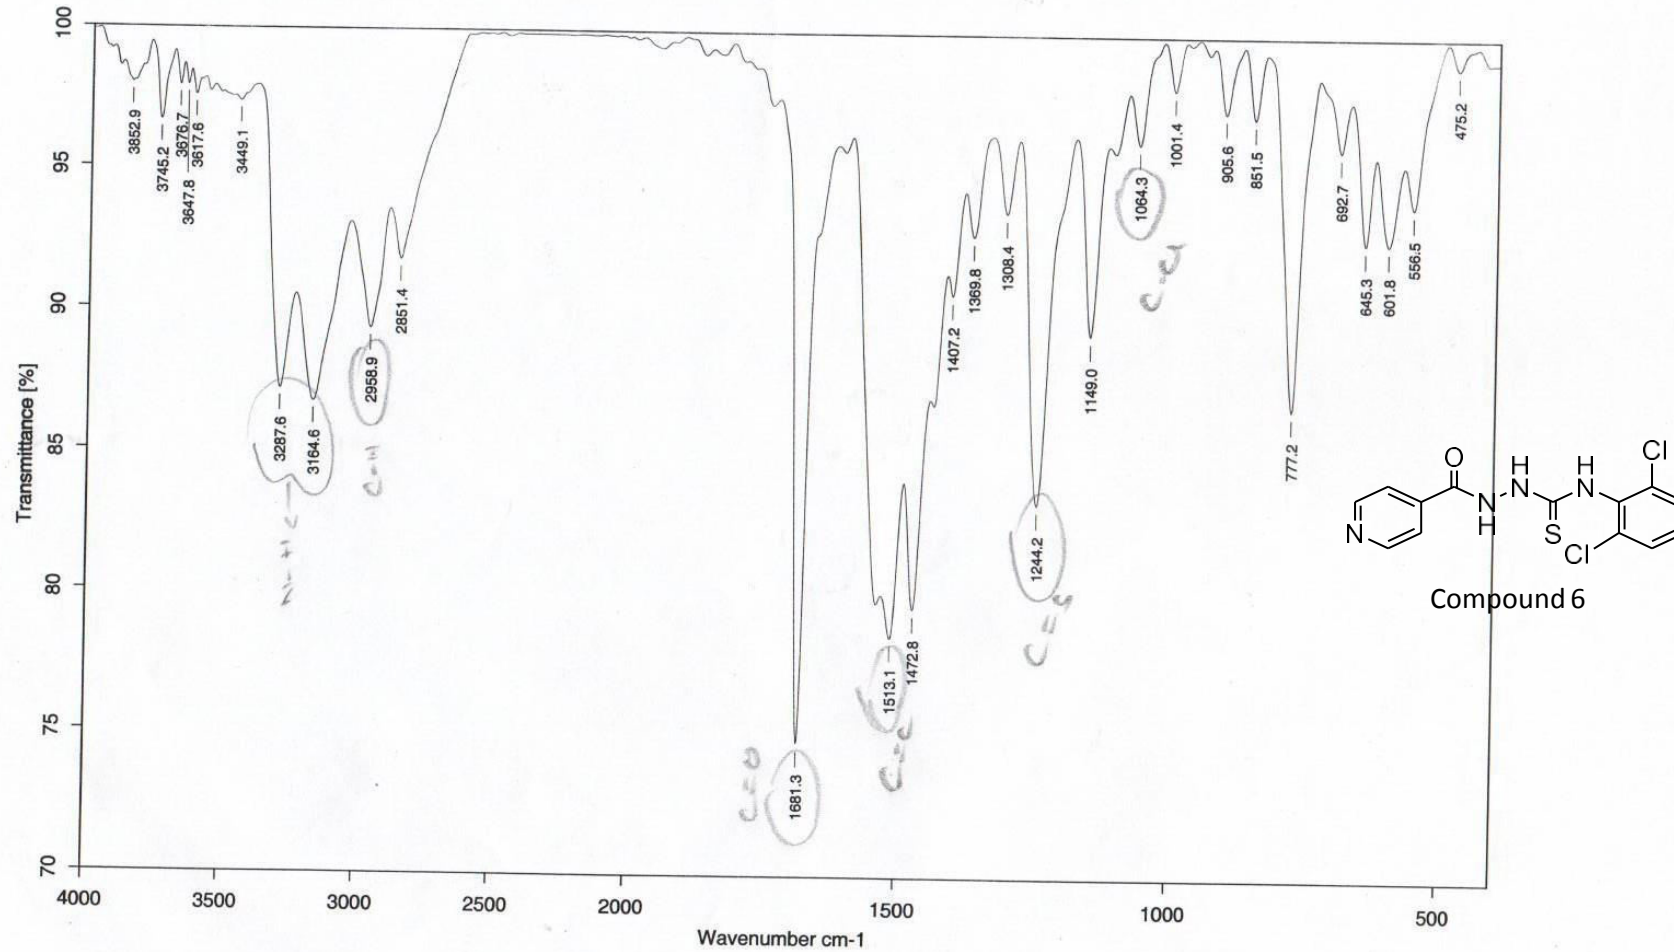

|                                   |                                         |
|-----------------------------------|-----------------------------------------|
| Sample : FZI-ISO4/Fazila Rizvi    | Spectrum : FZ-I-ISO4.0 (in D:IRSTUDENT) |
| Measured : 19/04/2017 on VECTOR22 | Technic : Solid                         |
| Resolution : 4 cm-1 ( 10 scans )  | Analyst : MA/ZA/JS                      |



FAZILA/DR.HINA/FZ.I.ISO.12/5  
1H

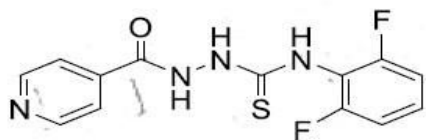

Compound 7

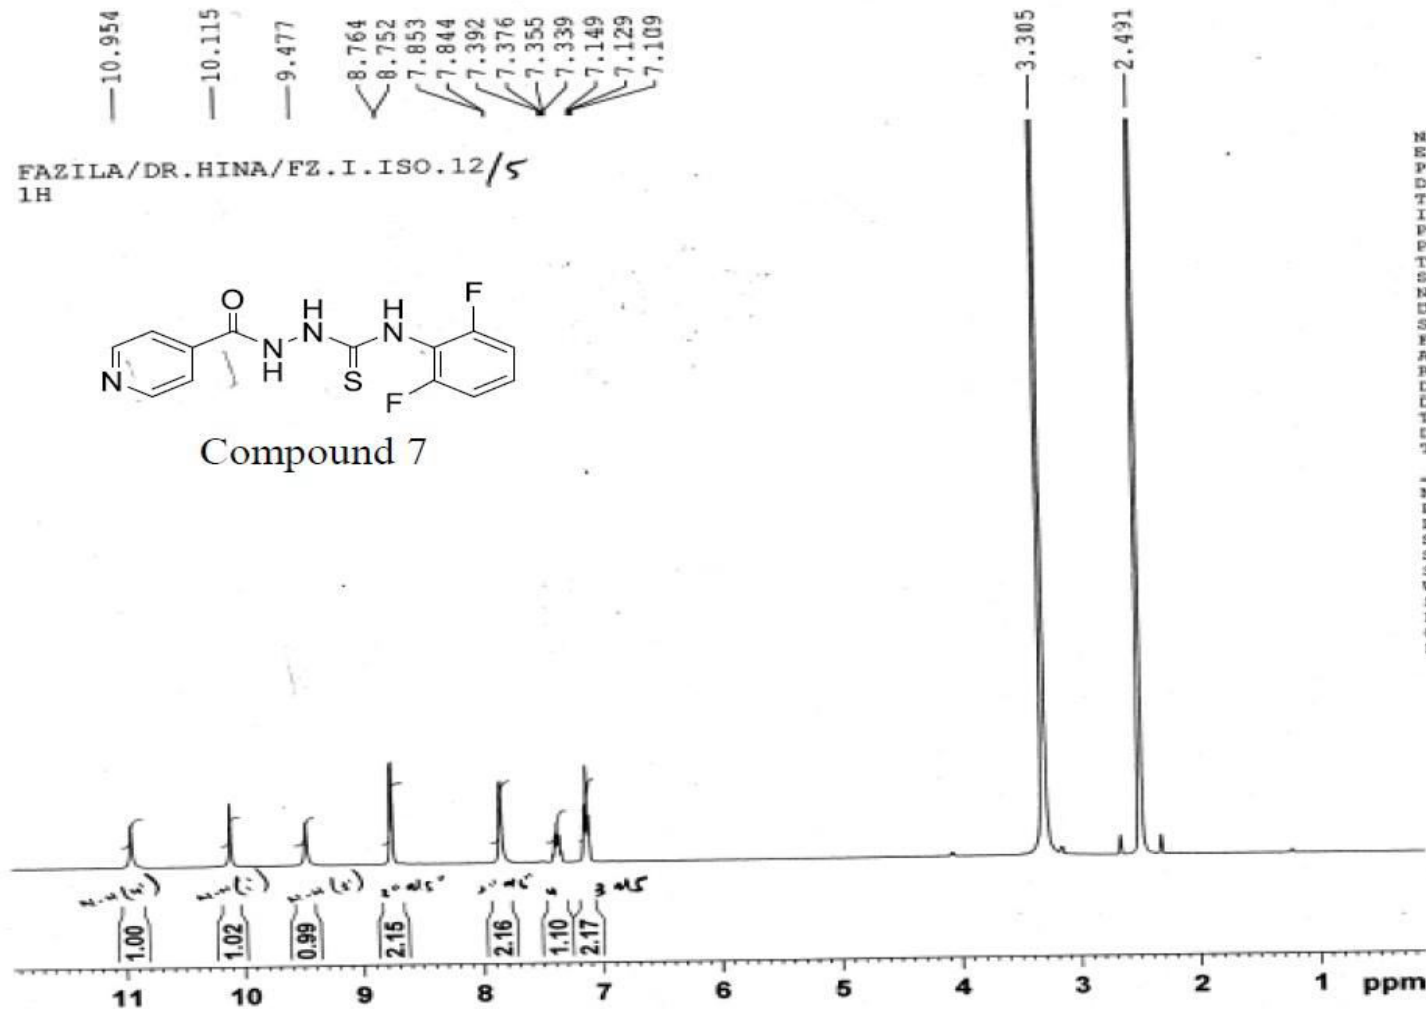

AVANCE AV-400 MHz  
Lab # 115

|         |                |
|---------|----------------|
| NAME    | AUG15-16       |
| EXPNO   | 5              |
| PROCNO  | 1              |
| Date_   | 20160815       |
| Time    | 12.59          |
| INSTRUM | spcct          |
| PROBHD  | 5 mm SRI 1H-13 |
| PULPROG | zg30           |
| TD      | 65536          |
| SOLVENT | DMSO           |
| NS      | 128            |
| DS      | 0              |
| SWH     | 8012.820 Hz    |
| FIDRES  | 0.122266 Hz    |
| AQ      | 4.0894966 sec  |
| RG      | 256            |
| DW      | 62.400 usec    |
| DE      | 6.50 usec      |
| TE      | 300.0 K        |
| DE      | 1.50000000 sec |
| TD0     | 1              |

|                        |             |      |
|------------------------|-------------|------|
| ----- CHANNEL f1 ----- |             |      |
| NUC1                   | 1H          |      |
| P1                     | 10.80       | usec |
| PL1                    | 3.00        | dB   |
| SFO1                   | 400.0332002 | MHz  |
| SI                     | 32768       |      |
| SF                     | 400.0300041 | MHz  |
| WDM                    | EM          |      |
| SSB                    | 0           |      |
| LB                     | 0.30        | Hz   |
| GB                     | 0           |      |
| PC                     | 0.20        |      |

—10.954

—10.115

—9.477

<8.764  
<8.752

<7.853  
<7.844

<7.392  
<7.376  
<7.355  
<7.339

<7.149  
<7.129  
<7.109

FAZILA/DR.HINA/FZ.I.ISO.12  
1H

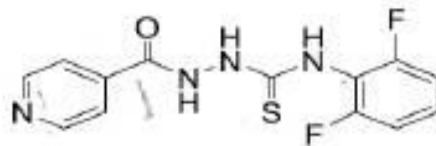

Compound 7

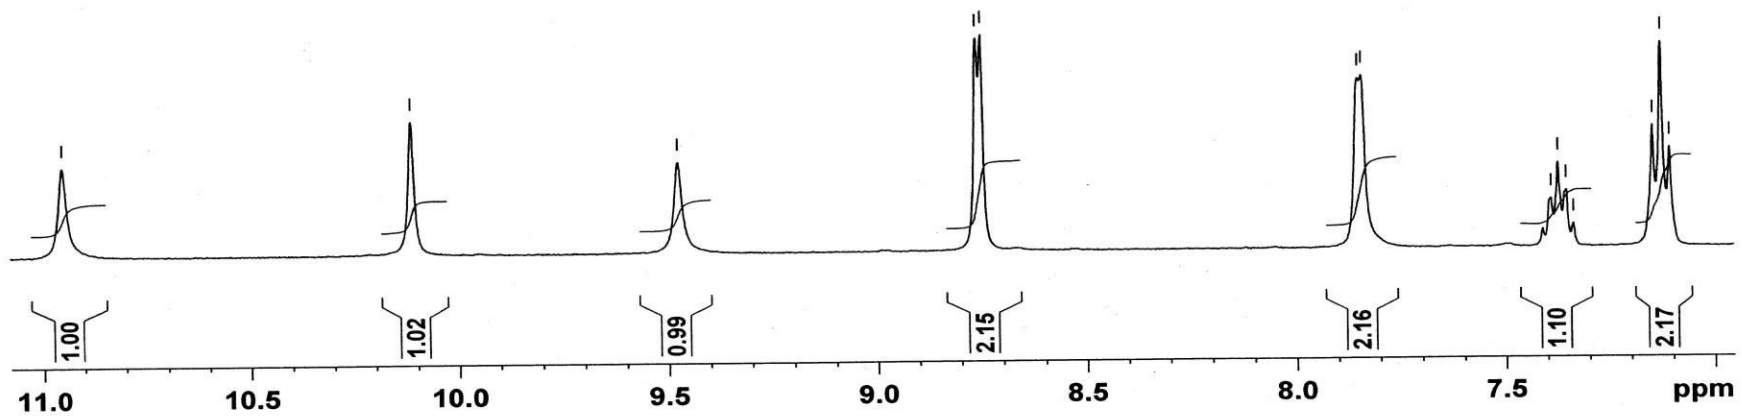

8.764  
8.752

7.853  
7.844

7.392  
7.376  
7.355  
7.339

7.149  
7.129  
7.109

FAZILA/DR.HINA/FZ.I.ISO.12  
1H

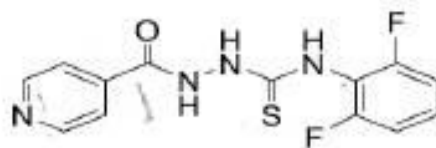

Compound 7

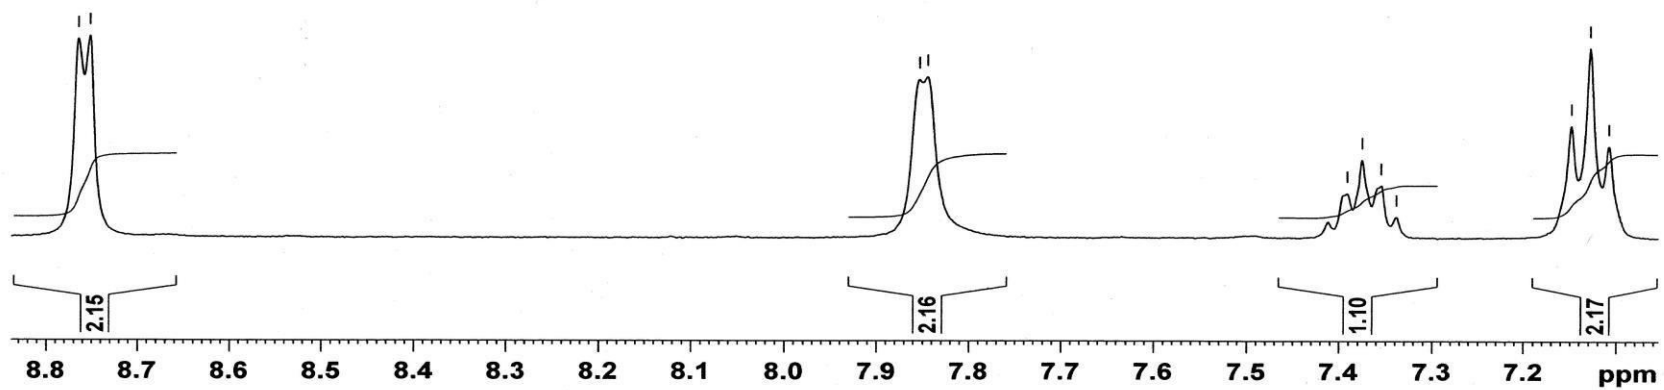

File: FZ-I-ISO-12  
Sample: FAZILA RIZVI /DR. HINA  
Instrument: JEOL-600H-2  
Inlet: Direct Probe

Date Run: 08-15-2016 (Time Run: 16:05:45)

Ionization mode: FAB+

Scan: 4  
Base: m/z 185; 100%FS TIC: 6513332

R.T.: .27

#Ions: 302

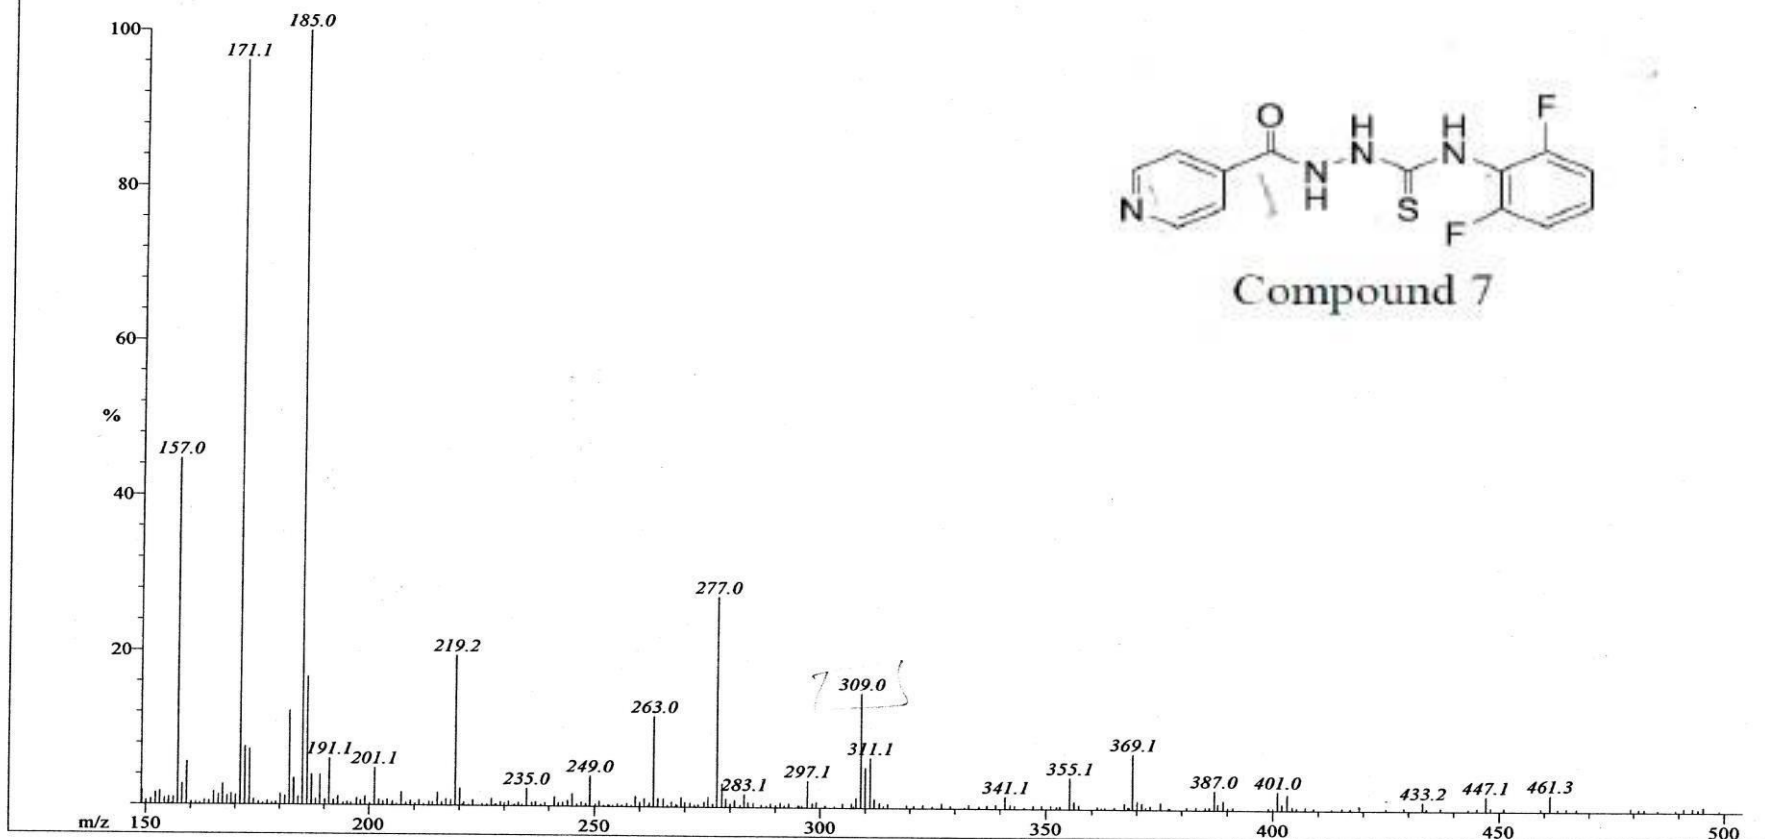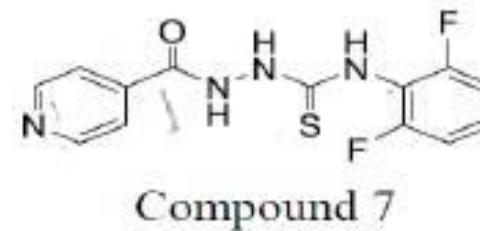

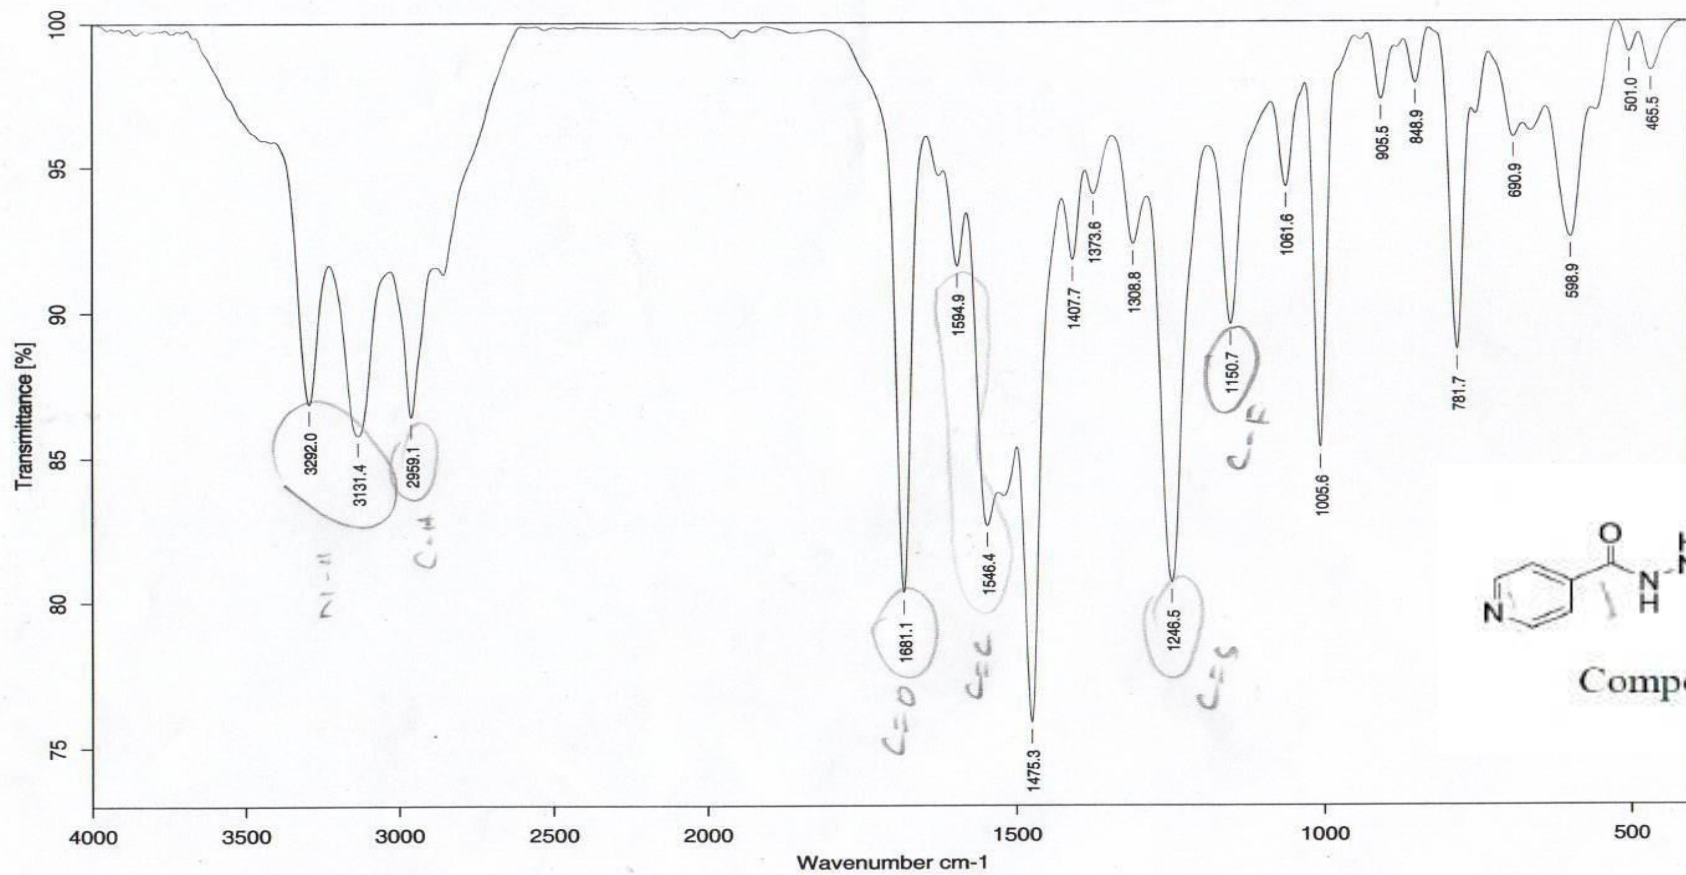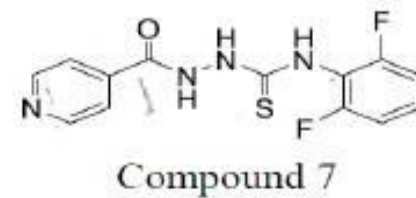

Sample : FZI-ISO12/Fazila Rizvi

Measured : 19/04/2017 on VECTOR22

Resolution : 4 cm-1 ( 10 scans )

Spectrum : FZ-I-ISO12.0 ( in D:\IRSTUDENT )

Technic : Solid

Analyst : MA/ZA/JS

AVANCE AV-400 MHz  
Lab # 115

FAZILA/DR.HINA/FZ.I.ISO.13/1206  
1H

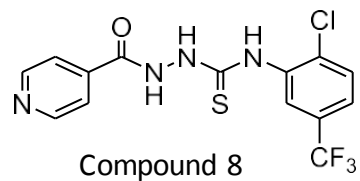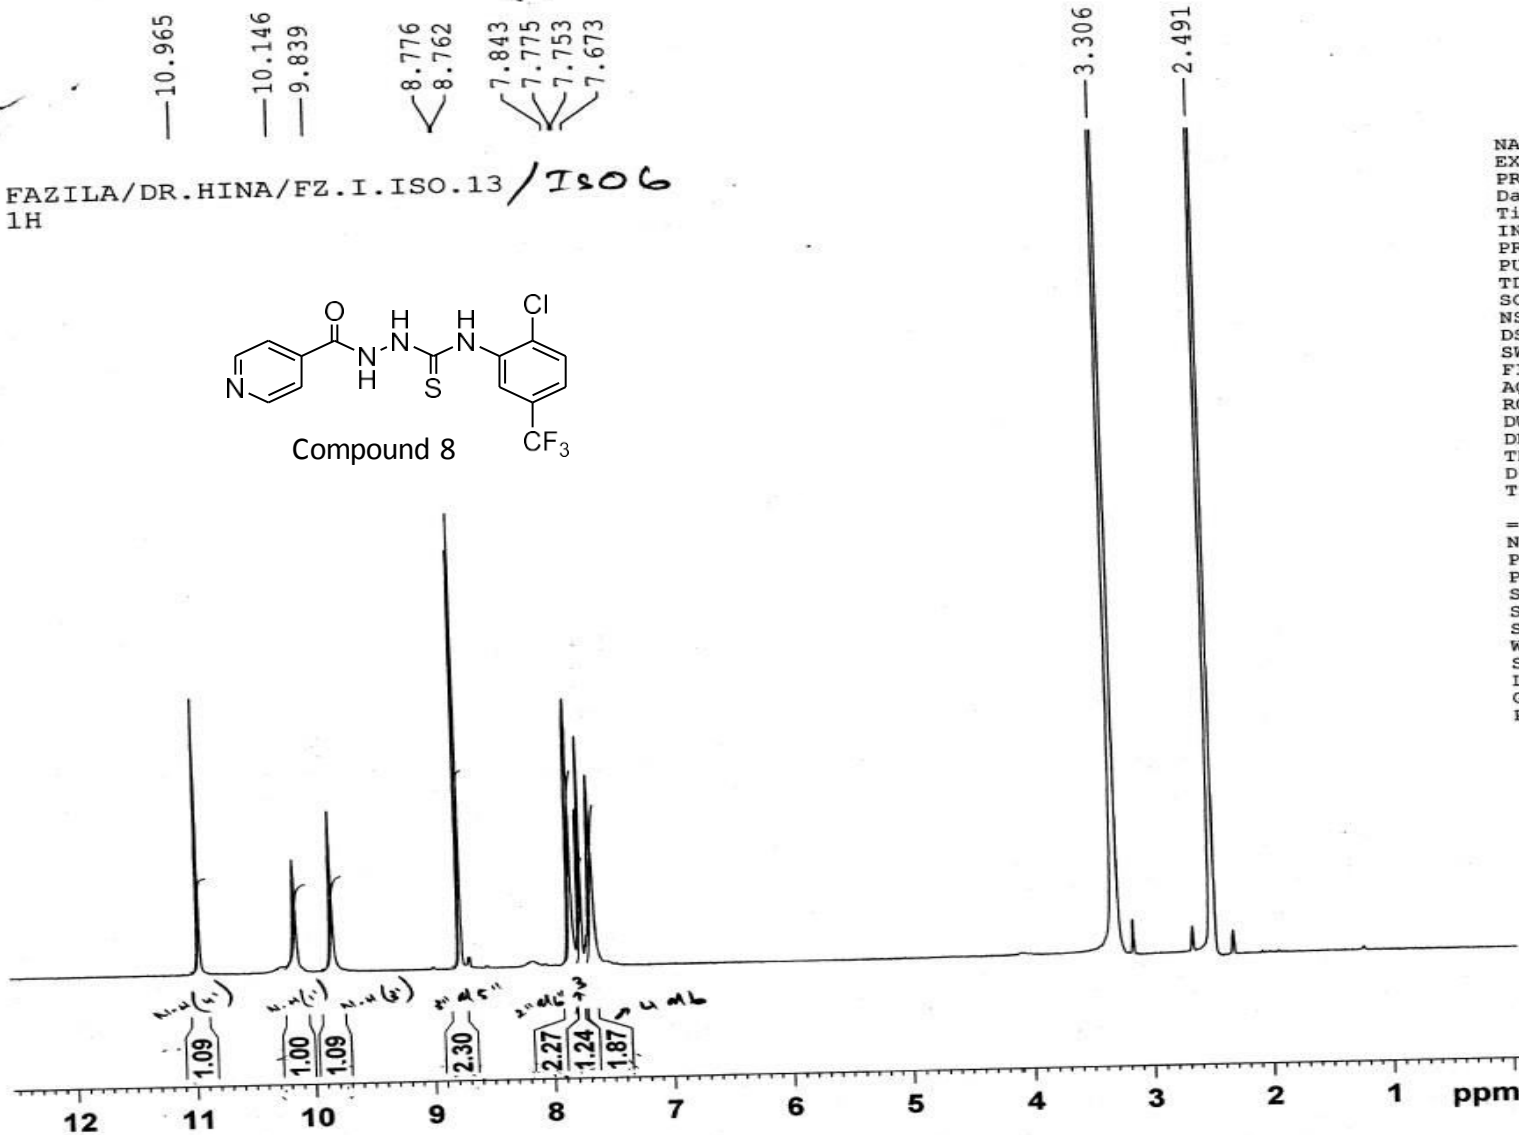

NAME AUG23-16  
 EXPNO 9  
 PROCNO 1  
 Date 20160823  
 Time 16.21  
 INSTRUM spect  
 PROBHD 5 mm SEI 1H-13  
 PULPROG zg30  
 TD 65536  
 SOLVENT DMSO  
 NS 64  
 DS 0  
 SWH 8012.820 Hz  
 FIDRES 0.122266 Hz  
 AQ 4.0894966 sec  
 RG 362  
 DW 62.400 usec  
 DE 6.50 usec  
 TE 300.0 K  
 D1 2.00000000 sec  
 TD0 1

===== CHANNEL f1 =====  
 NUC1 1H  
 P1 10.80 usec  
 PL1 3.00 dB  
 SFO1 400.0332002 MHz  
 SI 32768  
 SF 400.0300041 MHz  
 WDW EM  
 SSB 0  
 LB 0.30 Hz  
 GB 0  
 PC 0.20

FAZILA/DR.HINA/FZ.I.ISO.13  
1H

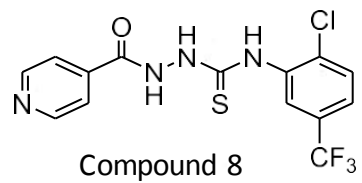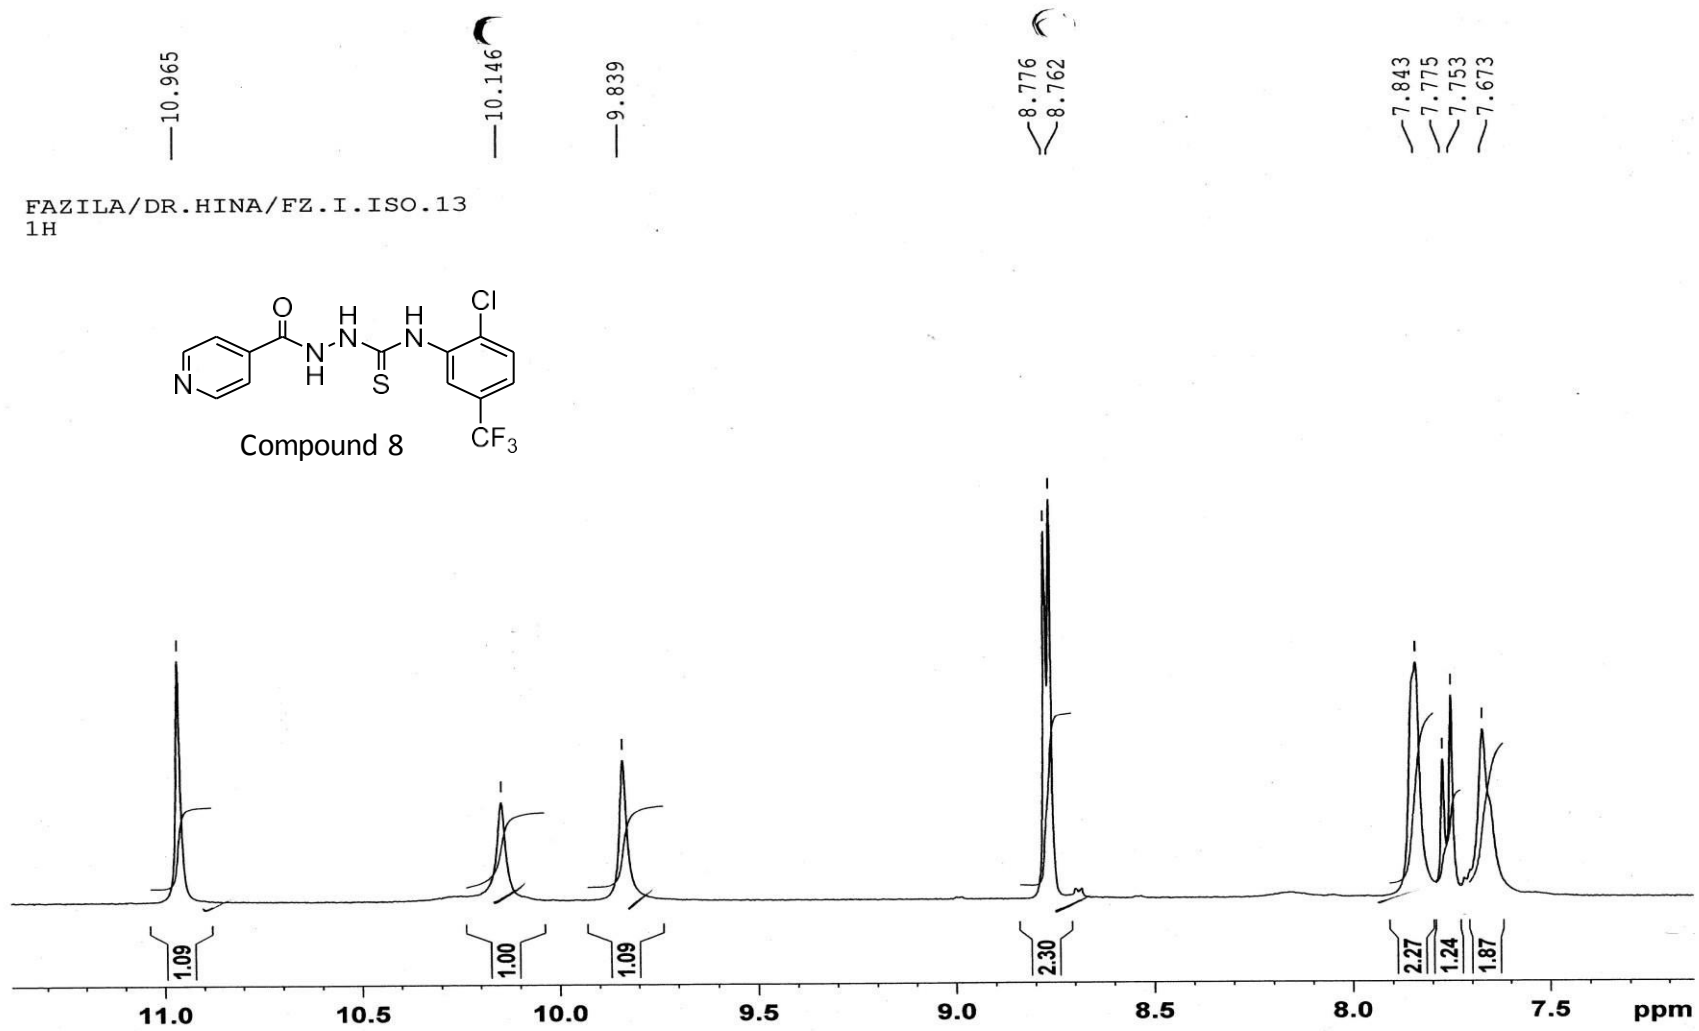

File: FZ-I-ISO6(Me)-FABN  
Sample: FAZILA /DR. HINA  
Instrument: JEOL-600H-2  
Inlet: Direct Probe

Date Run: 04-06-2016 (Time Run: 10:12:59)

Ionization mode: FAB-

Scan: 2

R.T.: .1

Base: m/z 373; 17.1%FS TIC: 1081342

#Ions: 353

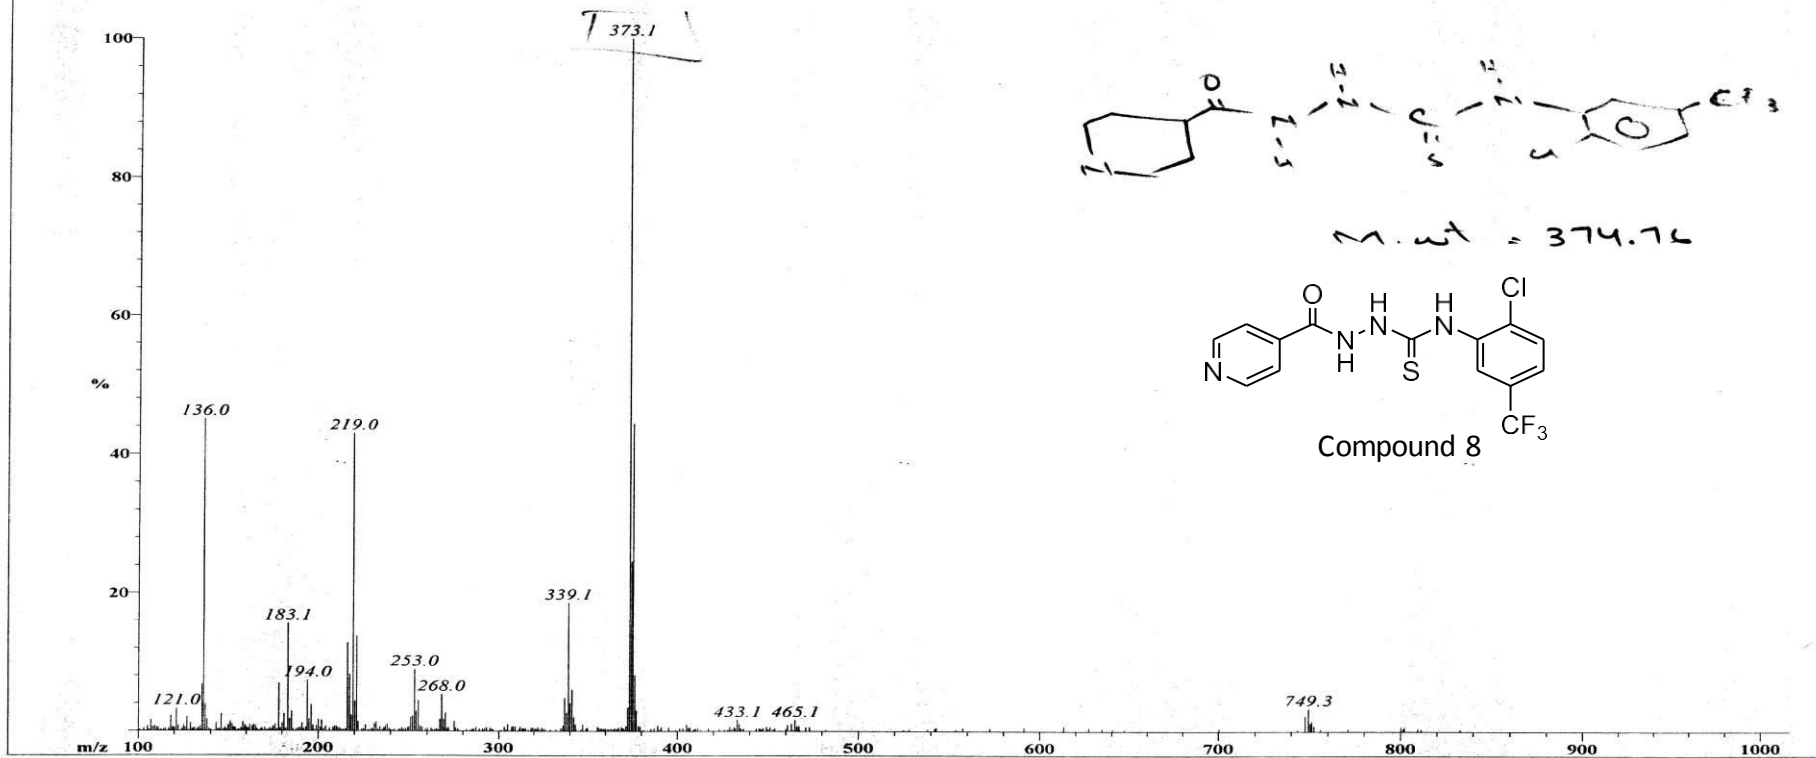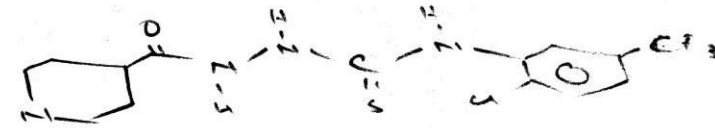

M.Wt = 374.76

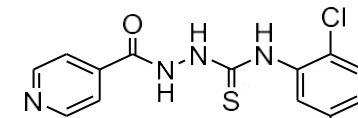

Compound 8



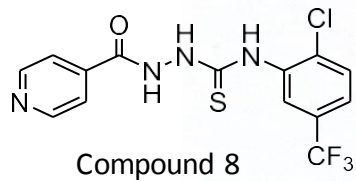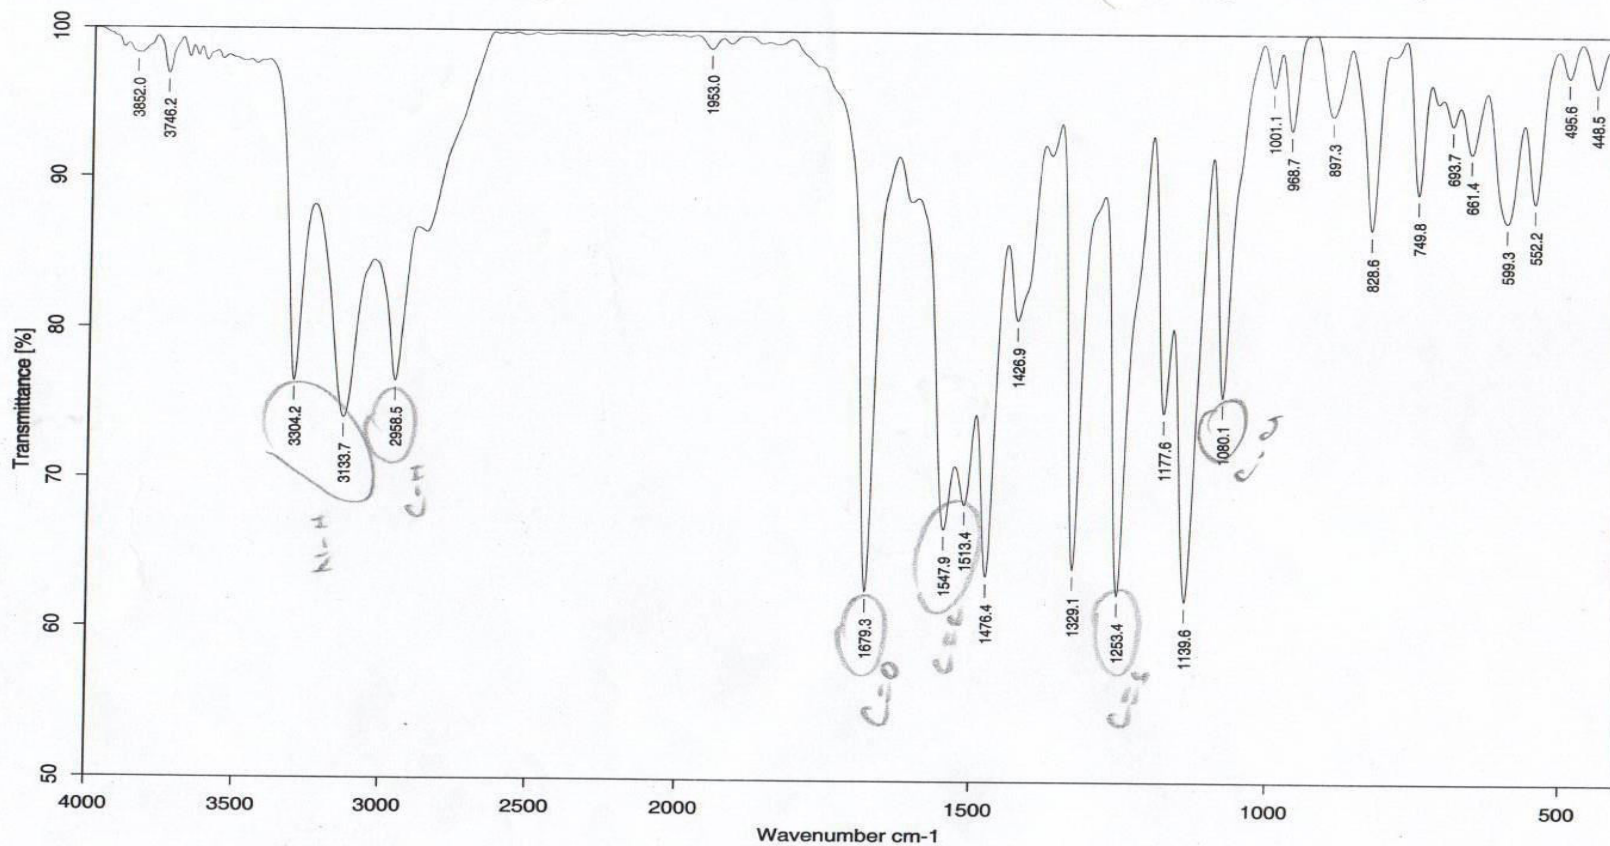

|                                   |                                            |
|-----------------------------------|--------------------------------------------|
| Sample : FZI-ISO6/Fazila Rizvi    | Spectrum : FZ-I-ISO6.0 ( in D:\IRSTUDENT ) |
| Measured : 19/04/2017 on VECTOR22 | Technic : Solid                            |
| Resolution : 4 cm-1 ( 10 scans )  | Analyst : MA/ZA/JS                         |

10.923  
 10.142  
 10.022  
 8.785  
 8.771  
 7.995  
 7.871  
 7.847  
 7.689  
 7.668

FAZILA/DR.HINA/FZ.I.ISO.14 / 2000 / 18016  
 ICCBS, U.O.K/1H/.

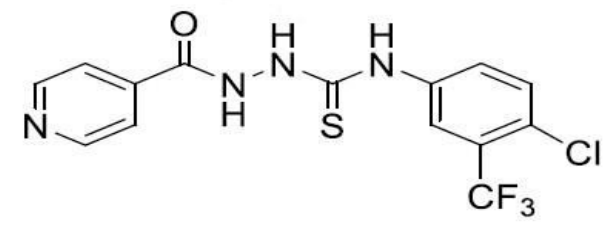

Compound 9

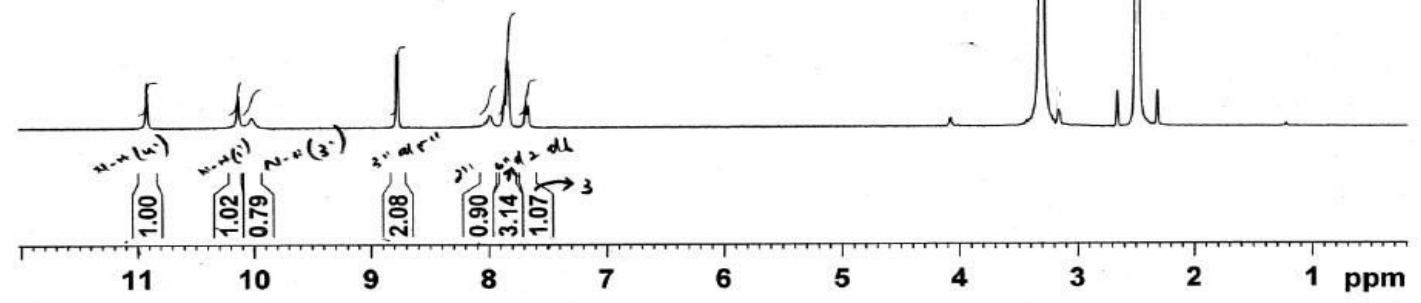

AVANCE AV-400 MHz  
 Lab # 115

```

NAME          sep07-16
EXPNO         1
PROCNO        1
Date_         20160907
Time          12.09
INSTRUM       spect
PROBHD        5 mm SEI 1H-13
PULPROG       zg30
TD            65536
SOLVENT       DMSO
NS            128
DS            0
SWH           8012.820 Hz
FIDRES        0.122266 Hz
AQ            4.0894966 sec
RG            322.5
DW            62.400 usec
DE            6.50 usec
TE            300.0 K
D1            1.50000000 sec
TD0           1

===== CHANNEL f1 =====
NUC1          1H
P1            10.80 usec
PL1           3.00 dB
SFO1          400.0332002 MHz
SI            32768
SF            400.0300042 MHz
WDW           EM
SSB           0
LB            0.30 Hz
GB            0
PC            0.20
  
```

—10.5.  
—10.142  
—10.022  
FAZILA/DR.HINA/FZ.I.ISO.14  
ICCBS,U.O.K/1H/.

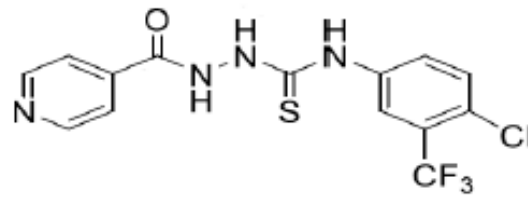

Compound 9

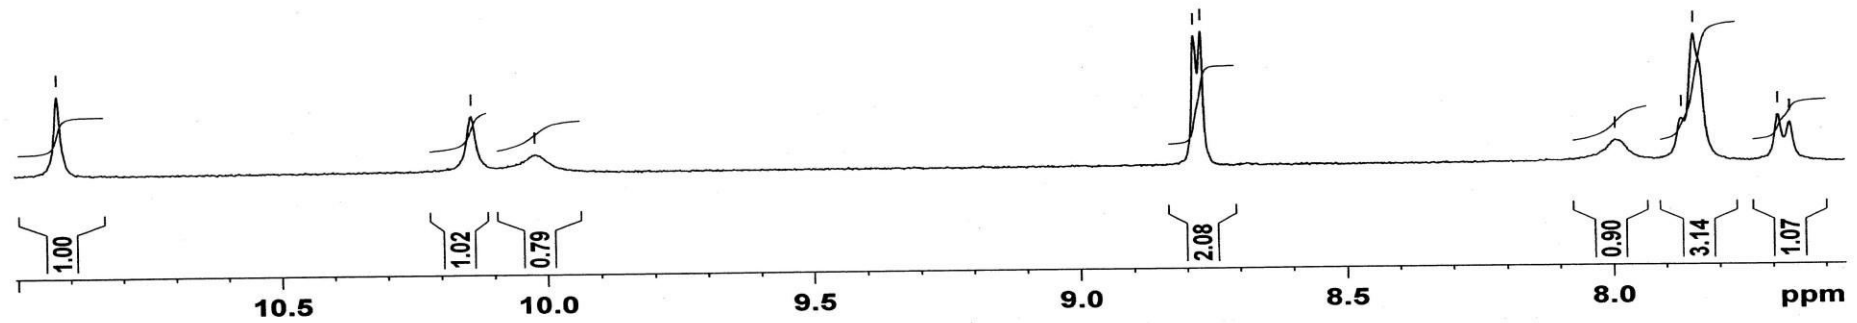

—10.5.  
—10.142  
—10.022  
8.785  
8.771  
7.995  
7.871  
7.847  
7.689  
7.668

File: FZ-I-ISO-14  
Sample: FAZILA RIZVI /DR. HINA  
Instrument: JEOL-600H-2  
Inlet: Direct Probe

Date Run: 09-07-2016 (Time Run: 15:27:11)

Ionization mode: FAB-

Scan: 3

R.T.: .18

#Ions: 954

Base: m/z 373; 100%FS TIC: 10685212

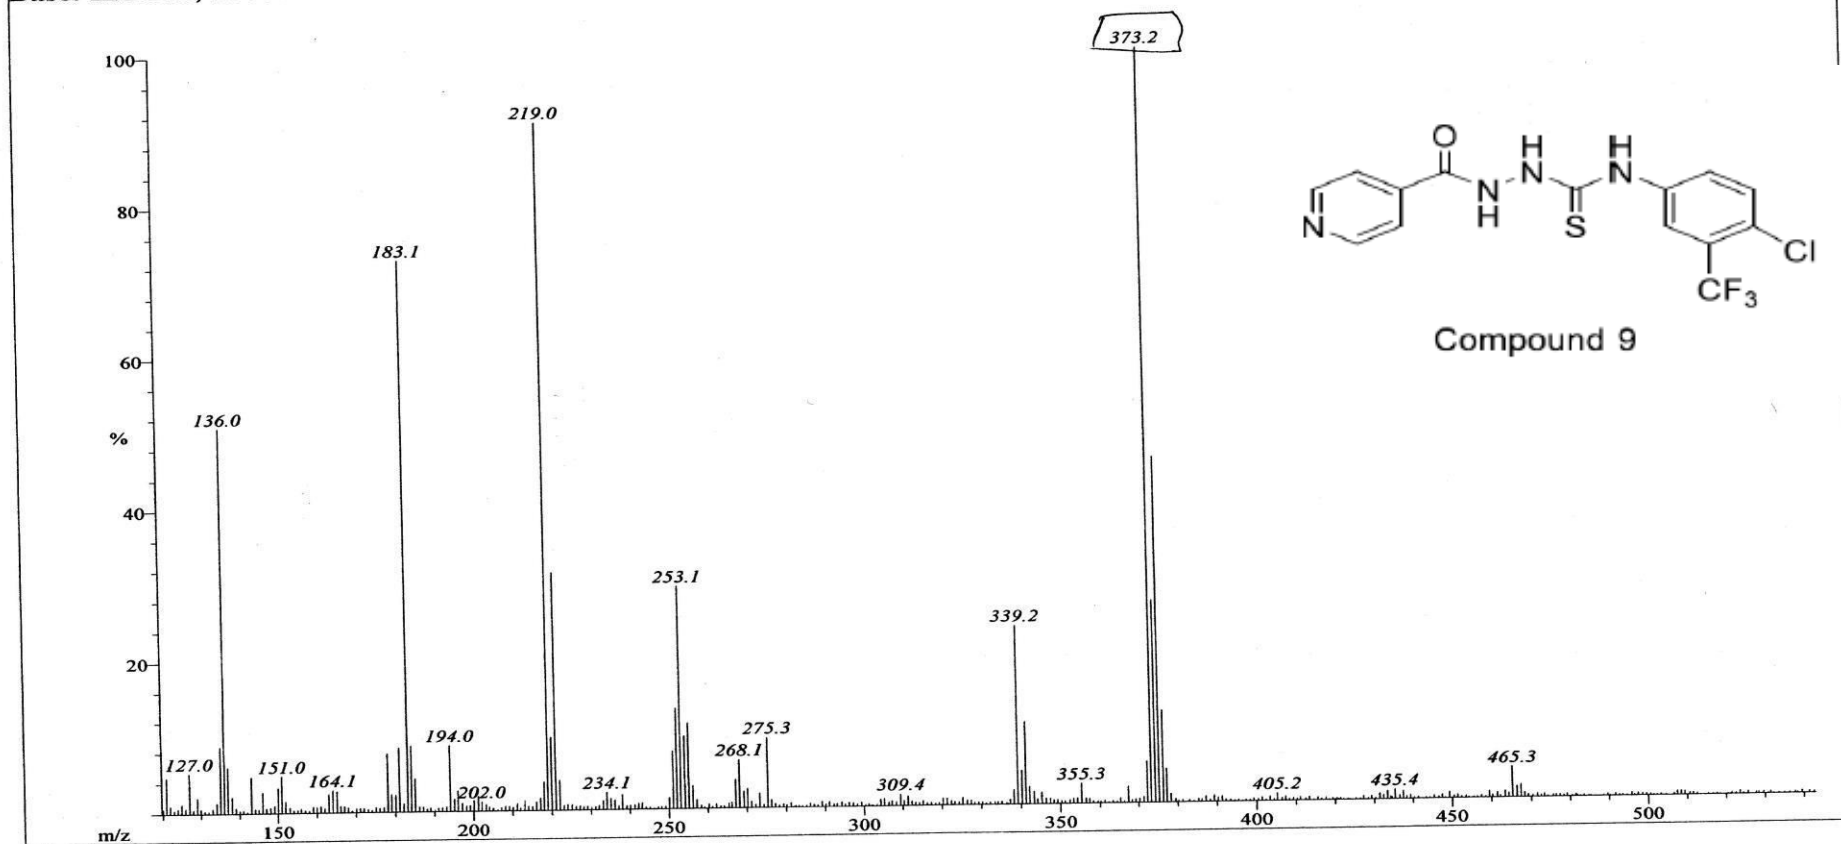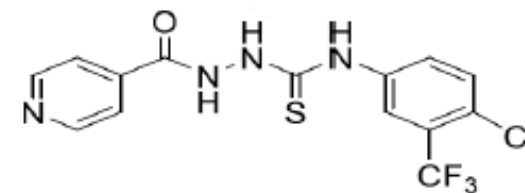

Compound 9

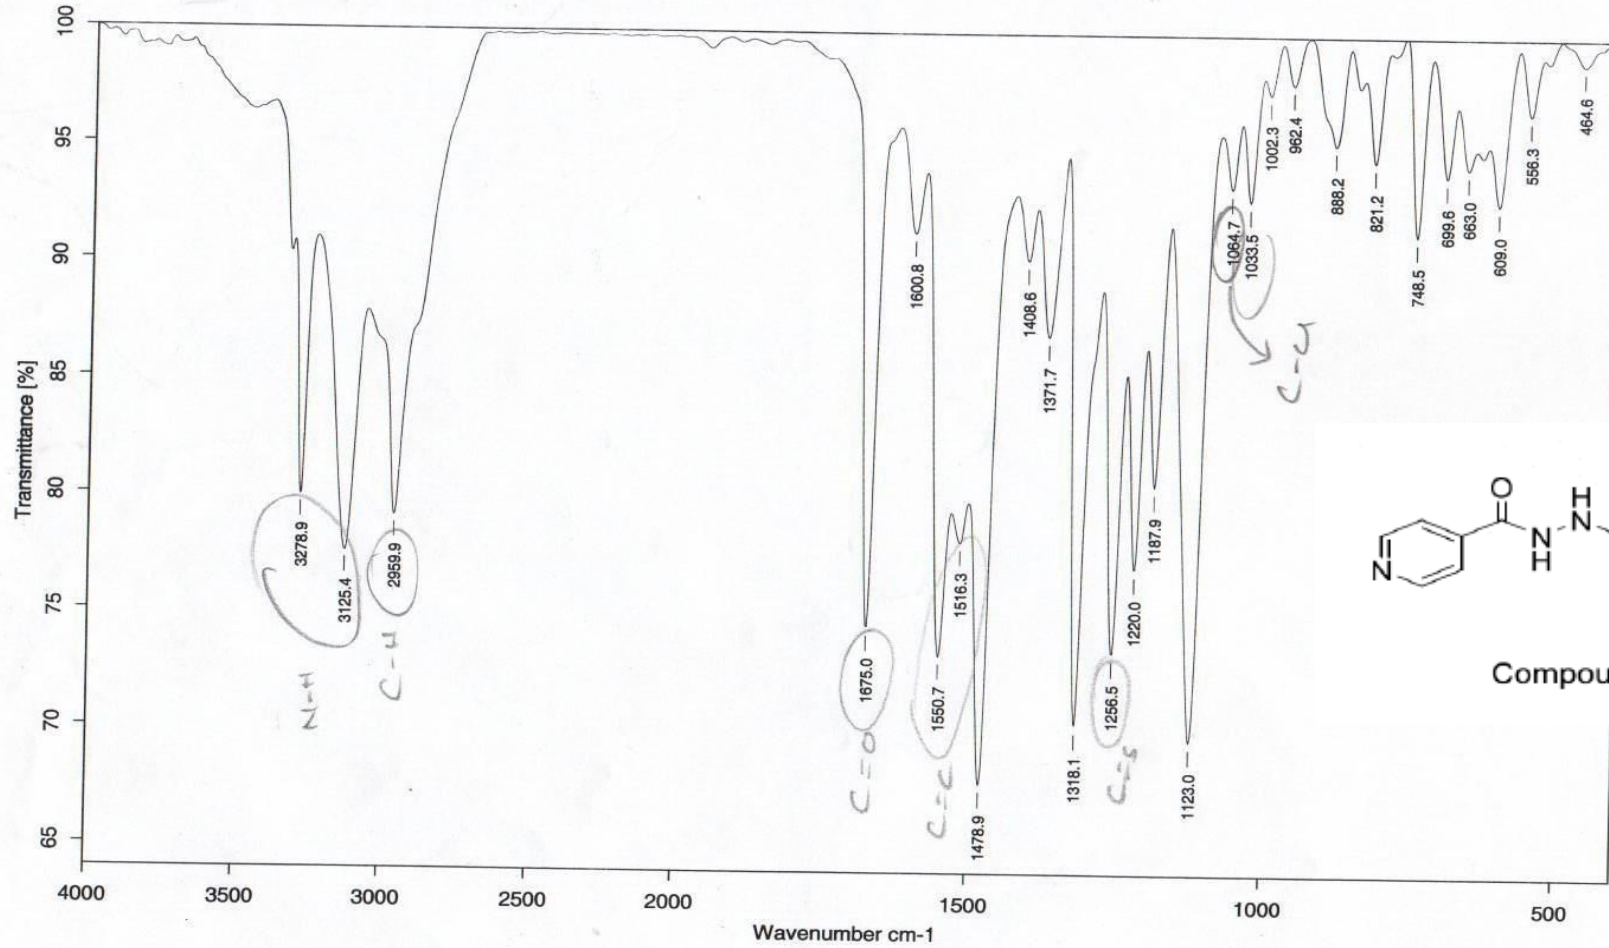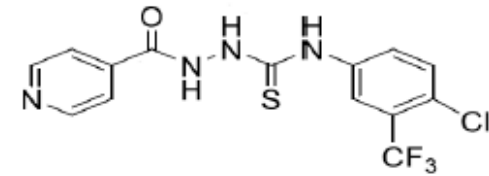

Compound 9

Sample : FZI-ISO14/Fazila Rizvi

Measured : 19/04/2017 on VECTOR22

Resolution : 4 cm<sup>-1</sup> ( 10 scans )

Spectrum : FZI-ISO14.0 ( in D:IRSTUDENT )

Technic : Solid

Analyst : MA/ZA/JS

FAZILA/DR.HINA/FZ-I-1SO14/DMSO  
BB

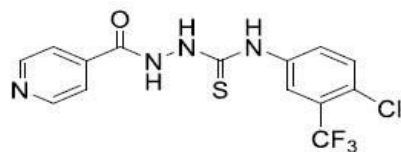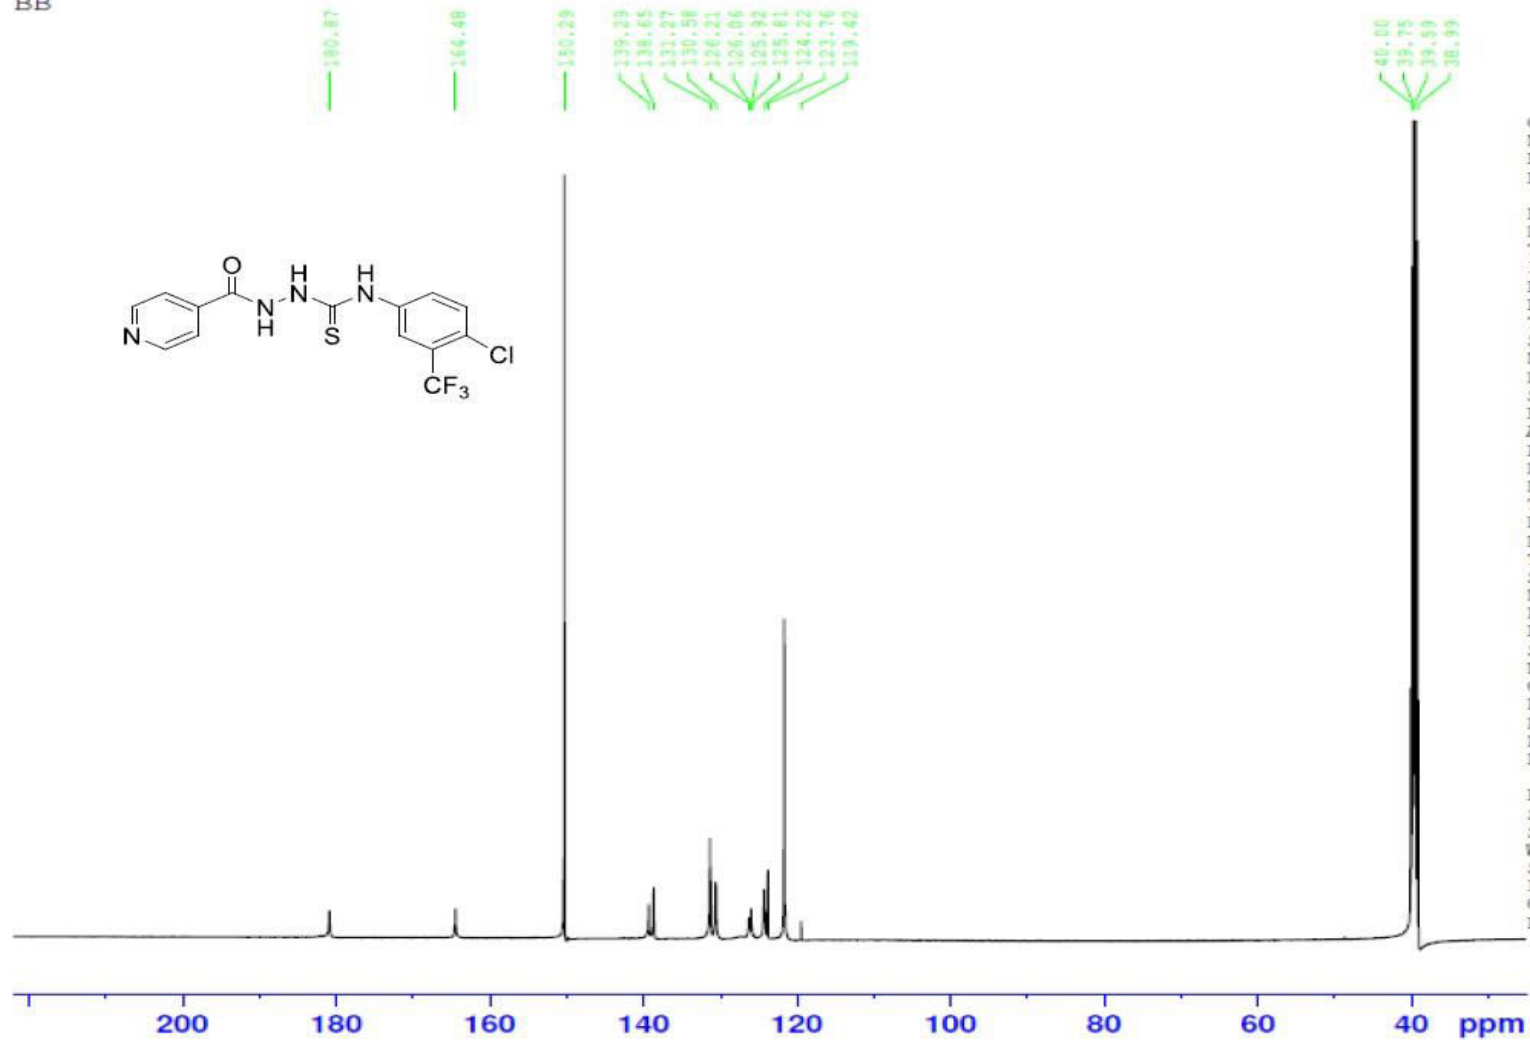

Current Data Parameters  
NAME ISO 14 NMR  
EXPNO 5  
PROCNO 1

F2 - Acquisition Parameters  
Date\_ 20190205  
Time 3.55 h  
INSTRUM Avance Neo 500  
PROBHD Z44862\_0021 (C  
PULPROG zgpg  
TD 32768  
SOLVENT DMSO  
NS 16384  
DS 8  
SWH 30120.482 Hz  
FIDRES 1.838408 Hz  
AQ 0.5439488 sec  
RG 101  
DW 16.600 usec  
DE 20.00 usec  
TE 298.0 K  
D1 2.00000000 sec  
D11 0.03000000 sec  
TDO 16  
SFO1 125.8227986 MHz  
NUC1 13C  
P1 10.00 usec  
PLW1 26.46199989 W  
SFO2 500.3320013 MHz  
NUC2 1H  
CPDPRG[2] waltz65  
PCPD2 80.00 usec  
PLW2 9.74149990 W  
PLW12 0.34246999 W  
PLW13 0.17199001 W

F2 - Processing parameters  
SI 16384  
SF 125.8081399 MHz  
WDW EM  
SSB 0  
LB 1.00 Hz  
GB 0  
PC 1.40

FAZILA/DR.HINA/FZ-I-1SO14/DMSO  
DEPT135

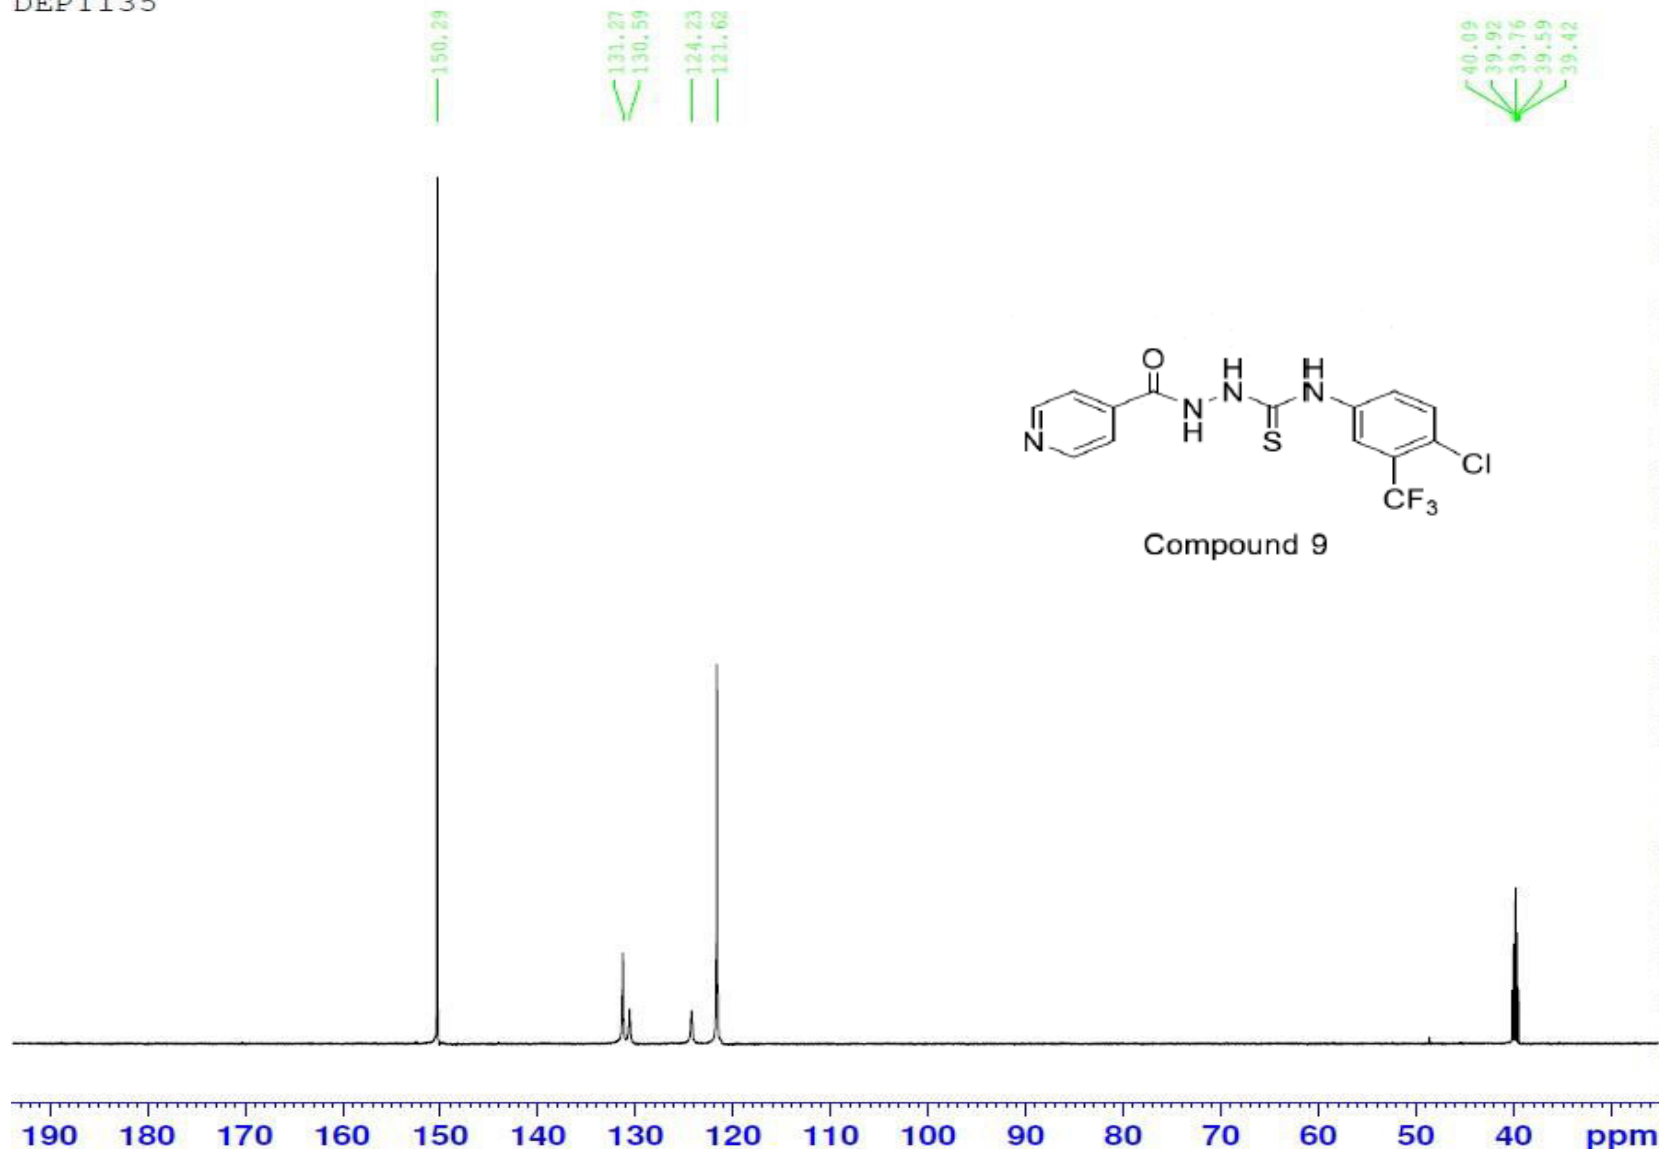

Current Data Parameters  
NAME ISO 14 NMR  
EXPNO 6  
PROCNO 1

F2 - Acquisition Parameters

Date\_ 20190205  
Time 8.56 h  
INSTRUM Avance Neo 500  
PROBHD Z44862\_0021 (C  
PULPROG deptsp135  
TD 32768  
SOLVENT DMSO  
NS 8192  
DS 8  
SWH 25000.000 Hz  
FIDRES 1.525879 Hz  
AQ 0.6553600 sec  
RG 101  
DW 20.000 usec  
DE 20.00 usec  
TE 298.0 K  
CNST2 145.0000000  
D1 1.50000000 sec  
D2 0.00344828 sec  
D12 0.00002000 sec  
TD0 8  
SFO1 125.8200303 MHz  
NUC1 13C  
P1 10.00 usec  
P13 2000.00 usec  
PLW0 0 W  
PLW1 26.46199989 W  
SPNAM[5] Crp60comp.4  
SPOAL5 0.500  
SPOFFS5 0 Hz  
SPW5 4.04309988 W  
SFO2 500.3320013 MHz  
NUC2 1H  
CPDPRG[2] waltz65  
P3 15.00 usec  
P4 30.00 usec  
PCPD2 80.00 usec  
PLW2 9.74149990 W  
PLW12 0.34246999 W

F2 - Processing parameters

SI 16384  
SF 125.8081395 MHz  
WDW EM  
SSB 0  
LB 1.00 Hz  
GB 0  
PC 1.40

FZILA/DR.HINA/FZ.I.ISO.10/CD3OD  
1H/.

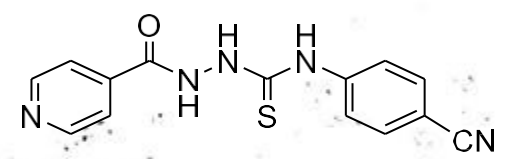

Compound 10

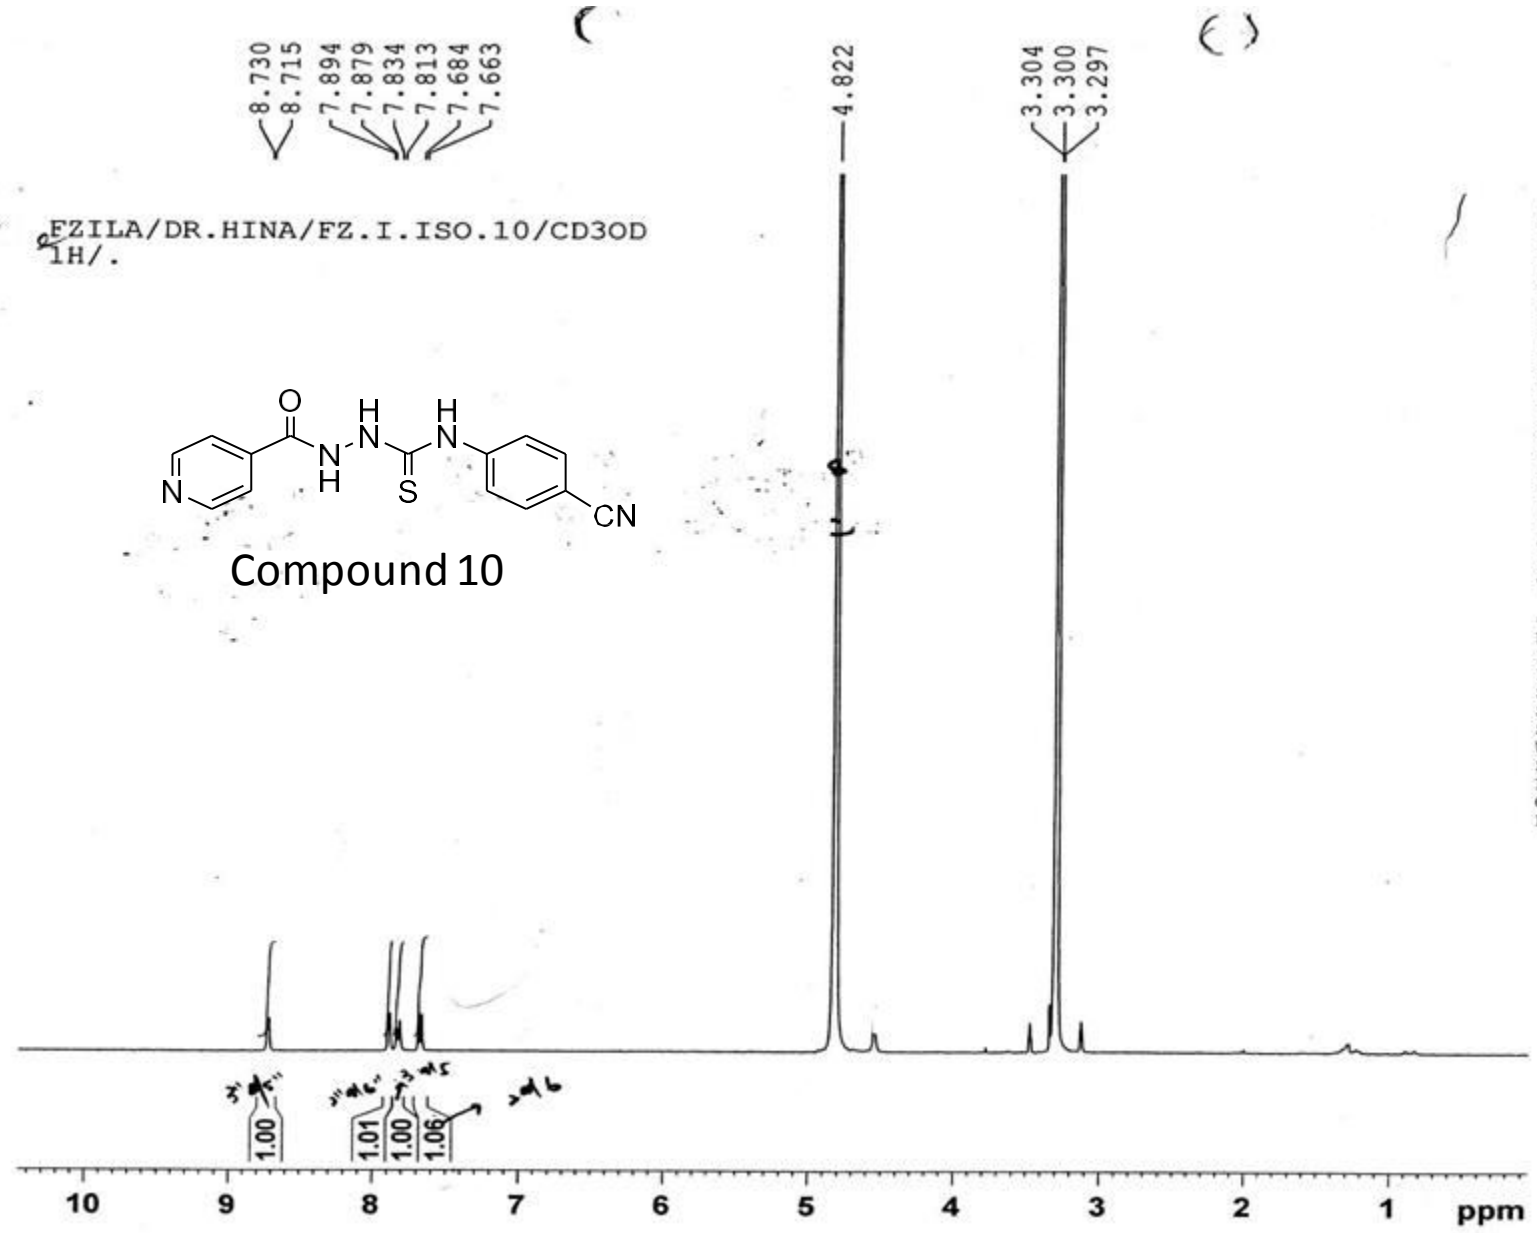

AVANCE AV-400 MHz  
Lab # 115

NAME june08-16  
EXPNO 1  
PROCNO 1  
Date\_ 20160608  
Time\_ 13.12  
INSTRUM spect  
PROBHD 5 mm SEI 1H-13  
PULPROG zg30  
TD 65536  
SOLVENT MeOD  
NS 128  
DS 0  
SWH 8012.820 Hz  
FIDRES 0.122266 Hz  
AQ 4.0894966 sec  
RG 574.7  
DW 62.400 usec  
DE 6.50 usec  
TE 300.0 K  
D1 1.50000000 sec  
TDO 1

----- CHANNEL f1 -----  
NUC1 1H  
P1 10.80 usec  
PL1 3.00 dB  
SFO1 400.0332002 MHz  
SI 32768  
SF 400.0300087 MHz  
WDW EM  
SSB 0  
LB 0.30 Hz  
GB 0  
PC 0.20



8.730  
8.715

7.894  
7.879

7.834  
7.813

7.684  
7.663

FZILA/DR.HINA/FZ.I.ISO.10/CD3OD  
1H/.

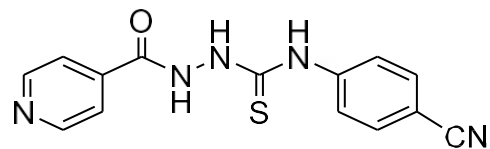

Compound 10

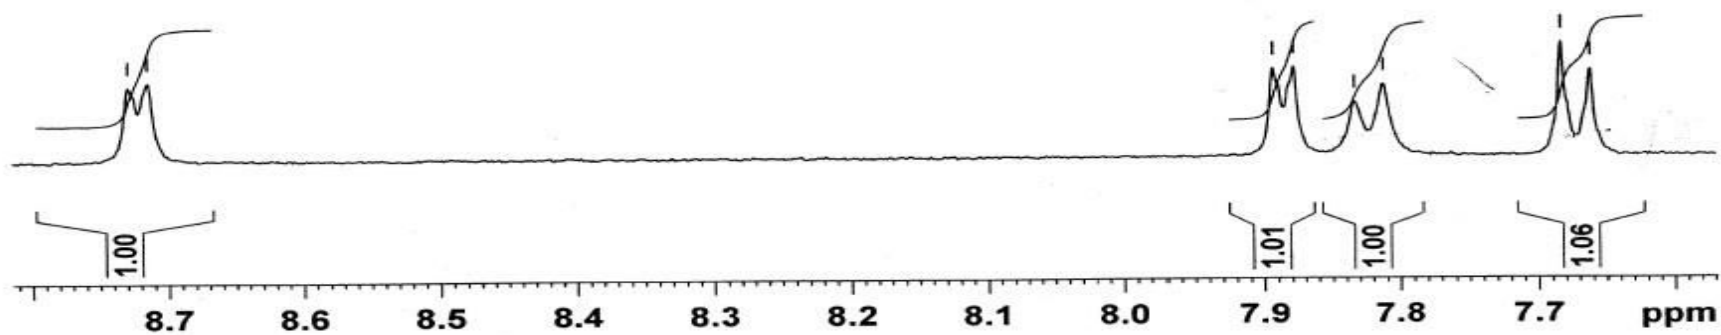

File: FZ-I-ISO10-FABP  
Sample: FAZILA /DR. HINA  
Instrument: JEOL-600H-2  
Inlet: Direct Probe

Date Run: 06-09-2016 (Time Run: 12:40:22)

Ionization mode: FAB+

Scan: 11  
Base: m/z 185; 36.5%FS TIC: 1004100

R.T.: .88

#Ions: 542

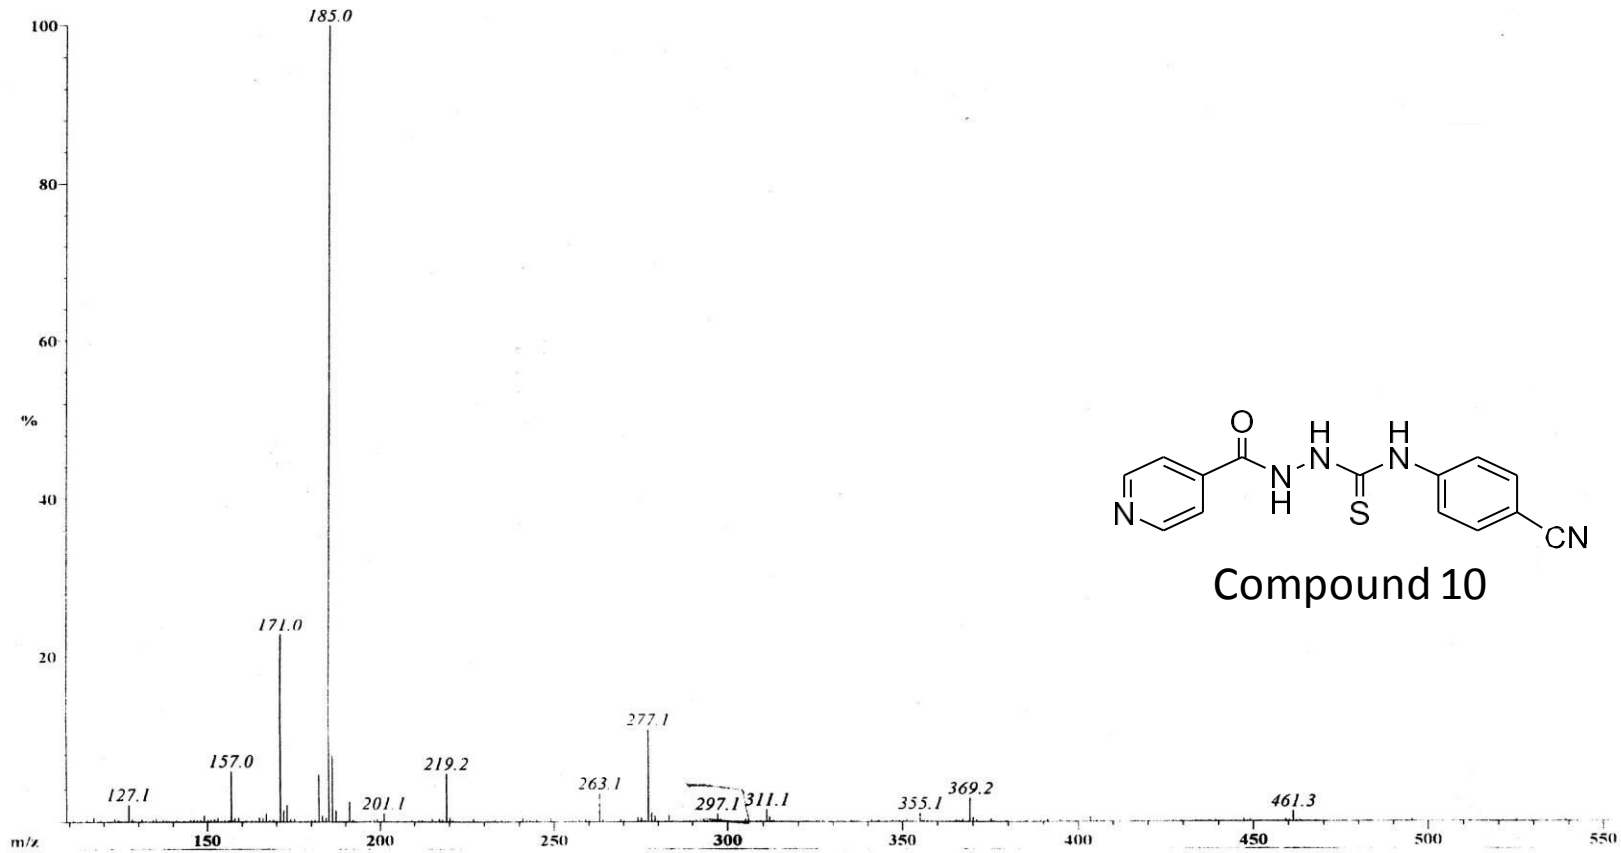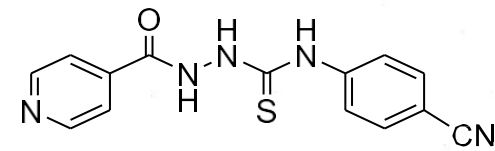

Compound 10

cal

Fazila / Dr. Hina / FZ-I-ISO-10 / DMSO  
BB

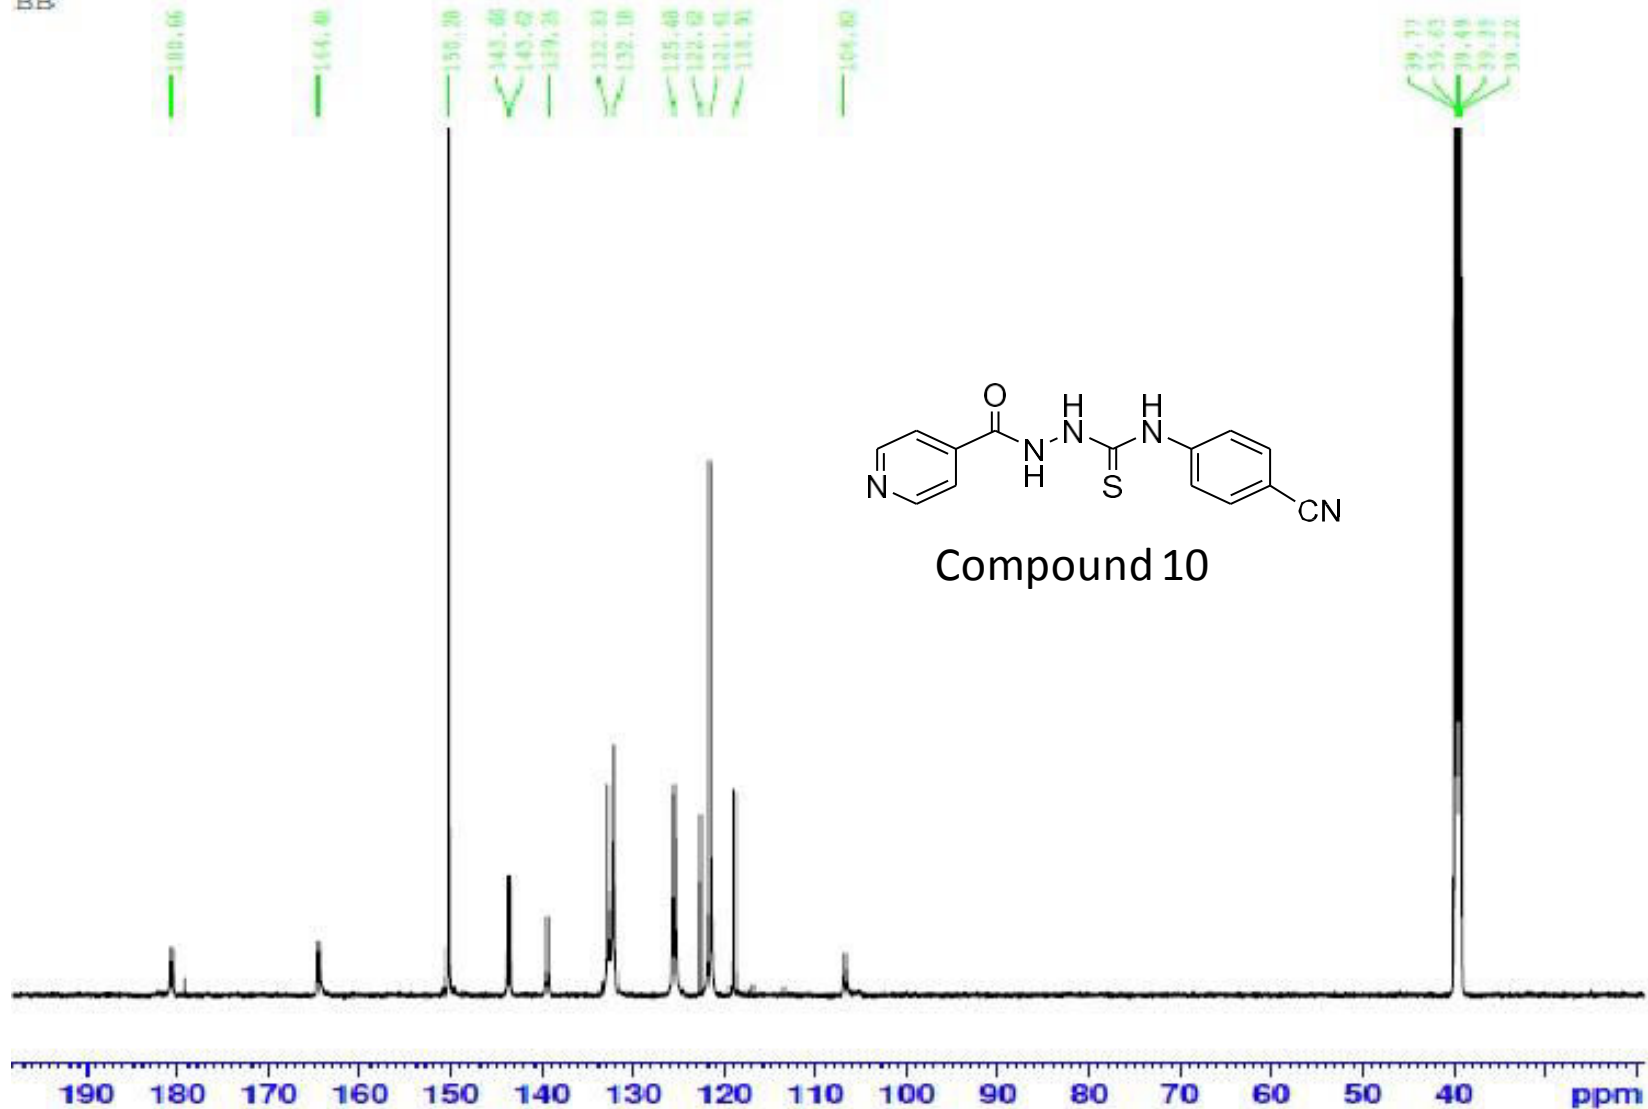

Current Data Parameters  
NAME ISO 10  
EXPNO 4  
PROCNO 1

F2 - Acquisition Parameters  
Date\_ 20190207  
Time 14.14 h  
INSTRUM AVNeo\_600  
PROBHD Z117768\_0039 (1  
PULPROG zgpg  
TD 32768  
SOLVENT DMSO  
NS 6606  
DS 4  
SWH 35714.285 Hz  
FIDRES 2.179827 Hz  
AQ 0.4587520 sec  
RG 101  
DW 14.000 usec  
DE 18.00 usec  
TE 298.0 K  
D1 1.50000000 sec  
D11 0.03000000 sec  
ID0 8  
SFO1 150.9553694 MHz  
NUC1 13C  
P1 12.00 usec  
PLW1 107.76000214 W  
SFO2 600.2724011 MHz  
NUC2 1H  
CPDPRG[2] waltz45  
PCPD2 70.00 usec  
PLW2 9.53950024 W  
PLW12 0.12460000 W  
PLW13 0.06267200 W

F2 - Processing parameters  
SI 16384  
SF 150.9380853 MHz  
WDW EM  
SSB 0  
LB 1.00 Hz  
GB 0  
PC 1.40

Fazila / Dr. Hina / FZ-I-ISO-10 / DMSO  
DEPT135

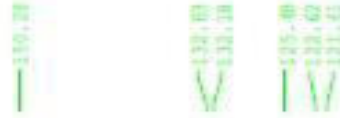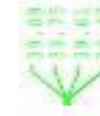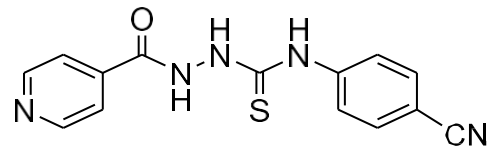

Compound 10

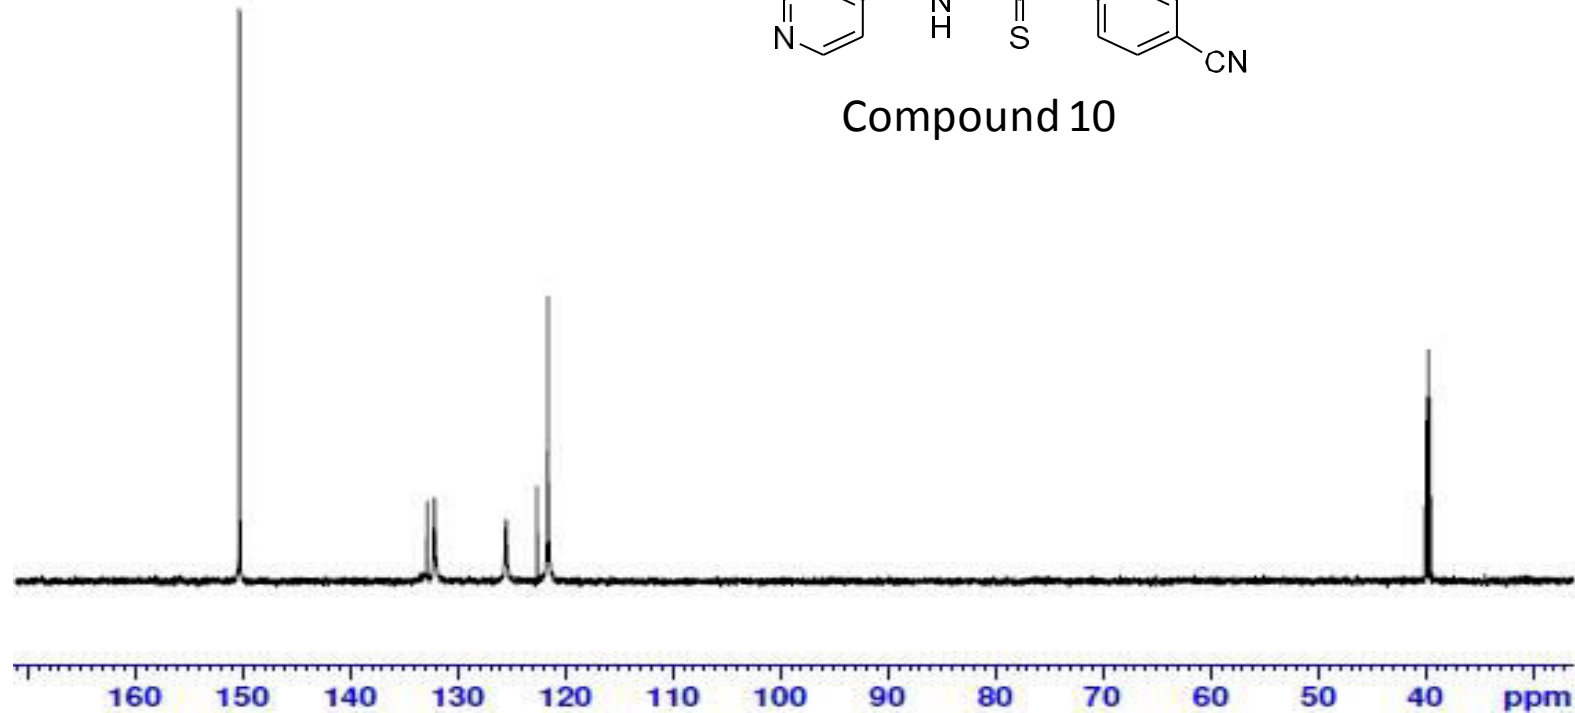

```
NAME          ISO 10
EXPNO          5
PROCNO         1

F2 - Acquisition Parameters
Date_          20190207
Time           15.26 h
INSTRUM       AVNeo_600
PROBHD        Z117768_0039 (
PULPROG       deptspl35
ID            32768
SOLVENT       DMSO
NS            2058
DS            8
SWH           30120.482 Hz
FIDRES        1.838408 Hz
AQ            0.5439488 sec
RG            101
DW            16.600 usec
DE            18.00 usec
TE            298.0 K
CNST2         145.0000000
D1            1.50000000 sec
D2            0.00344828 sec
D12           0.00002000 sec
TD0           4
SFO1          150.9523507 MHz
NUC1           13C
P1            12.00 usec
P13           2000.00 usec
PLW0          0 W
PLW1          107.76000214 W
SPNAM[5]      Crp60comp.4
SFOALS        0.500
SPOFFS5       0 Hz
SPW5          23.70800018 W
SFO2          600.2724011 MHz
NUC2           1H
CPDPRG[2]     waltz65
P3            8.00 usec
P4            16.00 usec
PCPD2         70.00 usec
PLW2          9.53950024 W
PLW12         0.12460000 W

F2 - Processing parameters
SI            16384
SF            150.9380853 MHz
WDW           EM
SSB           0
LB            1.00 Hz
GB            0
PC            1.40
```

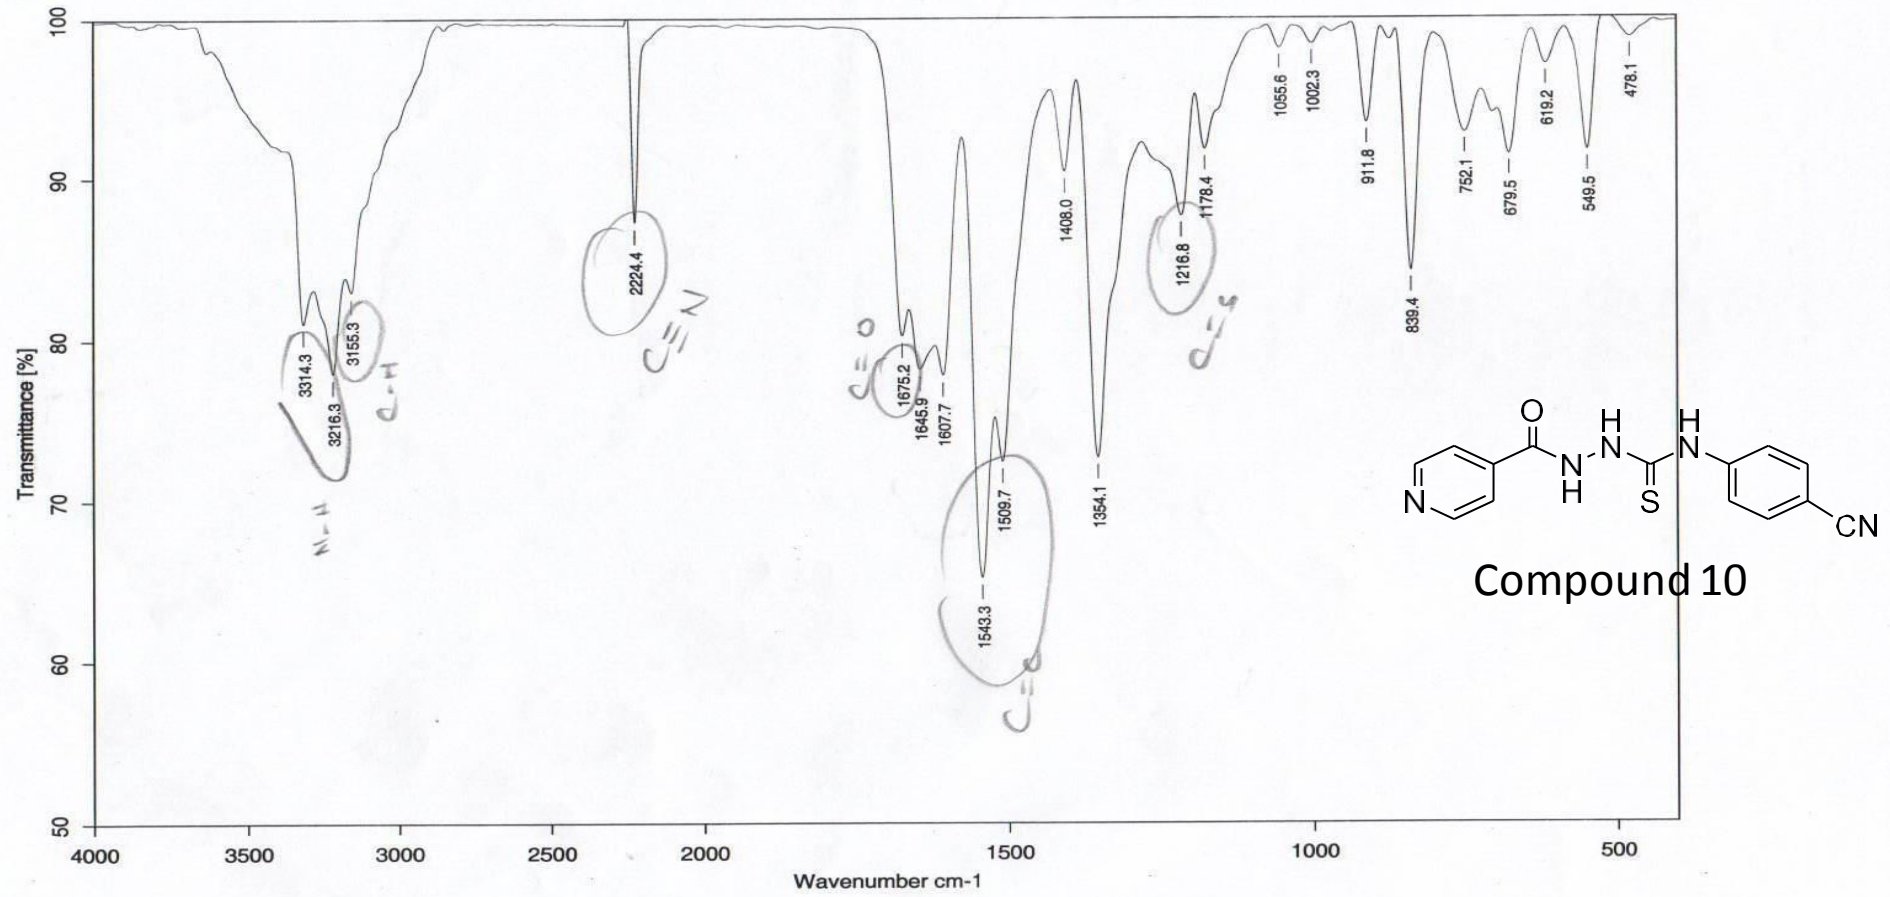

Sample : FZI-ISO10/Fazila Rizvi  
Measured : 19/04/2017 on VECTOR22  
Resolution : 4 cm<sup>-1</sup> ( 10 scans )

Spectrum : FZ-I-ISO10.0 ( in D:\MRSTUDENT )  
Technic : Solid  
Analyst : MA/ZA/JS

AVANCE AV-400 MHz  
Lab # 115

FAZILA/DR.HINA/FZ.I.ISO.15 / *ISO 11*  
ICCBS, U.O.K/1H/.

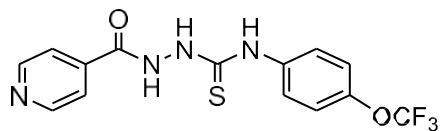

Compound 11

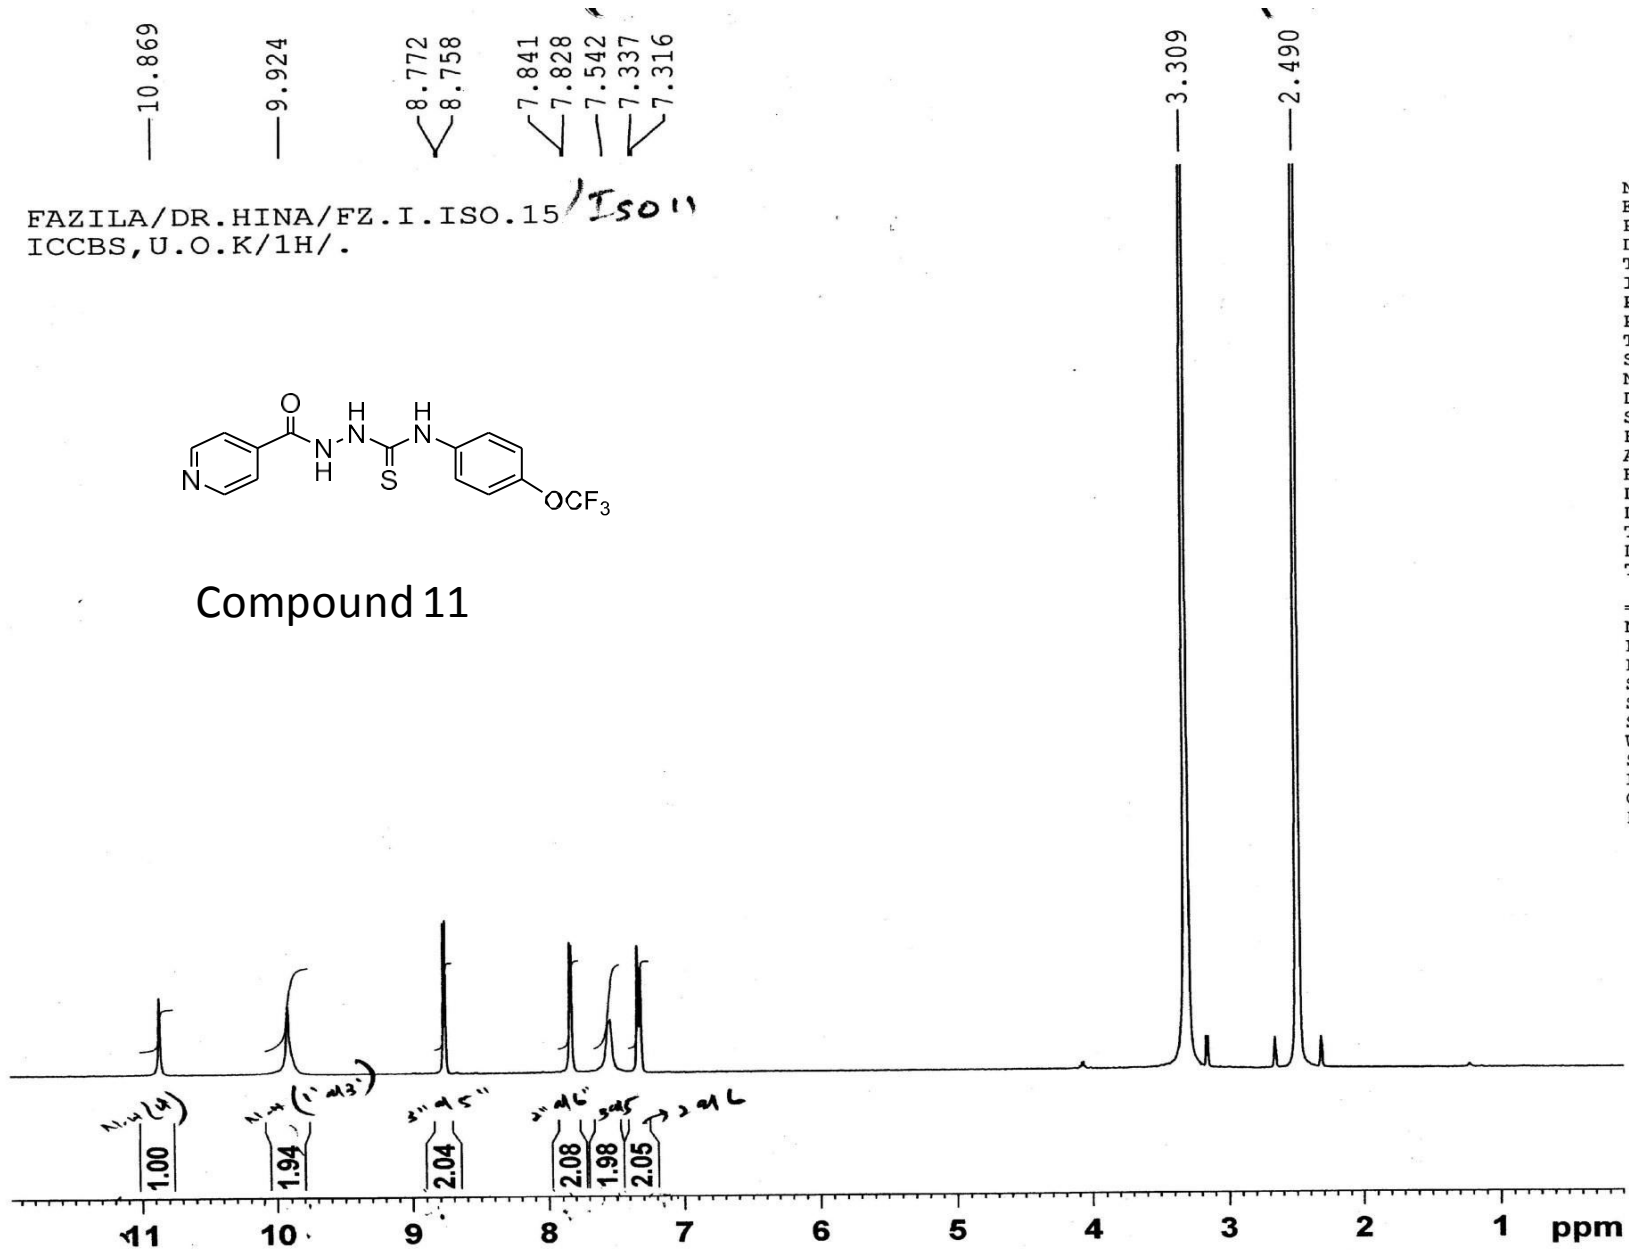

```

NAME          sep07-16
EXPNO         3
PROCNO        1
Date_         20160907
Time_         12.46
INSTRUM       spect
PROBHD        5 mm SEI 1H-13
PULPROG       zg30
TD            65536
SOLVENT       DMSO
NS            128
DS            0
SWH           8012.820 Hz
FIDRES        0.122266 Hz
AQ            4.0894966 sec
RG            322.5
DW            62.400 usec
DE            6.50 usec
TE            300.0 K
D1            1.50000000 sec
TD0           1
  
```

```

===== CHANNEL f1 =====
NUC1          1H
P1            10.80 usec
PL1           3.00 dB
SFO1          400.0332002 MHz
SI            32768
SF            400.0300042 MHz
WDW           EM
SSB           0
LB            0.30 Hz
GB            0
PC            0.20
  
```

—10.869  
—9.924

FAZILA/DR.HINA/FZ.I.ISO.15  
ICCBS,U.O.K/1H/.

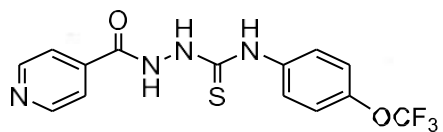

Compound 11

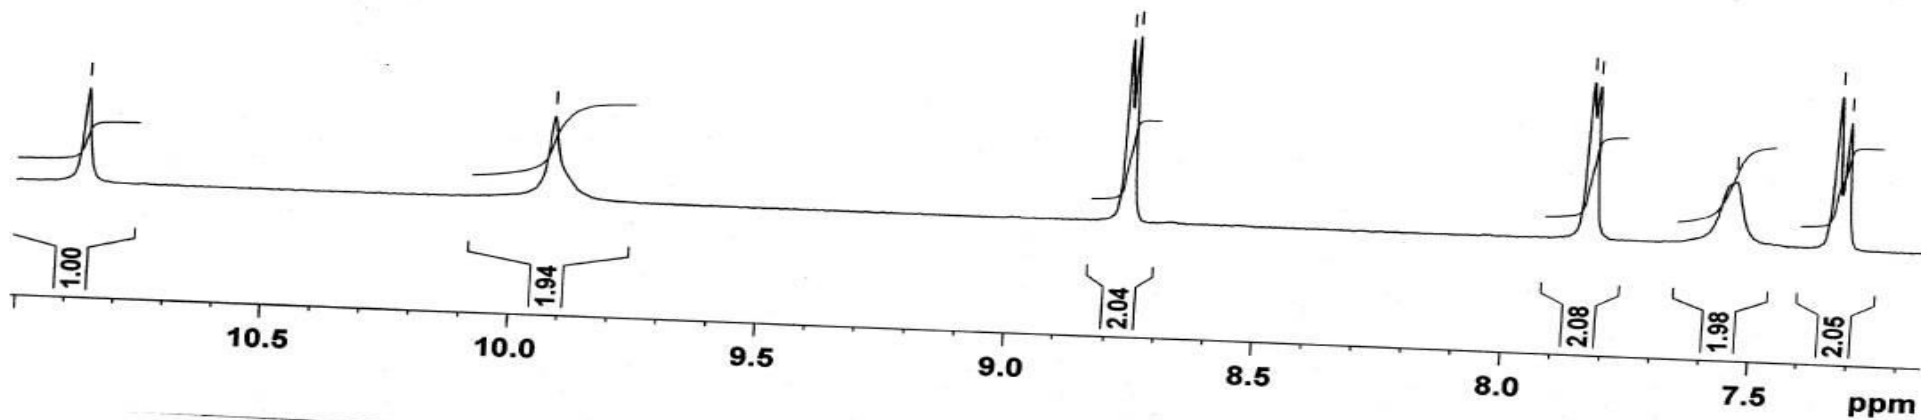

File: FZ-I-ISO15/~~1011~~  
Sample: FAZILA RIZVI /DR. HINA  
Instrument: JEOL-600H-2  
Inlet: Direct Probe

Date Run: 09-07-2016 (Time Run: 14:52:37)

Ionization mode: FAB+

Scan: 4  
Base: m/z 185; 54.4%FS TIC: 3045914

R.T.: .27

#Ions: 243

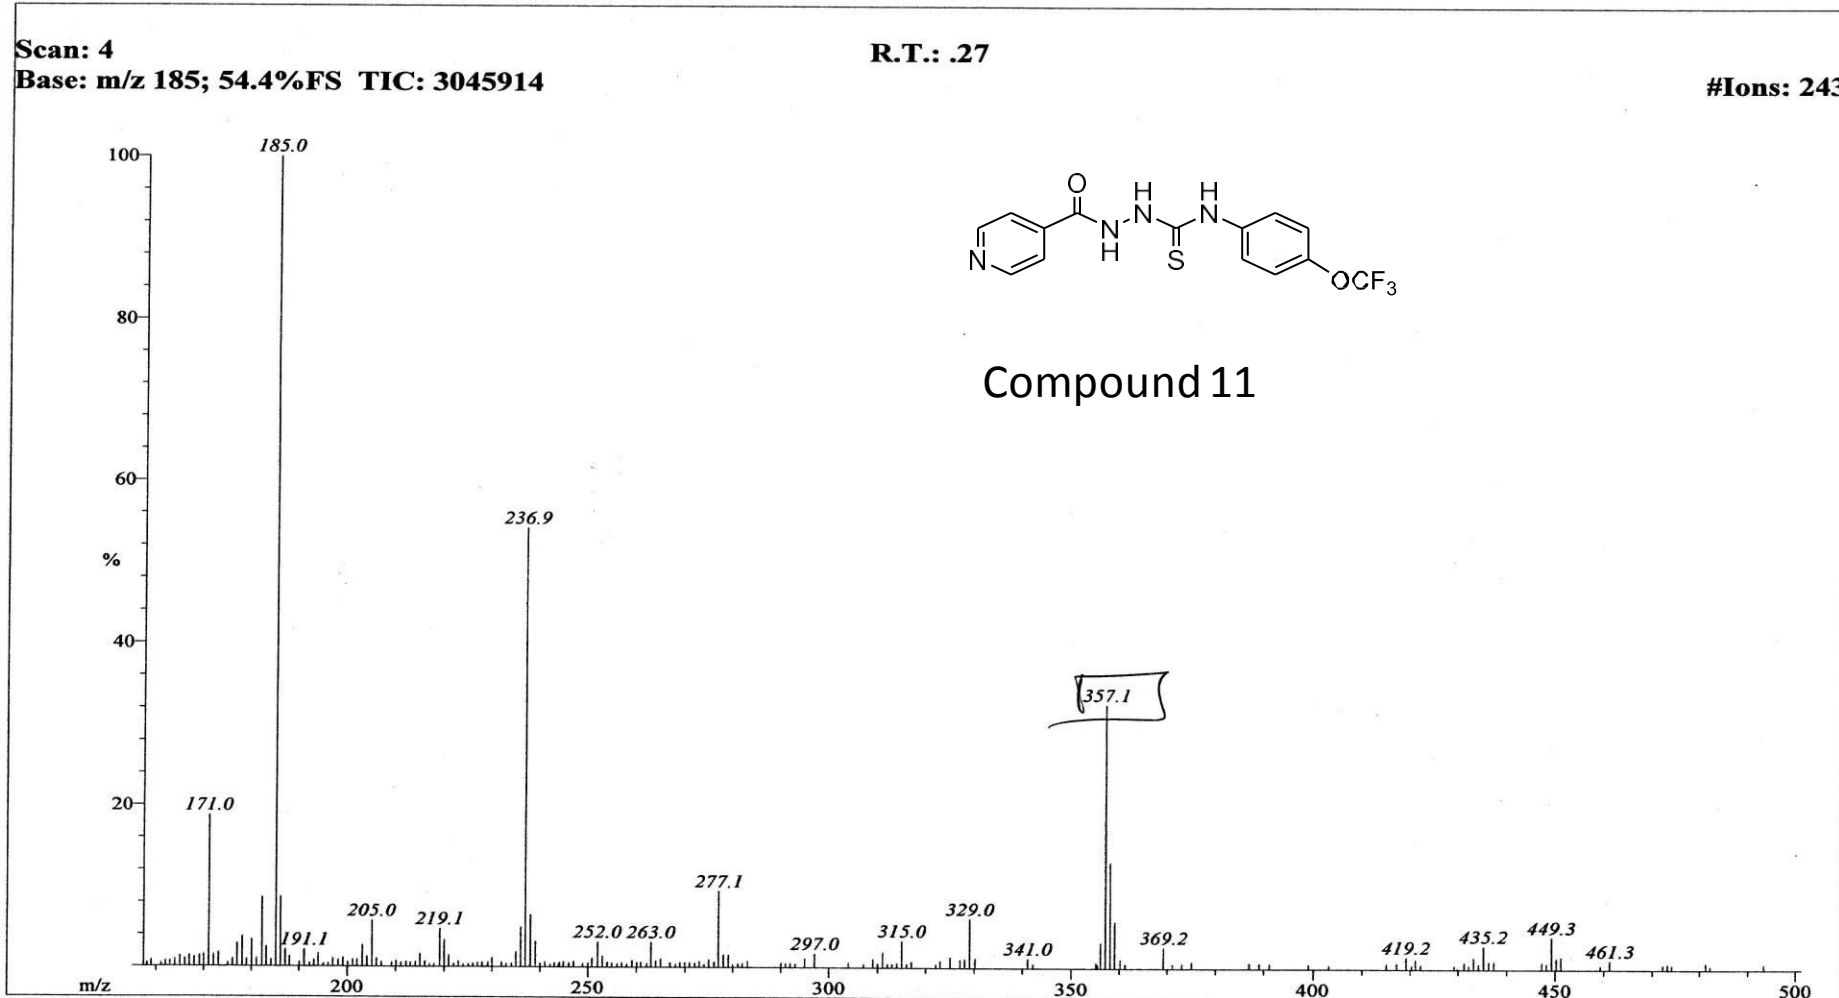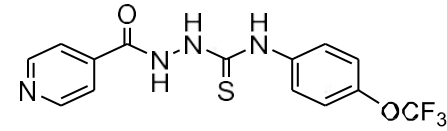

Compound 11



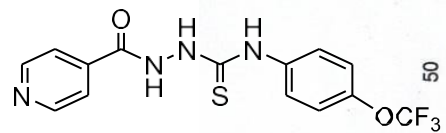

Compound 11

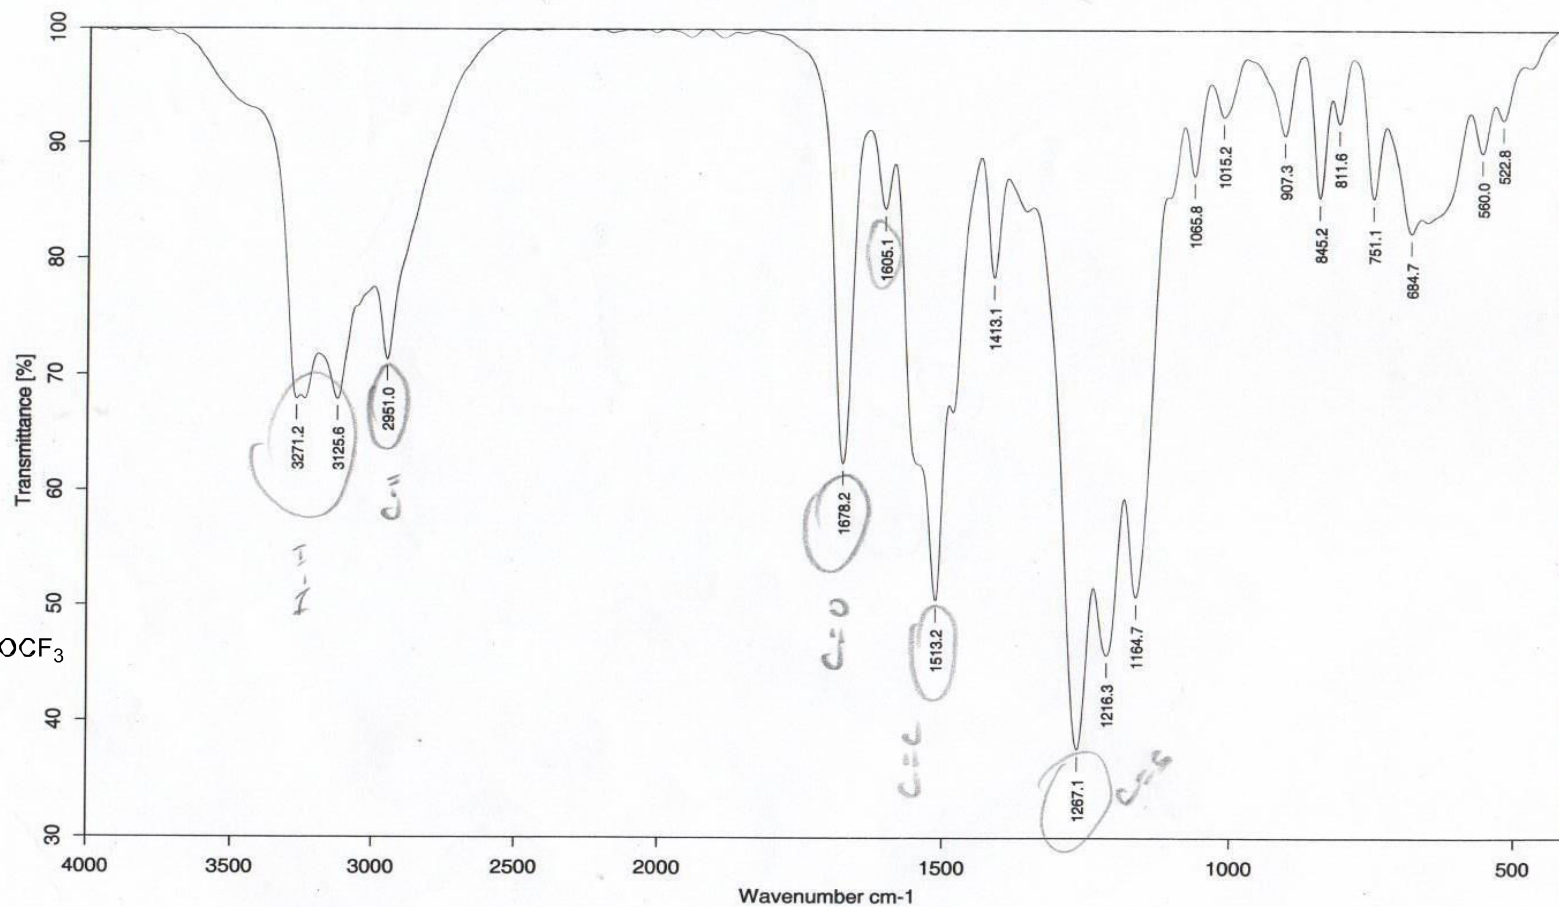

Sample : FZI-ISO11/Fazila Rizvi

Measured : 19/04/2017 on VECTOR22

Resolution : 4 cm<sup>-1</sup> ( 10 scans )

Spectrum : FZ-I-ISO11.0 ( in D:\IRSTUDENT )

Technic : Solid

Analyst : MA/ZA/JS

— 11.061  
— 10.448  
— 9.727  
∨ 8.782  
∨ 8.765  
∨ 7.854  
∨ 7.839

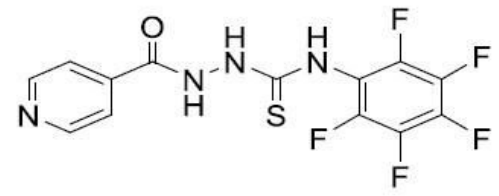

Compound 12

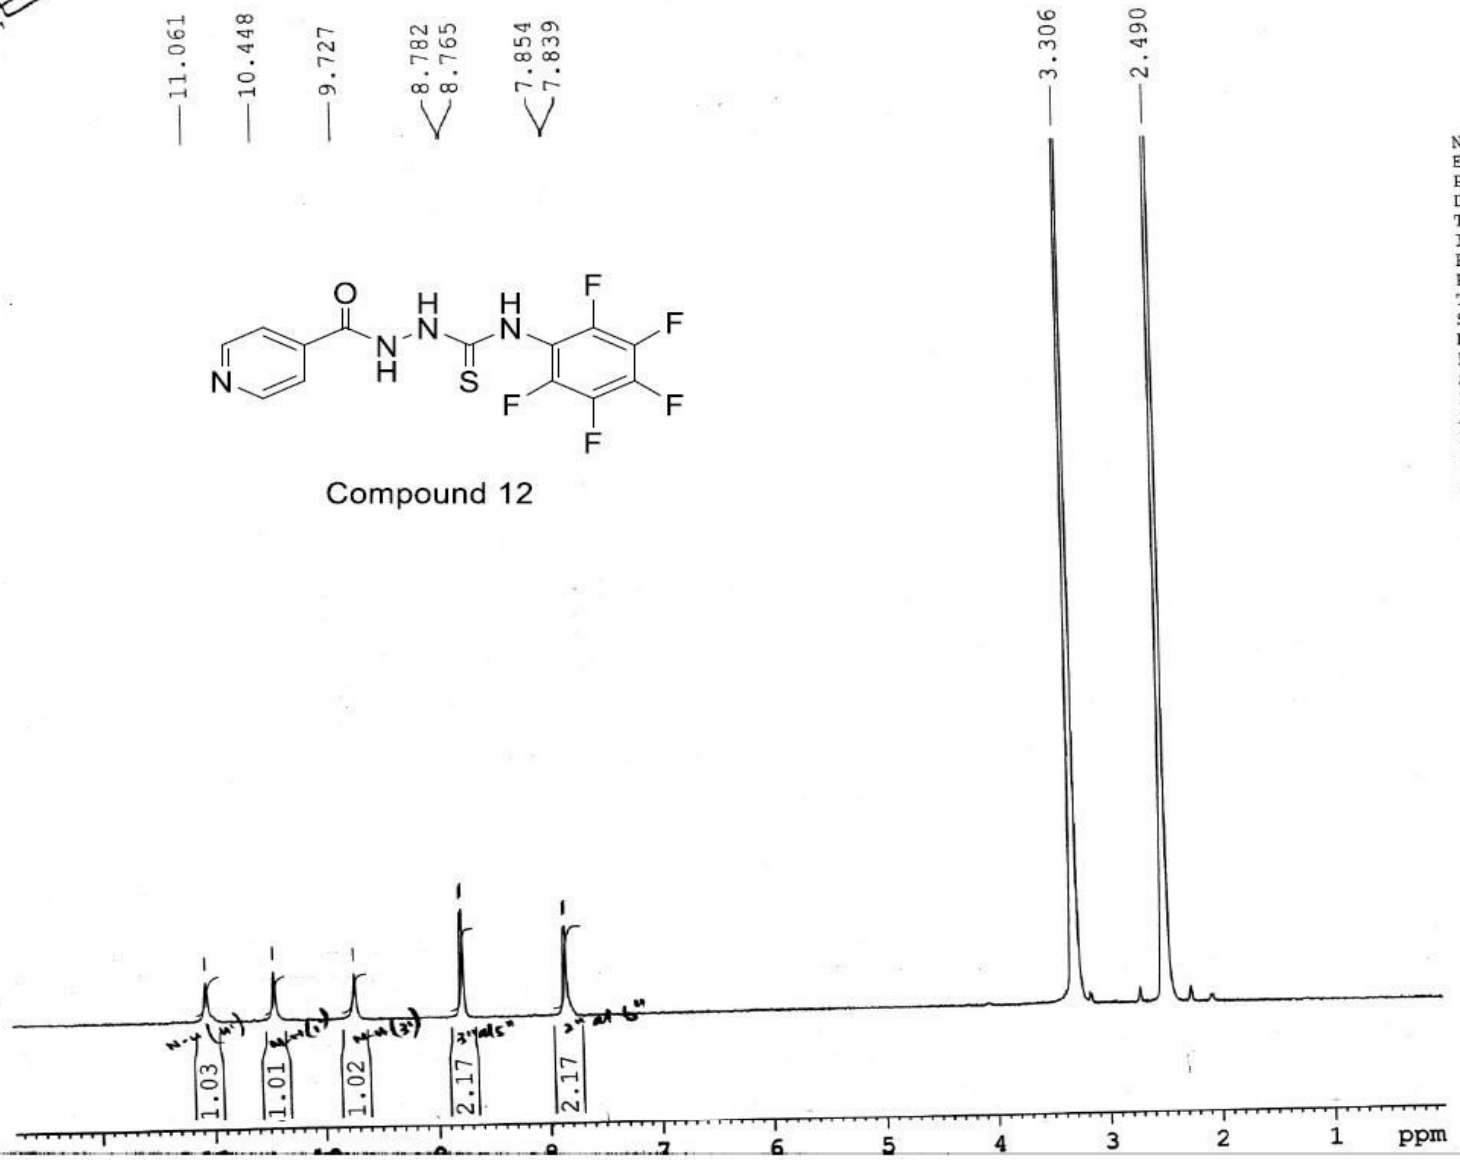

AVANCE AV-300  
LAB NO: 108

NAME Sep26-16  
EXPNO 1  
PROCNO 1  
Date 20160926  
Time 9.30  
INSTRUM spect  
PROBHD 5 mm DUL 13C-1  
PULPROG zg30  
TD 32768  
SOLVENT DMSO  
NS 64  
DS 0  
SWH 5995.204 Hz  
FIDRES 0.182959 Hz  
AQ 2.7329011 sec  
RG 574.7  
DW 83.400 usec  
DE 6.50 usec  
TE 299.0 K  
D1 1.50000000 sec  
TD0 1

===== CHANNEL f1 =====  
NUC1 1H  
P1 12.30 usec  
PL1 4.00 dB  
SFO1 300.1321009 MHz  
SI 16384  
SF 300.1300039 MHz  
WDW EM  
SSB 0  
LB 0.30 Hz  
GB 0  
PC 0.60

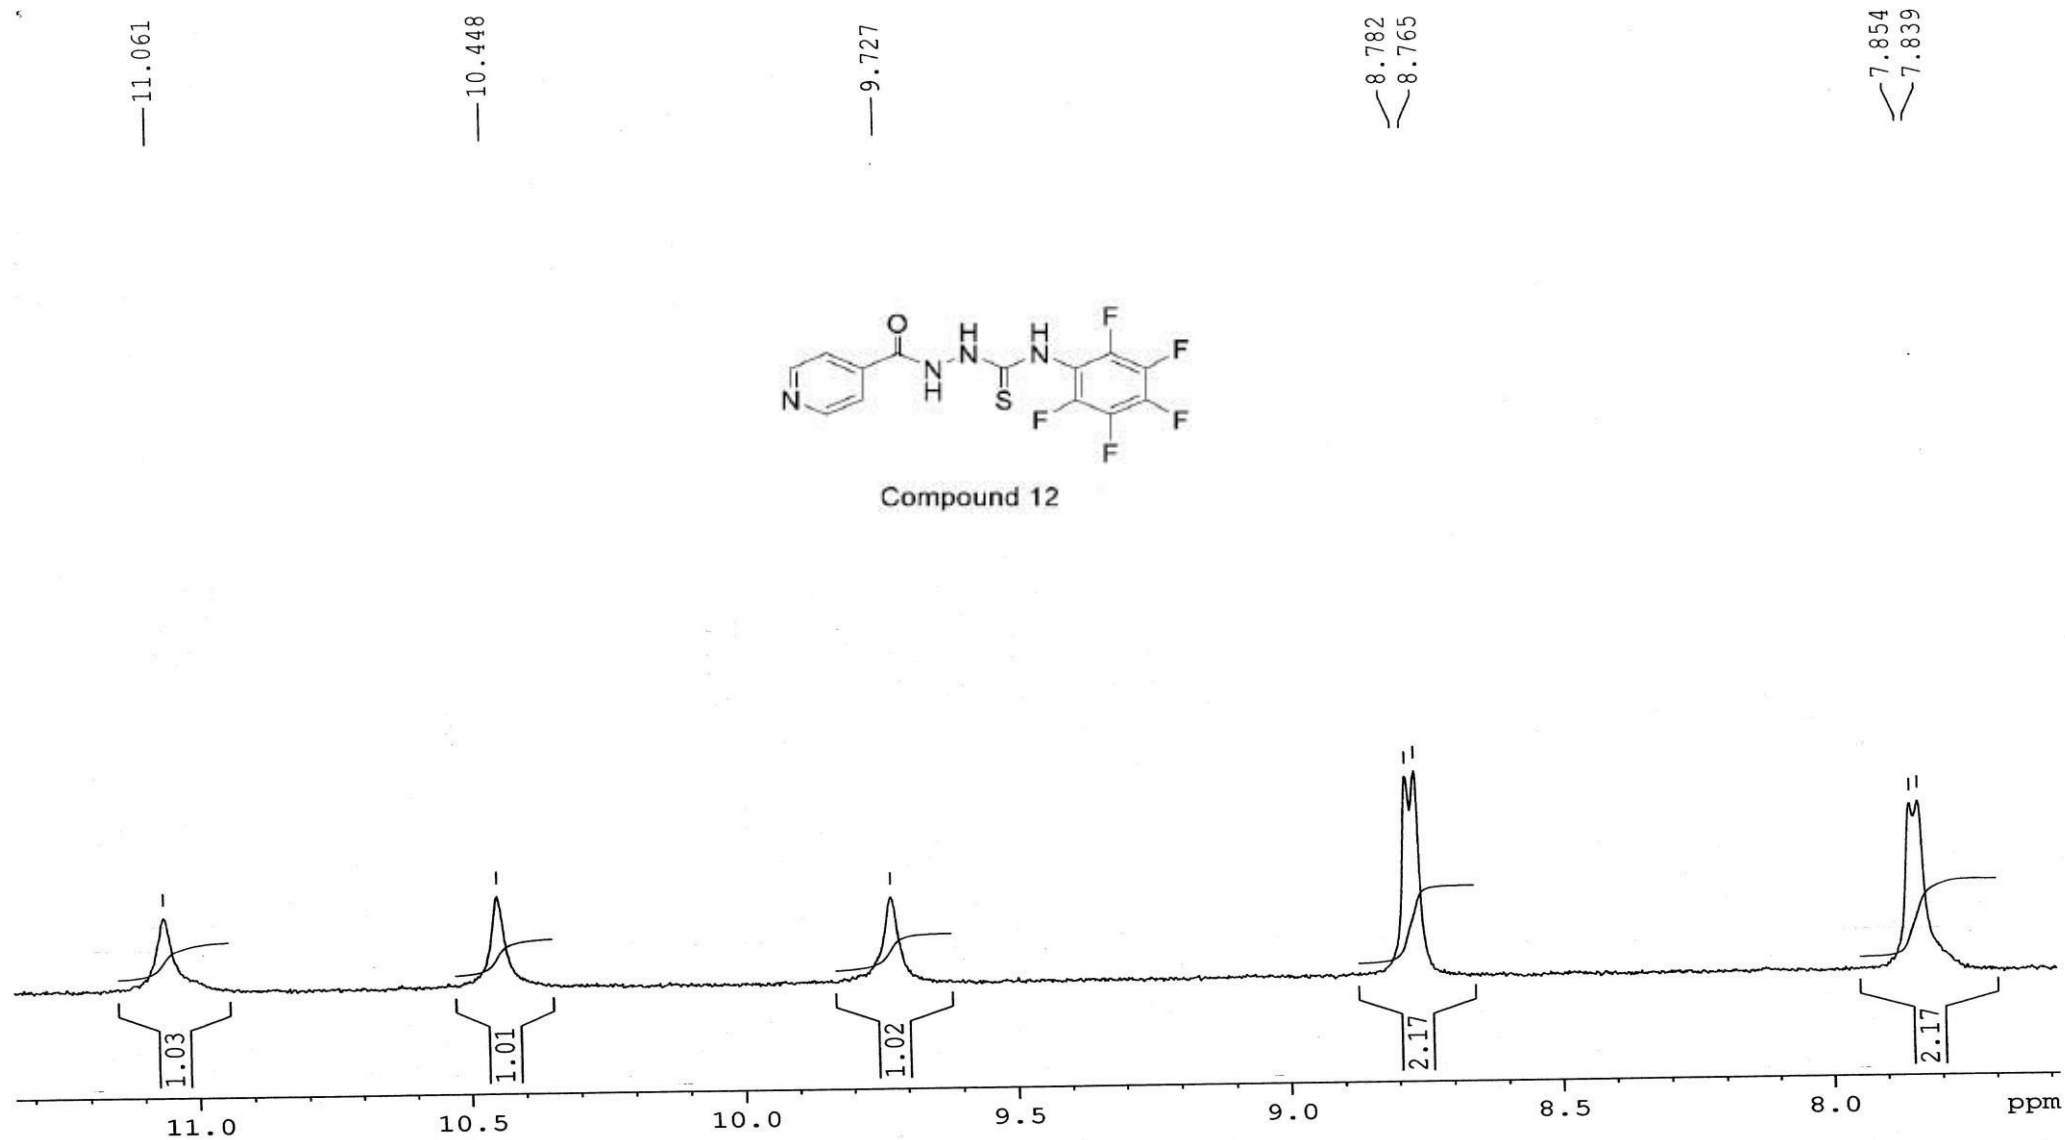

File: FZ-I-ISO-17  
Sample: FAZILA RIZVI /DR. HINA  
Instrument: JEOL-600H-2  
Inlet: Direct Probe

Date Run: 10-04-2016 (Time Run: 15:38:00)

Ionization mode: FAB-

Scan: 1

R.T.: 0

Base: m/z 183; 43.3%FS TIC: 3670516

#Ions: 774

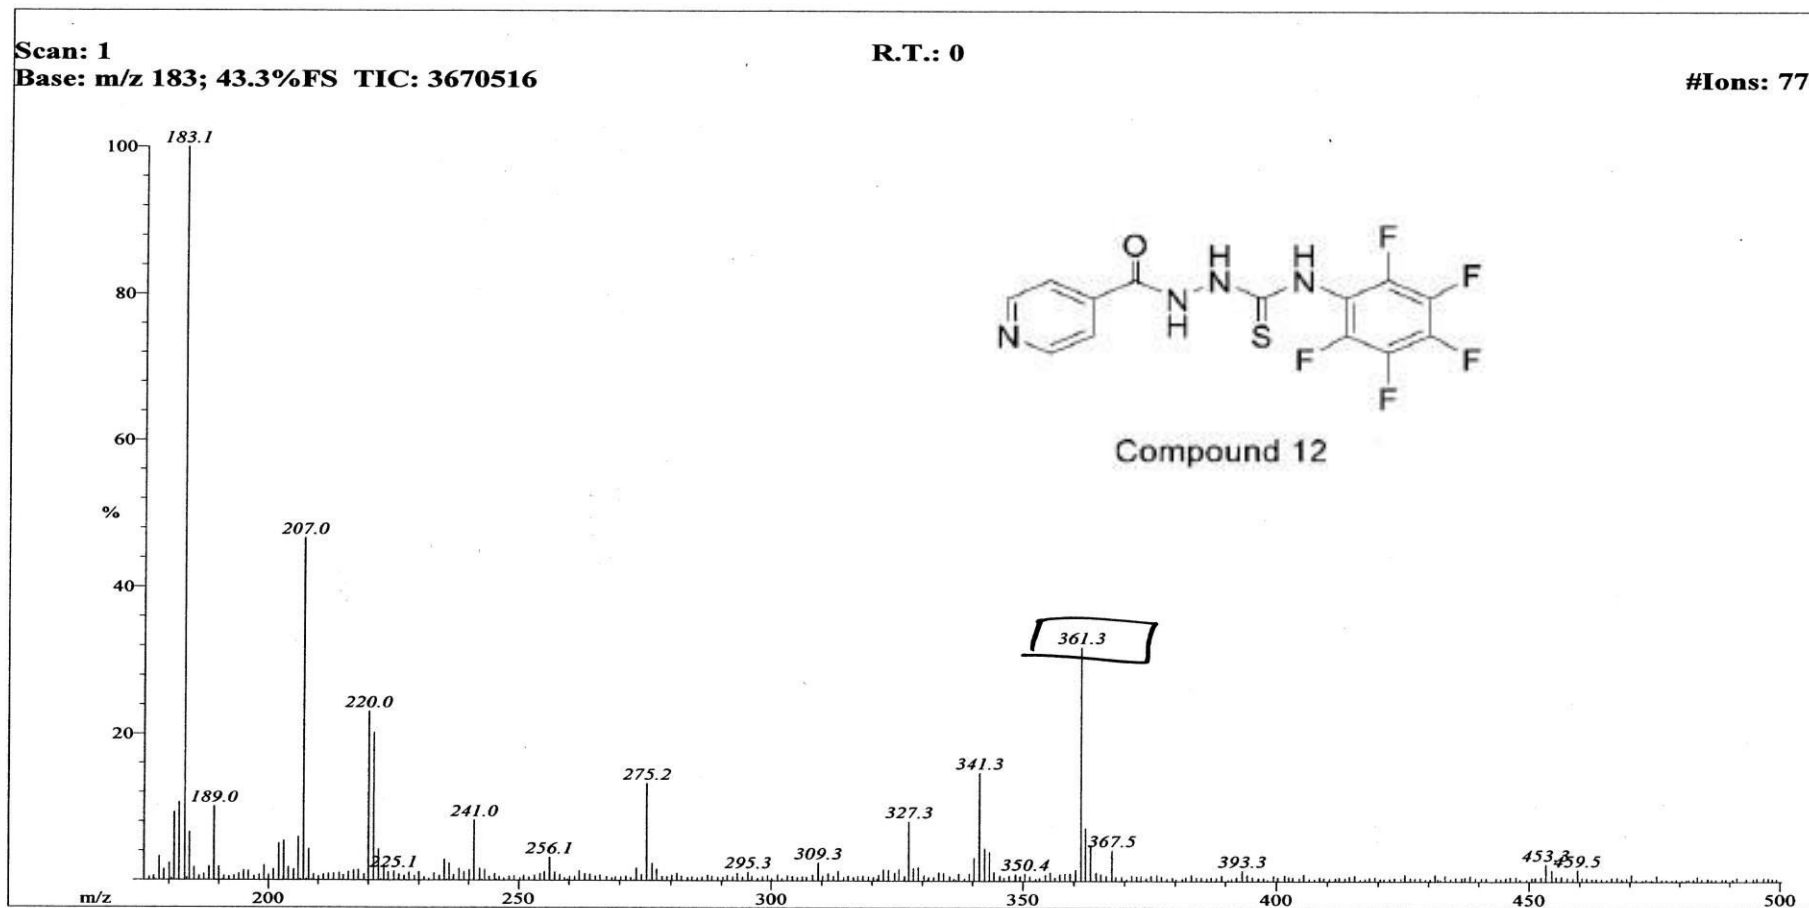

Fazila / Dr. Hina / FZ-II-17 / DMSO  
BB

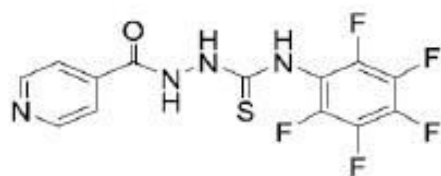

Compound 12

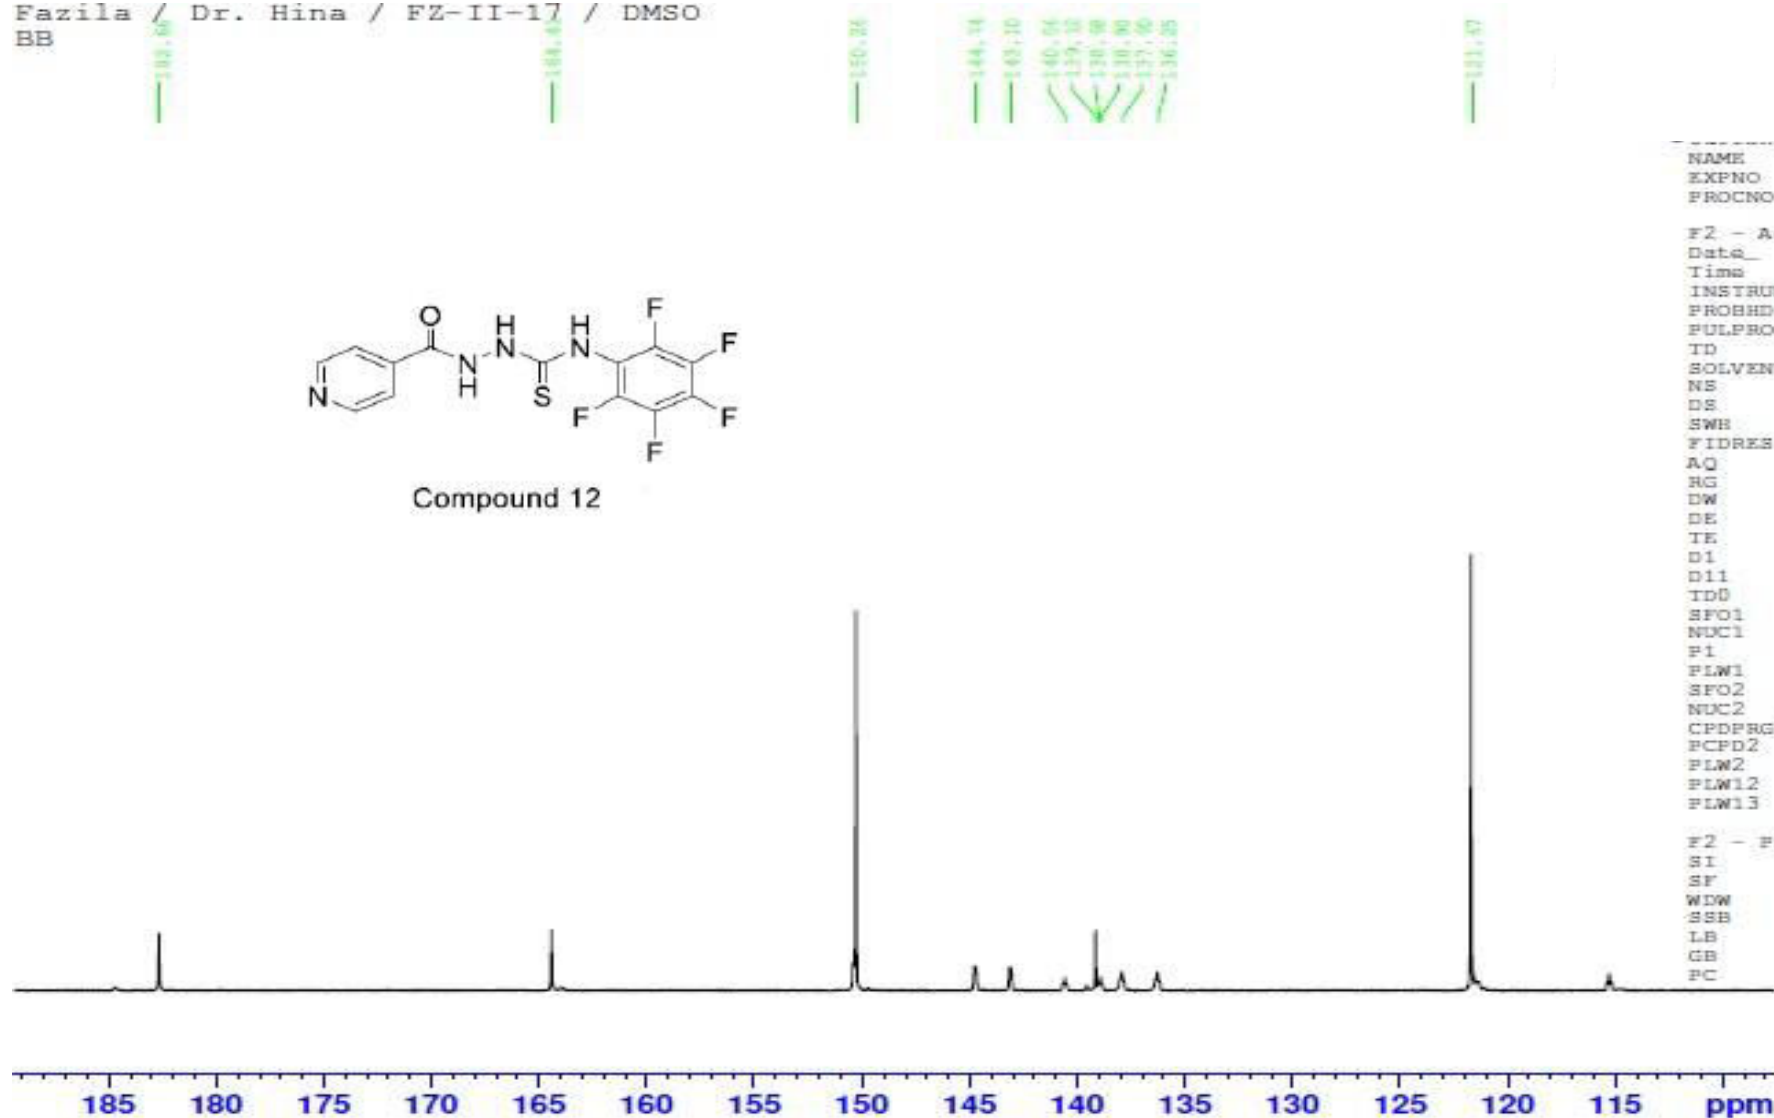

```
-----meters
NAME          fz-ii-17
EXPNO         5
PROCNO        1

F2 - Acquisition Parameters
Date_         20190206
Time          15.00 h
INSTRUM       AVNao_600
PROBHD        Z117768_0039 (
PULPROG       zgpg
TD            32768
SOLVENT       DMSO
NS            5038
DS            4
SWH           35714.285 Hz
FIDRES        2.179827 Hz
AQ            0.4587520 sec
RG            101
DW            14.000 usec
DE            18.00 usec
TE            298.0 K
D1            1.5000000 sec
D11           0.03000000 sec
TD0           8
SFO1          150.9553694 MHz
NUC1          13C
F1            12.00 usec
PLW1          107.76000214 W
SFO2          600.2724011 MHz
NUC2          1H
CPDPRG[2]    waltz65
PCPD2         70.00 usec
PLW2          9.53950024 W
PLW12         0.12460000 W
PLW13         0.06267200 W

F2 - Processing parameters
SI            16384
SF            150.9380853 MHz
WDW           EM
SSB           0
LB            1.00 Hz
GB            0
PC            1.40
```

Fazila / Dr. Hina / FZ-II-17 / DMSO  
DEPT135

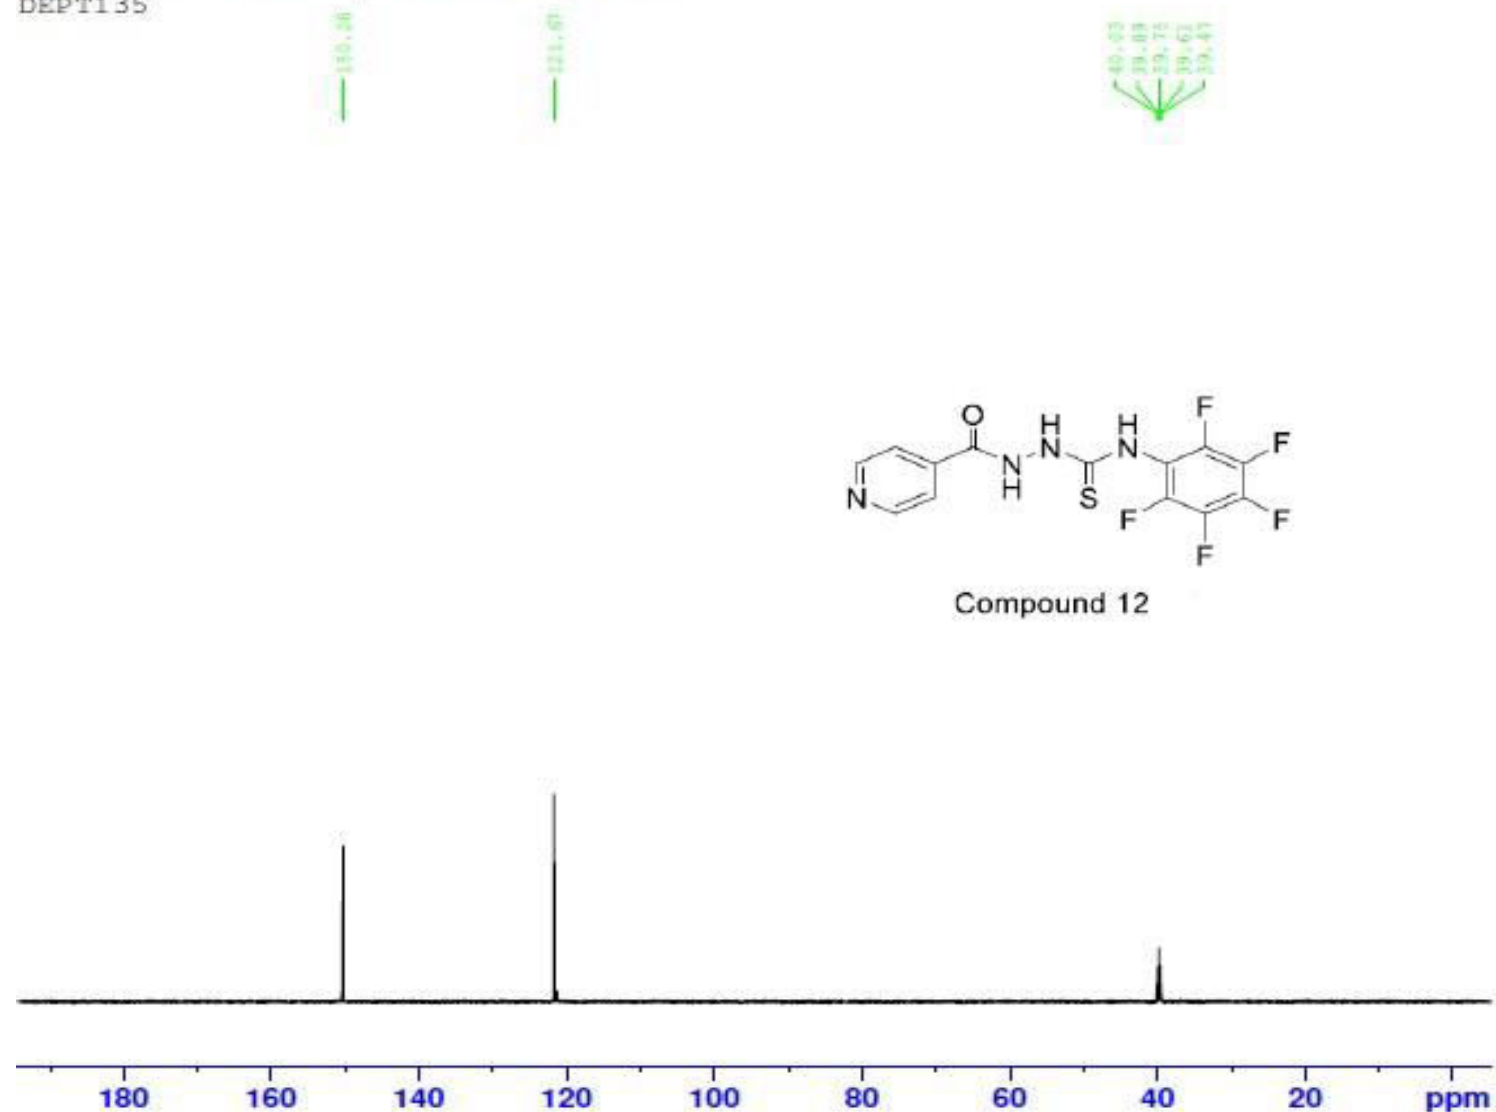

```
NAME          0
PROCNO        1

F2 - Acquisition Parameters
Date_         20190206
Time          15.33 h
INSTRUM       AVNac_600
PROBHD        Z117768_0039 (
PULPROG       deptsp135
ID            32768
SOLVENT       DMSO
NS            925
DS            8
SWH           30120.482 Hz
FIDRES        1.838408 Hz
AQ            0.5439488 sec
RG            101
DW            16.600 usec
DE            18.00 usec
TE            298.0 K
CNST1         145.0000000
D1            1.500000000 sec
D2            0.00344828 sec
D12           0.00002000 sec
TD0           4
SFO1          150.9523507 MHz
NUC1          13C
P1            12.00 usec
P13           2000.00 usec
PLW0          0 W
PLW1          107.76000214 W
SPNAM[5]      Crp60ccomp.4
SFOALS        0.500
SFOFFS5       0 Hz
SPW5          23.70800018 W
SFO2          600.2724011 MHz
NUC2          1H
CPDPRG12      waltz65
P3            8.00 usec
P4            16.00 usec
PCPD2         70.00 usec
PLW2          9.53950024 W
PLW12         0.12460000 W

F2 - Processing parameters
SI            16384
SF            150.9380853 MHz
WDW           EM
SSB           0
LB            1.00 Hz
GB            0
PC            1.40
```

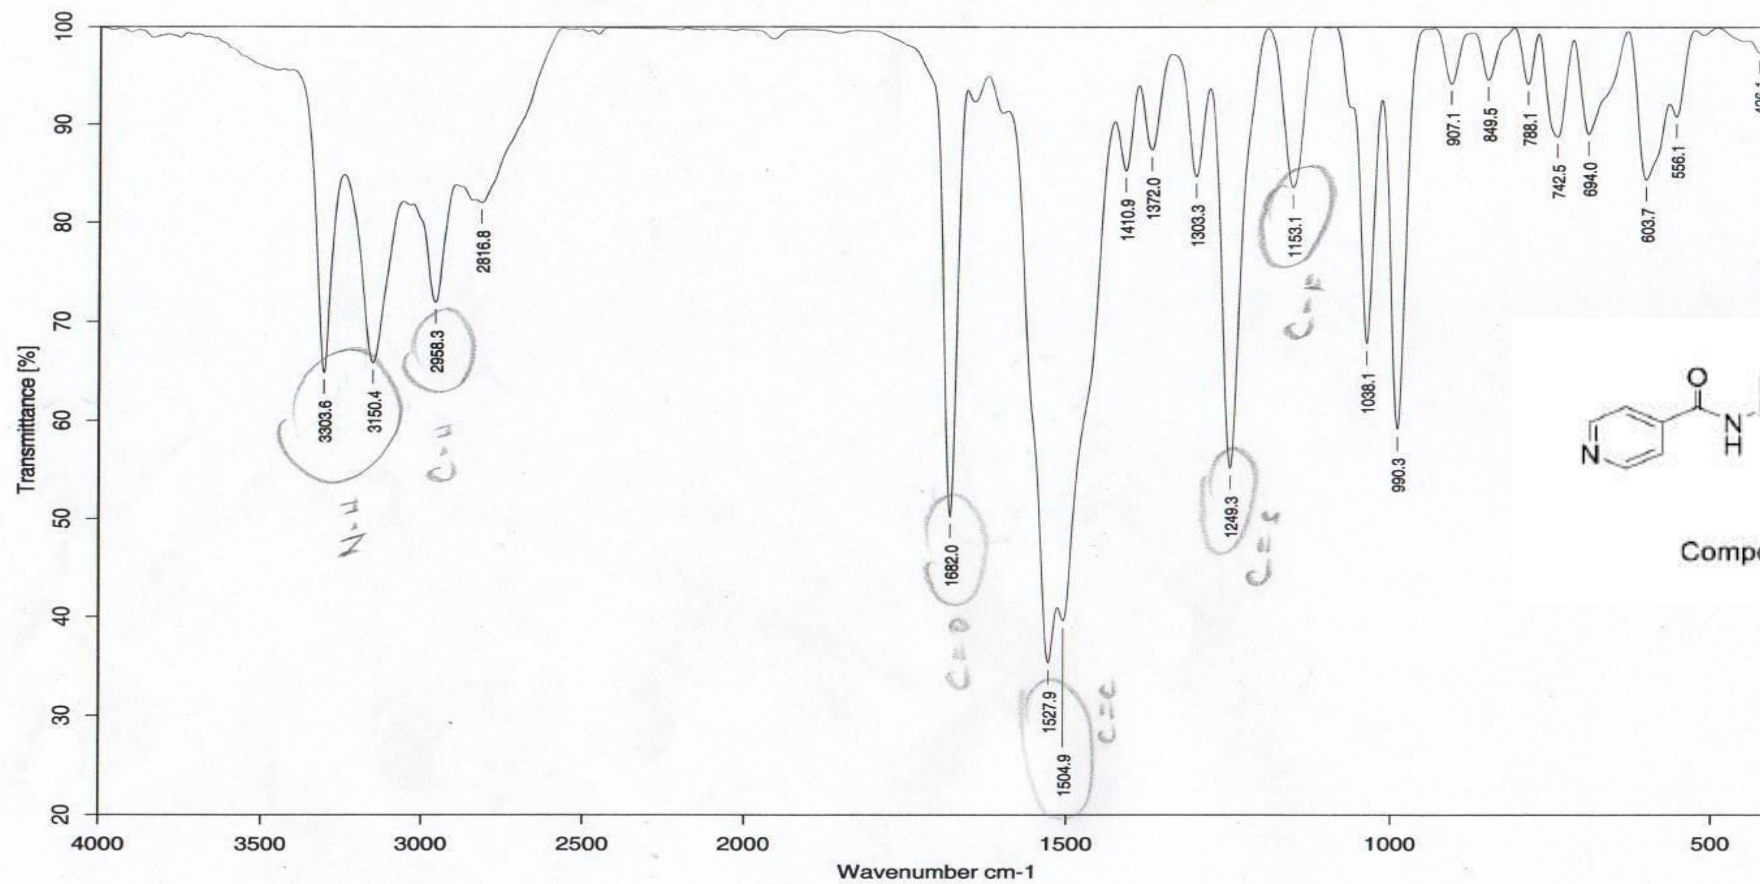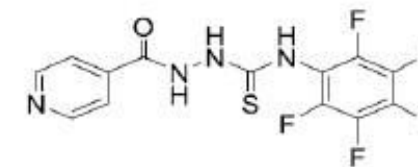

Compound 12

Sample : FZI-ISO17/Fazila Rizvi

Measured : 19/04/2017 on VECTOR22

Resolution : 4 cm<sup>-1</sup> ( 10 scans )

Spectrum : FZ-I-ISO17.0 ( in D:\IRSTUDENT )

Technic : Solid

Analyst : MA/ZA/JS

Dr. Hina / Fz-I-ISO18 / DMSO  
1H

10.544

9.264

8.752

8.736

7.813

7.794

4.114

3.311

2.490

1.779

1.690

1.586

1.550

1.275

1.242

1.206

1.094

1.065

1.035

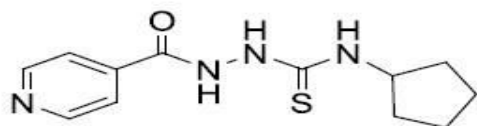

Compound 13

AVANCE AV-300  
LAB NO: 108

NAME Sep26-16  
EXPNO 7  
PROCNO 1  
Date 20160926  
Time 10.45  
INSTRUM spect  
PROBHD 5 mm DUL 13C-1  
PULPROG zg30  
TD 32768  
SOLVENT DMSO  
NS 64  
DS 0  
SWH 5995.204 Hz  
FIDRES 0.182959 Hz  
AQ 2.7329011 sec  
RG 574.7  
DW 83.400 usec  
DE 6.50 usec  
TE 297.8 K  
D1 1.50000000 sec  
TD0 1

----- CHANNEL f1 -----  
NUC1 1H  
P1 12.30 usec  
PL1 4.00 dB  
SFO1 300.1321009 MHz  
SI 16384  
SF 300.1300039 MHz  
WDW EM  
SSB 0  
LB 0.30 Hz  
GB 0  
PC 0.60

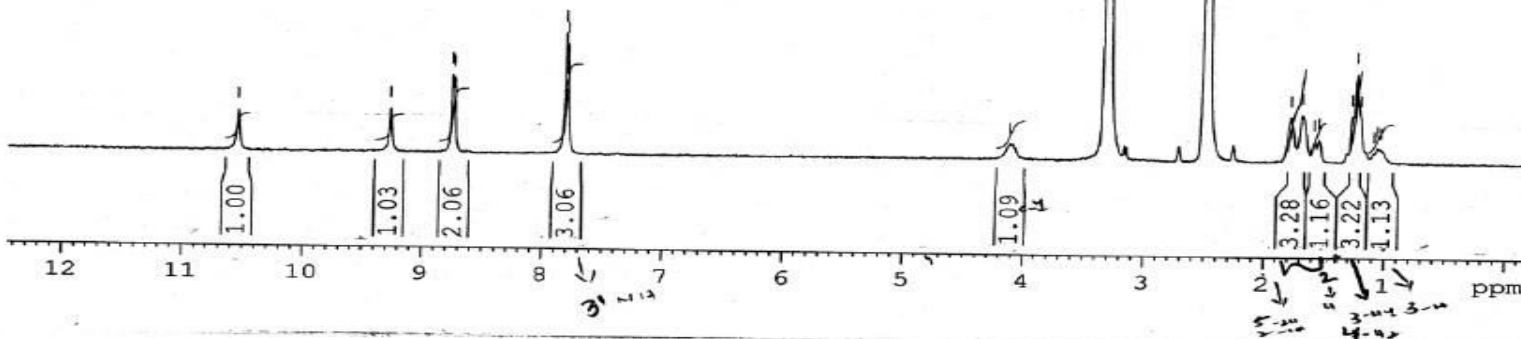



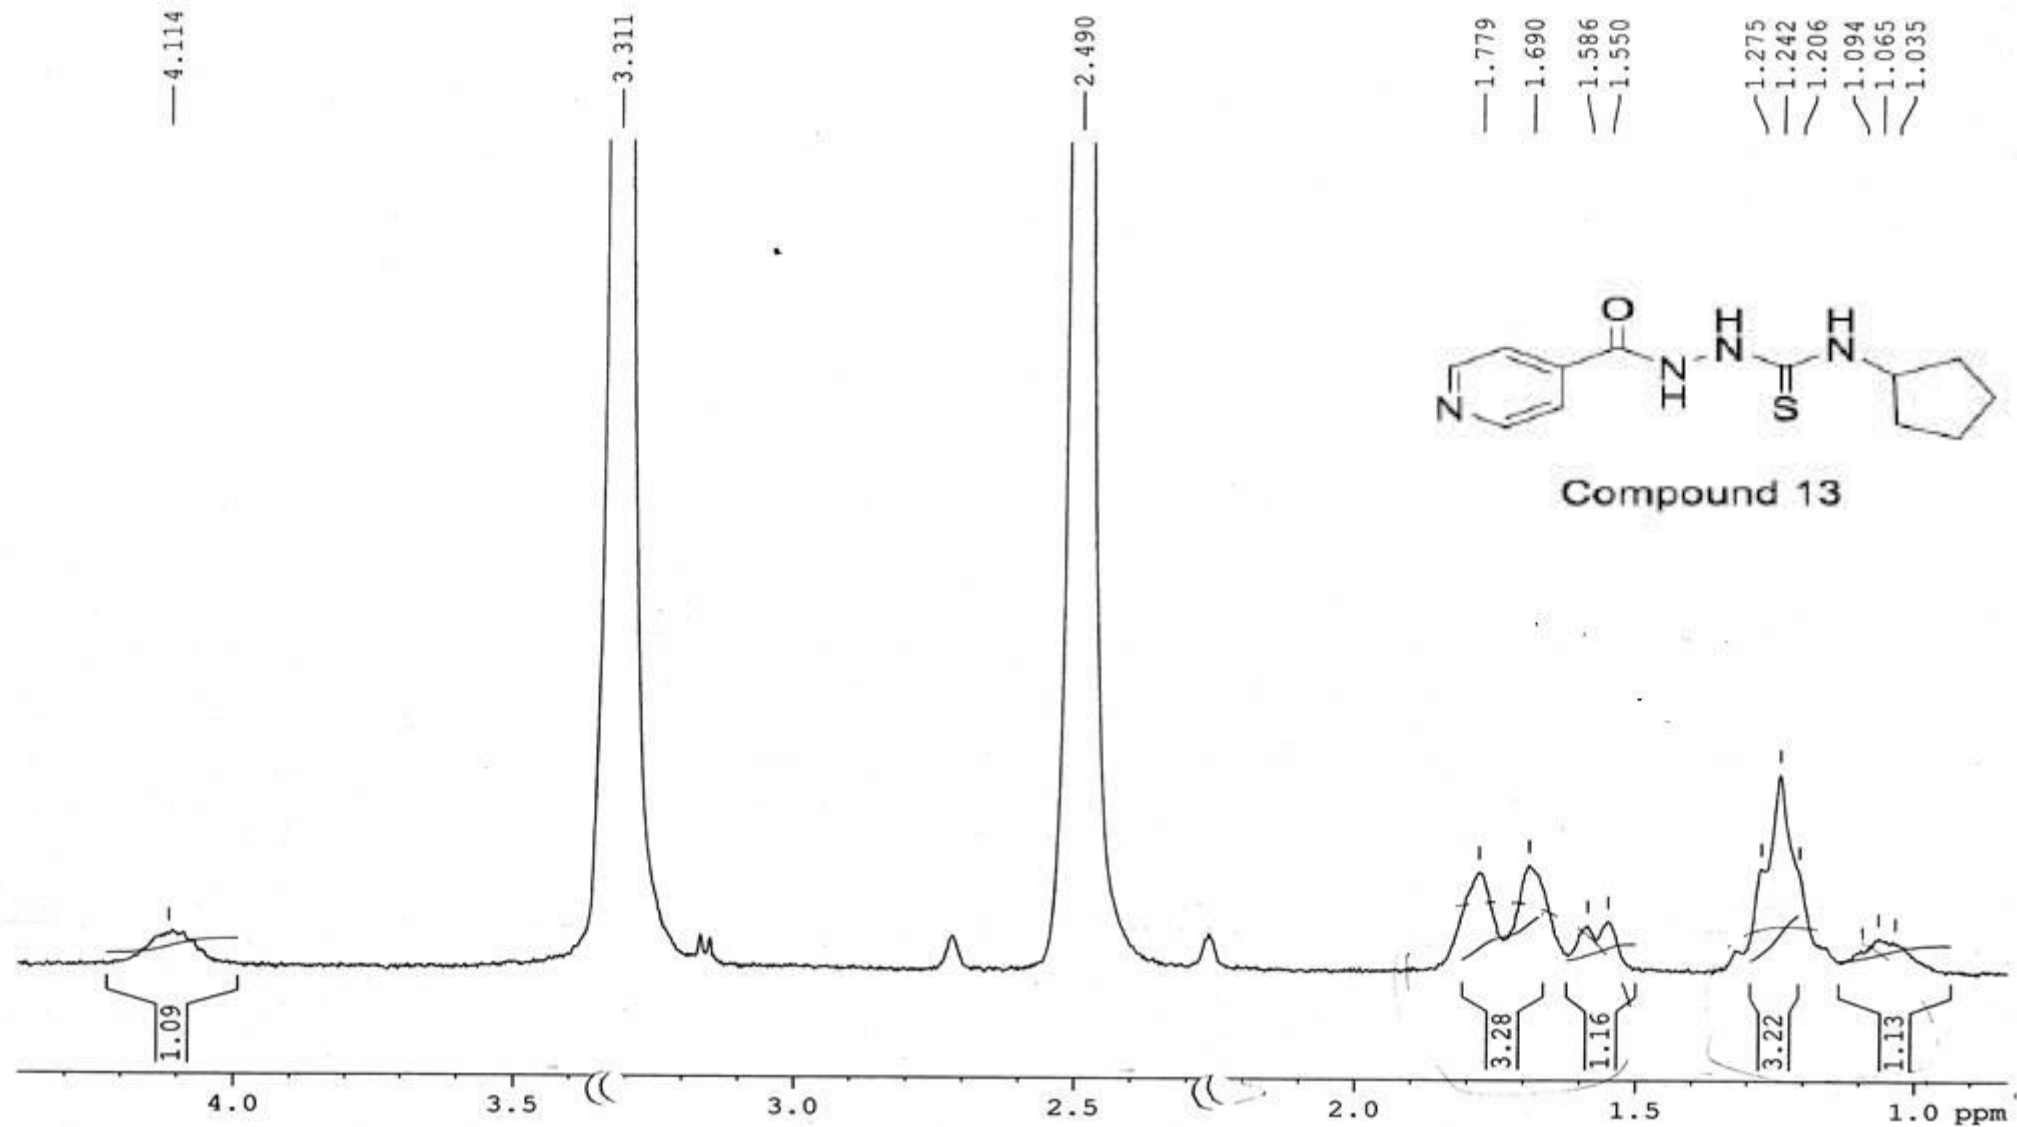

File: FZ-I-ISO-18  
Sample: FAZILA RIZVI /DR. HINA  
Instrument: JEOL-600H-2  
Inlet: Direct Probe

Date Run: 10-04-2016 (Time Run: 15:42:59)

Ionization mode: FAB-

Scan: 2  
Base: m/z 183; 100%FS TIC: 8366892

R.T.: .1

#Ions: 954

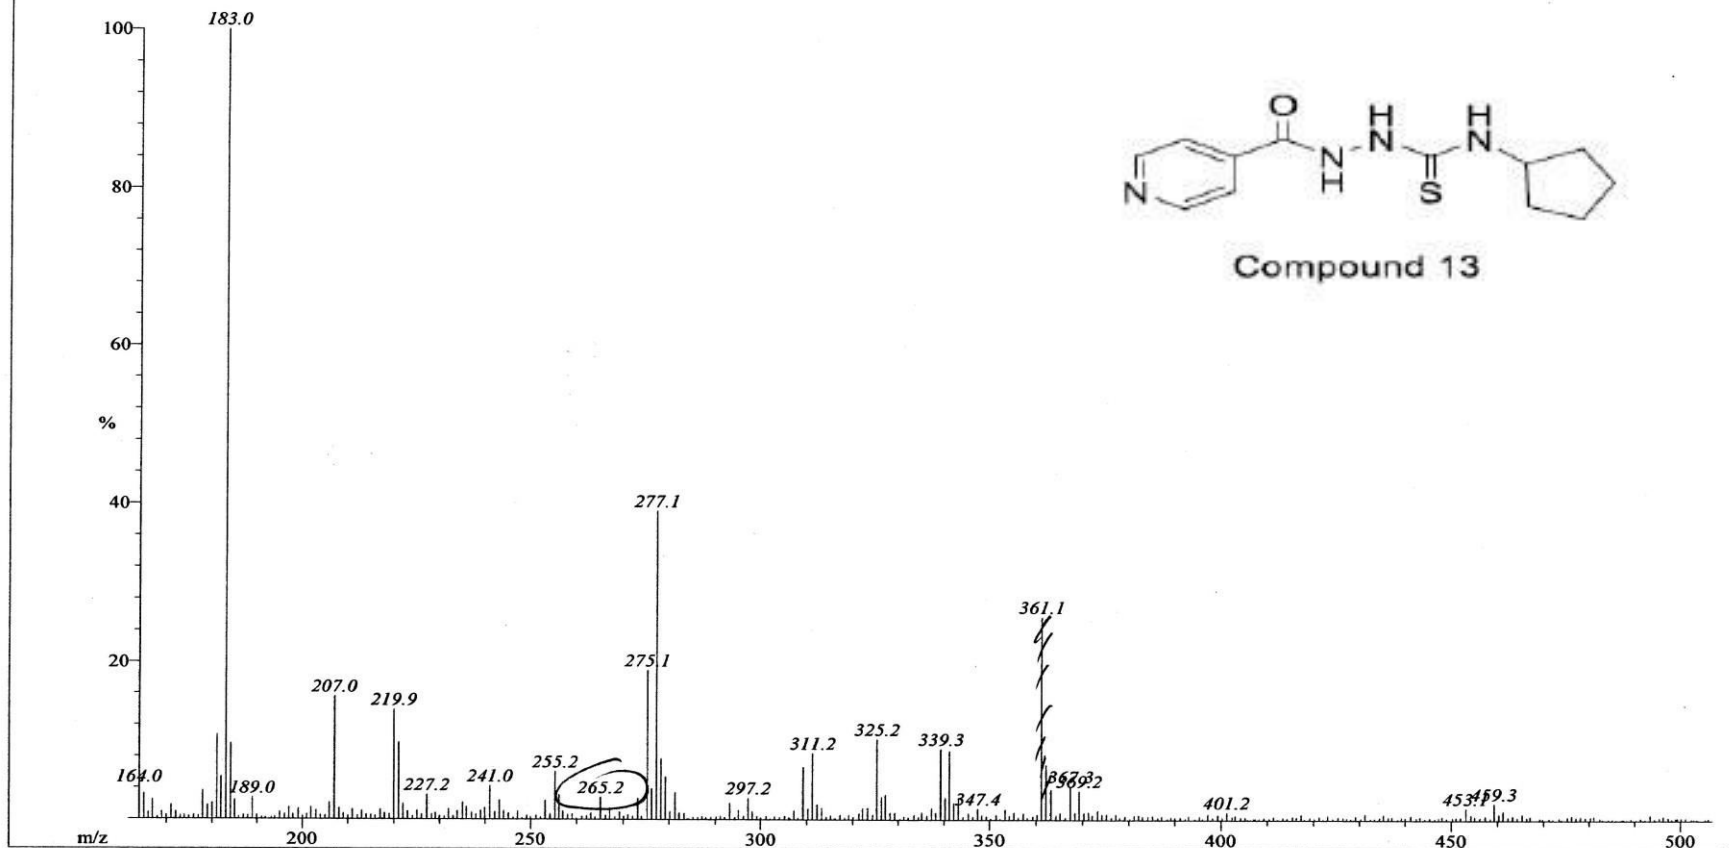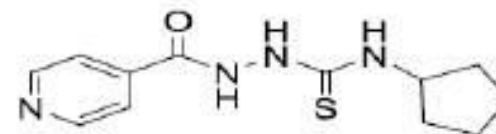

Compound 13

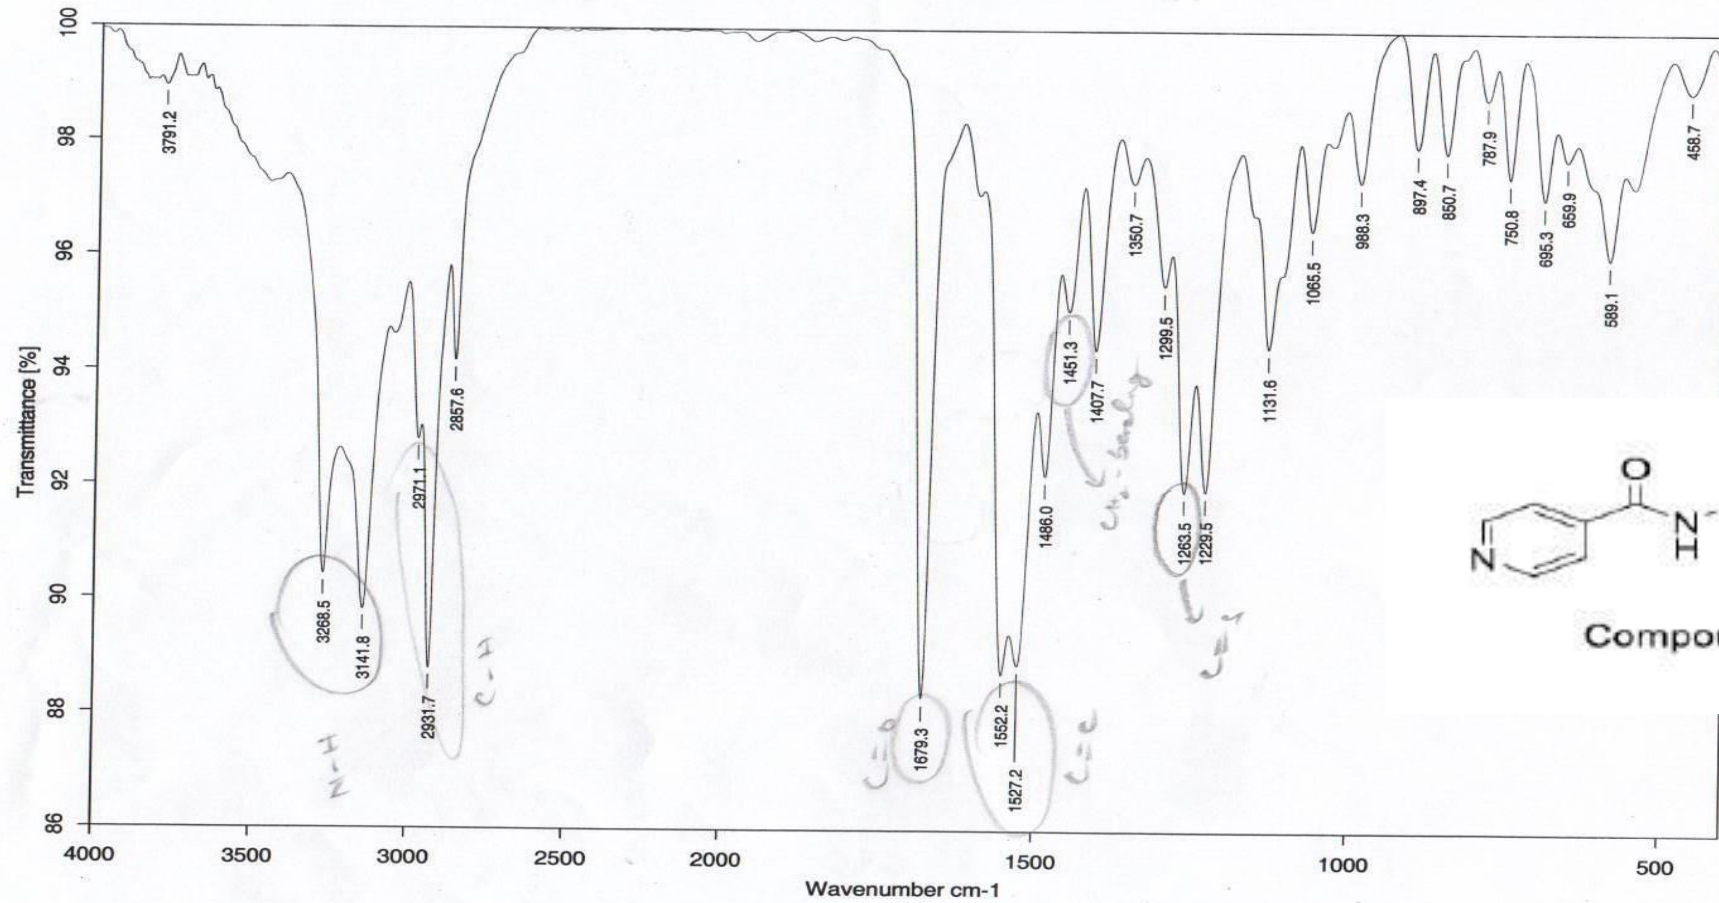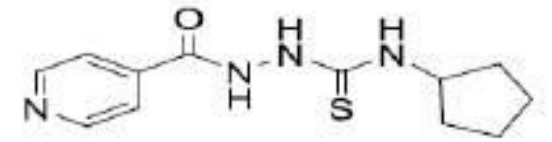

Compound 13

Sample : FZI-ISO18/Fazila Rizvi

Measured : 19/04/2017 on VECTOR22

Resolution : 4  $\text{cm}^{-1}$  ( 10 scans )

Spectrum : FZ-I-ISO18.0 ( in D:\IRSTUDENT )

Technic : Solid

Analyst : MA/ZA/JS

Bushra / Dr. Hina / Fz-I-ISO-19  
1H

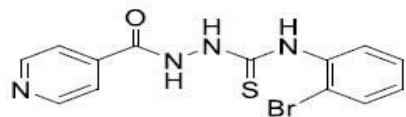

Compound 14

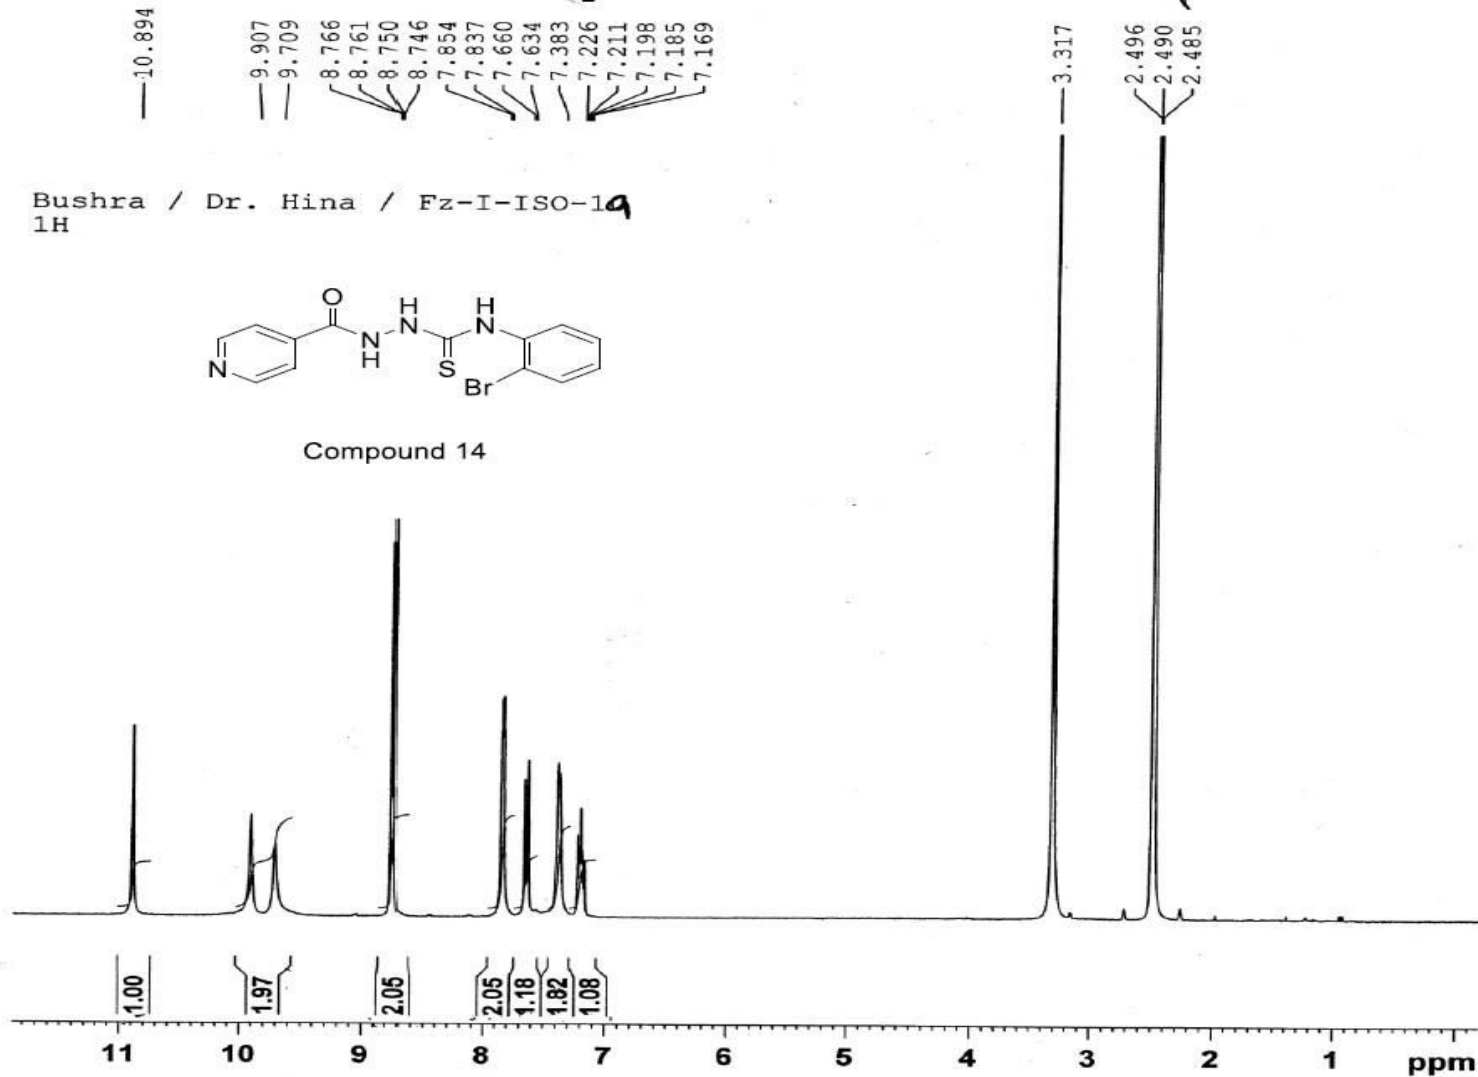

AVANCE AV - III  
300 MHz, LAB # 116

|         |                |
|---------|----------------|
| NAME    | Oct04-16       |
| EXPNO   | 4              |
| PROCNO  | 1              |
| Date_   | 20161004       |
| Time    | 10.47          |
| INSTRUM | Spect          |
| PROBHD  | 5 mm BBO BB-1H |
| PULPROG | zg30           |
| TD      | 32768          |
| SOLVENT | DMSO           |
| NS      | 64             |
| DS      | 0              |
| SWH     | 6188.119 Hz    |
| FIDRES  | 0.188846 Hz    |
| AQ      | 2.6477044 sec  |
| RG      | 203            |
| DW      | 80.800 usec    |
| DE      | 6.50 usec      |
| TE      | 300.0 K        |
| D1      | 2.00000000 sec |
| TD0     | 1              |

|                        |                 |  |
|------------------------|-----------------|--|
| ===== CHANNEL f1 ===== |                 |  |
| NUC1                   | 1H              |  |
| P1                     | 12.50 usec      |  |
| PL1                    | 0.00 dB         |  |
| PL1W                   | 13.16228485 W   |  |
| SFO1                   | 300.1318534 MHz |  |
| SI                     | 32768           |  |
| SF                     | 300.1300040 MHz |  |
| WDW                    | EM              |  |
| SSB                    | 0               |  |
| LB                     | 0.30 Hz         |  |
| GB                     | 0               |  |
| PC                     | 1.00            |  |

—10.894

—9.907 <sup>2</sup>

—9.709

8.766  
8.761  
8.750  
8.746

7.854  
7.837

7.660  
7.634

7.383  
7.226  
7.211  
7.198  
7.185  
7.169

Bushra / Dr. Hina / Fz-I-ISO-10  
1H

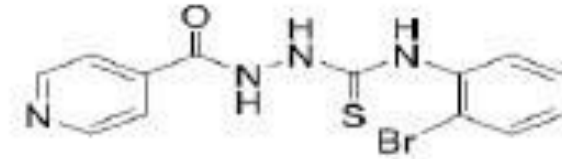

Compound 14

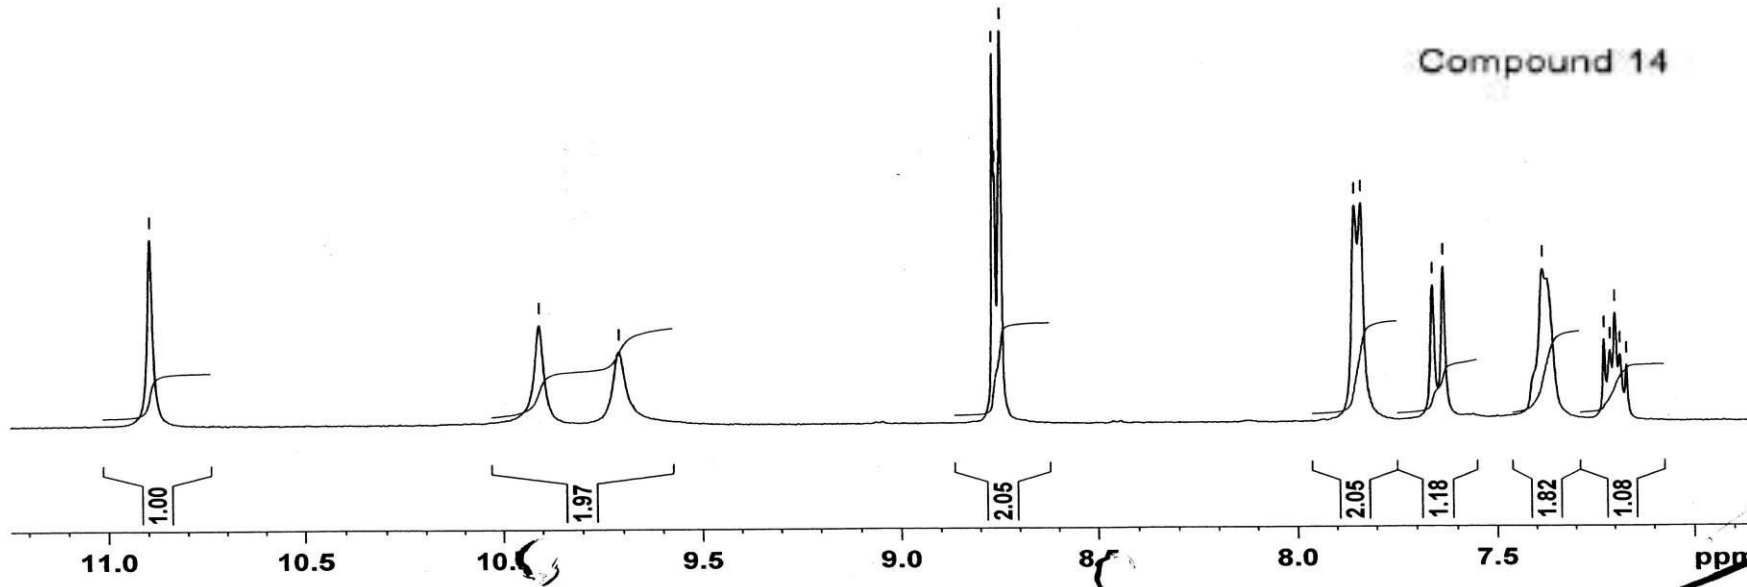

File: FZ-I-ISO19  
Sample: BUSHRA QAMAR /DR. HINA  
Instrument: JEOL-600H-2  
Inlet: Direct Probe

Date Run: 10-05-2016 (Time Run: 10:05:14)

Ionization mode: FAB+

Scan: 8

Base: m/z 185; 24.4%FS TIC: 679392

R.T.: .62

#Ions: 80

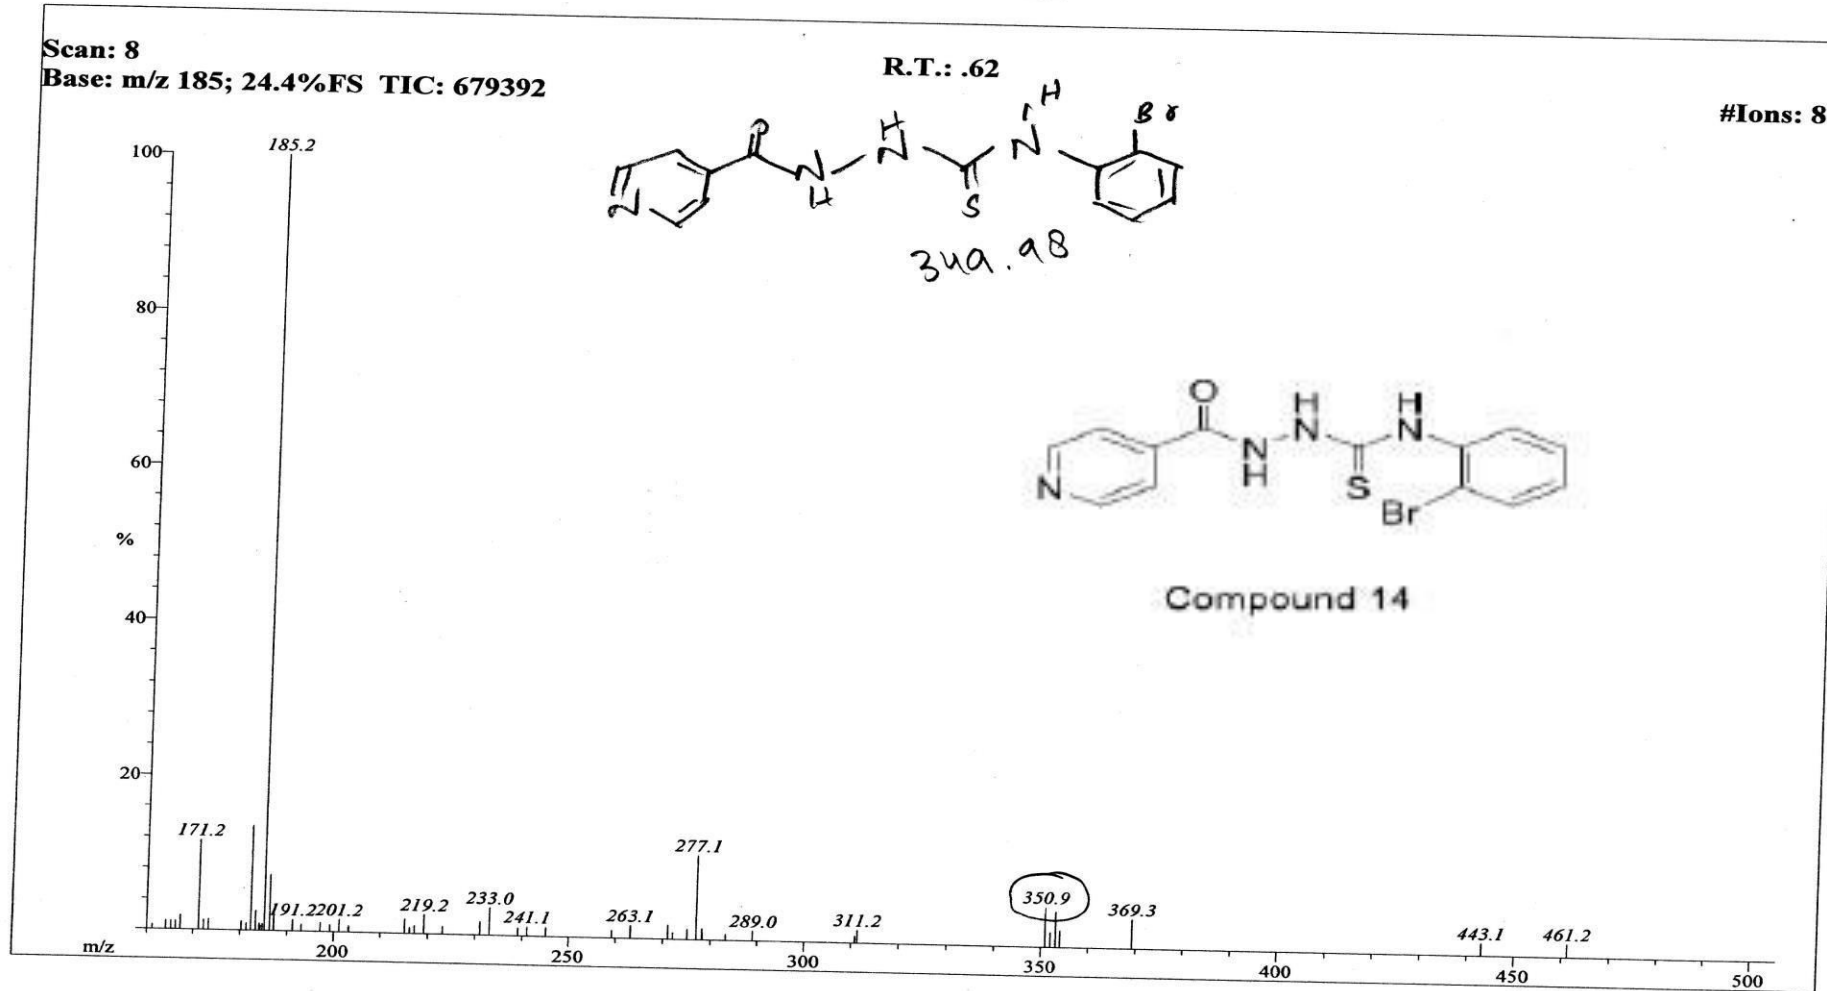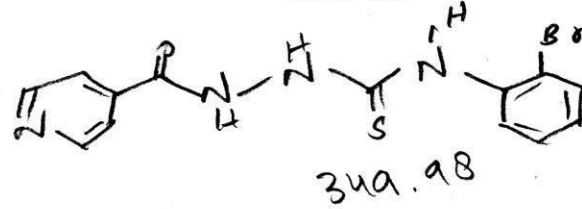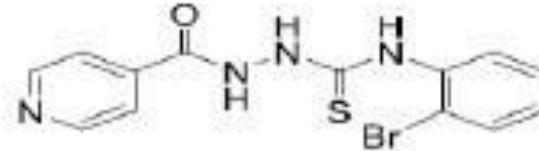

Compound 14

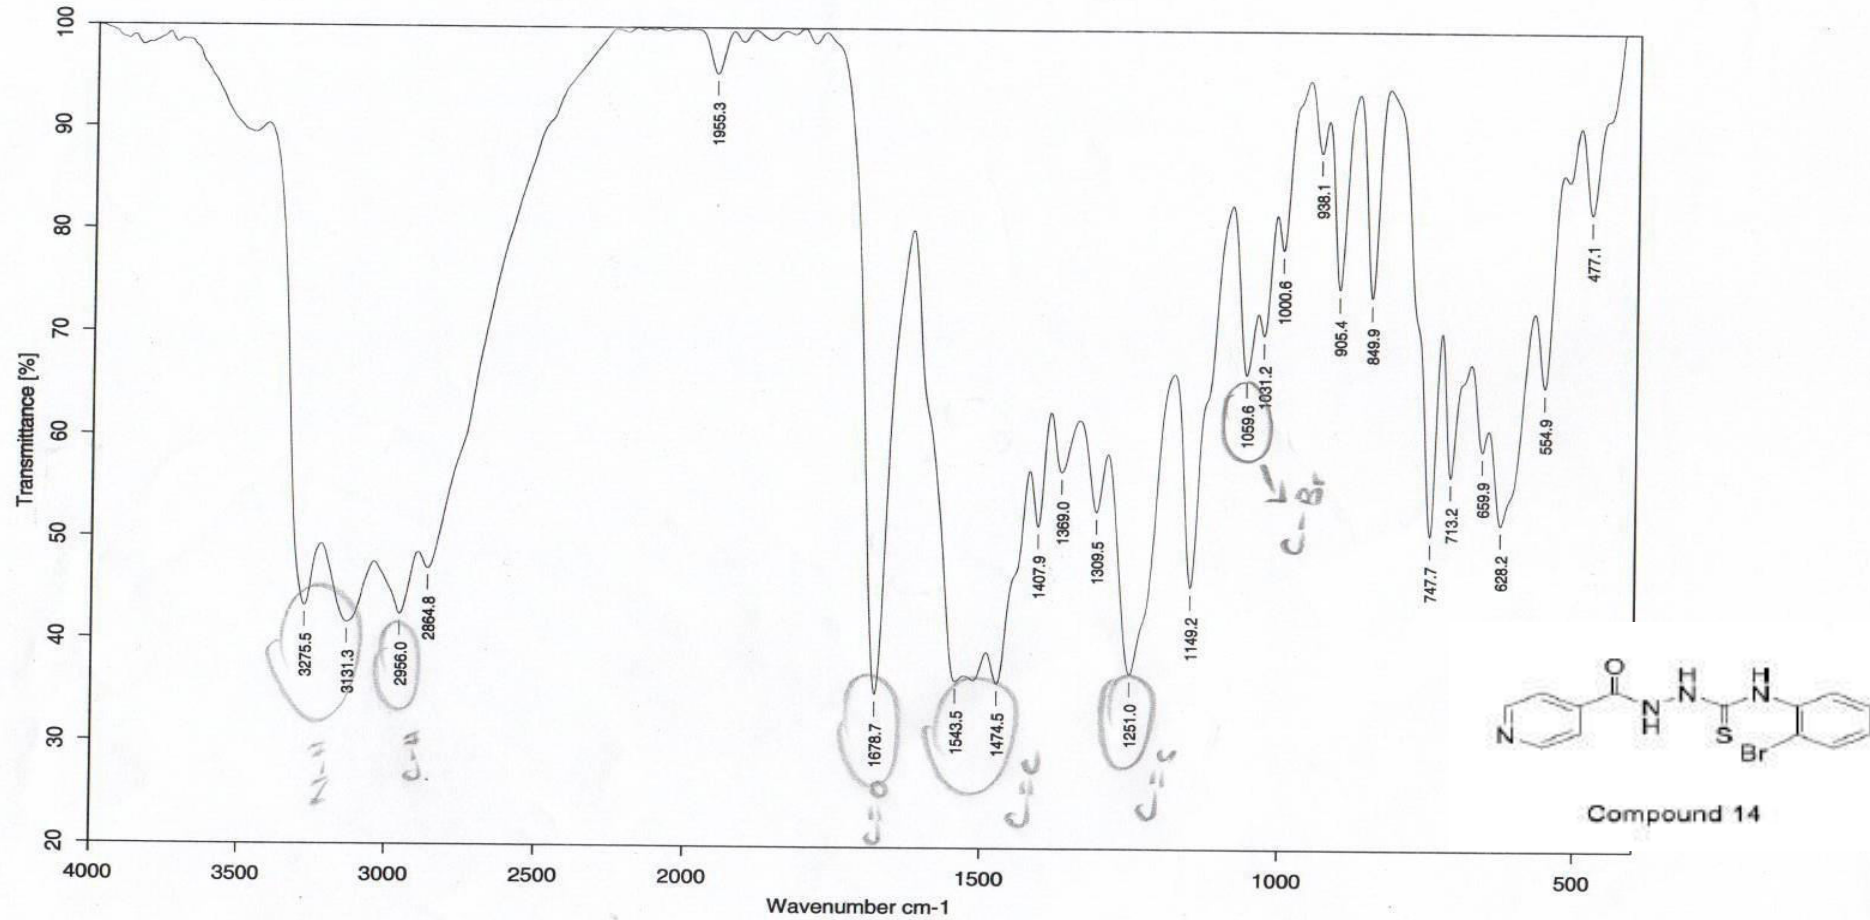

Sample : FZI-ISO19/Fazila Rizvi  
 Measured : 19/04/2017 on VECTOR22  
 Resolution : 4 cm-1 ( 10 scans )

Spectrum : FZ-I-ISO19.0 ( in D:\IRSTUDENT )  
 Technic : Solid  
 Analyst : MA/ZA/JS

FAZILA/DR, HINA/FZ-I-IS01/  
ICCBS.U.O.K/

AVANCE AV - III  
300 MHz, LAB # 116

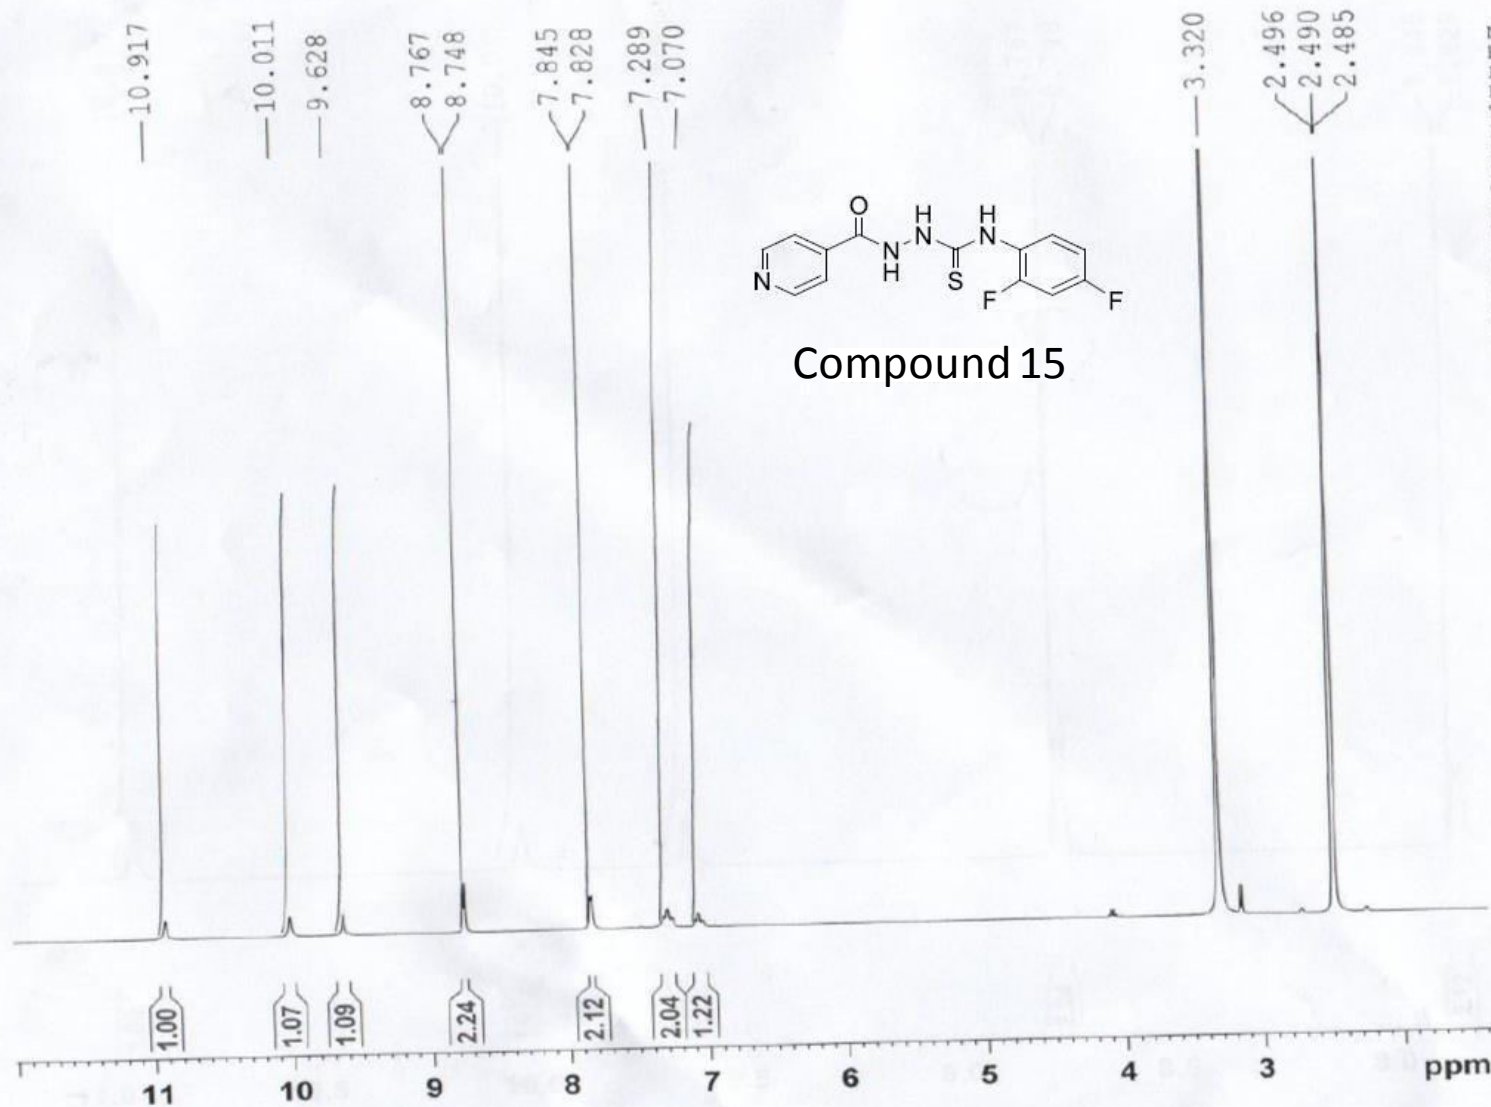

NAME jan03-19  
EXPNO 8  
PROCNO 1  
Date\_ 20190103  
Time\_ 11.59  
INSTRUM Spect  
PROBHD 5 mm BBO BB-1H  
PULPROG zg30  
TD 32768  
SOLVENT DMSO  
NS 128  
DS 0  
SWH 6188.119 Hz  
FIDRES 0.188846 Hz  
AQ 2.6477044 sec  
RG 406  
DW 80.800 usec  
DE 6.50 usec  
TE 300.0 K  
D1 1.50000000 sec  
TD0 1

----- CHANNEL f1 -----  
NUC1 1H  
P1 12.50 usec  
PL1 0.00 dB  
PL1W 13.16228485 W  
SFO1 300.1321009 MHz  
SI 16384  
SF 300.1300039 MHz  
WDW EM  
SSB 0  
LB 0.30 Hz  
GB 0  
PC 1.00



FAZILA/DR, HINA/FZ-I-ISO1/  
ICCBS.U.O.K/

AVANCE AV - III  
300 MHz, LAB # 118

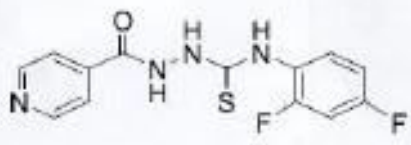

Compound 15

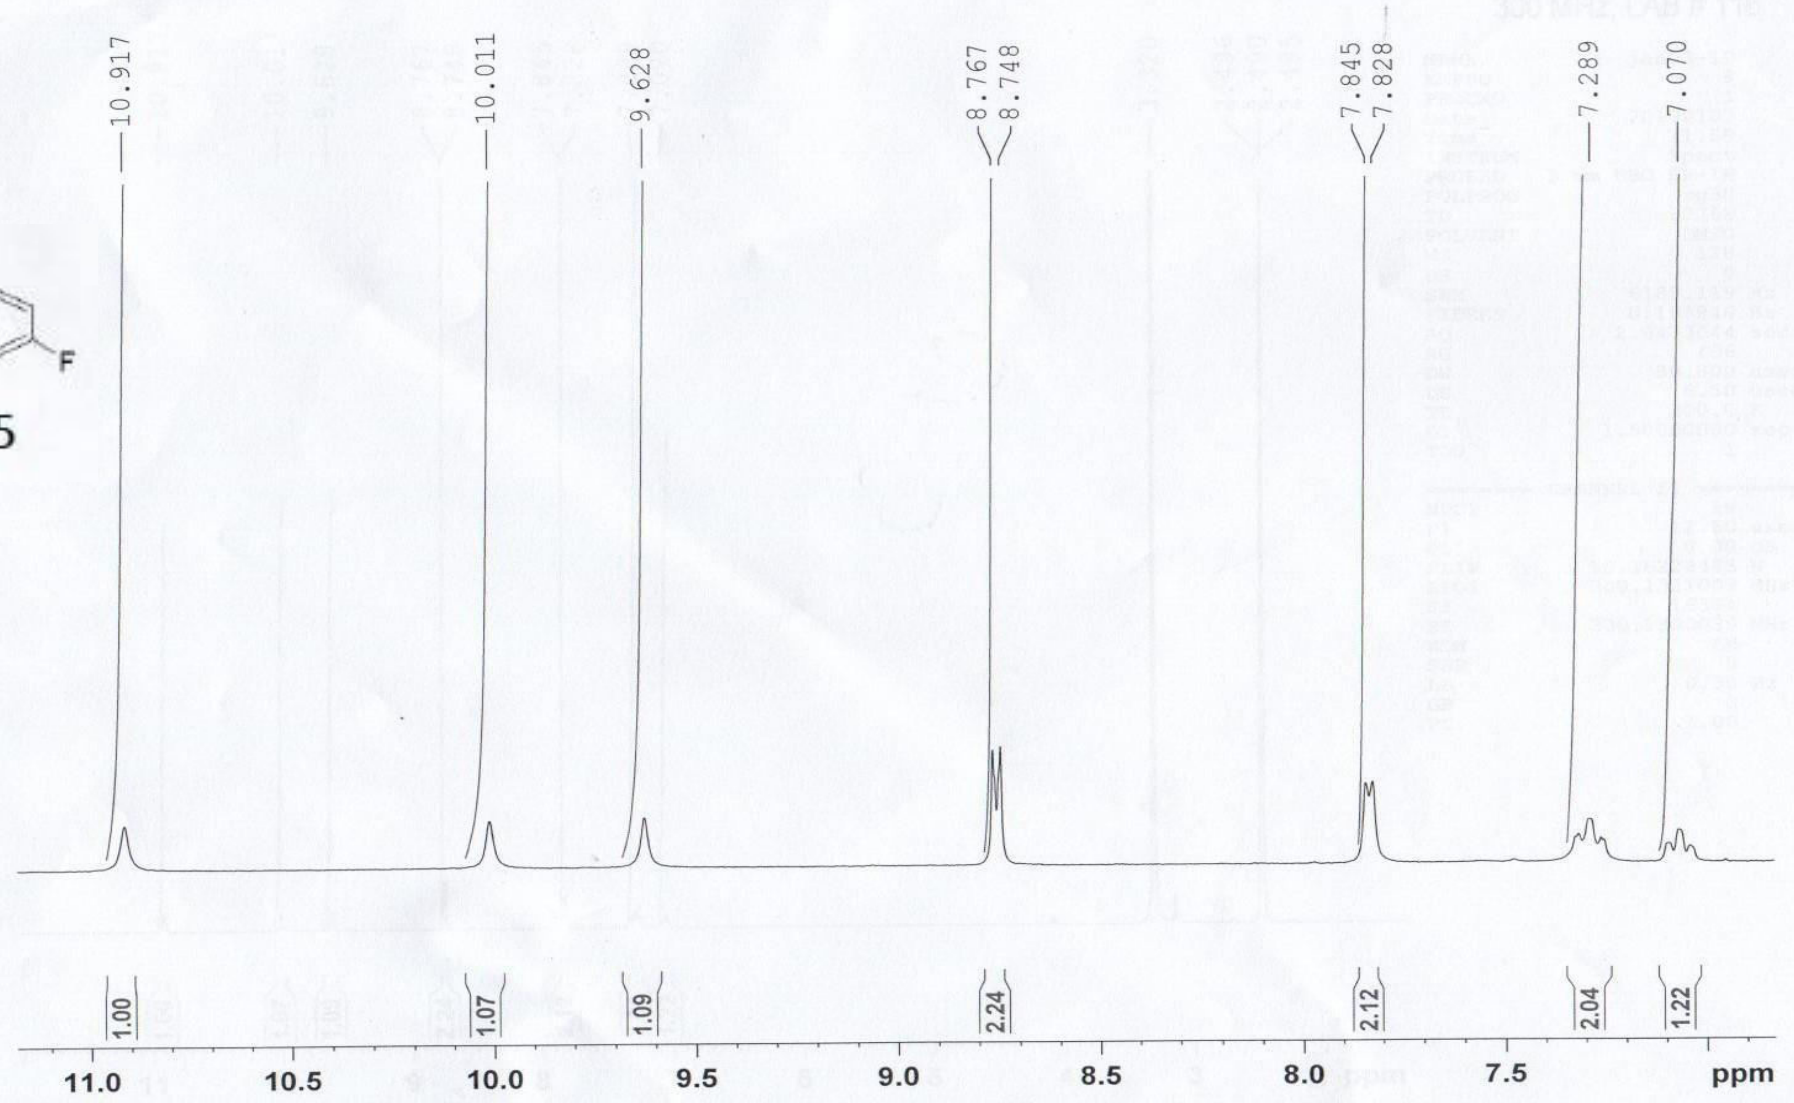

HEJ MASS SECTION  
1/22/2016 11:23:32 AM

File: FZ-I-IS01  
Sample: FAZILA RIZVI / DR. HINA  
Instrument: JEOL MS 600H-1

Date Run: 01-22-2016 (Time Run: 11:17:36)

Ionization mode: EI+

Scan: 22  
Base: m/z 171; 22.7%FS TIC: 1213396

R.T.: 1.87

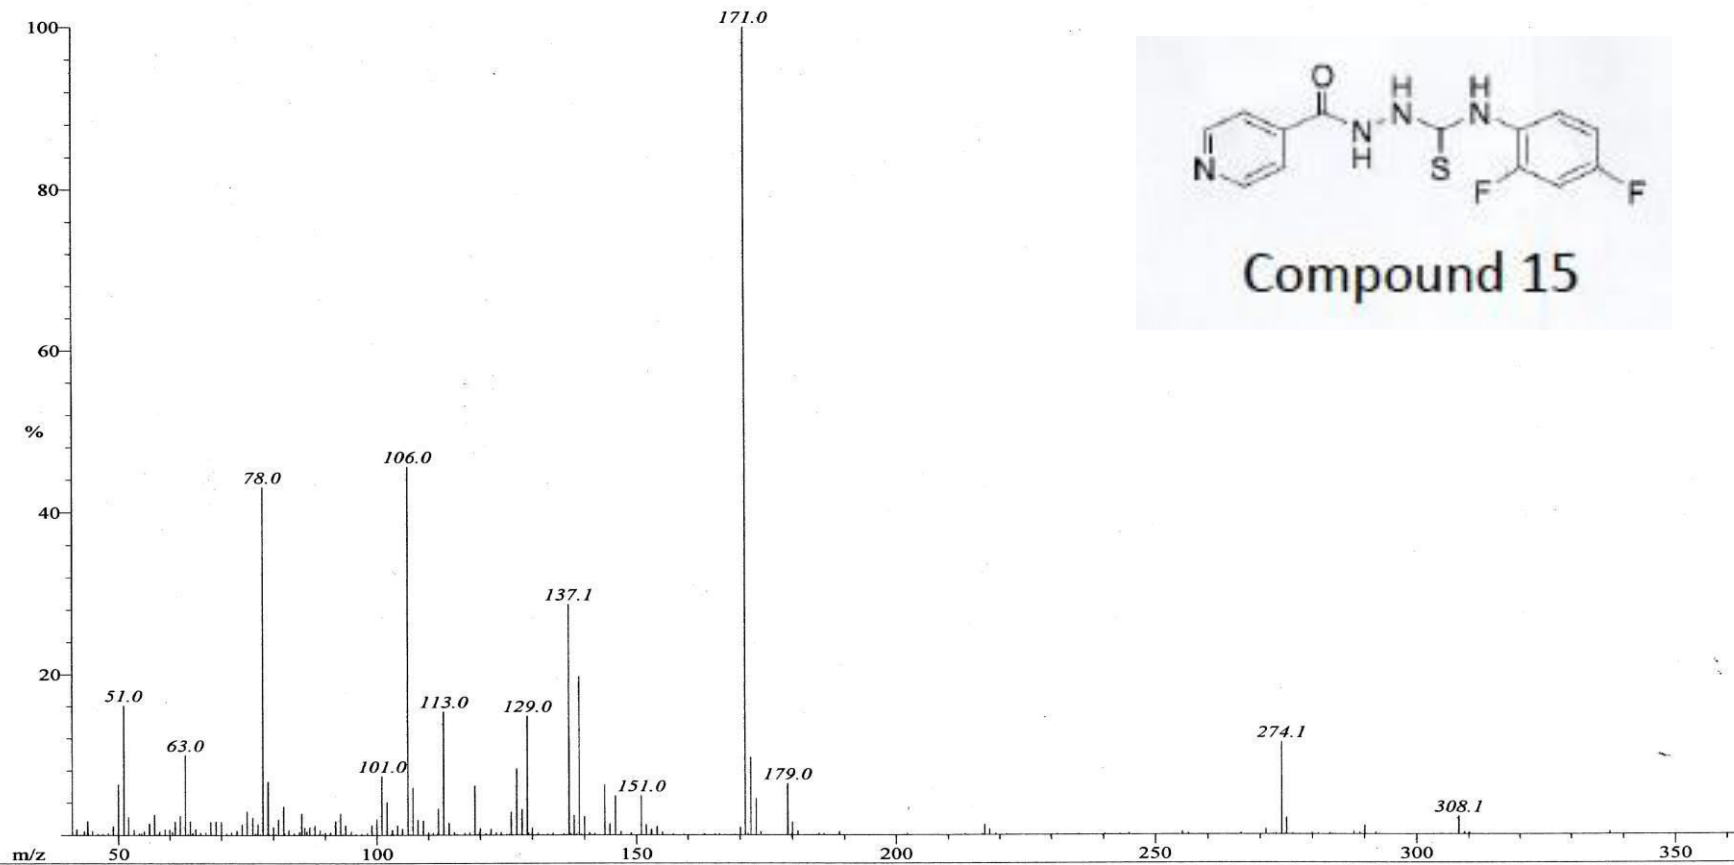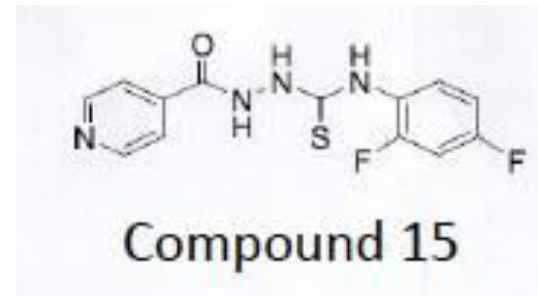

HEJ MASS SECTION  
1/22/2016 11:23:57 AM

File: FZ-I-IS01  
Sample: FAZILA RIZVI / DR. HINA  
Instrument: JEOL MS 600H-1

Date Run: 01-22-2016 (Time Run: 11:17:36)

Ionization mode: EI+

Scan: 22  
Base: m/z 171; 22.7%FS TIC: 1213396

R.T.: 1.87

Threshold: .2% of Base

Displayed TIC: 1213396

| Mass | %Base | Mass | %Base | Mass | %Base | Mass  | %Base | Mass  | %Base | Mass  | %Base | Mass  | %Base | Mass  | %Base |
|------|-------|------|-------|------|-------|-------|-------|-------|-------|-------|-------|-------|-------|-------|-------|
| 41.9 | .8    | 59.0 | .8    | 76.5 | .2    | 93.0  | 2.7   | 114.0 | 1.5   | 136.1 | .2    | 170.0 | 1.0   | 271.1 | .7    |
| 43.3 | .5    | 60.0 | .7    | 77.0 | 1.4   | 94.0  | 1.2   | 115.1 | .4    | 137.1 | 28.7  | 171.0 | 100.0 | 273.0 | .2    |
| 44.0 | 1.8   | 60.5 | .5    | 78.0 | 43.1  | 95.0  | .5    | 117.0 | .3    | 137.4 | .2    | 171.5 | .2    | 274.1 | 11.5  |
| 44.1 | .3    | 61.0 | 1.7   | 79.0 | 6.7   | 97.1  | .2    | 118.0 | .3    | 138.1 | 2.5   | 172.0 | 9.6   | 275.1 | 2.1   |
| 44.9 | .6    | 62.0 | 2.4   | 80.0 | 1.0   | 98.1  | .3    | 119.0 | 6.1   | 139.0 | 19.8  | 173.0 | 4.5   | 279.9 | .2    |
| 45.9 | .2    | 63.0 | 9.9   | 81.0 | 2.0   | 99.0  | 1.2   | 119.9 | .4    | 140.0 | 2.3   | 174.0 | .5    | 288.0 | .4    |
| 46.9 | .2    | 64.0 | 1.8   | 82.0 | 3.6   | 100.0 | 2.0   | 120.0 | .9    | 141.0 | .3    | 179.0 | 6.4   | 289.1 | .2    |
| 48.0 | .3    | 64.5 | .3    | 82.2 | .2    | 101.0 | 7.3   | 121.0 | .2    | 142.0 | .3    | 180.0 | 1.6   | 290.1 | 1.1   |
| 49.0 | 1.1   | 65.0 | .8    | 83.0 | .7    | 102.0 | 4.1   | 121.1 | .2    | 144.0 | 6.3   | 181.1 | .6    | 292.1 | .3    |
| 50.0 | 6.3   | 66.0 | .3    | 83.9 | .2    | 103.0 | .7    | 122.0 | .8    | 144.9 | 1.4   | 185.1 | .3    | 308.1 | 2.2   |
| 51.0 | 16.2  | 67.0 | .4    | 84.9 | .4    | 104.0 | 1.2   | 123.1 | .3    | 146.0 | 4.8   | 186.0 | .2    | 309.1 | .3    |
| 52.0 | 2.2   | 68.0 | 1.7   | 85.5 | 2.7   | 105.0 | .8    | 124.0 | .4    | 147.0 | .5    | 189.0 | .5    | 310.0 | .2    |
| 53.0 | .7    | 69.0 | 1.7   | 86.0 | .9    | 106.0 | 45.6  | 126.0 | 2.9   | 149.0 | .3    | 202.1 | .2    | 310.2 | .2    |
| 54.0 | .2    | 70.0 | 1.7   | 86.5 | .5    | 107.0 | 5.9   | 127.0 | 8.2   | 151.0 | 4.9   | 217.0 | 1.3   | 337.4 | .4    |
| 54.5 | .3    | 71.0 | .2    | 87.0 | 1.0   | 108.0 | 1.9   | 128.0 | 3.2   | 152.0 | 1.3   | 218.0 | .8    |       |       |
| 55.0 | .5    | 72.0 | .4    | 88.0 | 1.2   | 109.0 | 1.8   | 129.0 | 14.8  | 153.0 | .7    | 219.2 | .2    |       |       |
| 56.0 | 1.5   | 73.0 | .6    | 89.0 | .7    | 110.0 | .4    | 129.3 | .3    | 154.0 | 1.1   | 245.0 | .2    |       |       |
| 57.0 | 2.6   | 74.0 | 1.3   | 90.0 | .3    | 111.0 | .3    | 130.0 | .9    | 155.0 | .4    | 255.2 | .4    |       |       |
| 57.9 | .2    | 75.0 | 2.9   | 91.0 | .4    | 112.0 | 3.3   | 131.0 | .3    | 163.1 | .2    | 256.3 | .2    |       |       |
| 58.0 | .5    | 76.0 | 2.2   | 92.0 | 1.8   | 113.0 | 15.4  | 134.0 | .3    | 166.0 | .2    | 266.3 | .2    |       |       |

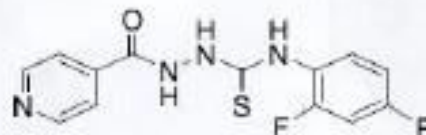

Compound 15

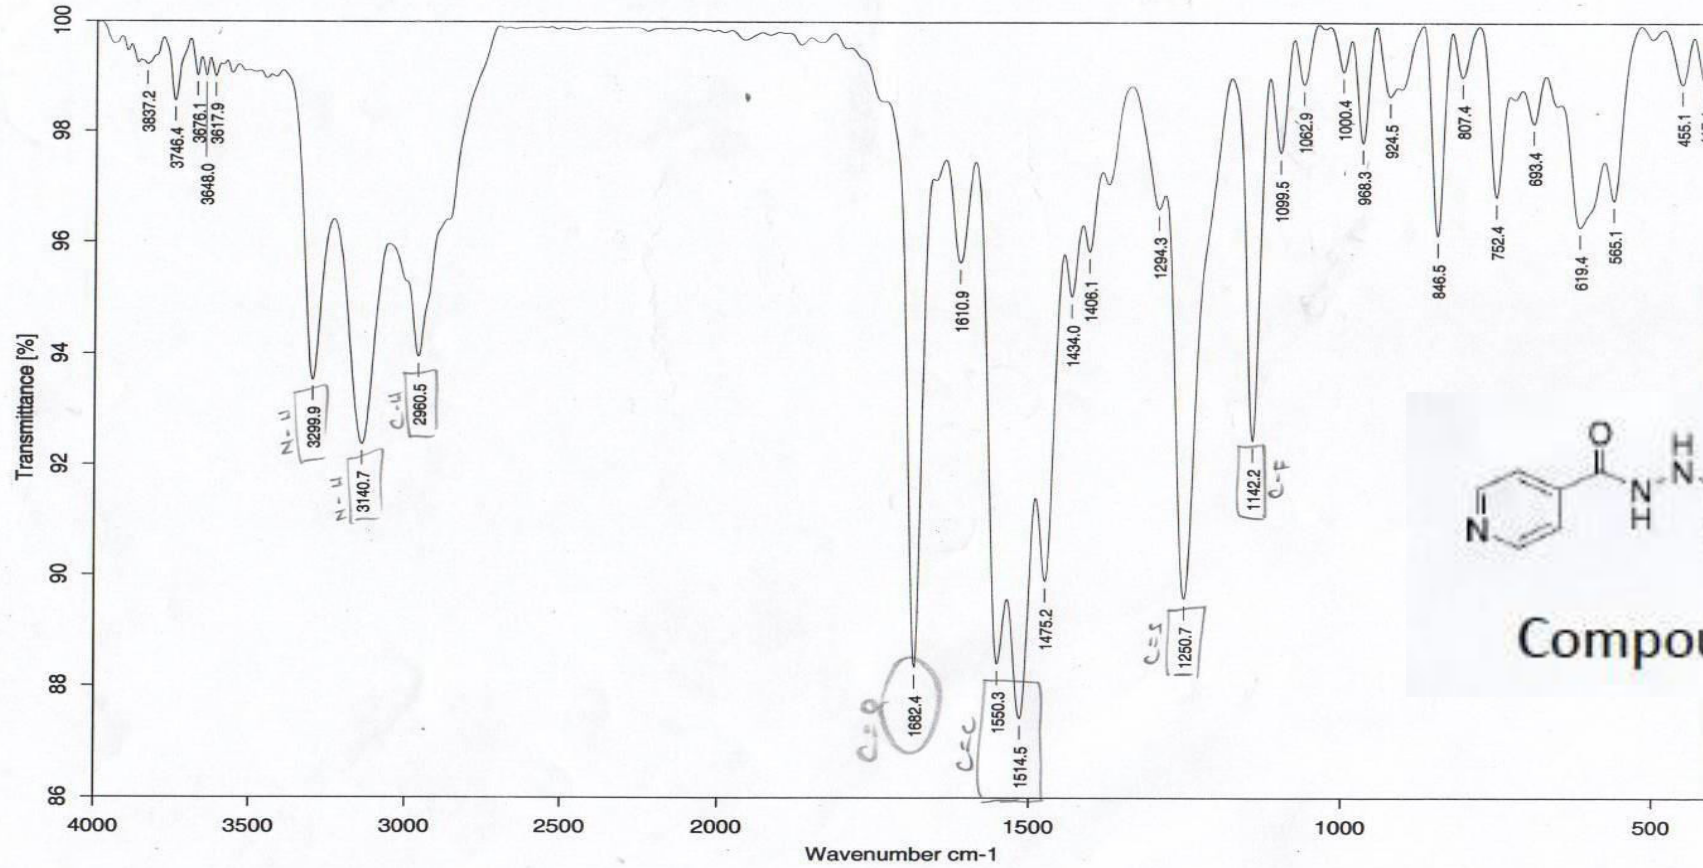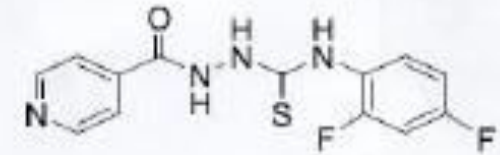

Compound 15

Sample : FZI-ISO1/Fazila Rizvi

Measured : 19/04/2017 on VECTOR22

Resolution : 4 cm<sup>-1</sup> ( 10 scans )

Spectrum : FZ-I-ISO1.0 ( in D:\IRSTUDENT )

Technic : Solid

Analyst : MA/ZA/JS

BUSHRA/DR.HINA/FZ.I.ISO.21  
1H

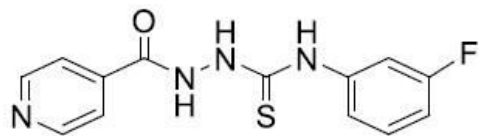

Compound 16

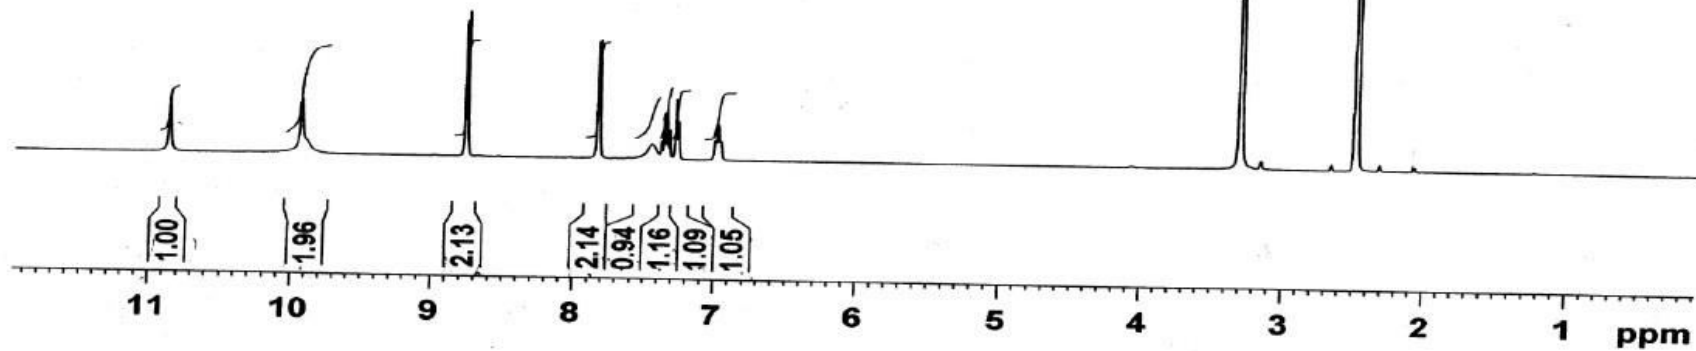

AVANCE AV-400 MHz  
Lab # 115

```
NAME      oct06-16
EXPNO     7
PROCNO    1
Date_     20161006
Time      15.32
INSTRUM   spect
PROBHD    5 mm SEI 1H-13
PULPROG   zg30
TD        65536
SOLVENT   DMSO
NS        128
DS        0
SWH       8012.820 Hz
FIDRES    0.122266 Hz
AQ        4.0894966 sec
RG        362
DW        62.400 usec
DE        6.50 usec
TE        300.0 K
D1        1.50000000 sec
TDO       1
```

```
----- CHANNEL f1 -----
NUC1      1H
P1        10.80 usec
PL1       3.00 dB
SFO1     400.0332002 MHz
SI        32768
SF        400.0300041 MHz
WDW       EM
SSB       0
LB        0.30 Hz
GB        0
PC        0.20
```

File: FZ-I-ISO21-FABN  
Sample: BUSHRA QAMAR /DR. HINA  
Instrument: JEOL-600H-2  
Inlet: Direct Probe

Date Run: 10-19-2016 (Time Run: 15:44:52)

Ionization mode: FAB-

Scan: 10

R.T.: .8

#Ions: 427

Base: m/z 183; 59.2%FS TIC: 2167114

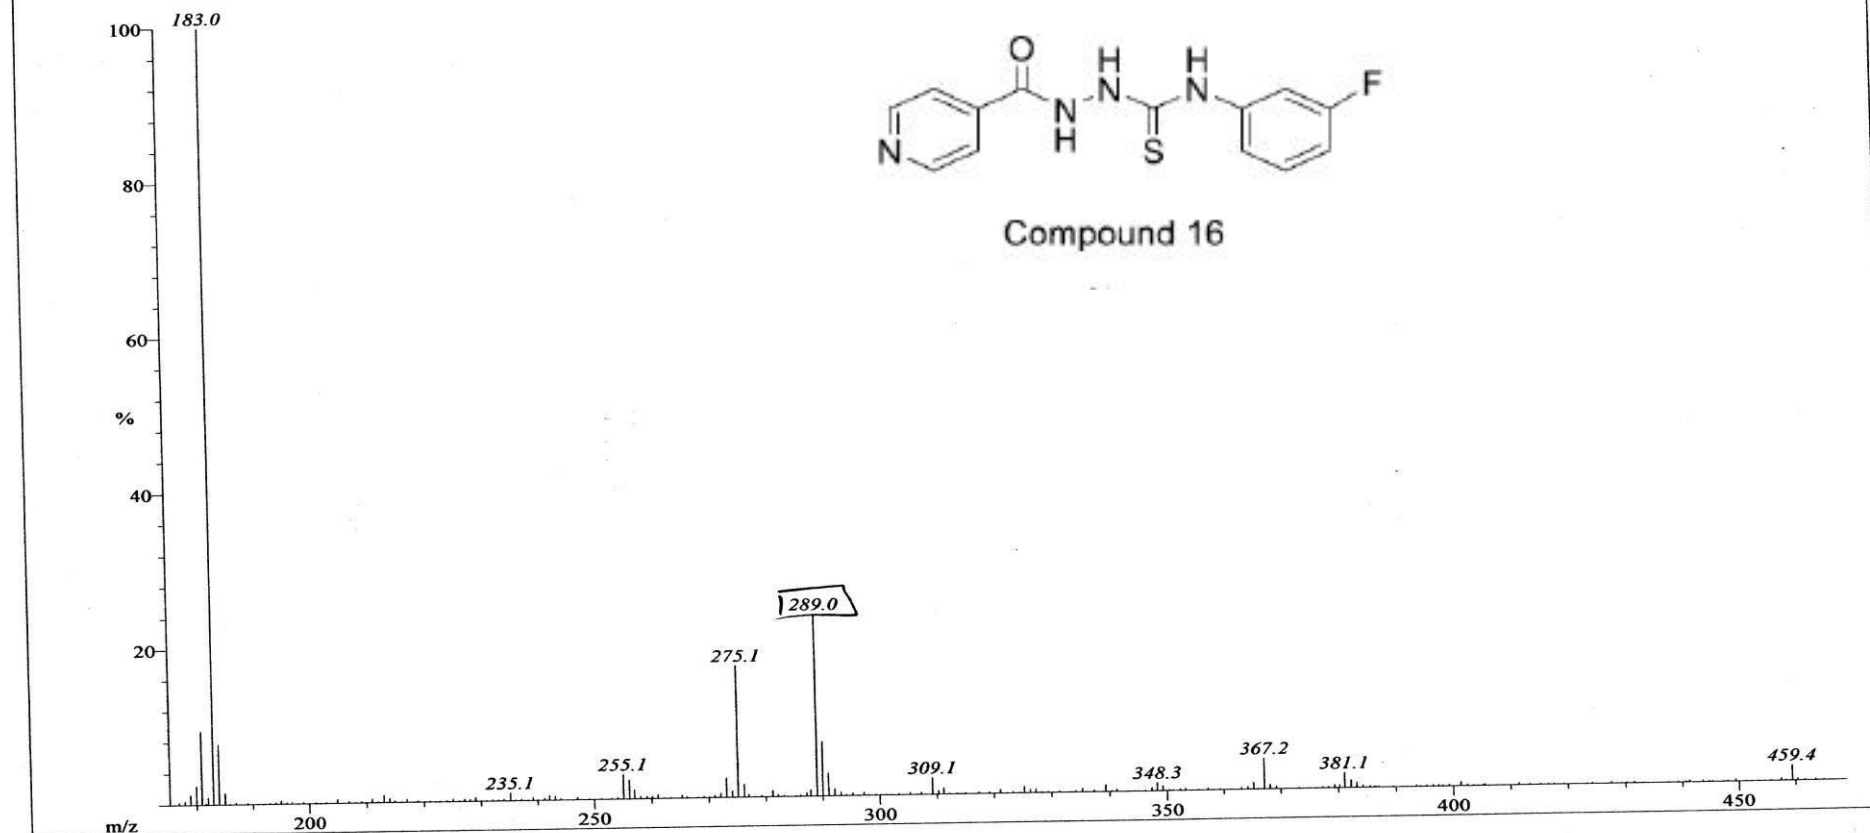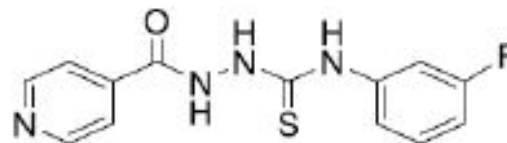

Compound 16

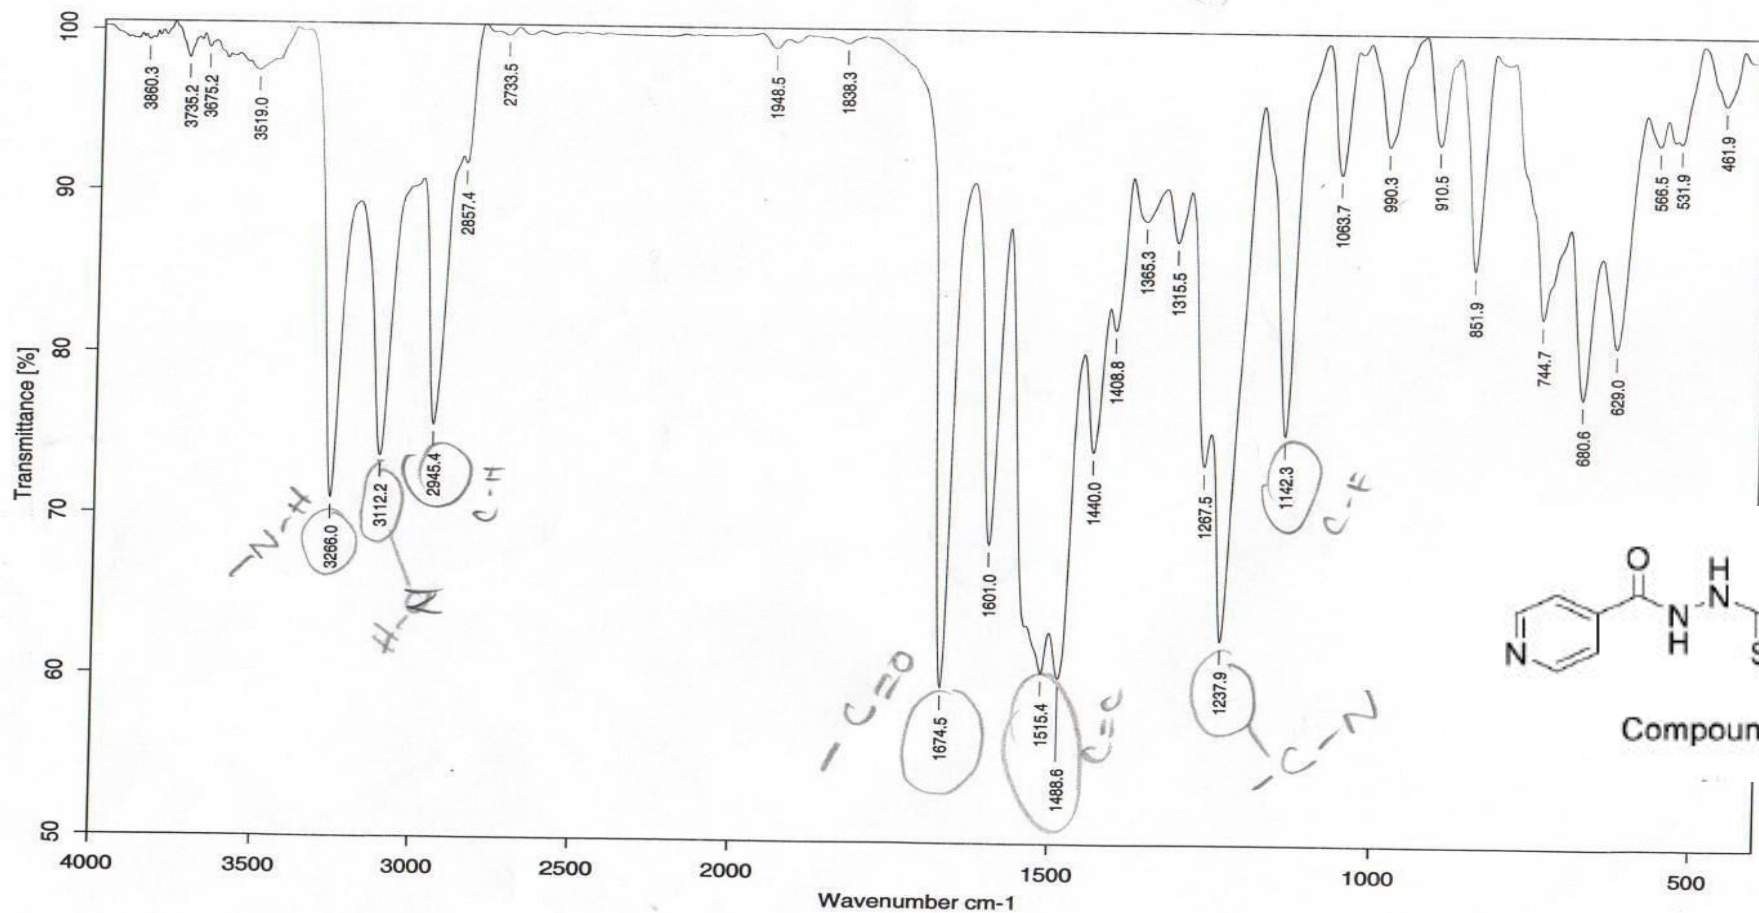

Sample : Fz-I-Iso21/Fazila Rizvi/Dr. Hina

Measured : 29/12/2016 on VECTOR22

Resolution : 4  $\text{cm}^{-1}$  ( 10 scans )

Spectrum : Fz-I-Iso21.0 ( in D:\IRSTUDENT )

Technic : Solid

Analyst : M. Asif

AVANCE AV-400 MHz  
Lab # 115

BUSHRA/DR.HINA/FZ.I.ISO.22  
1H

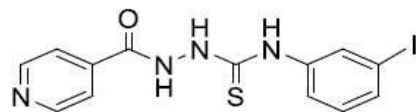

Compound 17

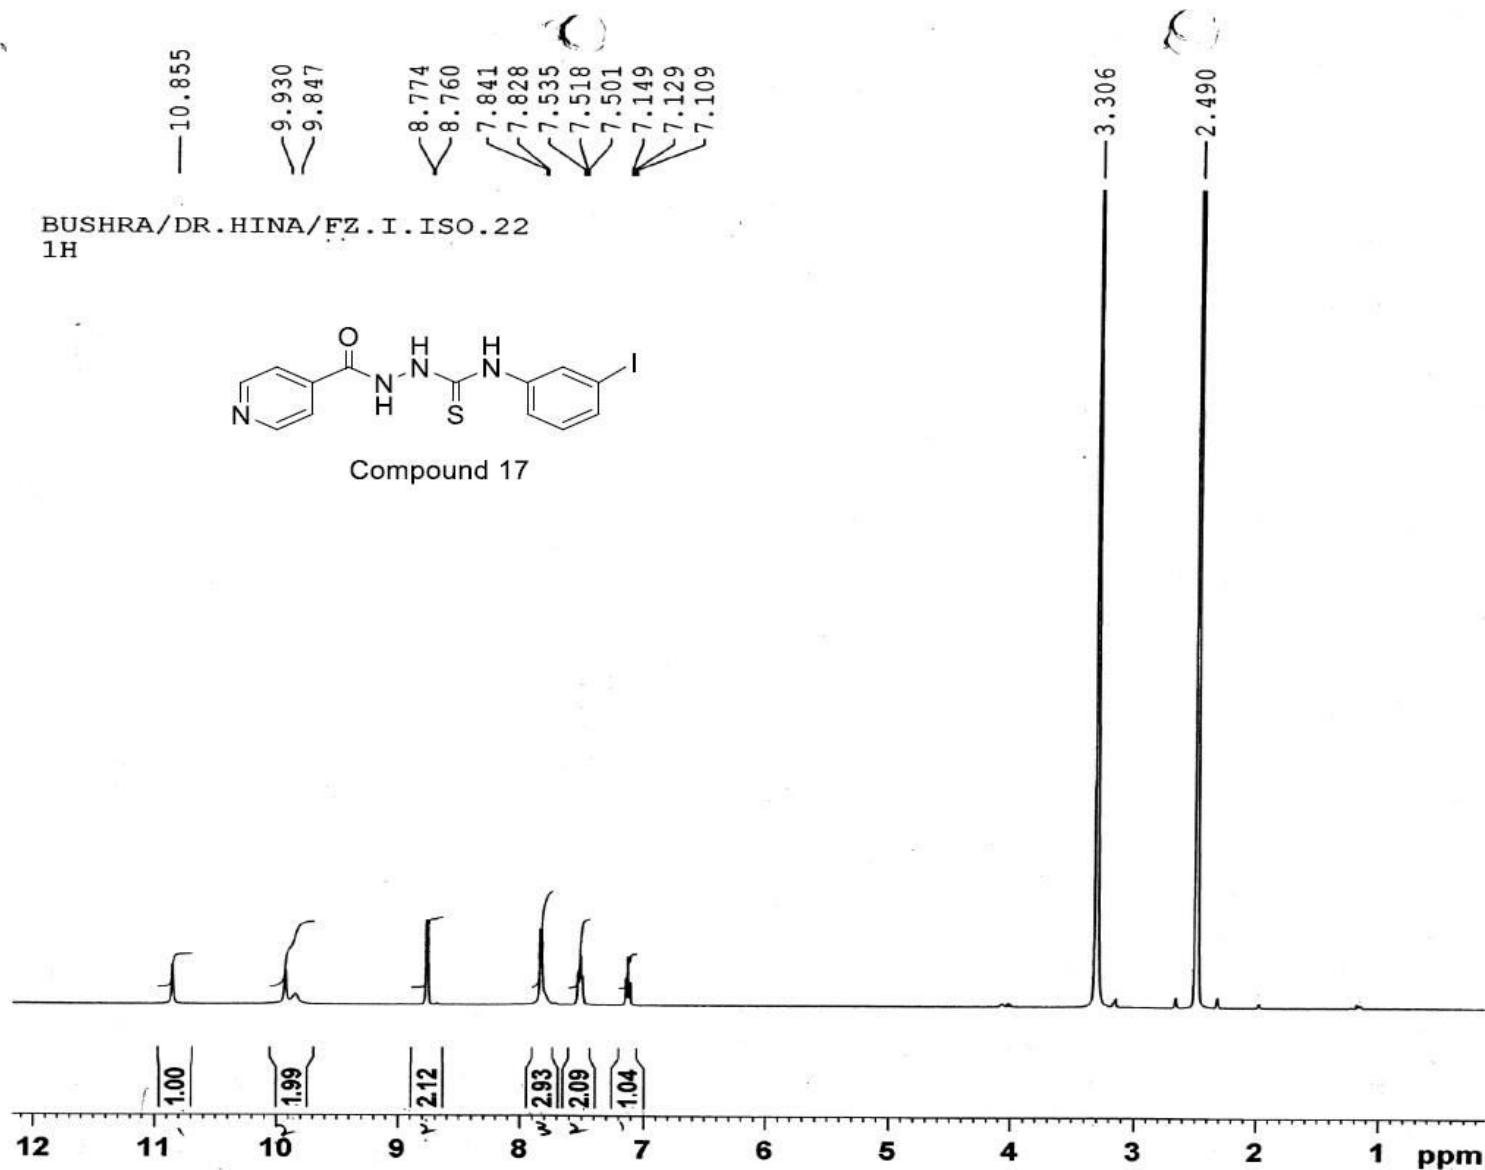

```

NAME          oct06-16
EXPNO         6
PROCNO        1
Date_         20161006
Time_         15.15
INSTRUM       spect
PROBHD        5 mm SEI 1H-13
PULPROG       zg30
TD            65536
SOLVENT       DMSO
NS            128
DS            0
SWH           8012.820 Hz
FIDRES        0.122266 Hz
AQ            4.0894966 sec
RG            574.7
DW            62.400 usec
DE            6.50 usec
TE            300.0 K
D1            1.5000000 sec
TD0           1
  
```

```

===== CHANNEL f1 =====
NUC1          1H
P1            10.80 usec
PL1           3.00 dB
SF01          400.0332002 MHz
SI            32768
SF            400.0300041 MHz
WDW           EM
SSB           0
LB            0.30 Hz
GB            0
PC            0.20
  
```



File: FZ-I-ISO22-FABN  
Sample: BUSHRA QAMAR /DR. HINA  
Instrument: JEOL-600H-2  
Inlet: Direct Probe

Date Run: 10-19-2016 (Time Run: 15:28:48)

Ionization mode: FAB-

Scan: 8

Base: m/z 183; 73.8%FS TIC: 2944182

R.T.: .62

#Ions: 565

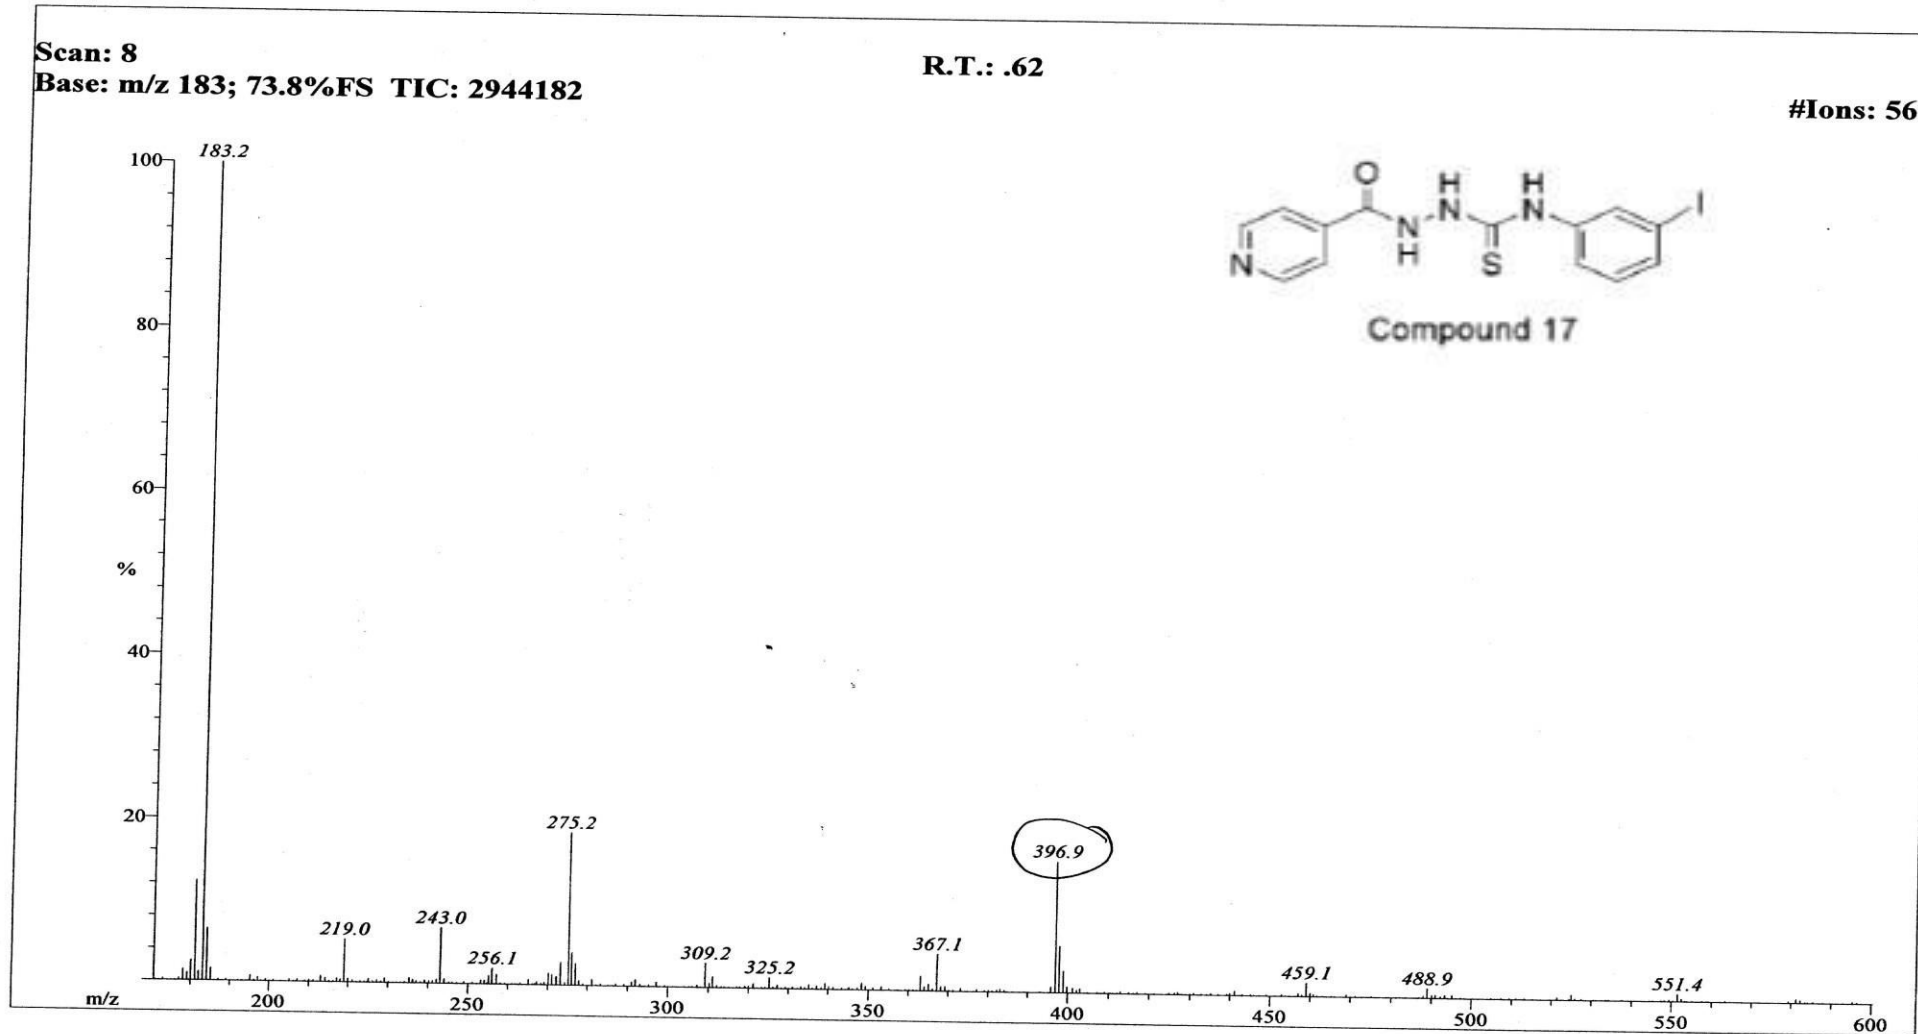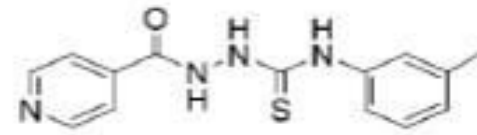

Compound 17

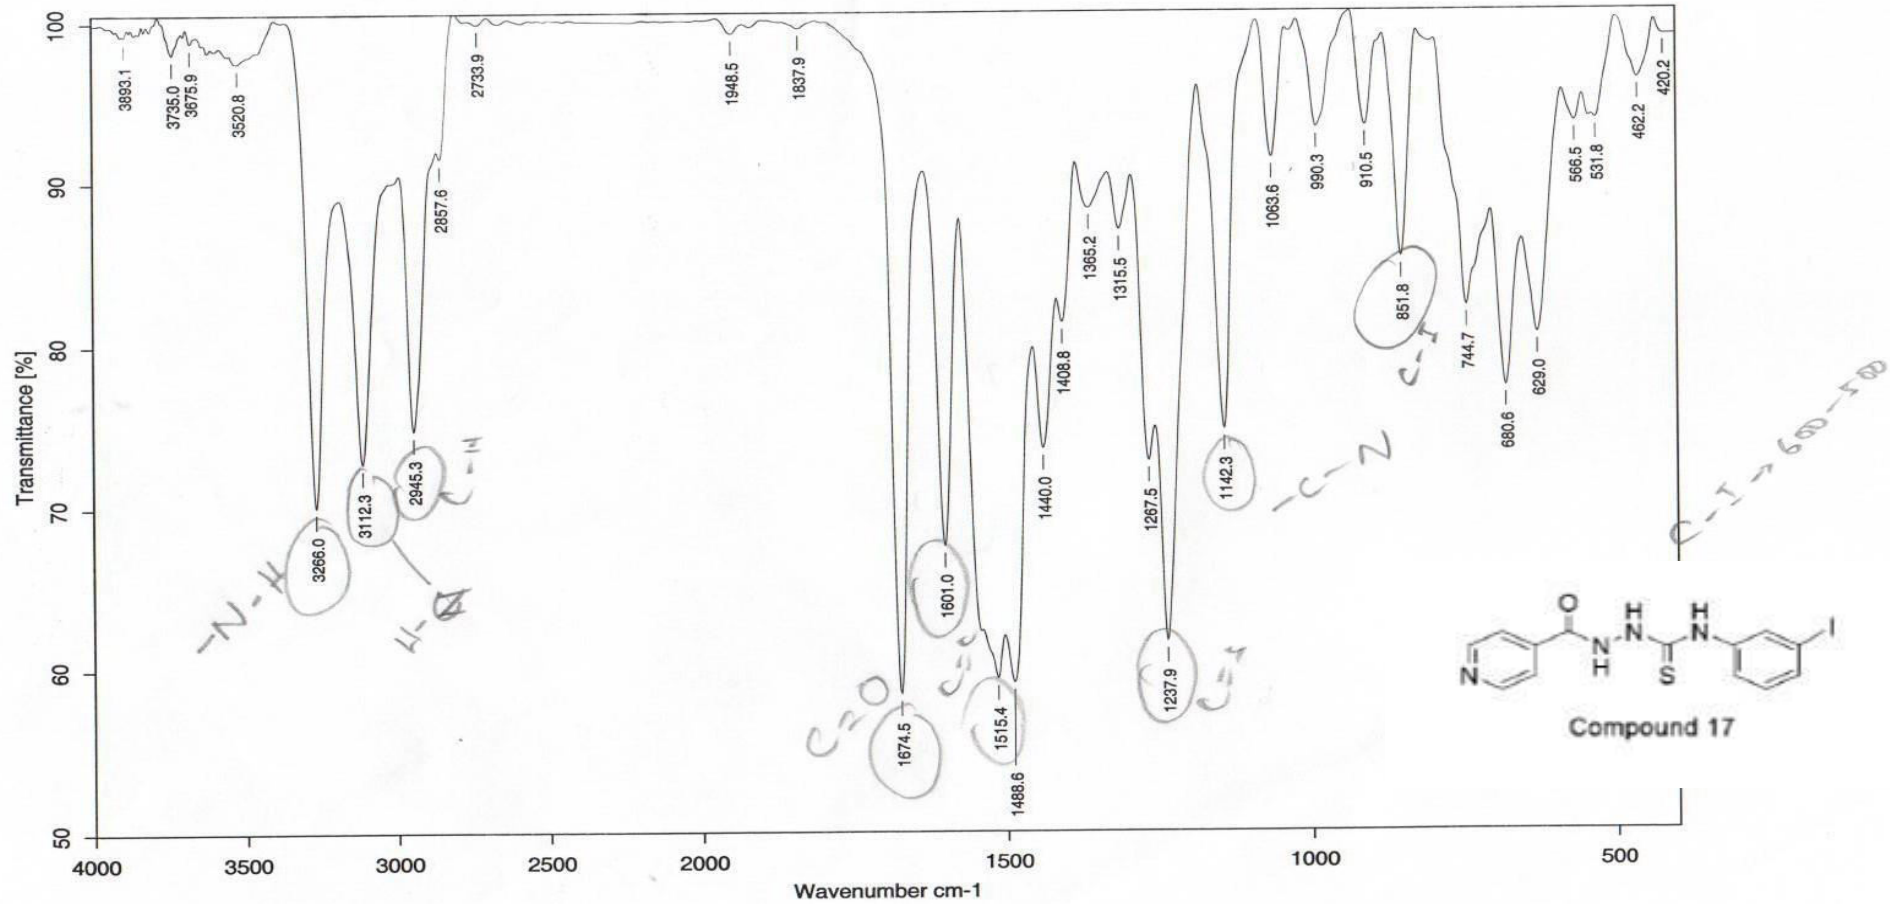

Sample : Fz-I-Iso22/Fazila Rizvi/Dr. Hina

Measured : 29/12/2016 on VECTOR22

Resolution : 4 cm<sup>-1</sup> ( 10 scans )

Spectrum : Fz-I-Iso22.0 ( in D:\IRSTUDENT )

Technic : Solid

Analyst : M. Asif

fazila rizvi/Dr.Hina/Fz-I-iso23

<sup>1</sup>H

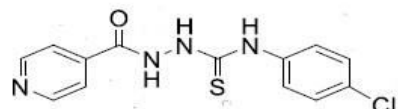

Compound 18

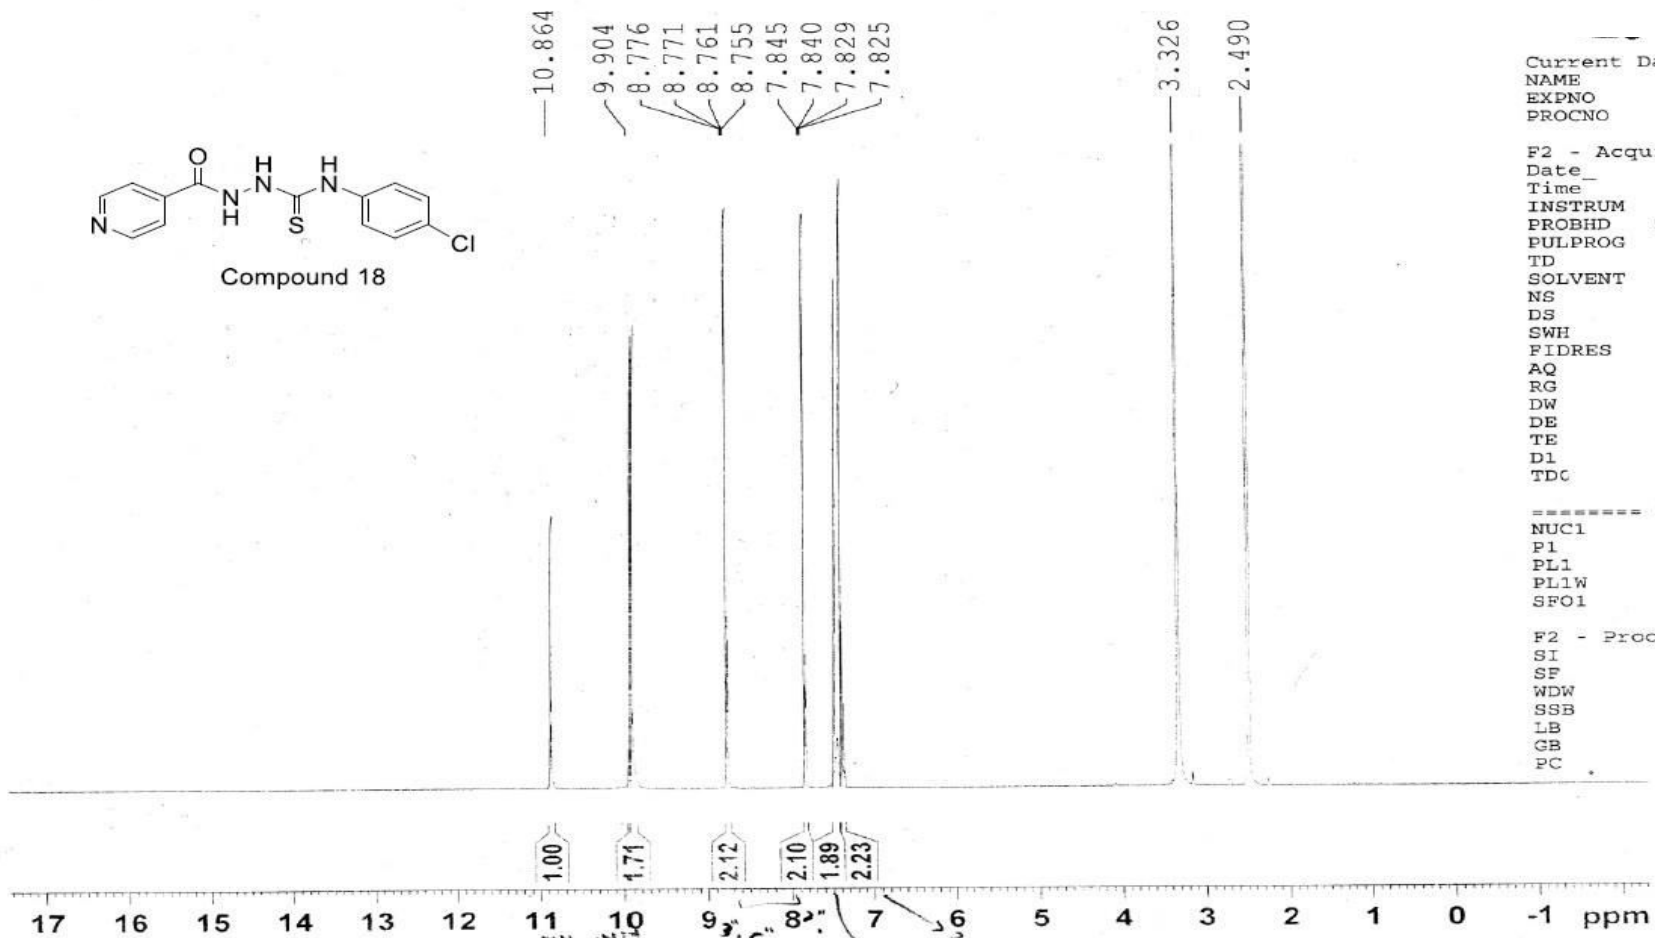

Current Data Parameters  
NAME iso23  
EXPNO 4  
PROCNO 1

F2 - Acquisition Parameters  
Date 20161117  
Time 11.36  
INSTRUM Spect  
PROBHD 5 mm BBO BB-1H  
PULPROG zg30  
TD 32768  
SOLVENT DMSO  
NS 64  
DS 0  
SWH 6188.119 Hz  
FIDRES 0.188846 Hz  
AQ 2.6476543 sec  
RG 203  
DW 80.800 usec  
DE 6.50 usec  
TE 300.0 K  
D1 2.00000000 sec  
TDC 1

===== CHANNEL f1 =====  
NUC1 <sup>1</sup>H  
P1 12.50 usec  
PL1 0 dB  
PL1W 13.16228485 W  
SFO1 300.1324010 MHz

F2 - Processing parameters  
SI 32768  
SF 300.1300040 MHz  
WDW EM  
SSB 0  
LB 0.30 Hz  
GB 0  
PC 1.00

fazila rizvi/Dr.Hina/Fz-I-iso23  
'<sup>1</sup>H

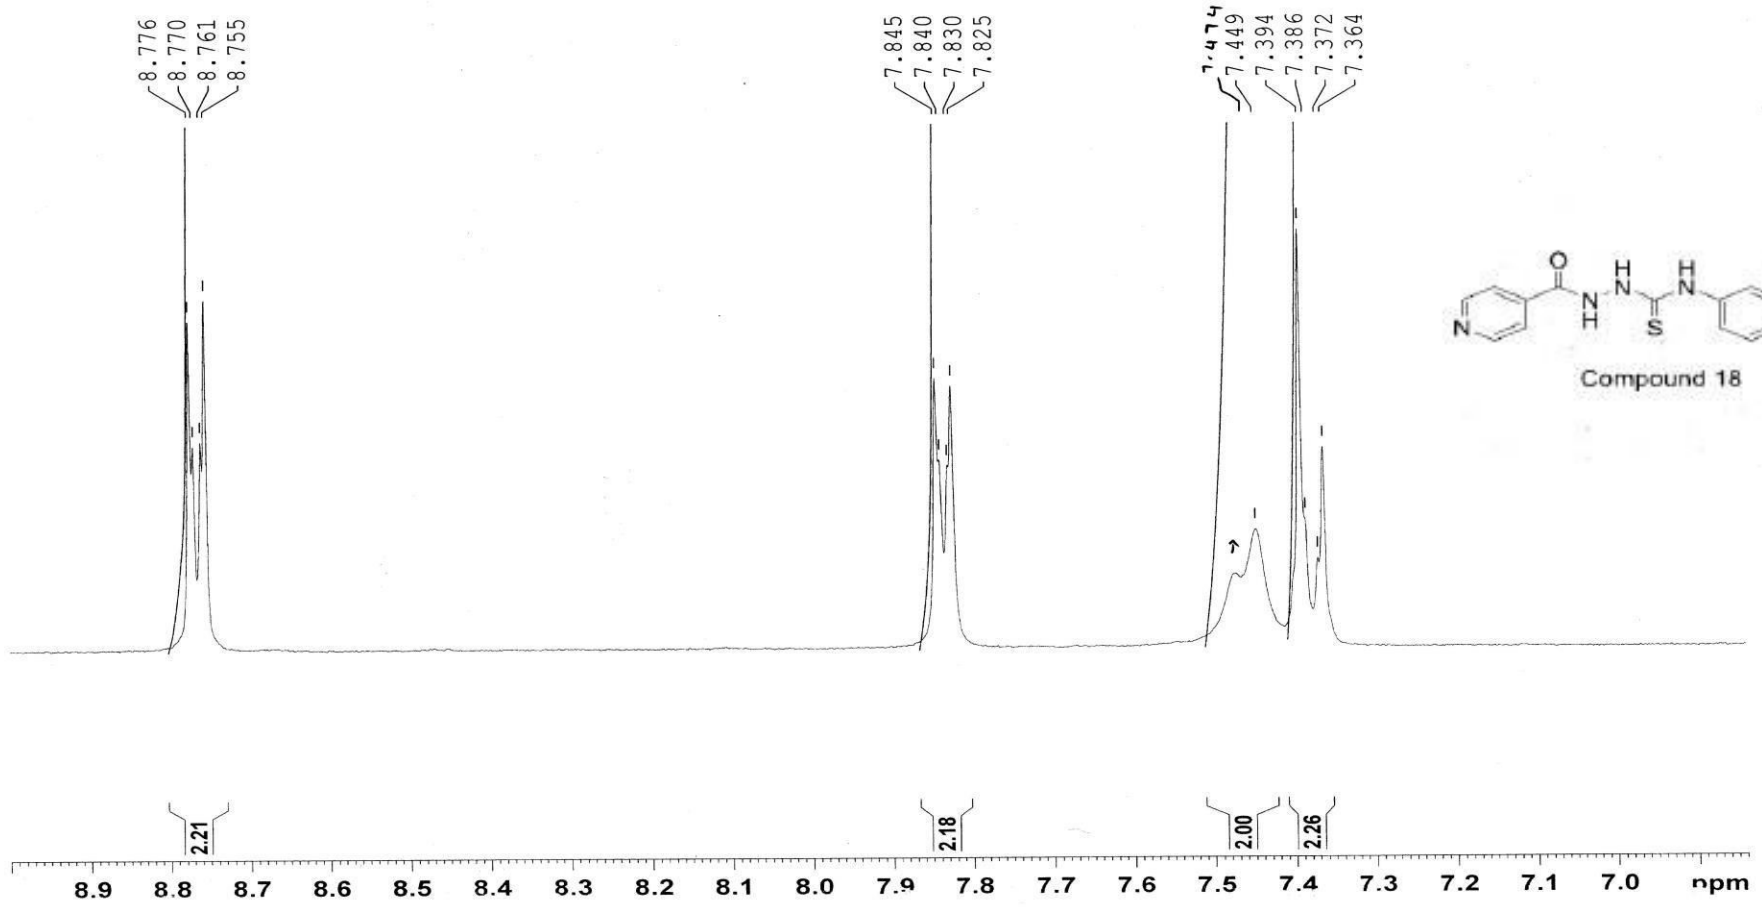

File: FZ-I-SO23-FABN  
Sample: BUSHRA QAMAR /DR. HINA  
Instrument: JEOL-600H-2  
Inlet: Direct Probe

Date Run: 10-19-2016 (Time Run: 15:52:27)

Ionization mode: FAB-

Scan: 8  
Base: m/z 183; 51.4%FS TIC: 1986322

R.T.: .62

#Ions: 591

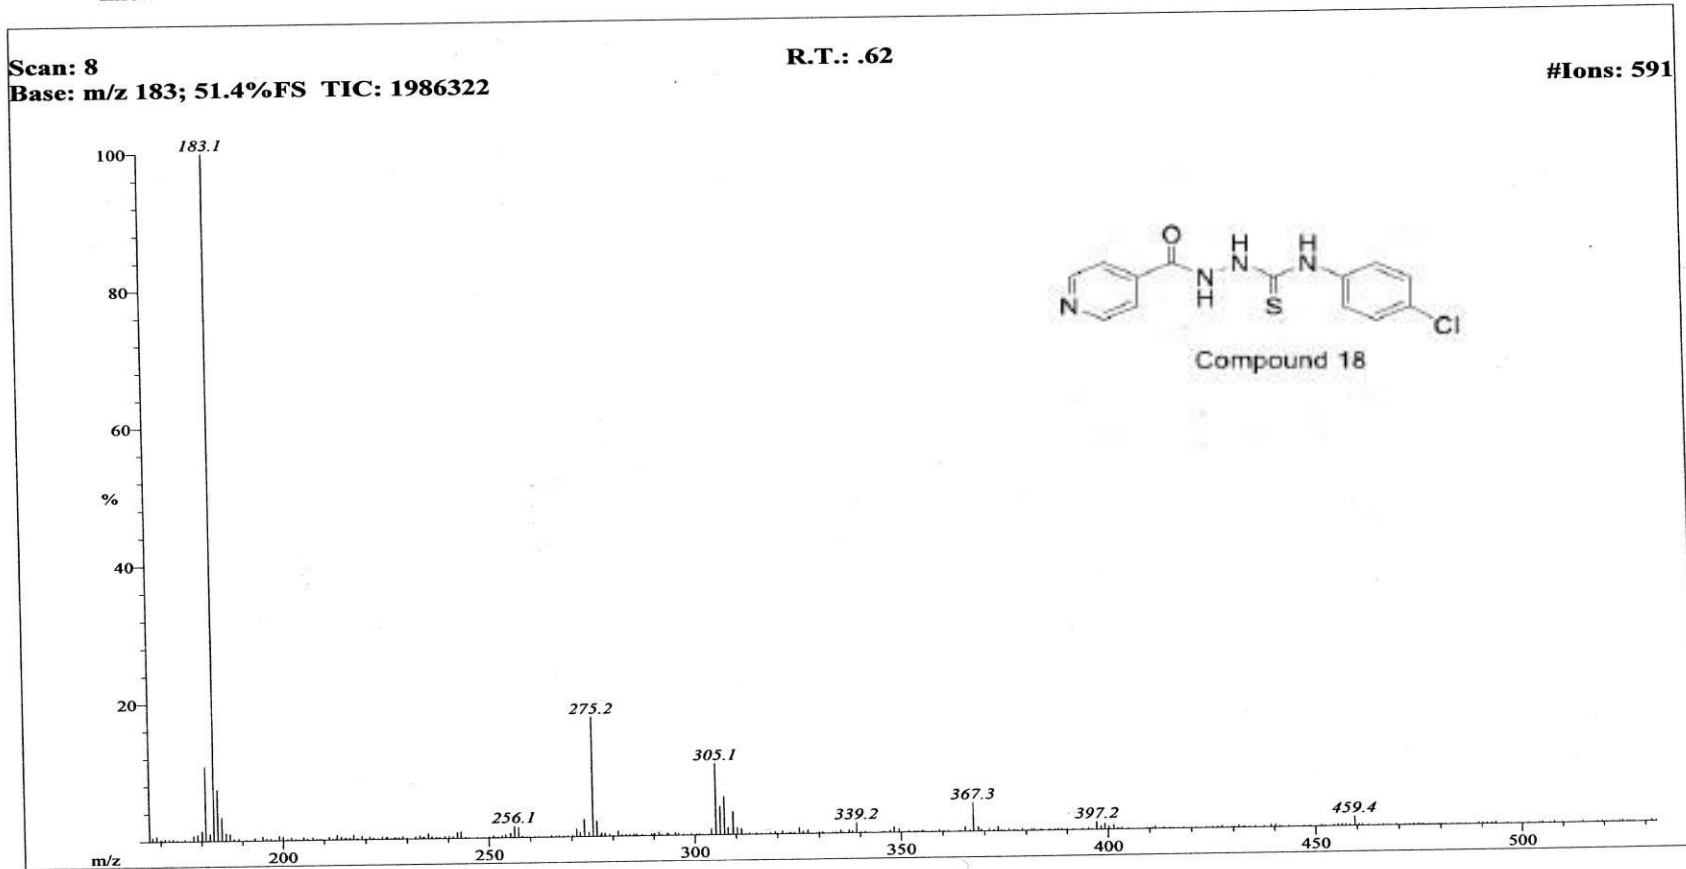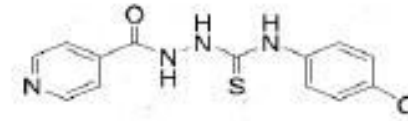

Compound 18

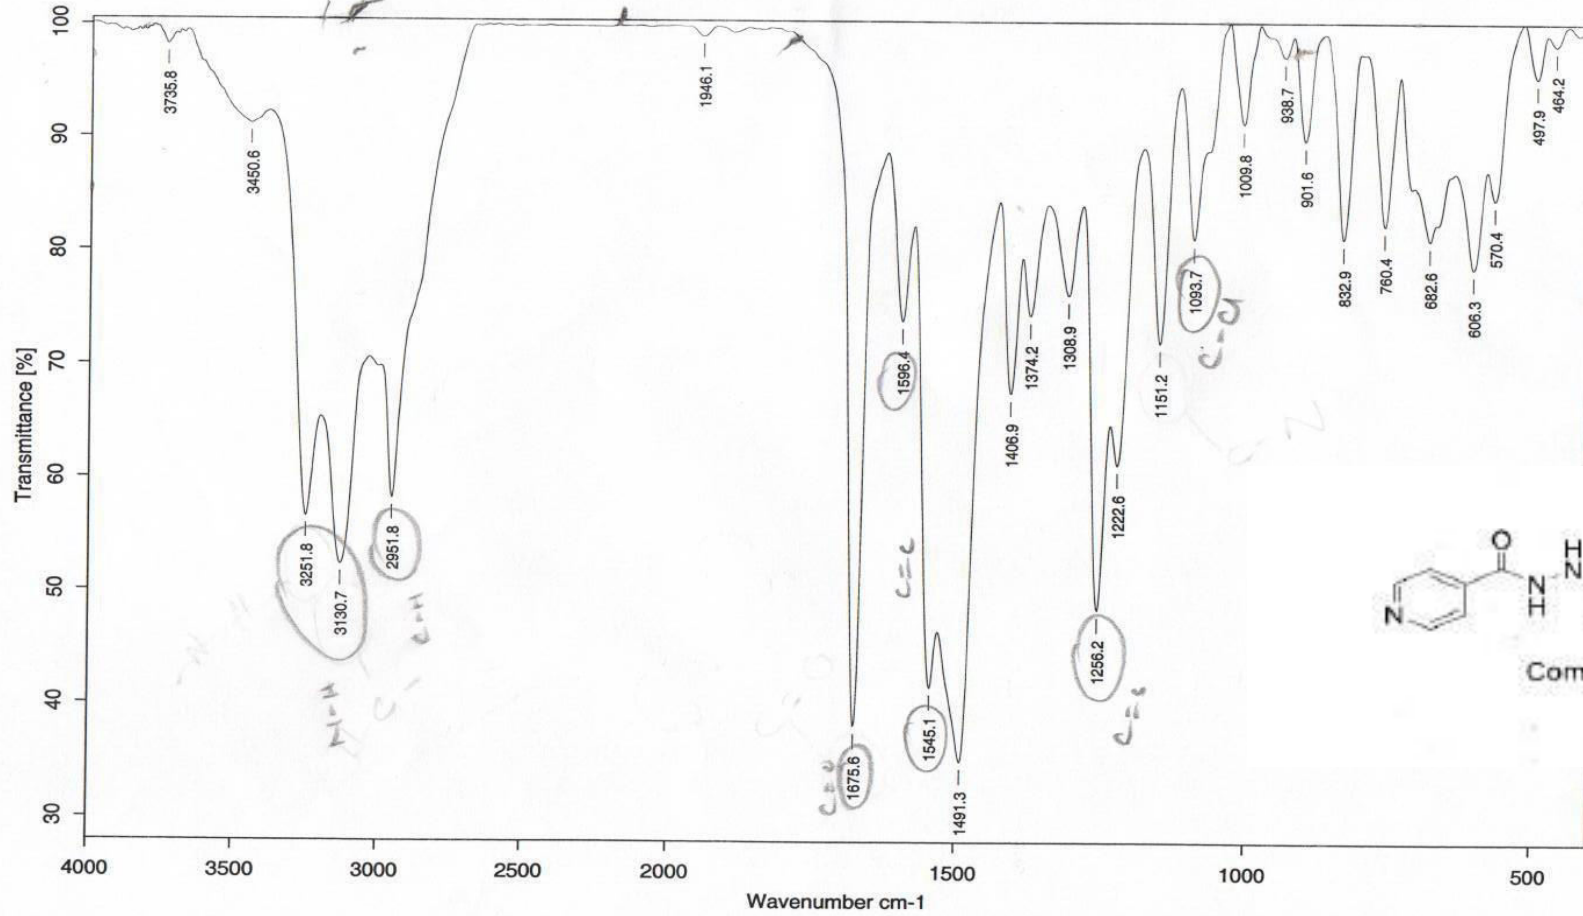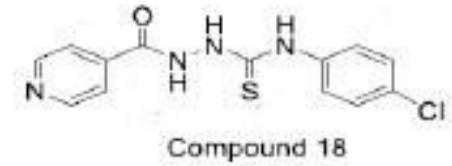

Sample : Fz-I-Iso23/Fazila Rizvi/Dr. Hina  
 Measured : 29/12/2016 on VECTOR22  
 Resolution : 4 cm<sup>-1</sup> ( 10 scans )  
 Spectrum : Fz-I-Iso23.0 ( in D:\IRSTUDENT )  
 Technic : Solid  
 Analyst : M. Asif

BUSHRA/DR, HINA/FZ-I-ISO-24  
 ICCBS, U.O.K/

AVANCE 400  
 LAB NO 117

—10.842  
 —9.829  
 {8.769  
 {8.766  
 {8.754  
 {7.843  
 {7.829  
 {7.397  
 {7.181  
 {7.159  
 {7.137

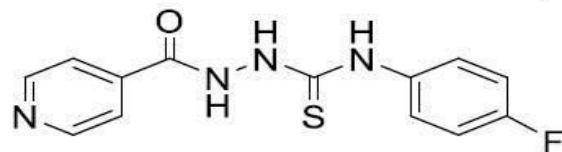

Compound 19

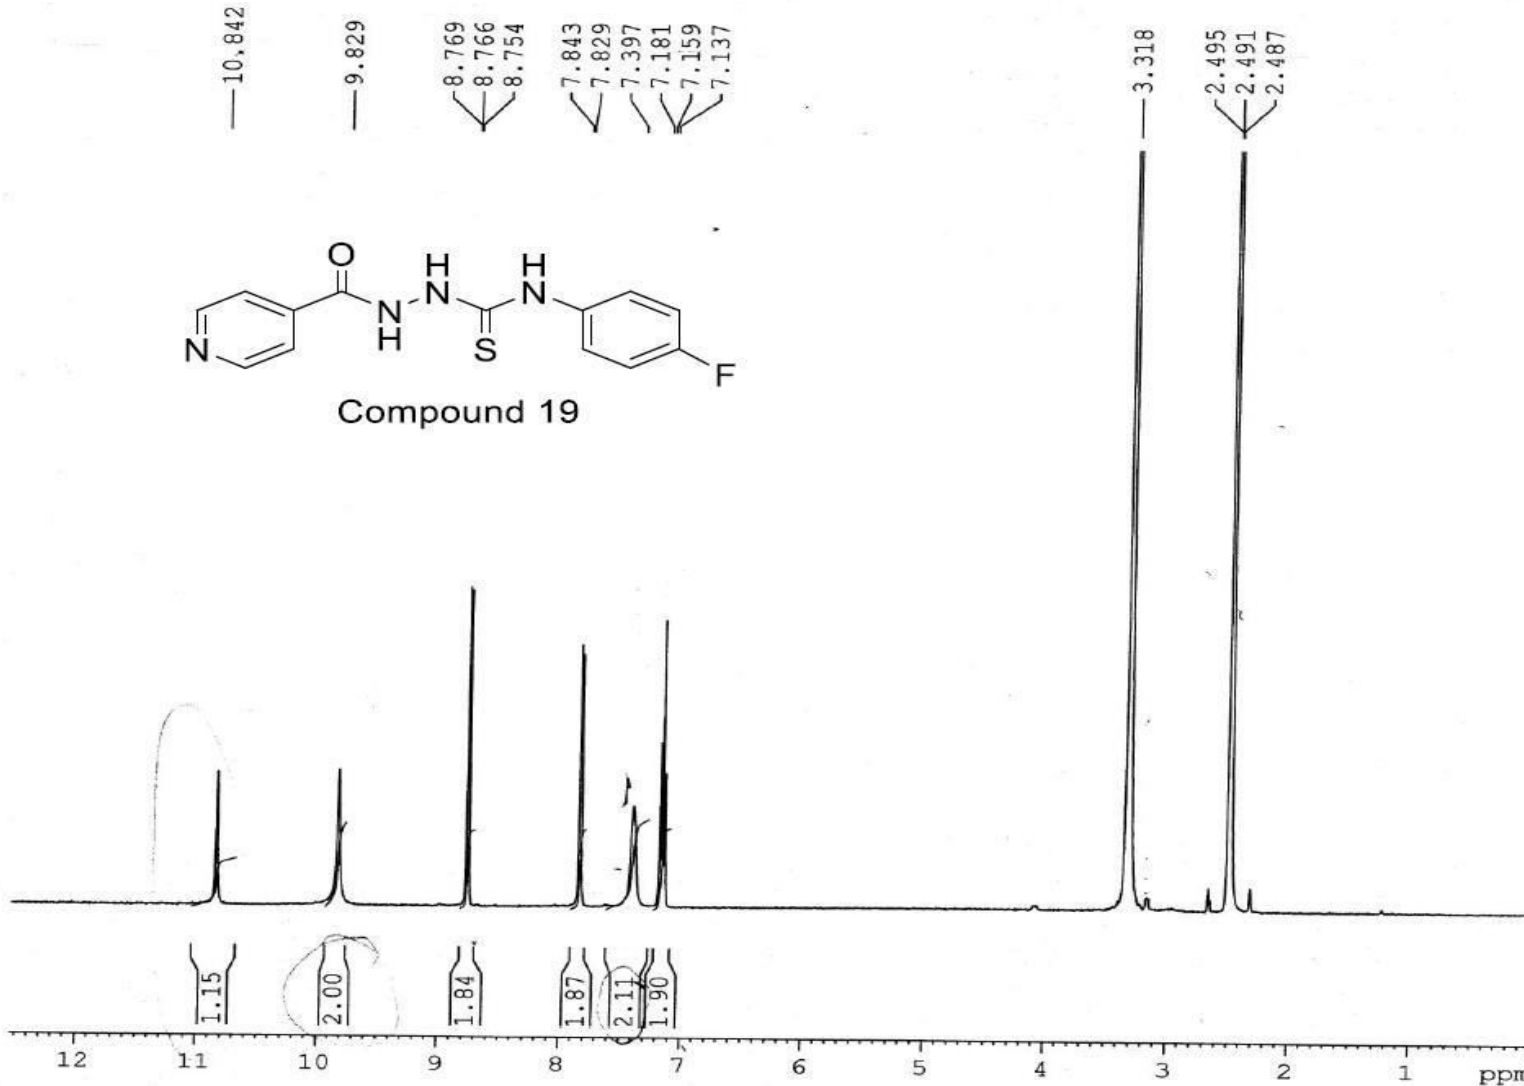

NAME Oct10-16  
 EXPNO 4  
 PROCNO 1  
 Date 20161010  
 Time 11.03  
 INSTRUM spect  
 PROBHD 5 mm DUL 13C-1  
 PULPROG zg30  
 TD 32768  
 SOLVENT DMSO  
 NS 64  
 DS 0  
 SWH 8012.820 Hz  
 FIDRES 0.244532 Hz  
 AQ 2.0447731 sec  
 RG 512  
 DW 62.400 usec  
 DE 6.50 usec  
 TE 300.0 K  
 D1 2.00000000 sec  
 TDO 1

===== CHANNEL f1 =====  
 NUC1 1H  
 P1 8.40 usec  
 PL1 0.00 dB  
 SFO1 400.1332010 MHz  
 SI 16384  
 SF 400.1300064 MHz  
 WDW EM  
 SSB 0  
 LB 0.30 Hz  
 GB 0  
 PC 1.00

File: FZ-I-ISO24-FABN  
Sample: BUSHRA QAMAR /DR. HINA  
Instrument: JEOL-600H-2  
Inlet: Direct Probe

Date Run: 10-19-2016 (Time Run: 15:36:52)

Ionization mode: FAB-

Scan: 7

R.T.: .53

#Ions: 564

Base: m/z 183; 45.7%FS TIC: 2412440

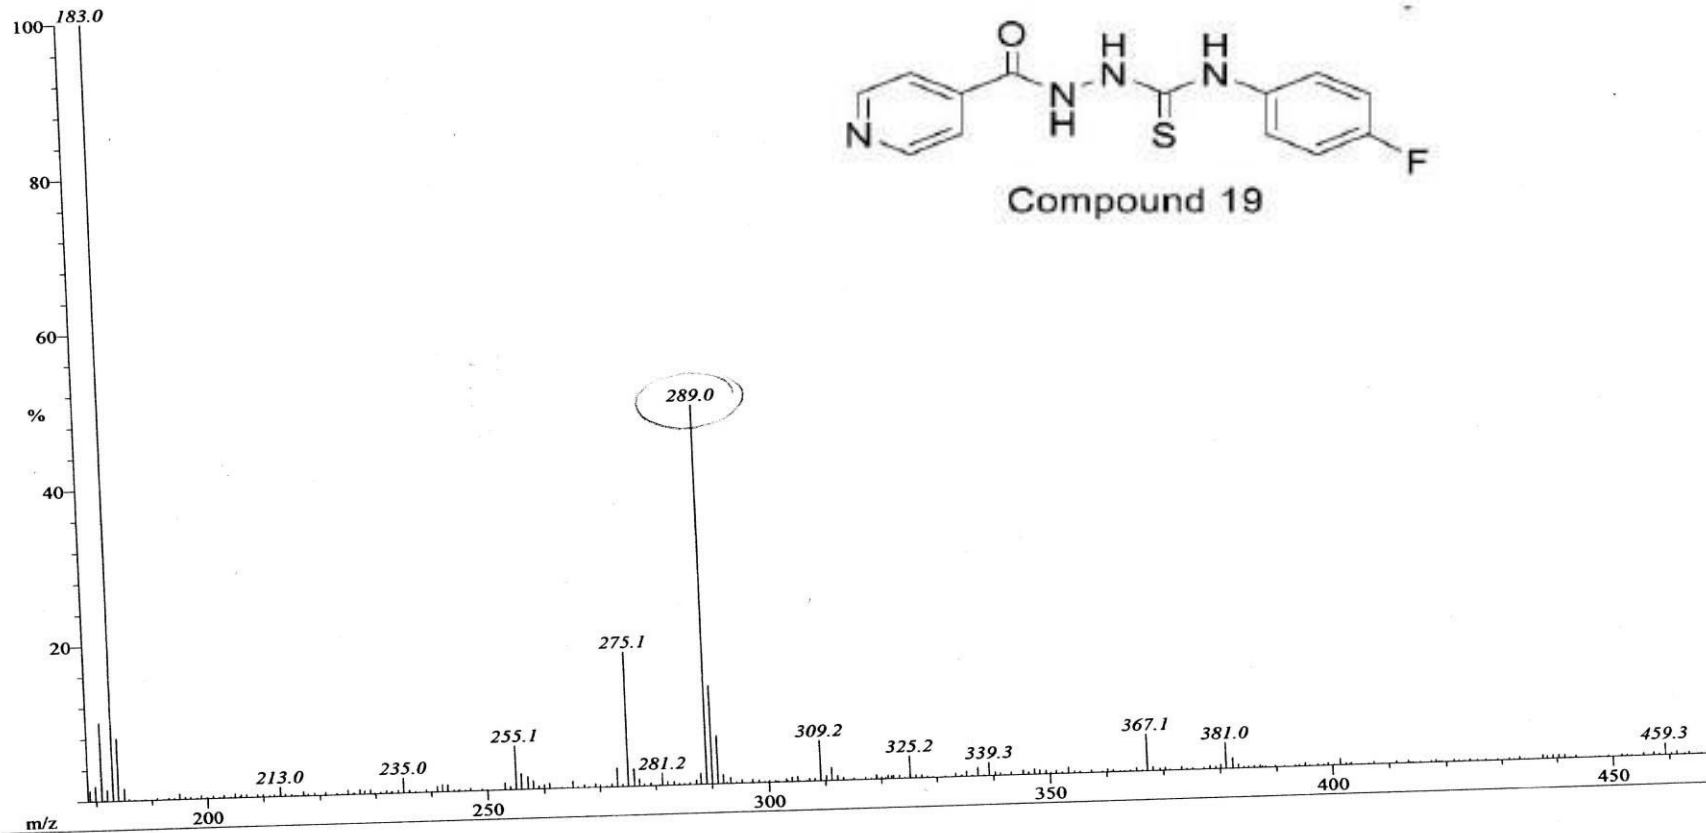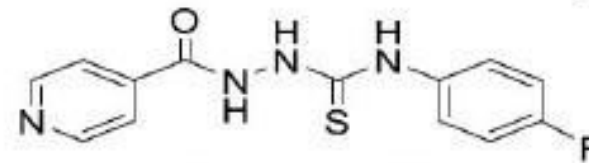

Compound 19



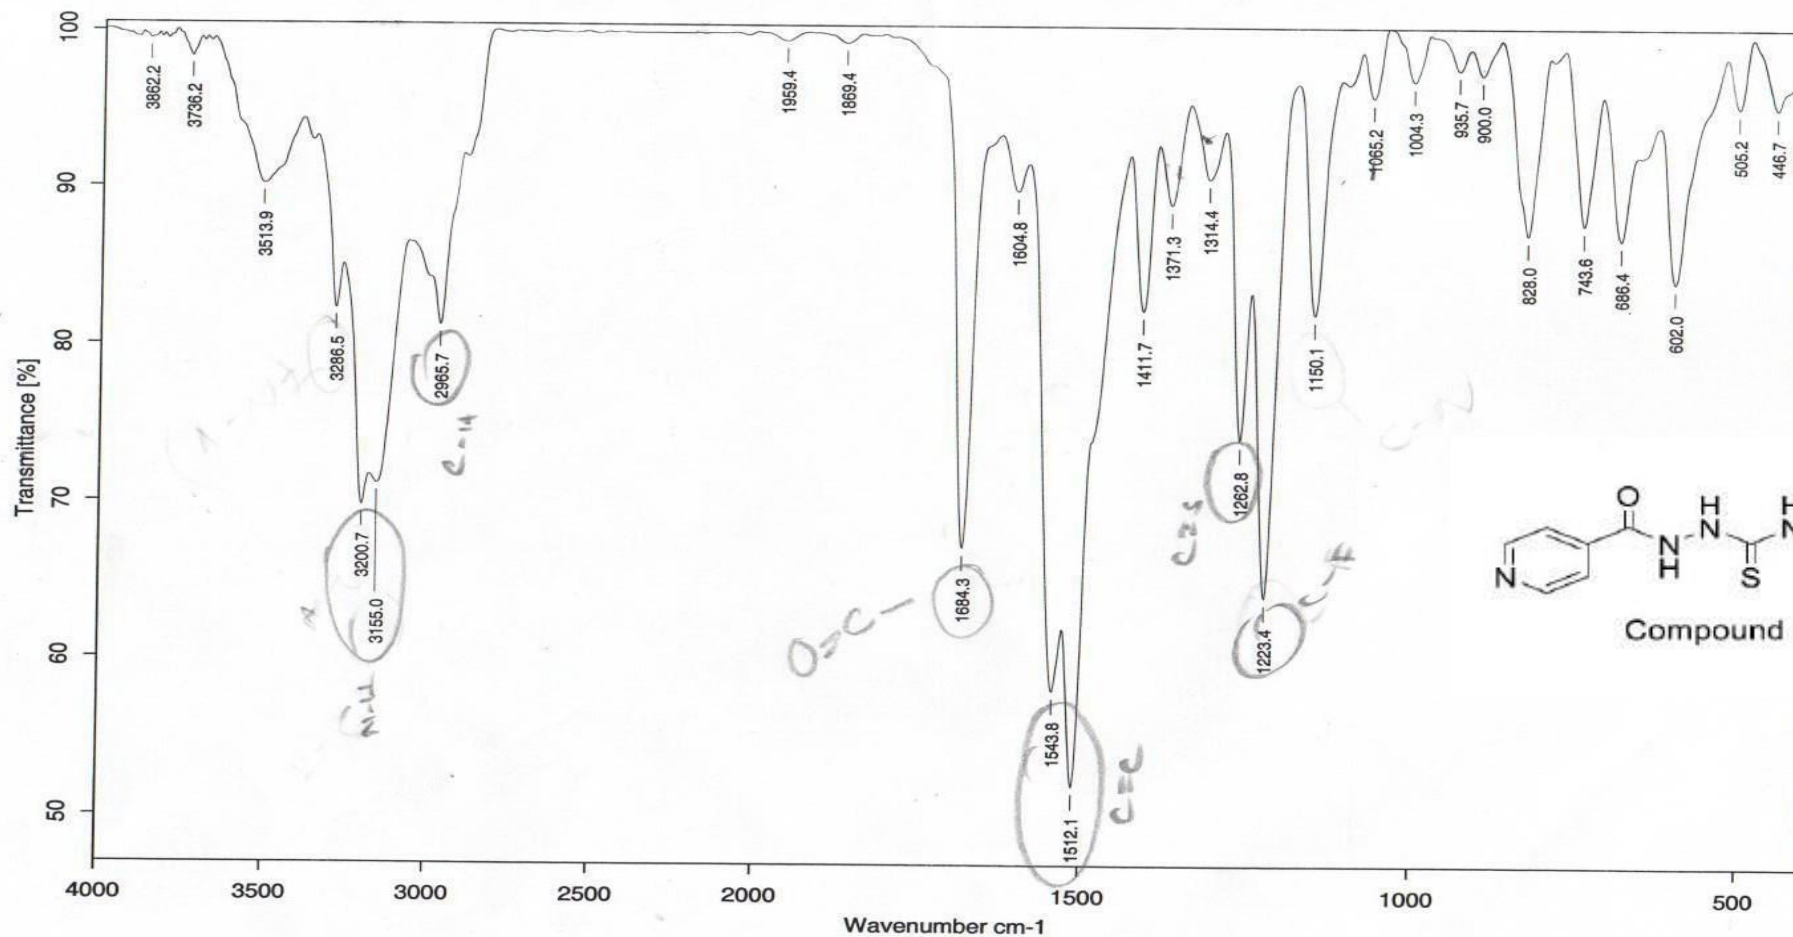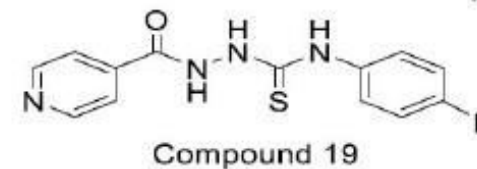

Sample : Fz-I-Iso24/Fazila Rizvi/Dr. Hina

Measured : 29/12/2016 on VECTOR22

Resolution : 4  $\text{cm}^{-1}$  ( 10 scans )

Spectrum : Fz-I-Iso24.0 ( in D:\IRSTUDENT )

Technic : Solid

Analyst : M. Asif

BUSHRA/DR, HINA/FZ-I-ISO-25/  
 ICCBS, U.O.K/

AVANCE 400  
 LAB NO 117

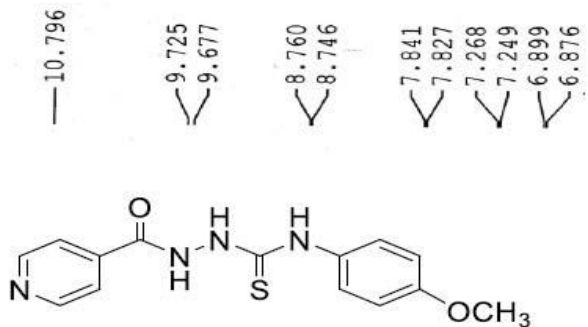

NAME nov01-16  
 EXPNO 2  
 PROCNO 1  
 Date\_ 20161101  
 Time\_ 11.07  
 INSTRUM spect  
 PROBHD 5 mm DUL 13C-1  
 PULPROG zg30  
 TD 32768  
 SOLVENT DMSO  
 NS 64  
 DS 0  
 SWH 8012.820 Hz  
 FIDRES 0.244532 Hz  
 AQ 2.0447731 sec  
 RG 512  
 DW 62.400 usec  
 DE 6.50 usec  
 TE 300.0 K  
 D1 2.00000000 sec  
 TDO 1

===== CHANNEL f1 =====  
 NUC1 1H  
 P1 8.40 usec  
 PL1 0.00 dB  
 SFO1 400.1332010 MHz  
 SI 16384  
 SF 400.1300064 MHz  
 WDW EM  
 SSB 0  
 LB 0.30 Hz  
 GB 0  
 PC 1.00

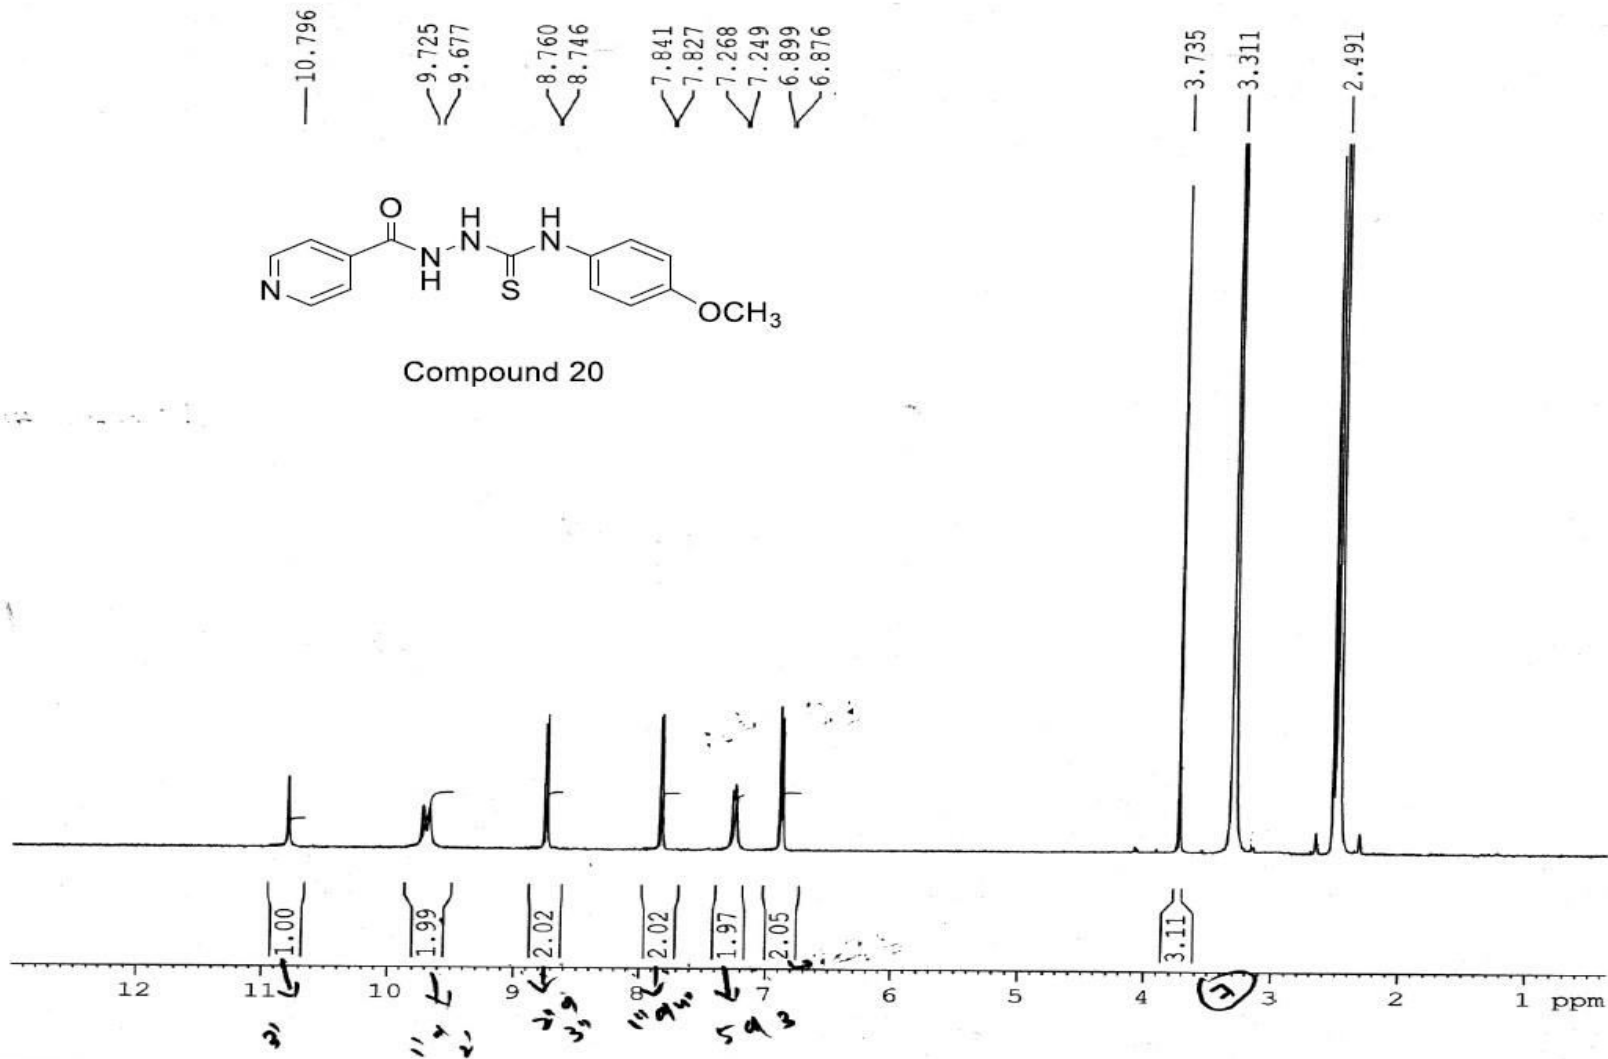

BUSHRA/DR, HINA/FZ-I-ISO-25/  
ICCBS, U.O.K/

10.796

9.725  
9.677

8.760  
8.746

7.841  
7.827

7.268  
7.249

6.899  
6.876

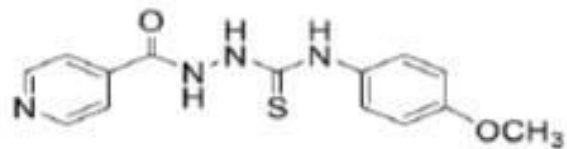

Compound 20

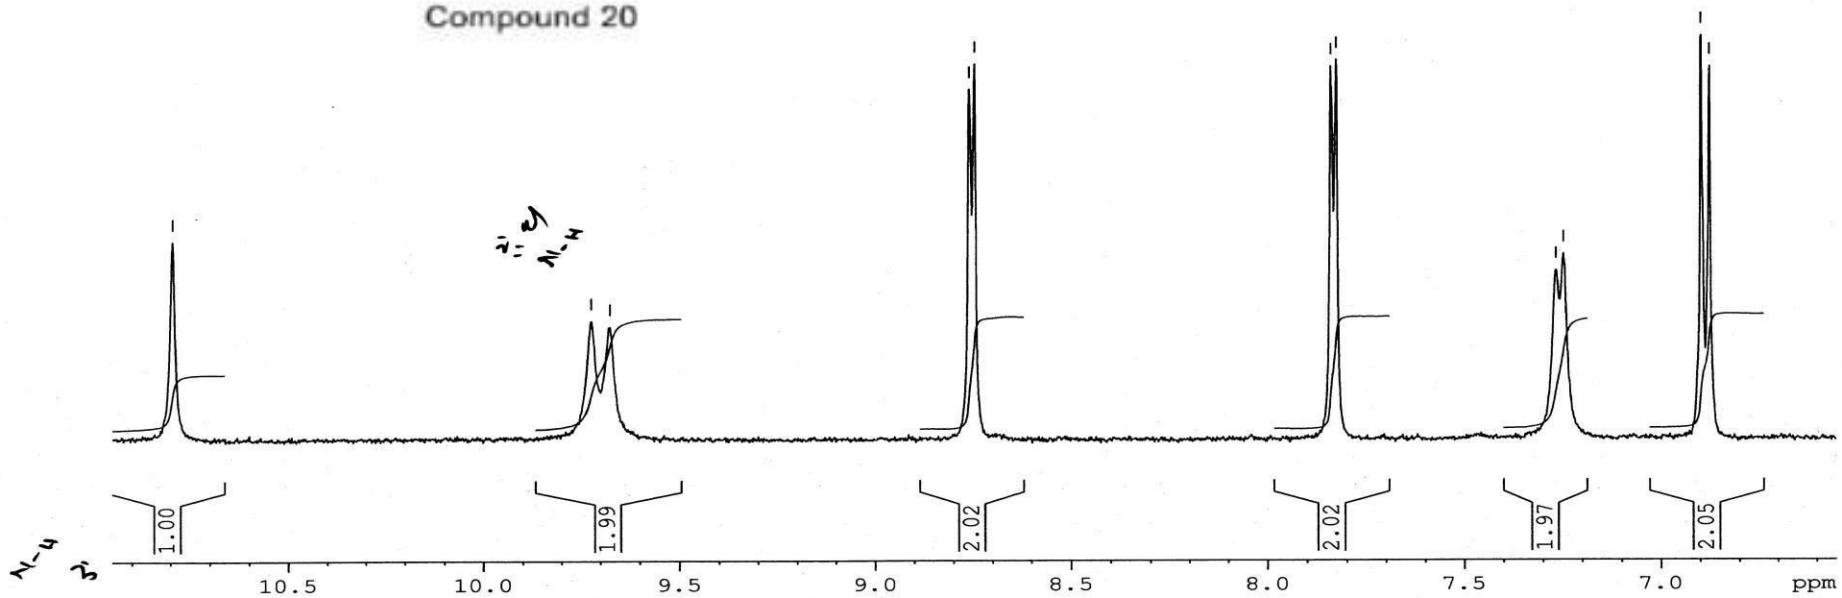

File: FZ-I-ISO25-FABP  
Sample: BUSHRA QAMAR /DR. HINA  
Instrument: JEOL-600H-2  
Inlet: Direct Probe

Date Run: 10-18-2016 (Time Run: 15:16:35)

Ionization mode: FAB+

Scan: 5  
Base: m/z 185; 44.3%FS TIC: 1154738

#Ions: 71

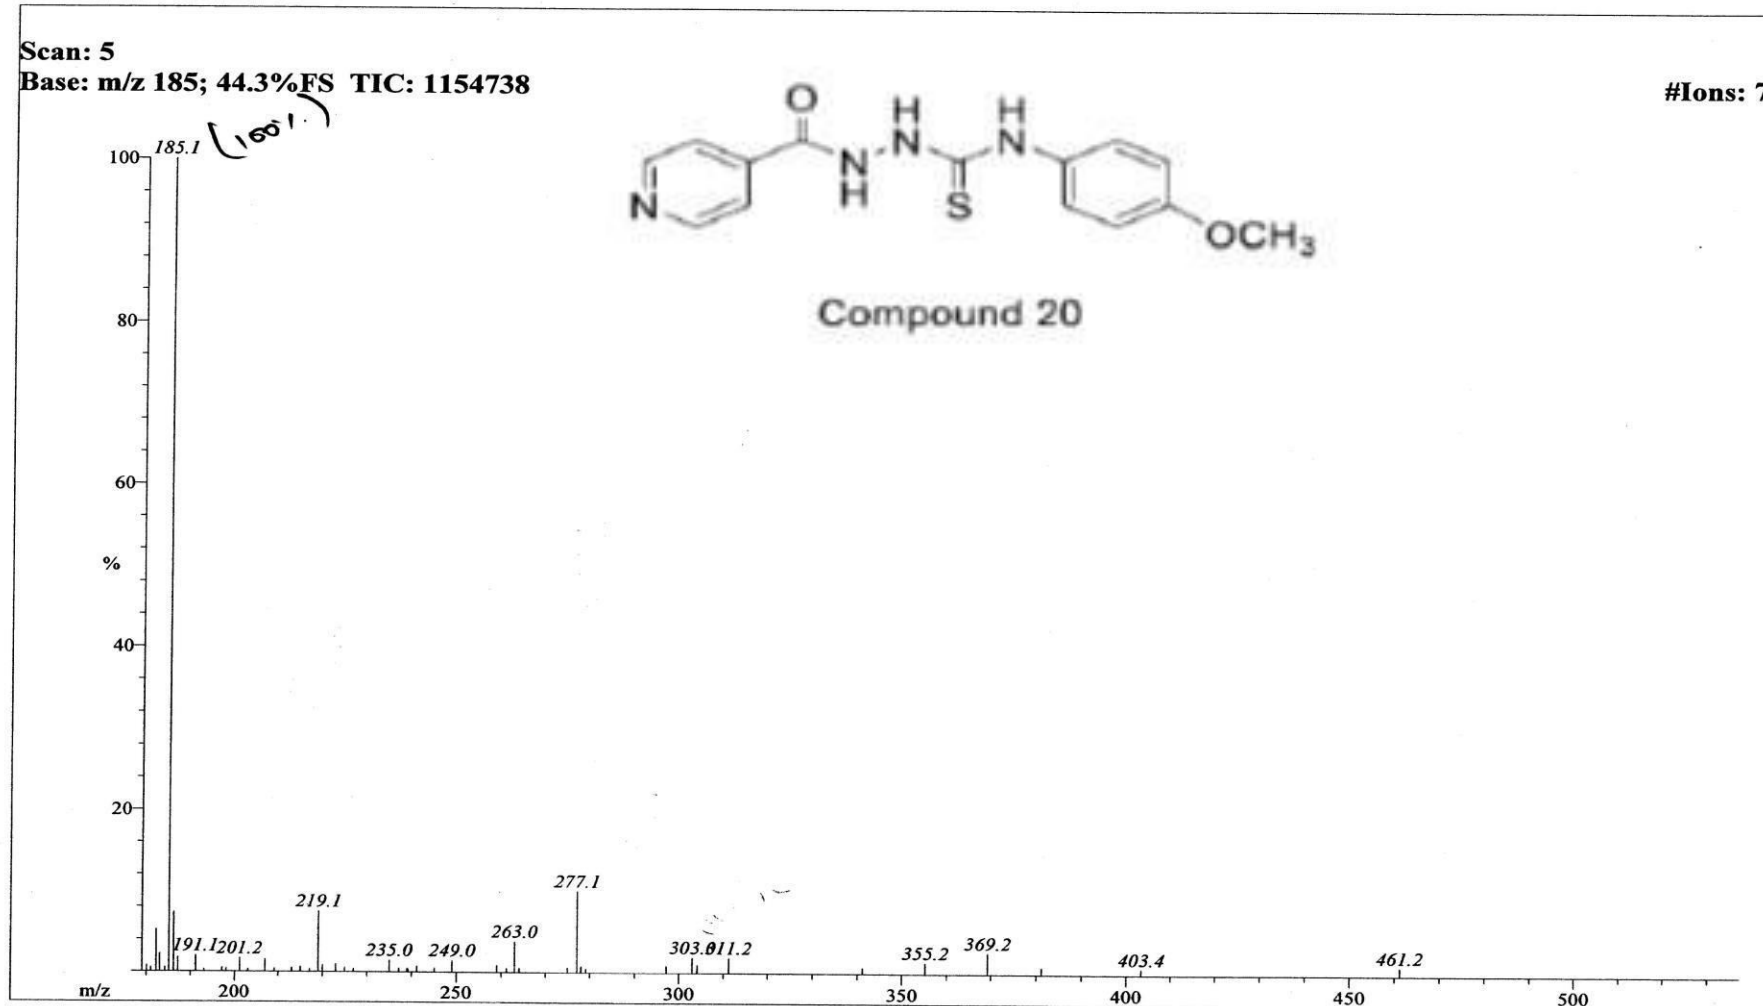

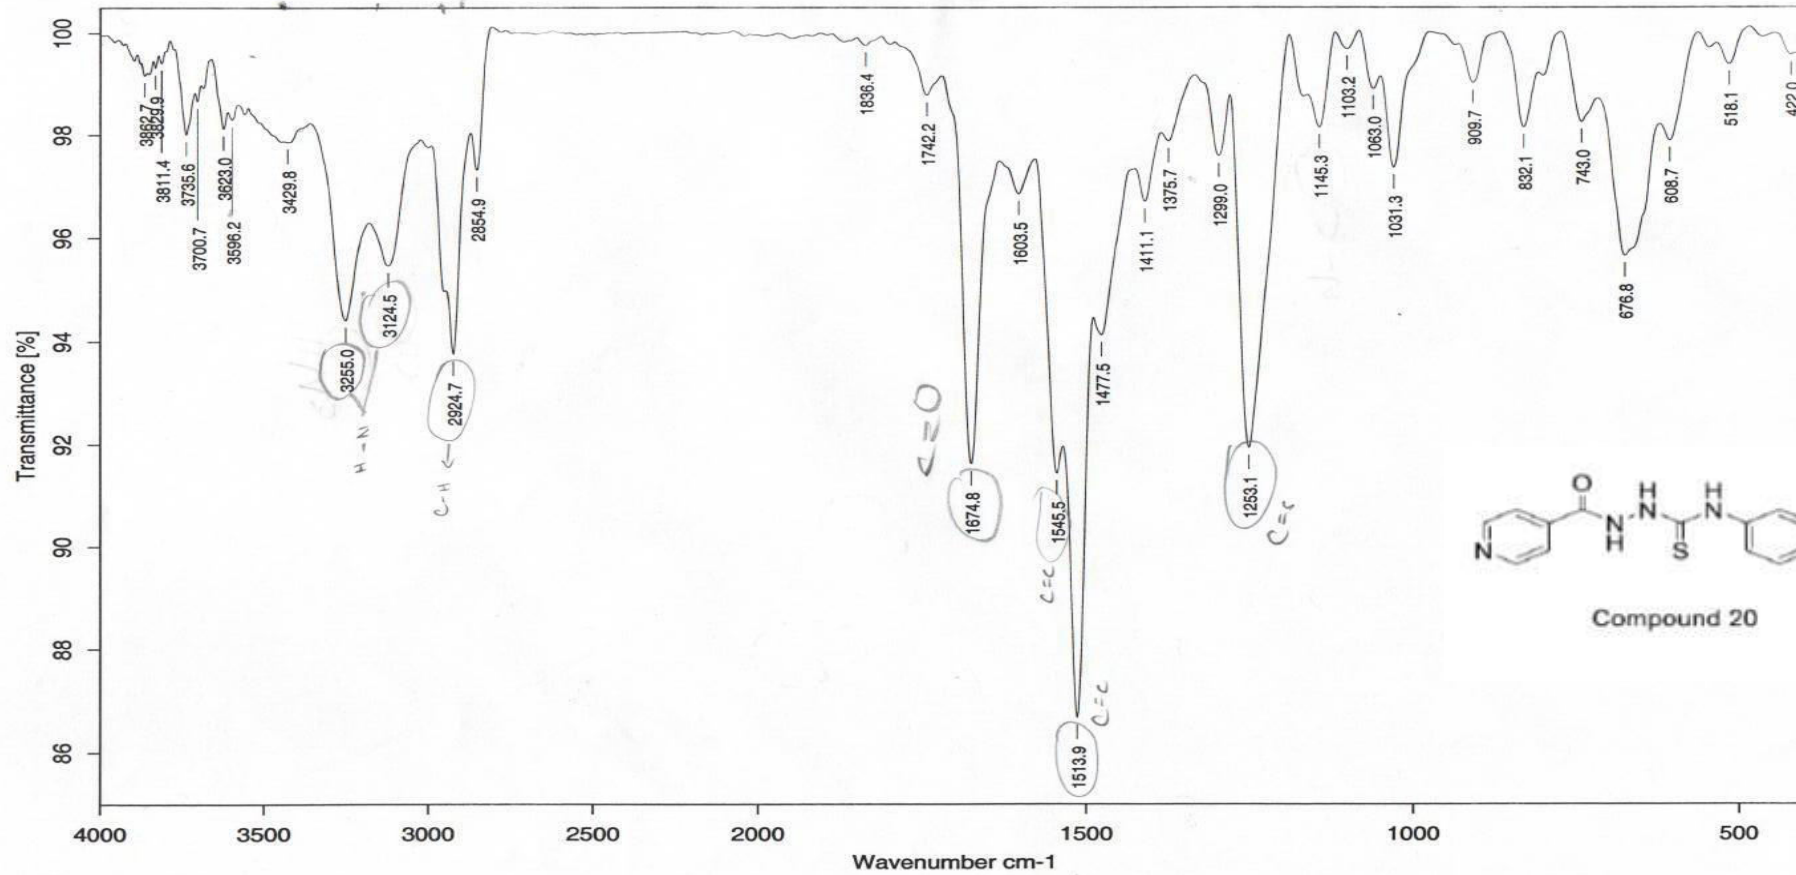

|                                              |                                             |
|----------------------------------------------|---------------------------------------------|
| Sample : Fz-I-Iso25/Fazila Rizvi/Dr. Hina    | Spectrum : Fz-I-Iso25.0 ( in D:\IRSTUDENT ) |
| Measured : 29/12/2016 on VECTOR22            | Technic : Solid                             |
| Resolution : 4 $\text{cm}^{-1}$ ( 10 scans ) | Analyst : M. Asif                           |

FAZILA/DR, HINA/FZ-I-ISO2/  
ICCBS.U.O.K/

—10.958

—10.157

—9.807

8.777

8.757

7.932

7.847

7.833

7.608

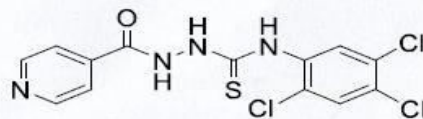

Compound 21

3.319

2.496

2.490

2.485

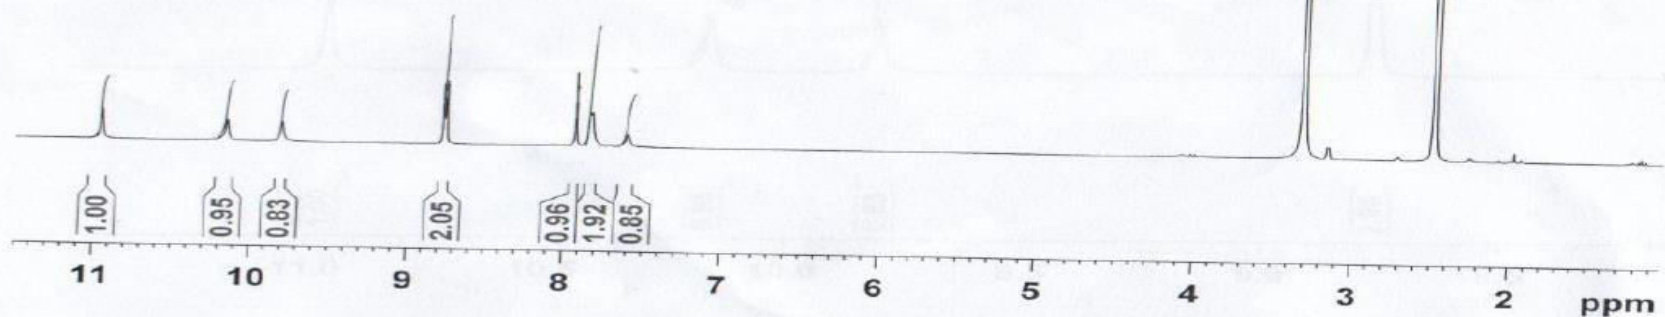

AVANCE AV - III  
300 MHz, LAB # 116

|         |                |
|---------|----------------|
| NAME    | jan03-19       |
| EXPNO   | 9              |
| PROCNO  | 1              |
| Date_   | 20190103       |
| Time_   | 12.13          |
| INSTRUM | Spect          |
| PROBHD  | 5 mm BBO BB-1H |
| PULPROG | zg30           |
| TD      | 32768          |
| SOLVENT | DMSO           |
| NS      | 128            |
| DS      | 0              |
| SWH     | 6188.119 Hz    |
| FIDRES  | 0.188846 Hz    |
| AQ      | 2.6477044 sec  |
| RG      | 406            |
| DW      | 80.800 usec    |
| DE      | 6.50 usec      |
| TE      | 300.0 K        |
| D1      | 1.50000000 sec |
| TDO     | 1              |

|       |             |       |
|-------|-------------|-------|
| ===== | CHANNEL f1  | ===== |
| NUC1  | 1H          |       |
| P1    | 12.50       | usec  |
| PL1   | 0.00        | dB    |
| PL1W  | 13.16228485 | W     |
| SFO1  | 300.1321009 | MHz   |
| SI    | 16384       |       |
| SF    | 300.1300039 | MHz   |
| WDW   | EM          |       |
| SSB   | 0           |       |
| LB    | 0.30        | Hz    |
| GB    | 0           |       |
| PC    | 1.00        |       |

FAZILA/DR, HINA/FZ-I-ISO2/  
ICCBS.U.O.K/

—10.958

—10.157

—9.807

<8.777  
<8.757

<7.932  
<7.847  
<7.833

—7.608

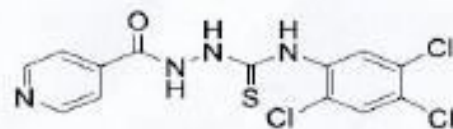

Compound 21

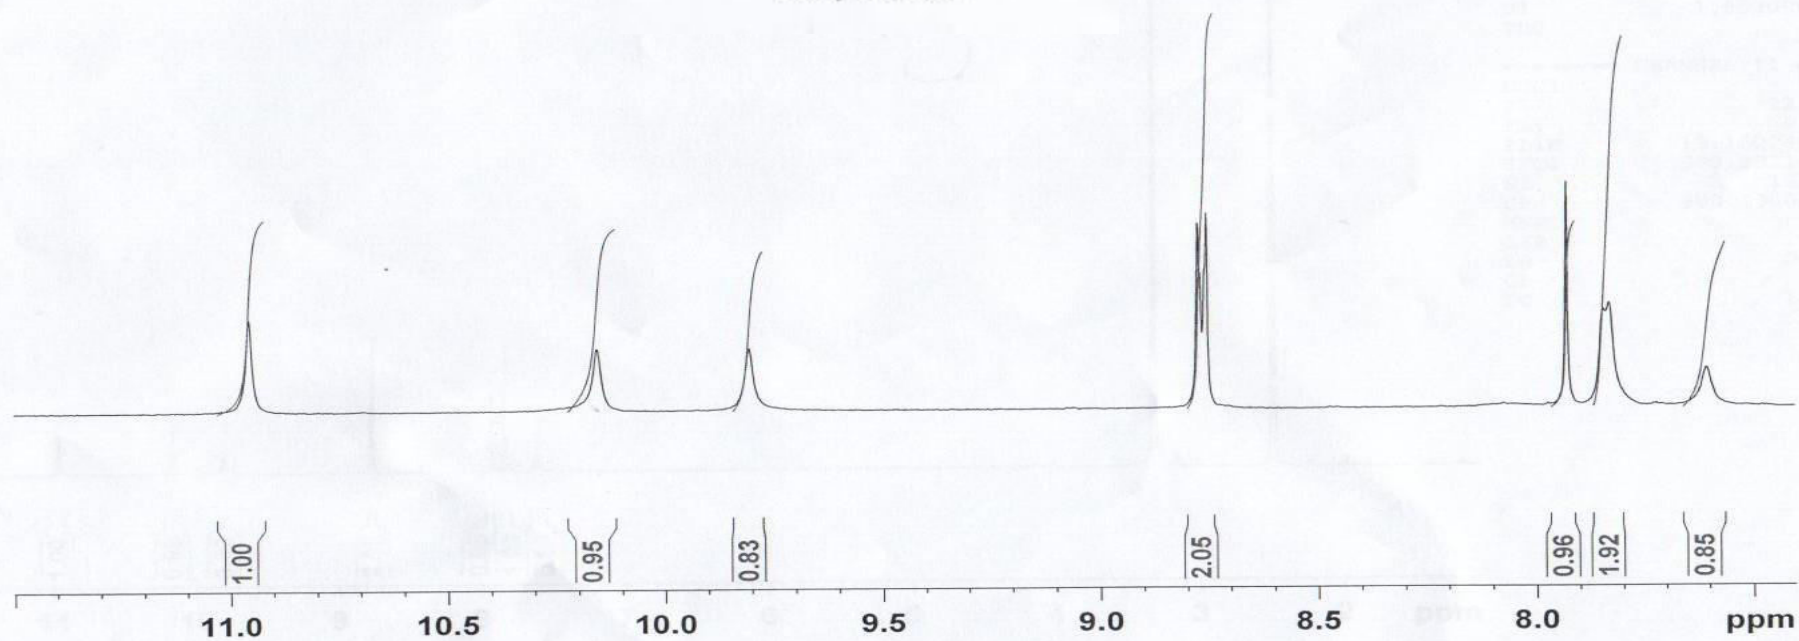

File: FZ-I-ISO2(F)-FABN  
Sample: FAZILA /DR. HINA  
Instrument: JEOL-600H-2  
Inlet: Direct Probe

Date Run: 04-09-2016 (Time Run: 13:50:04)

Ionization mode: FAB-

Scan: 9  
Base: m/z 183; 100%FS TIC: 5396524

R.T.: .72

#Ions: 834

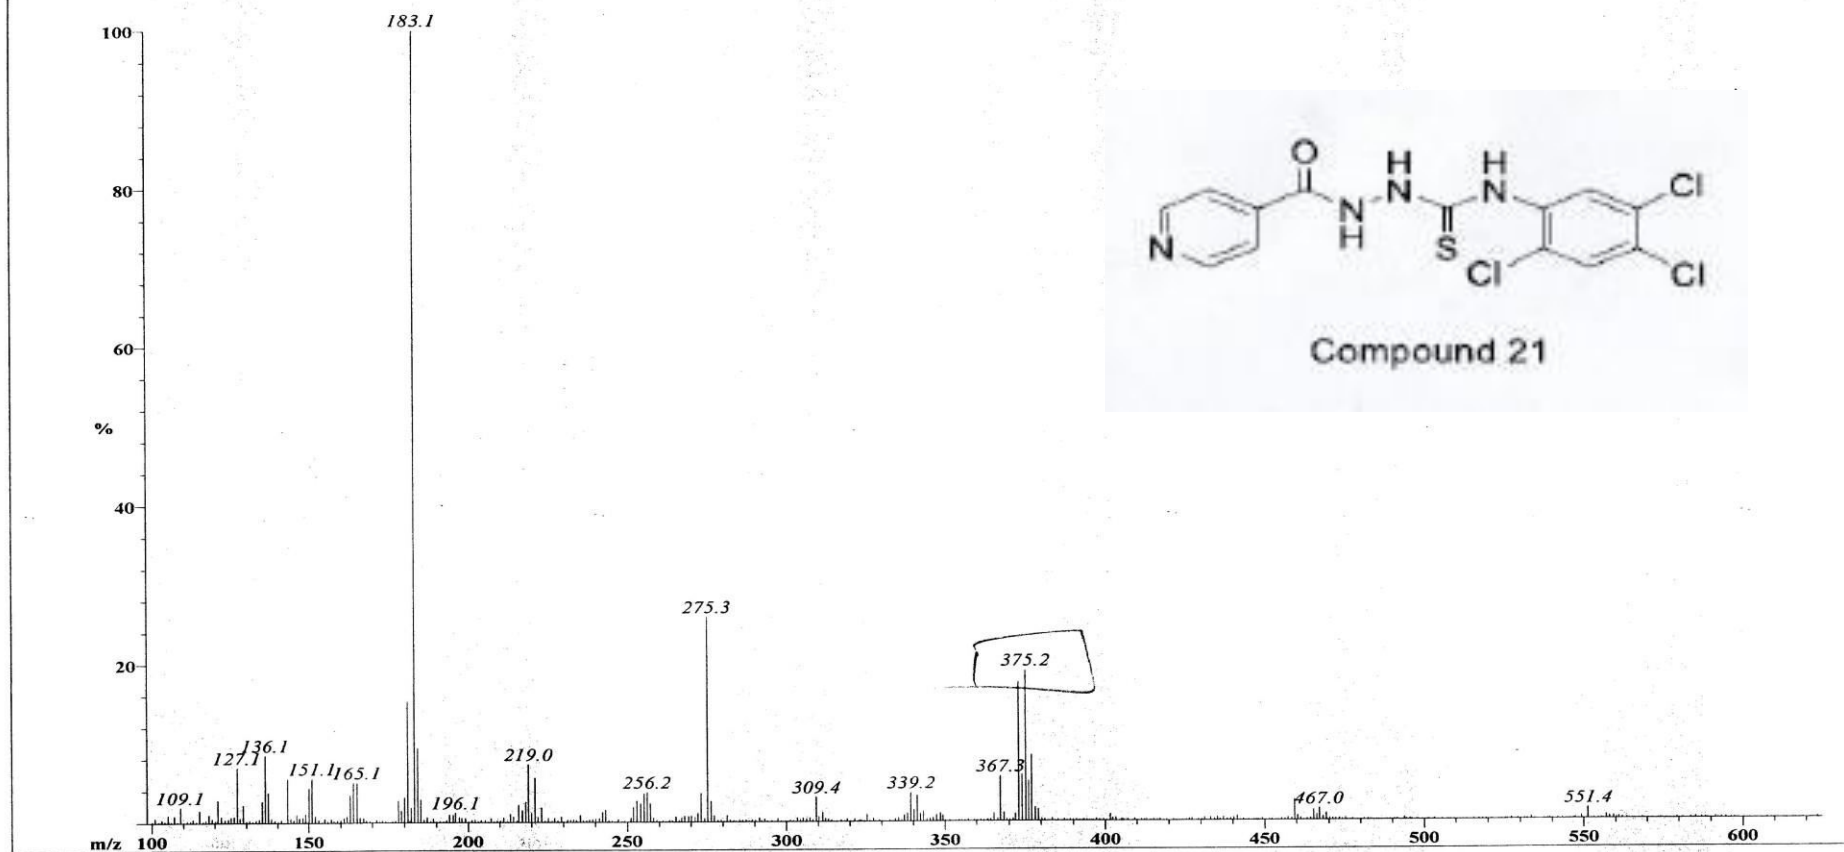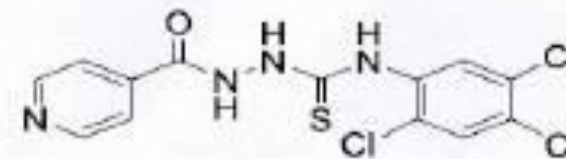

Compound 21



Fazila / D. Hina / FZ-I-ISO2  
BB

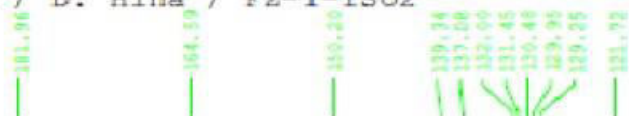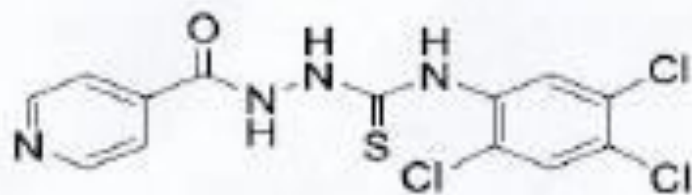

Compound 21

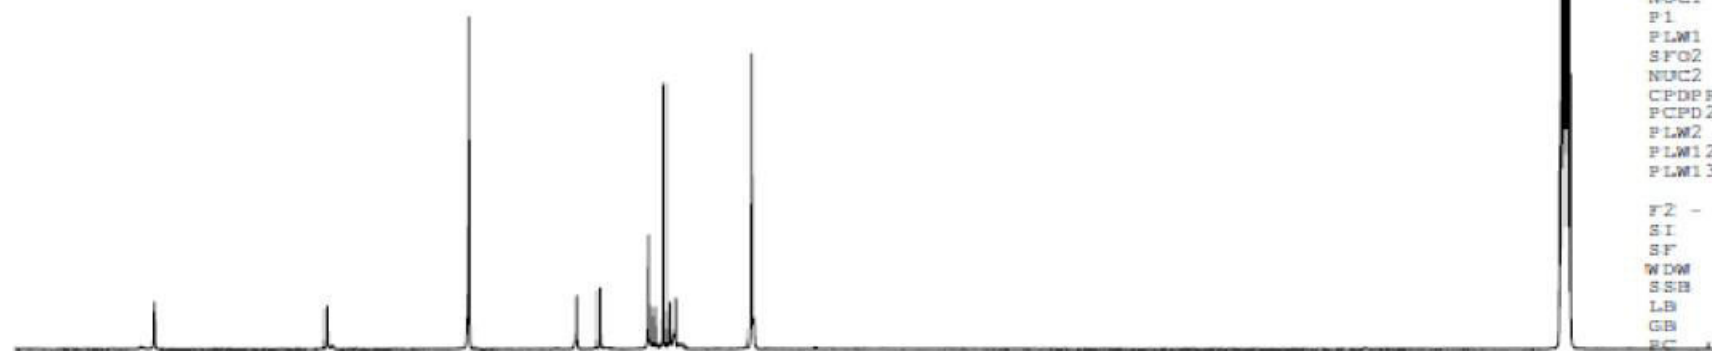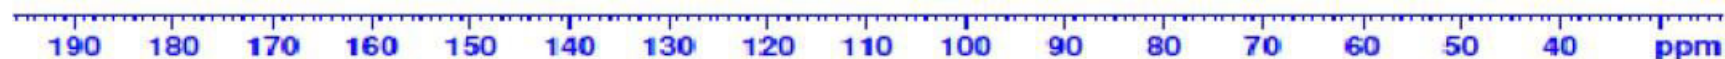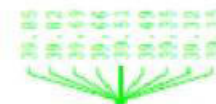

```
Cu
NAME          fz-I-Iso2
EXPNO         1
PROCNO       1

F2 - Acquisition Parameters
Date_         20190204
Time          3.45 h
INSTRUM       Avance Neo 500
PROBHD        z44862_0021 (C)
PULPROG       zgpg
TD            32768
SOLVENT       DMSO
NS            16384
DS            8
SWH           30120.482 Hz
FIDRES        1.838408 Hz
AQ            0.5439488 sec
RG            101
DW            16.600 usec
DE            20.00 usec
TE            298.0 K
D1            2.0000000 sec
D11           0.03000000 sec
TD0           16
SFO1          125.8227986 MHz
NUC1          13C
P1            10.00 usec
PLW1          26.46199989 W
SFO2          500.3320013 MHz
NUC2          1H
CPDPRG[2]     waltz65
PCPD2         80.00 usec
PLW2          9.74149990 W
PLW12         0.34246999 W
PLW13         0.17199001 W

F2 - Processing parameters
SI            16384
SF            125.8081399 MHz
WDW           EM
SSB           0
LB            1.00 Hz
GB            0
PC            1.40
```

Fazila / D. Hina / FZ-I-ISO2  
DEPT135

150.20

132.00  
130.48

121.73

40.10  
39.93  
39.76  
39.59  
39.43

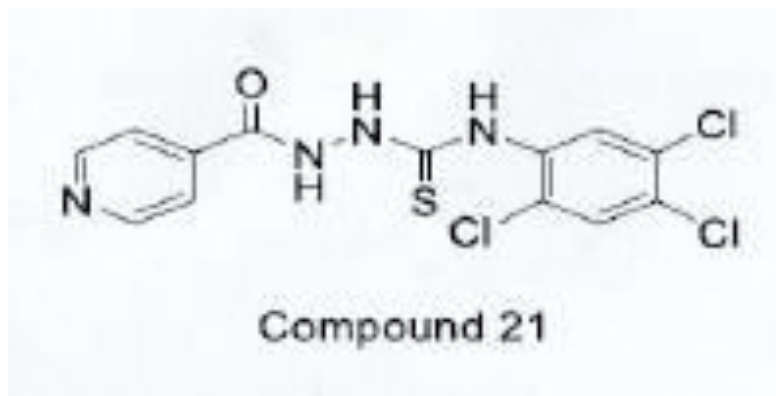

Current Data Parameters  
NAME fz-I-Iso2  
EXPNO 2  
PROCNO 1

F2 - Acquisition Parameters  
Date\_ 20190204  
Time\_ 8.47 h  
INSTRUM Avance Neo 500  
PROBHD Z44862\_0021 (C  
PULPROG deptsp135  
TD 32768  
SOLVENT DMSO  
NS 8233  
DS 8  
SWH 25000.000 Hz  
FIDRES 1.525879 Hz  
AQ 0.6553600 sec  
RG 101  
DW 20.000 usec  
DE 20.00 usec  
TE 298.0 K  
CNST2 145.000000  
D1 1.5000000 sec  
D2 0.00344828 sec  
D12 0.00002000 sec  
TD0 10  
SFO1 125.8200303 MHz  
NUC1 13C  
P1 10.00 usec  
P13 2000.00 usec  
PLW0 0 W  
PLW1 26.46199989 W  
SPNAM[5] Crp60comp.4  
SPOALS 0.500  
SPOFFS5 0 Hz  
SPW5 4.04309988 W  
SFO2 500.3320013 MHz  
NUC2 1H  
CPDPRG[2] waltz65  
P3 15.00 usec  
P4 30.00 usec  
PCPD2 80.00 usec  
PLW2 9.74149990 W  
PLW12 0.34246999 W

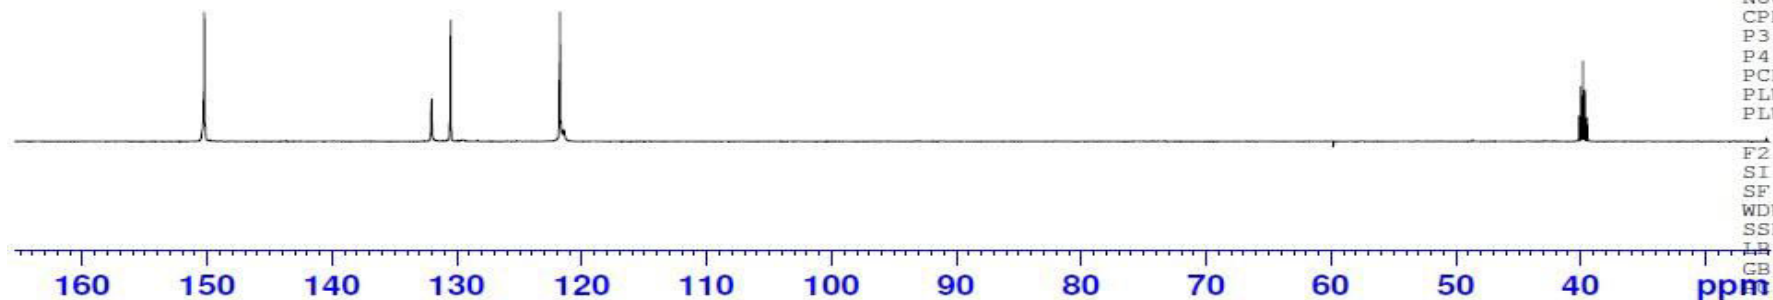

F2 - Processing parameters  
SI 16384  
SF 125.8081395 MHz  
WDW EM  
SSB 0  
LR 1.00 Hz  
GB 0  
1.40

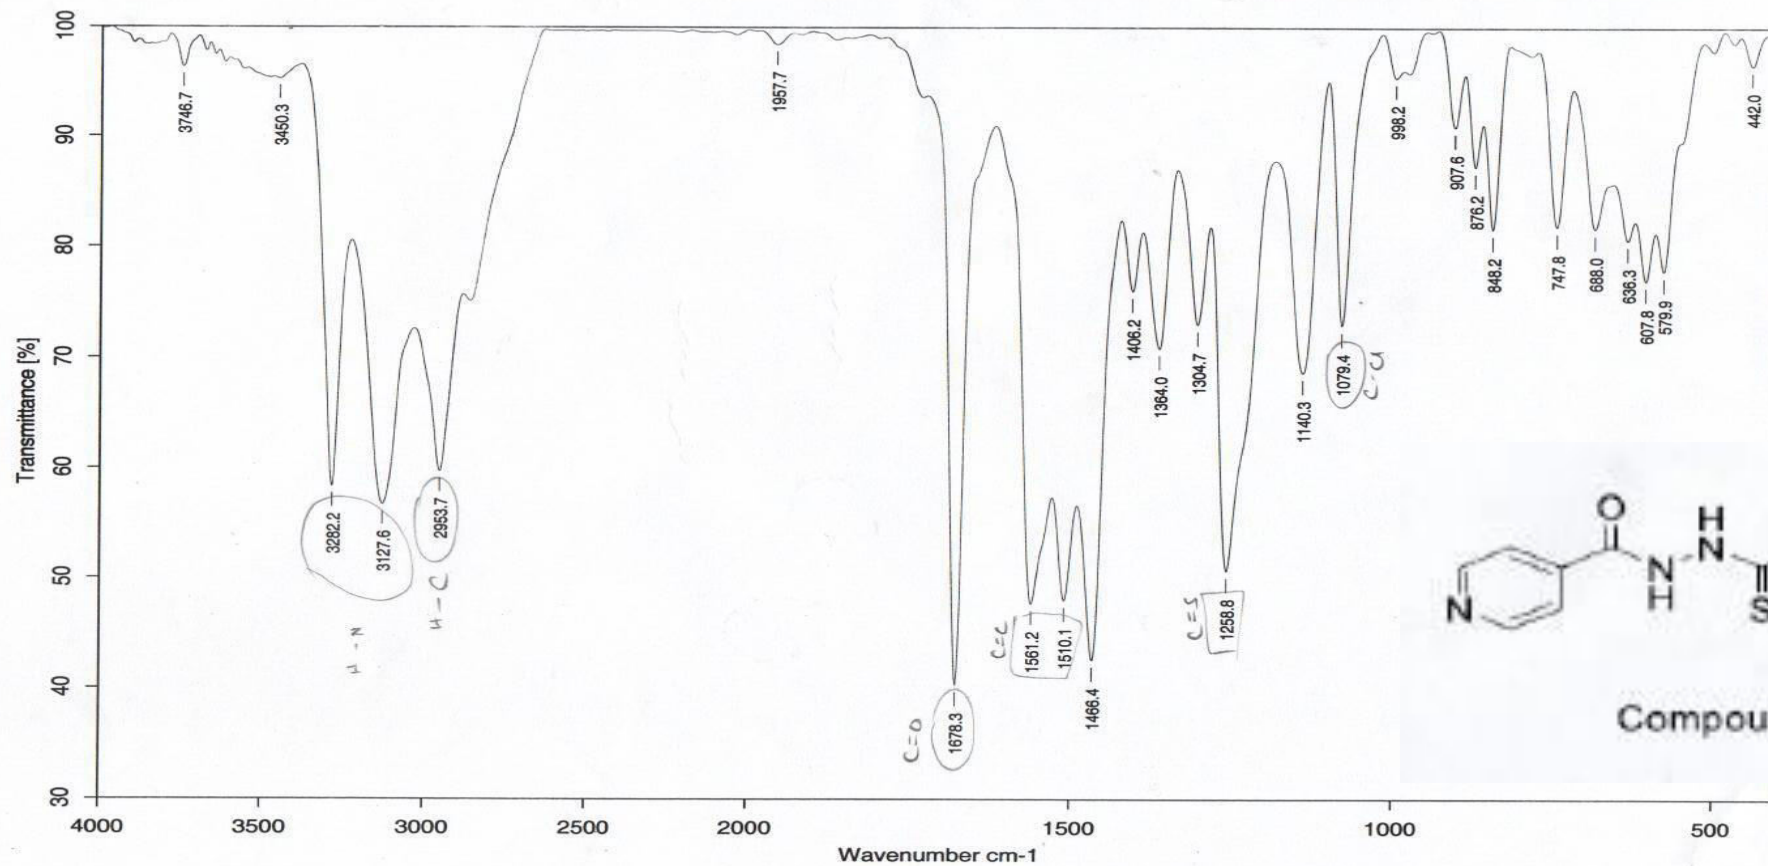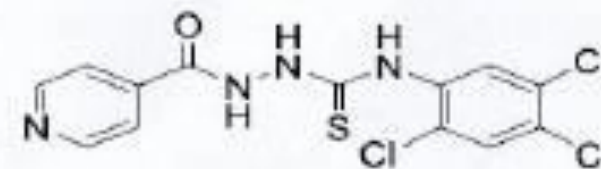

Compound 21

Sample : FZI-ISO2/Fazila Rizvi

Measured : 19/04/2017 on VECTOR22

Resolution : 4  $\text{cm}^{-1}$  ( 10 scans )

Spectrum : FZ-I-ISO2.0 ( in D:\IRSTUDENT )

Technic : Solid

Analyst : MA/ZA/JS

AVANCE AV-400 MHz  
Lab # 115

BUSHRA/DR.HINA/FZ.I.ISO.27  
1H

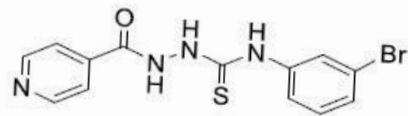

Compound 22

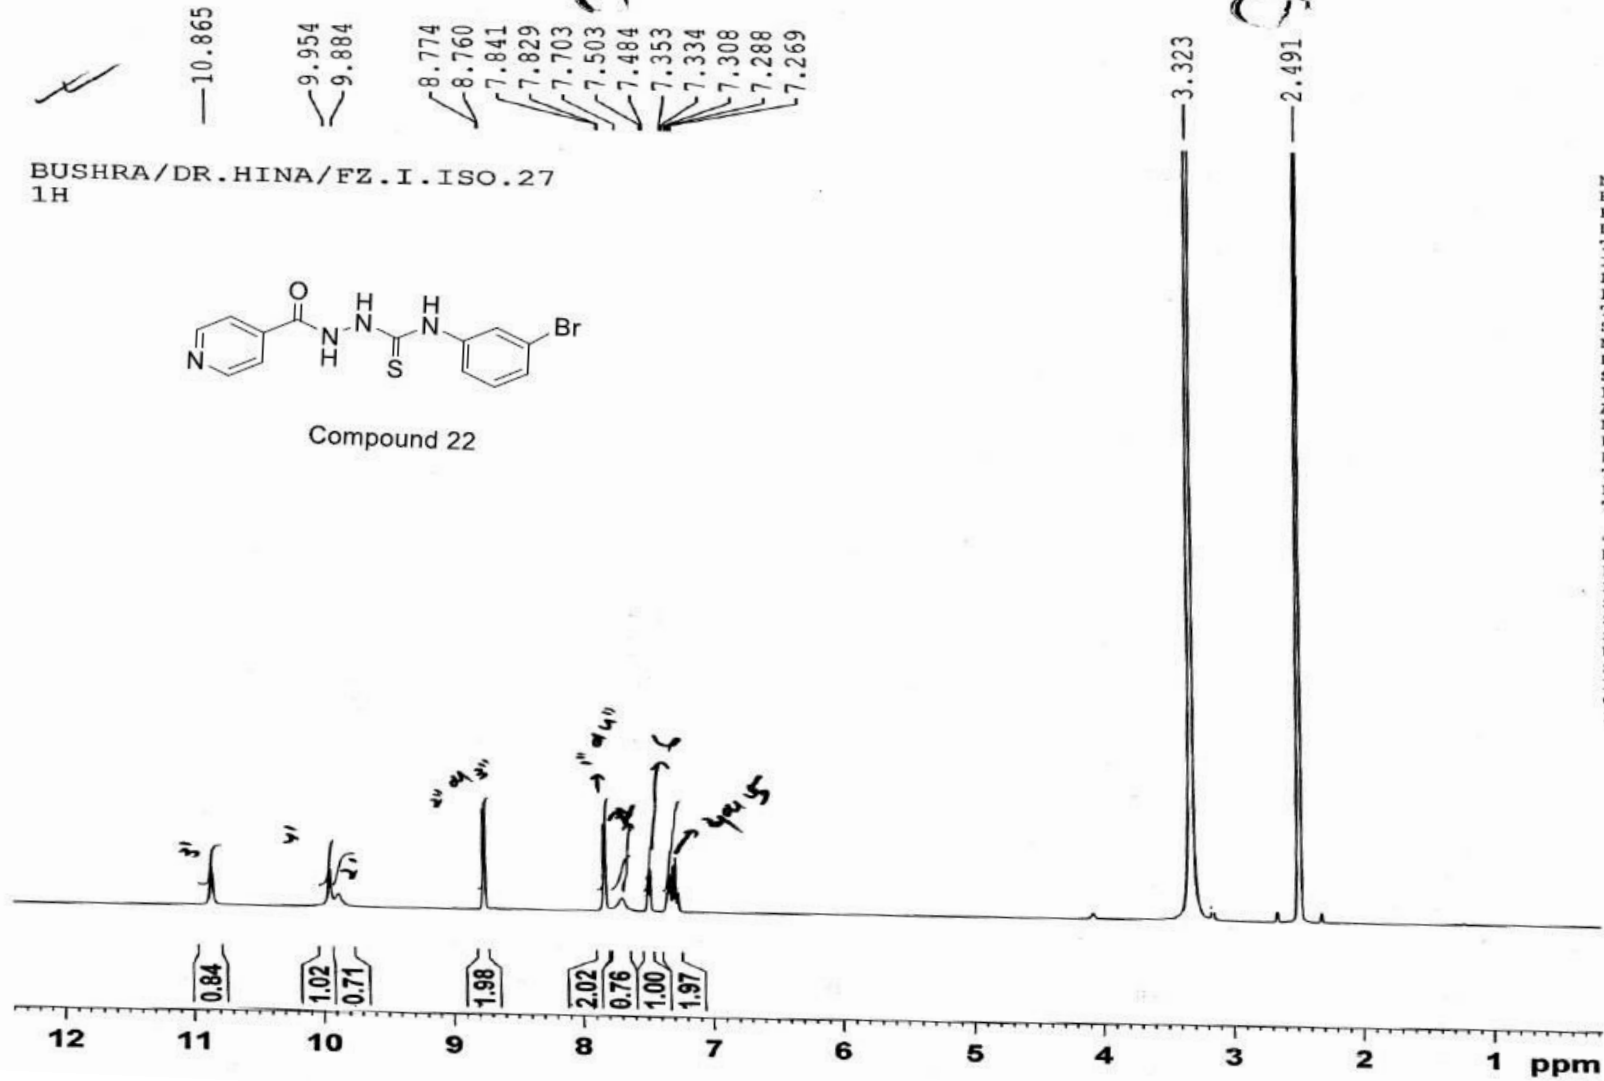

```

NAME      oct017-16
EXPNO     4
PROCNO    1
Date_     20161017
Time      12.32
INSTRUM   spect
PROBHD    5 mm SEI 1H-13
PULPROG   zg30
TD         65536
SOLVENT   DMSO
NS         128
DS         0
SWH       8012.820 Hz
FIDRES    0.122266 Hz
AQ        4.0894966 sec
RG         322.5
DW        62.400 usec
DE         6.50 usec
TE        300.0 K
D1        1.50000000 sec
TDO       1

----- CHANNEL f1 -----
NUC1      1H
P1        10.80 usec
PL1       3.00 dB
SFO1     400.0332002 MHz
SI        32768
SF        400.0300041 MHz
WDW       EM
SSB       0
LB        0.30 Hz
GB        0
PC        0.20

```

8.774  
8.760

7.841  
7.829

7.703

7.503  
7.484

7.353  
7.334  
7.308  
7.288  
7.269

BUSHRA/DR.HINA/FZ.I.ISO.27  
1H

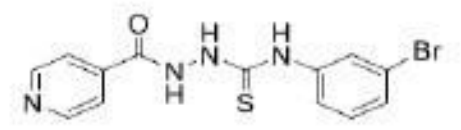

Compound 22

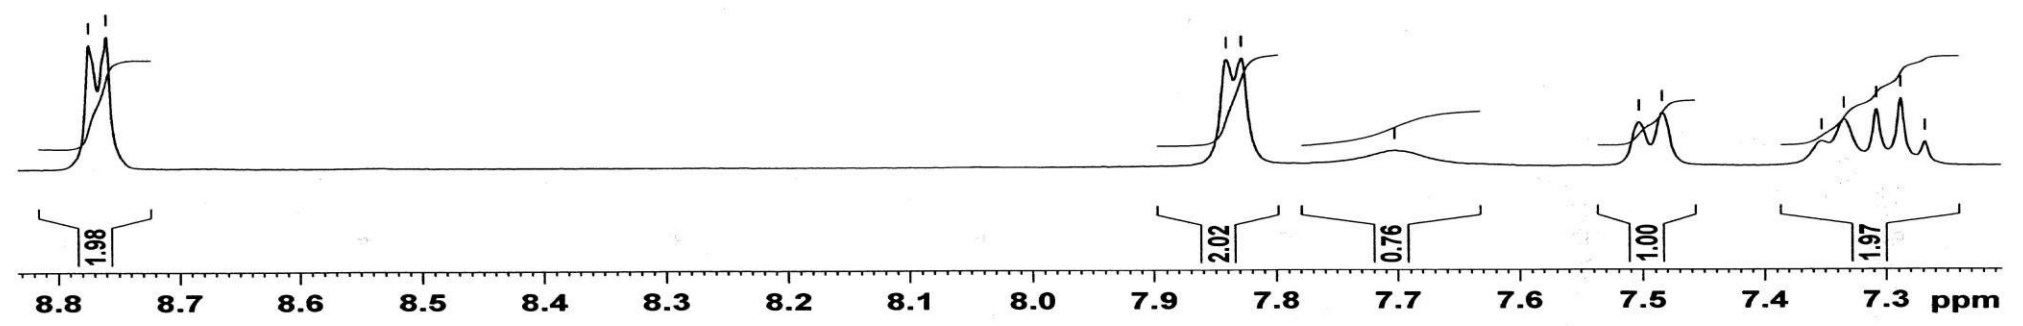

File: FZ-I-ISO27-FABN  
Sample: BUSHRA QAMAR /DR. HINA  
Instrument: JEOL-600H-2  
Inlet: Direct Probe

Date Run: 10-19-2016 (Time Run: 16:13:01)

Ionization mode: FAB-

Scan: 8

R.T.: .62

#Ions: 462

Base: m/z 183; 56.2%FS TIC: 2067620

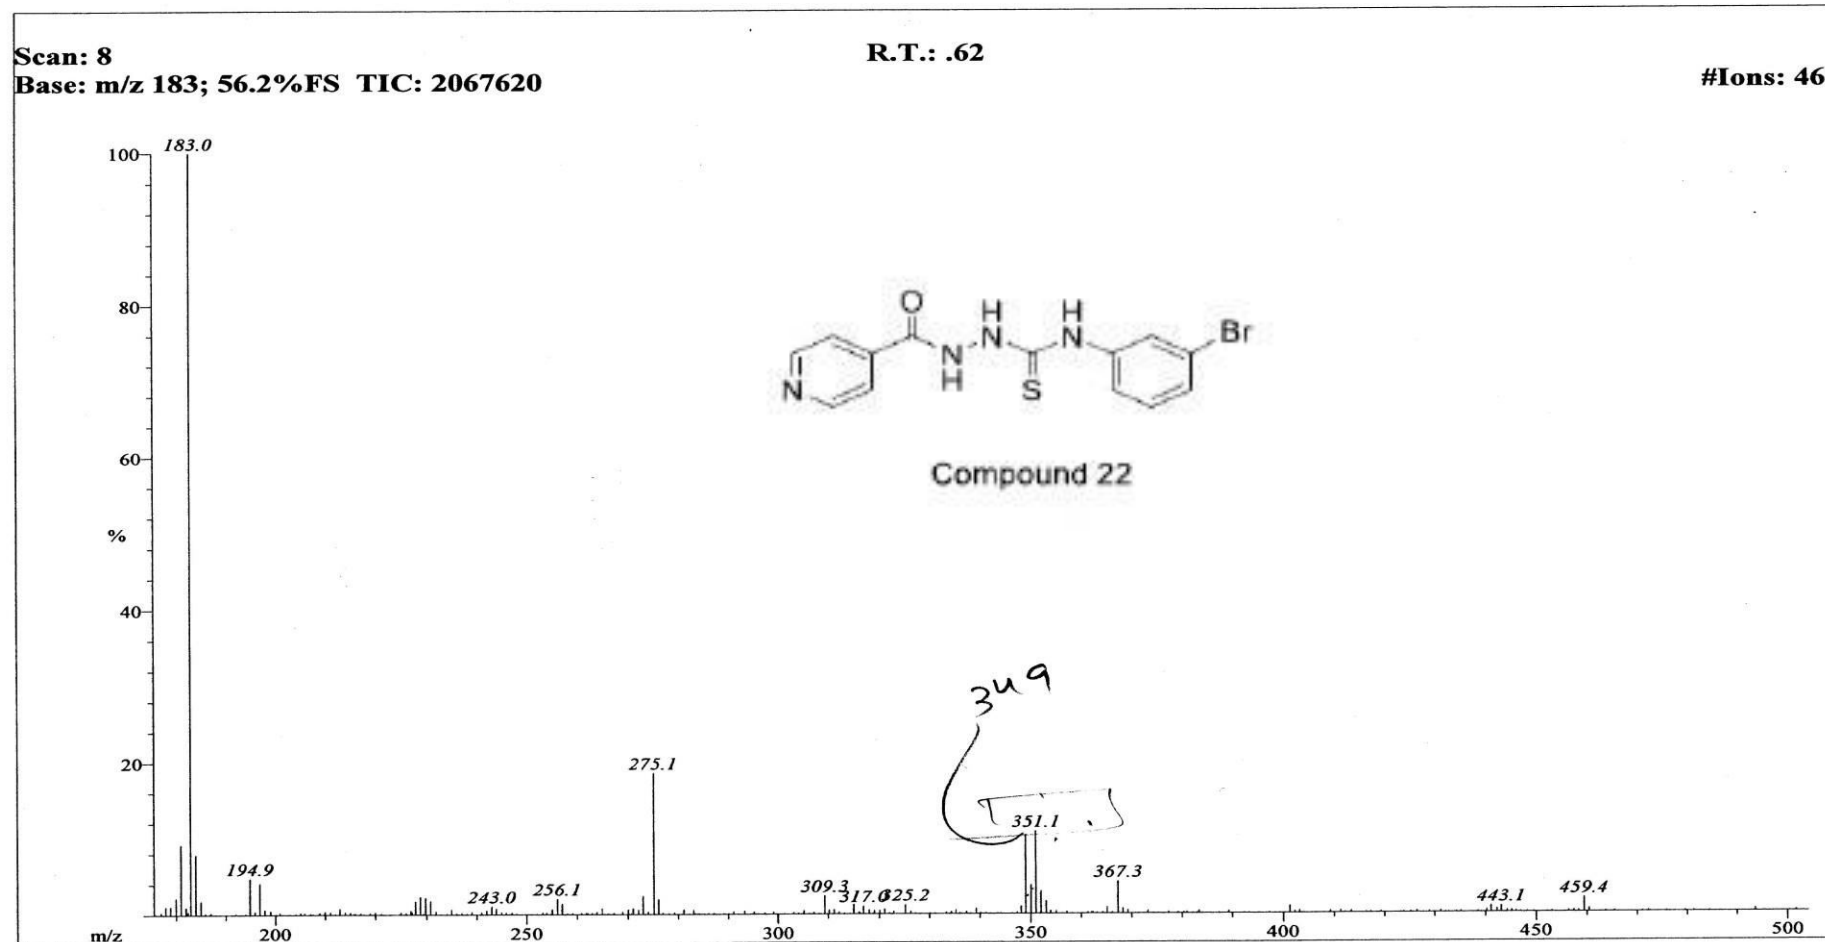

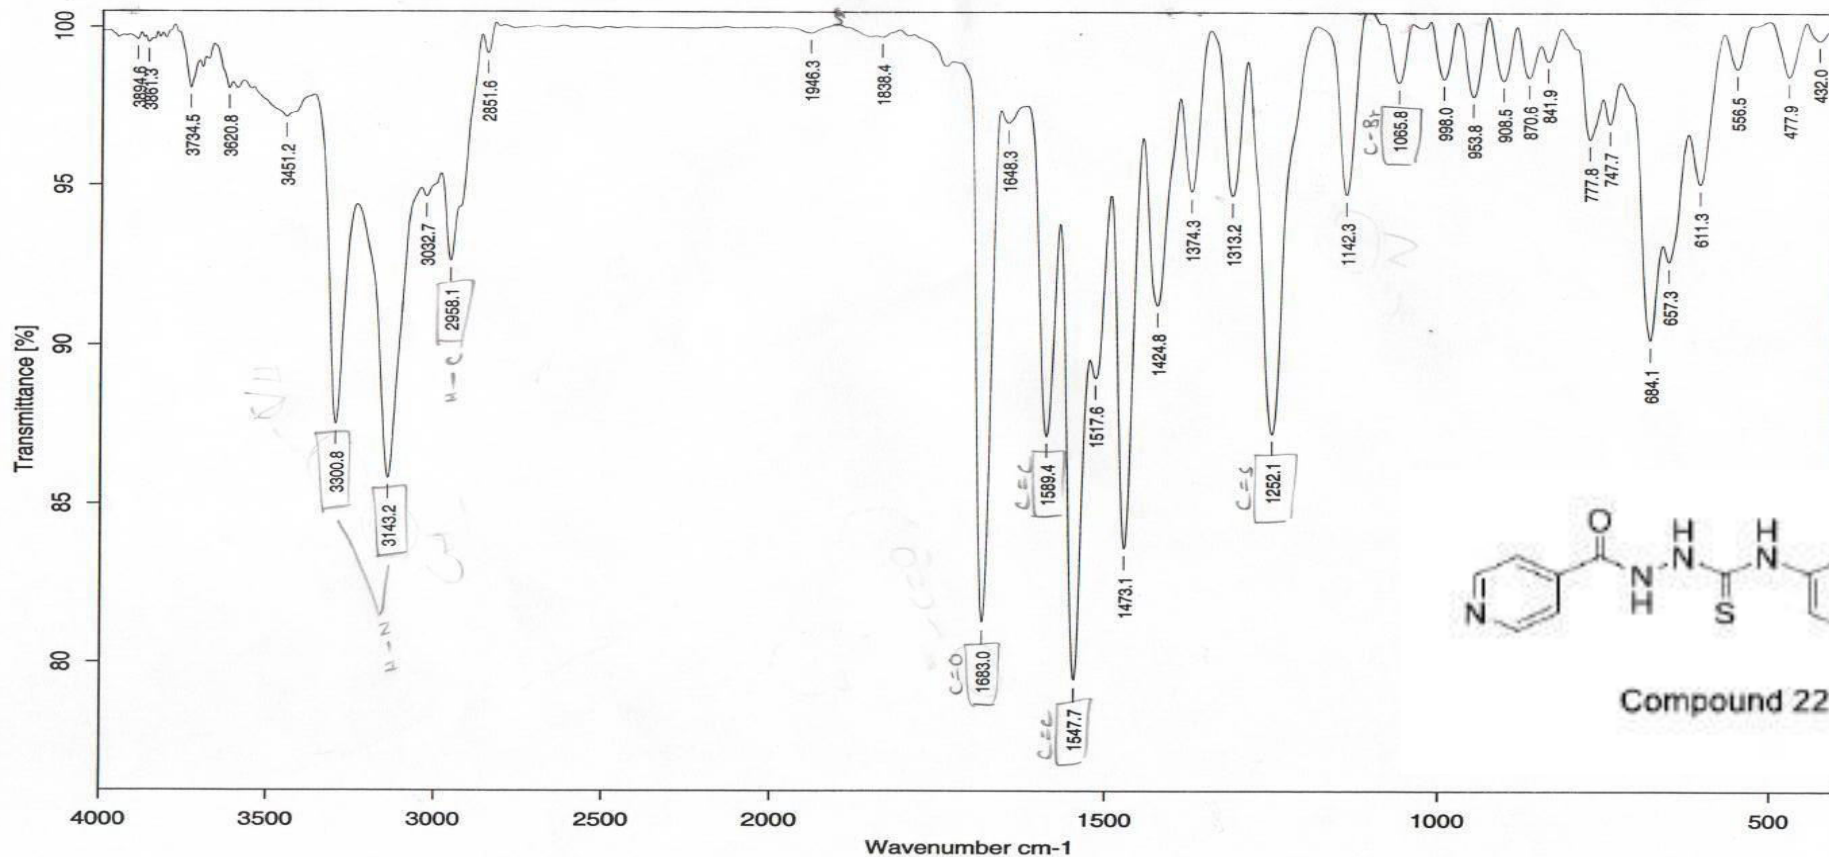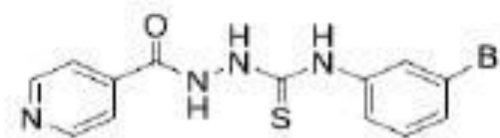

Compound 22

|                                              |                                             |
|----------------------------------------------|---------------------------------------------|
| Sample : Fz-I-Iso27/Fazila Rizvi/Dr. Hina    | Spectrum : Fz-I-Iso27.0 ( in D:\IRSTUDENT ) |
| Measured : 29/12/2016 on VECTOR22            | Technic : Solid                             |
| Resolution : 4 cm <sup>-1</sup> ( 10 scans ) | Analyst : M. Asif                           |

fazila\_rizvi/Dr.Hina/Fz-1-isc28  
1H

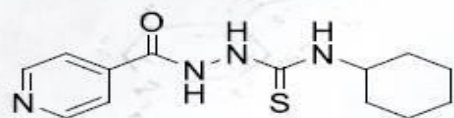

Compound 23

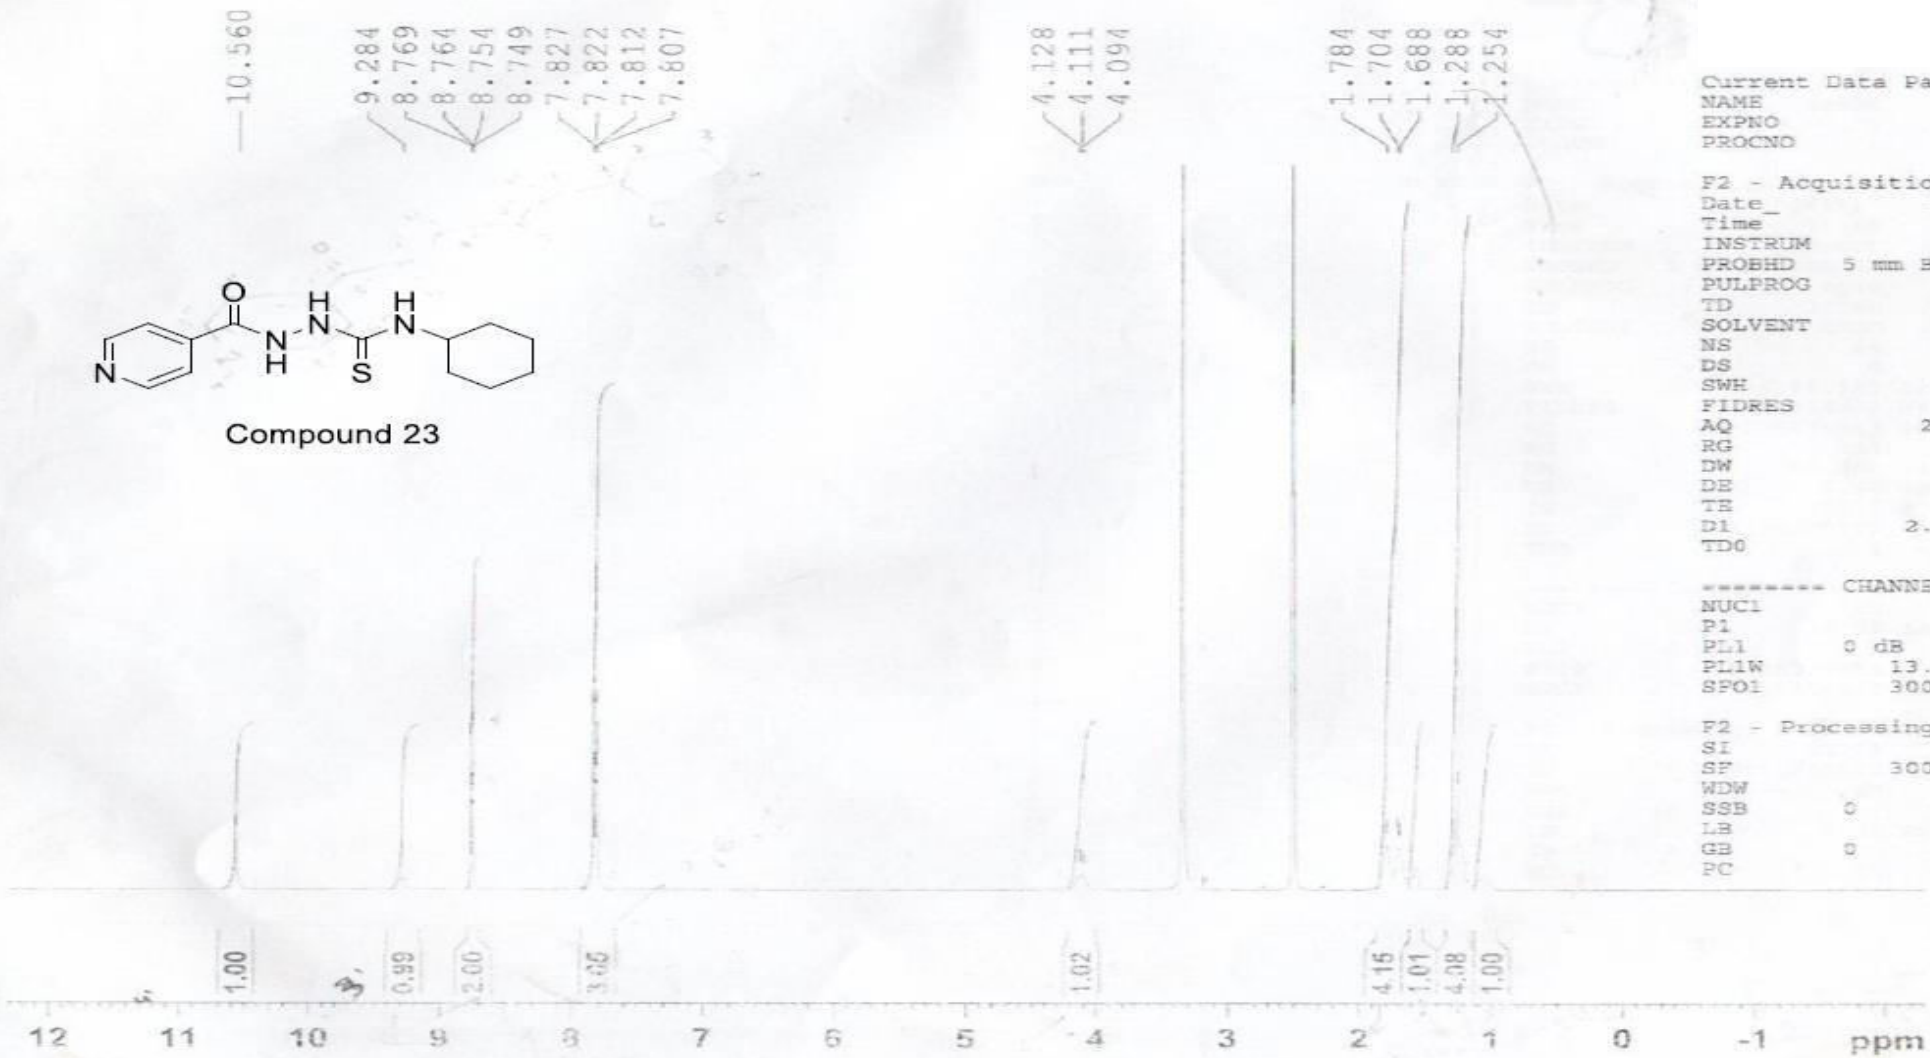

Current Data Parameters  
NAME iso28  
EXPNO 5  
PROCNO 1

F2 - Acquisition Parameters  
Date\_ 20161117  
Time\_ 11.46  
INSTRUM Spect  
PROBHD 5 mm BBO BB-1H  
PULPROG zg30  
TD 32768  
SOLVENT DMSO  
NS 64  
DS 0  
SWH 6188.119 Hz  
FIDRES 0.188846 Hz  
AQ 2.6476543 sec  
RG 203  
DW 80.800 usec  
DE 6.50 usec  
TE 300.0 K  
D1 2.0000000 sec  
TD0 1

----- CHANNEL f1 -----  
NUC1 1H  
P1 12.50 usec  
PL1 0 dB  
PL1W 13.16228485 W  
SFO1 300.1324010 MHz

F2 - Processing parameters  
SI 32768  
SF 300.1360000 MHz  
WDW EM  
SSB 0  
LB 0.30 Hz  
GB 0  
PC 1.00



azila rizvi/Dr.Hina/Fz-I-iso28  
1H

10.560

9.284

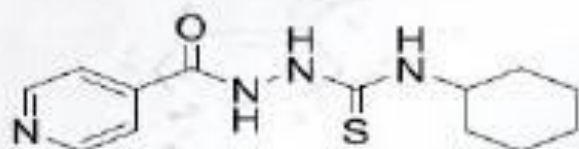

Compound 23

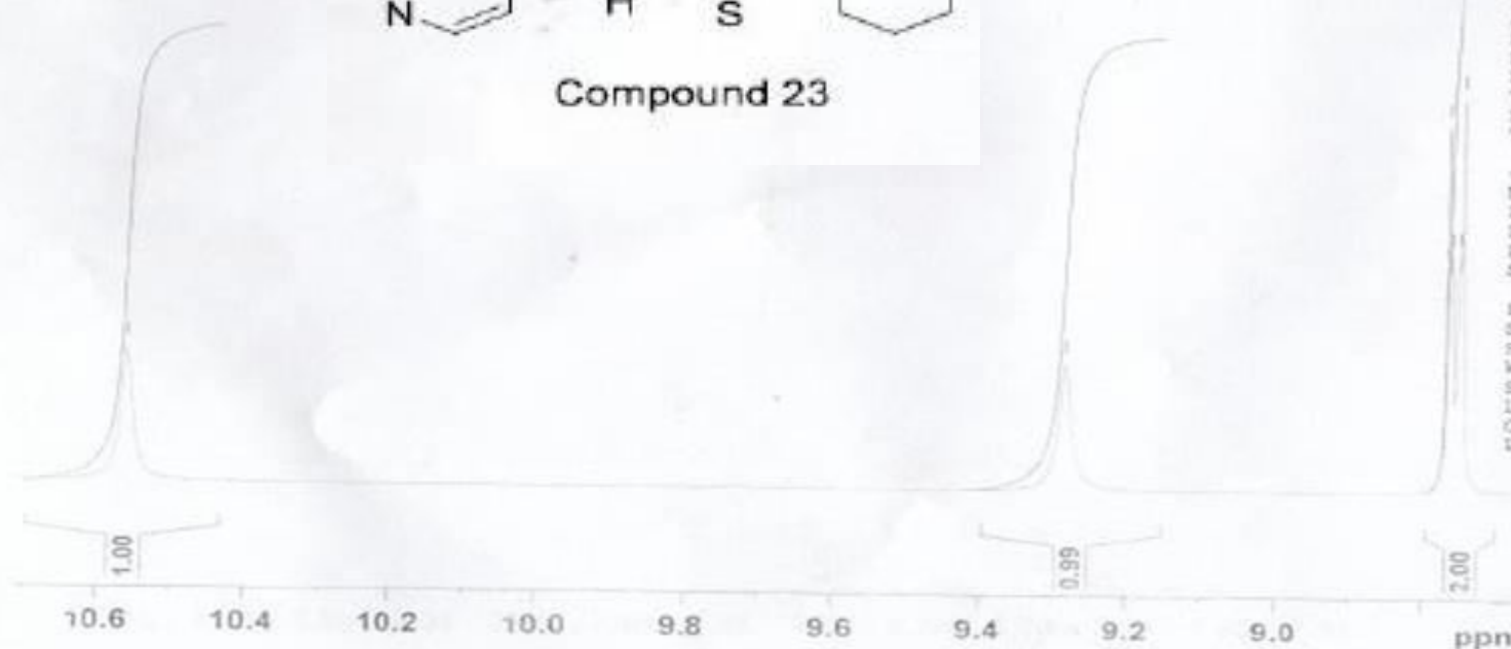

```
Current Data Parameters
NAME          iso28
EXPNO         3
PROCNO        1
-----
F2 - Acquisition Parameters
Date_         20161117
Time          11.48
INSTRUM       Spect
PROBHD        5 mm BBO BB-1H
PULPROG       zg30
TD            32768
SOLVENT       DMSO
NS            64
DS            0
SWH           6188.119 Hz
FIDRES        0.188846 Hz
AQ            2.6476543 sec
RG            203
DM            80.800 usec
DE            6.50 usec
TE            300.0 K
D1            2.00000000 sec
TDO           1
-----
***** CHANNEL f1 *****
NUC1          1H
P1            12.50 usec
PL1           0 dB
PL1W          13.16228485 W
SFO1          300.1324010 MHz
-----
F2 - Processing parameters
SI            32768
SF            300.1300000 MHz
WDW           EM
SSB           0
LB            0.30 Hz
GB            0
DC            1.00
```

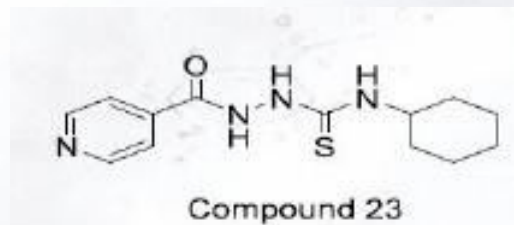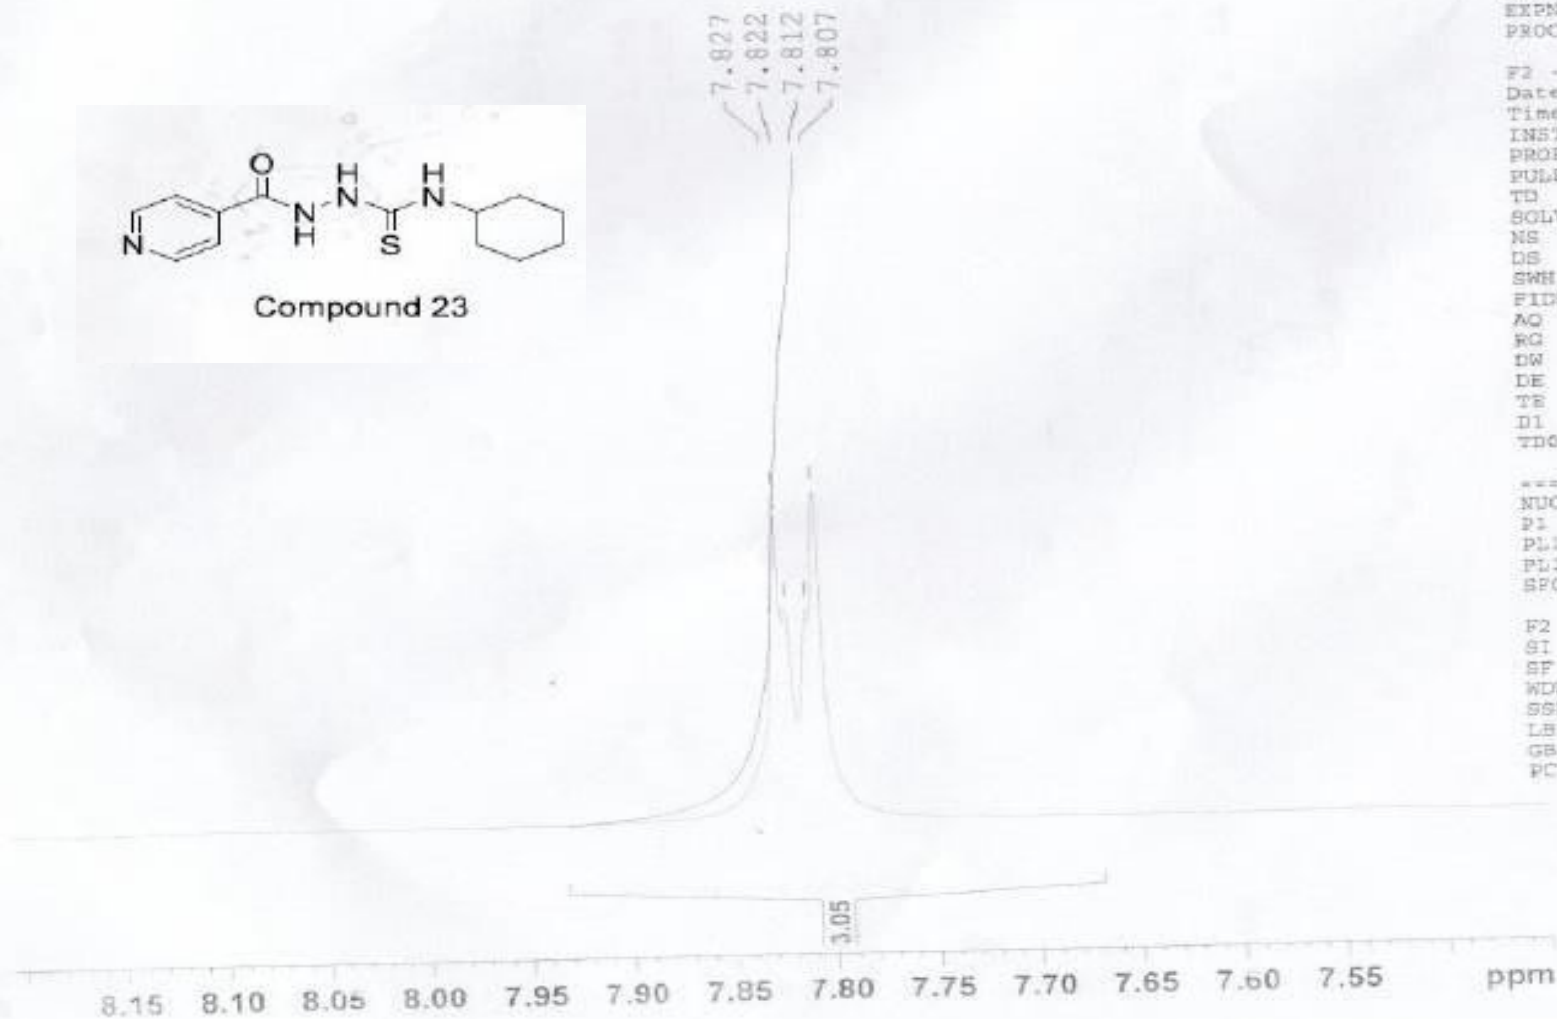

Current Data Parameters  
NAME iso28  
EXPNO 5  
PROCNO 1

F2 - Acquisition Parameters  
Date\_ 20161117  
Time 11.48  
INSTRUM Spect  
PROBHD 5 mm BBO BB-1H  
PULPROG zg30  
TD 32768  
SOLVENT DMSO  
NS 64  
DS 0  
SWH 6188.119 Hz  
FIDRES 0.188846 Hz  
AQ 2.6476543 sec  
RG 203  
DW 80.800 usec  
DE 6.50 usec  
TE 300.0 K  
D1 2.00000000 sec  
TDC 1

----- CHANNEL F1 -----  
NUC1 1H  
P1 12.50 usec  
PL1 0 dB  
PL1W 13.16228485 W  
SFO1 300.1324010 MHz

F2 - Processing parameters  
SI 32768  
SF 300.1324010 MHz  
WDW EM  
SSB 0  
LB 0.30 Hz  
GB 0  
PC 1.00

File: FZ-I-ISO28-FABN  
Sample: BUSHRA QAMAR /DR. HINA  
Instrument: JEOL-600H-2  
Inlet: Direct Probe

Date Run: 10-19-2016 (Time Run: 16:20:39)

Ionization mode: FAB-

Scan: 10

R.T.: .8

Base: m/z 277; 47.4%FS TIC: 2426778

#Ions: 507

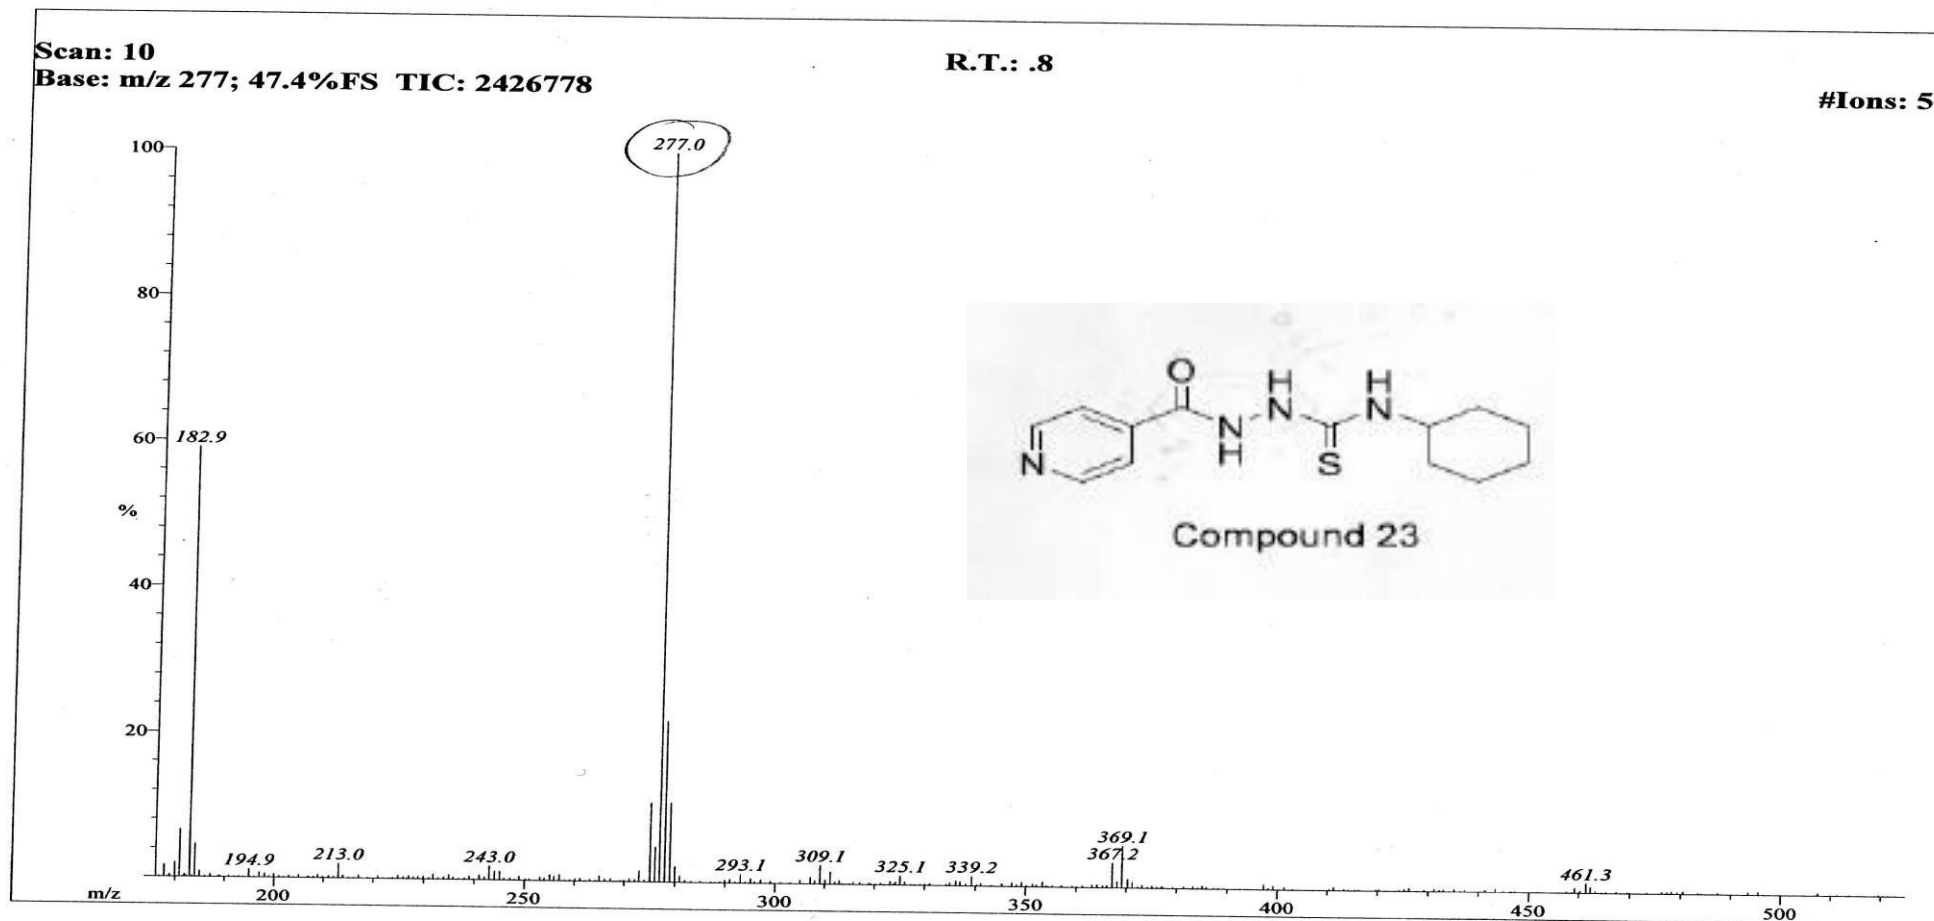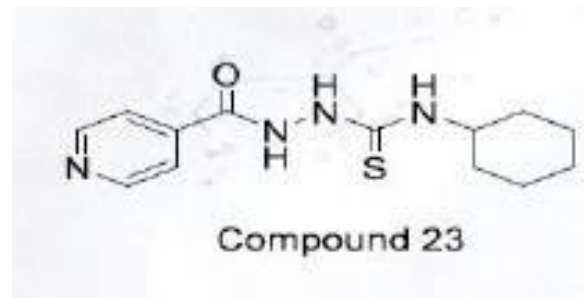

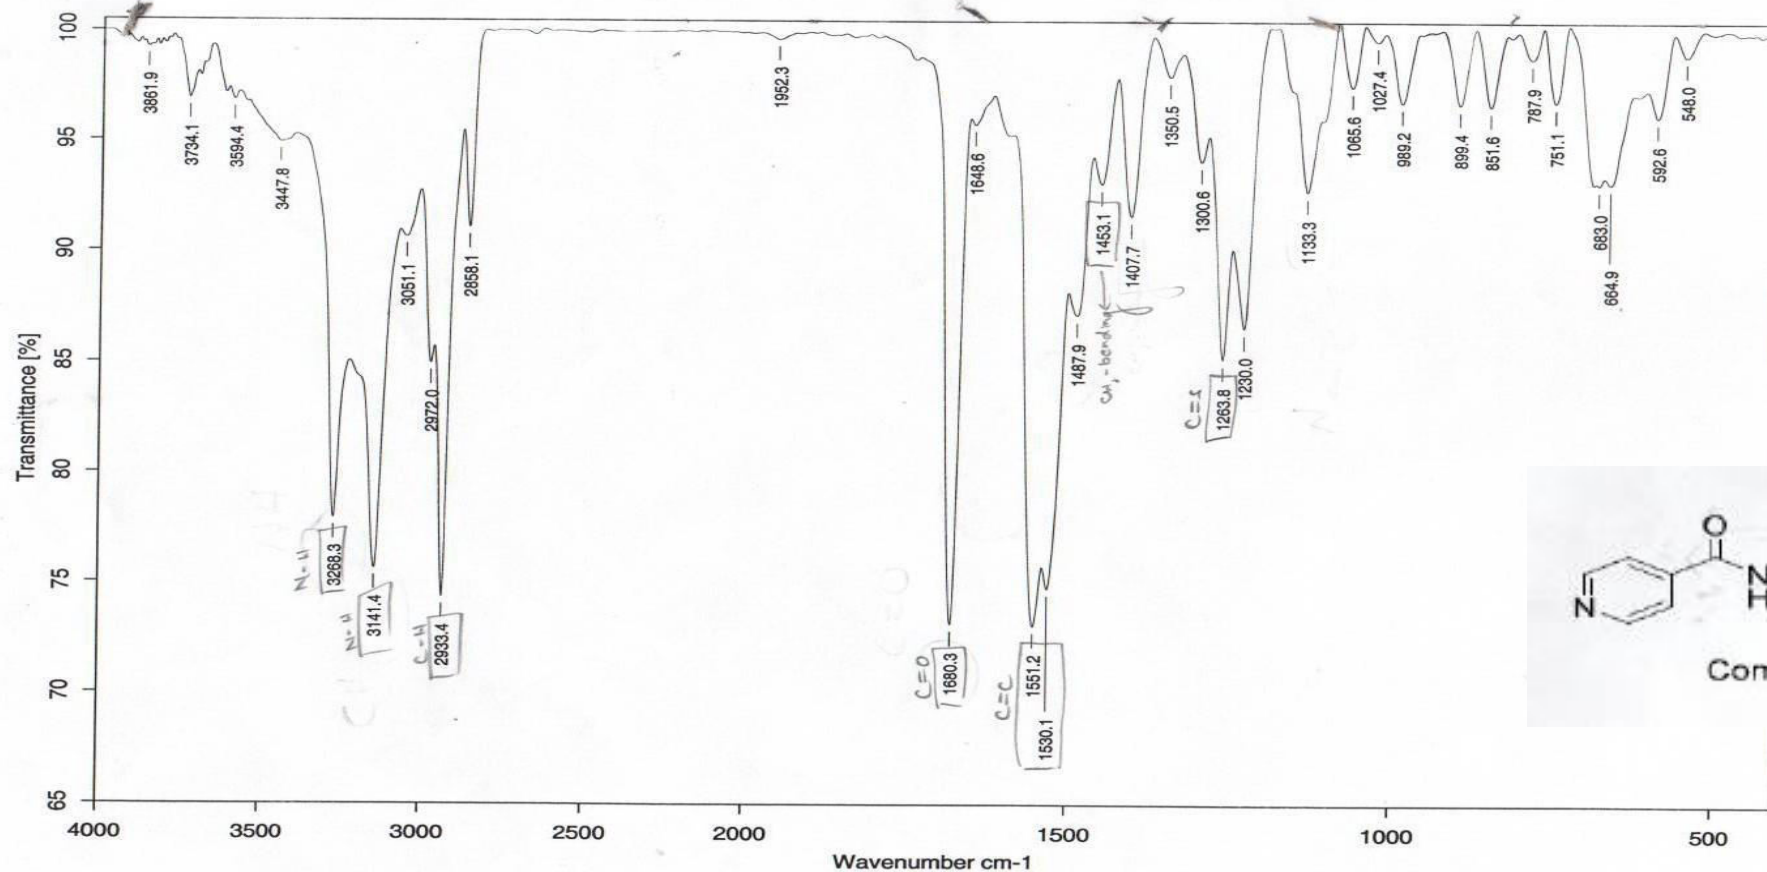

Sample : Fz-I-Iso28/Fazila Rizvi/Dr. Hina

Measured : 29/12/2016 on VECTOR22

Resolution : 4  $\text{cm}^{-1}$  ( 10 scans )

Spectrum : Fz-I-Iso28.0 ( in D:\IRSTUDENT )

Technic : Solid

Analyst : M. Asif

600 mg

Fazila rizvi/Dr.Hina/Fz-I-iso29  
1H

10.899  
10.840  
10.752  
10.013  
9.848  
9.789  
8.769  
8.765  
8.754  
8.749  
8.681  
7.847  
7.827  
7.429  
7.405  
7.351  
7.299  
7.254  
7.180  
7.156  
7.132

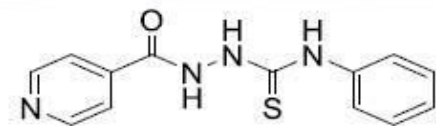

Compound 24

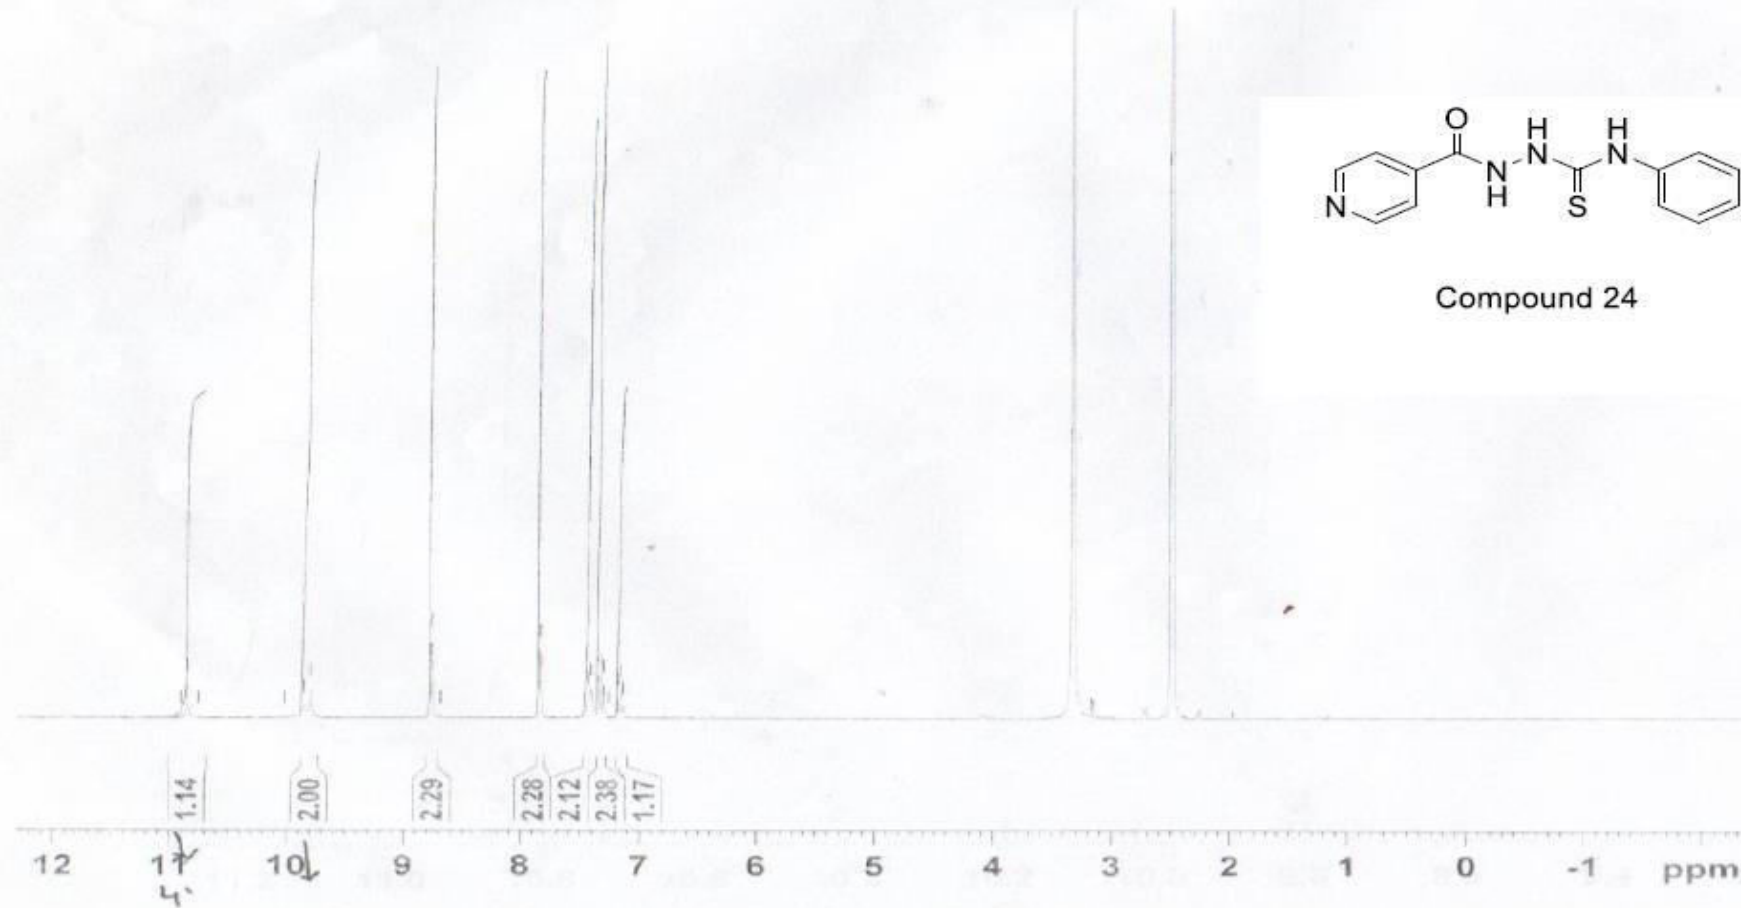

EXPNO 6  
PROCNO 1

F2 - Acquisition Parameters  
Date\_ 20161117  
Time 11.58  
INSTRUM Spect  
PROBHD 5 mm BBO BB-1H  
PULPROG zg30  
TD 32768  
SOLVENT DMSO  
NS 64  
DS 0  
SWH 6188.119 Hz  
FIDRES 0.188846 Hz  
AQ 2.6476543 sec  
RG 203  
DW 80.800 usec  
DE 6.50 usec  
TE 300.0 K  
D1 2.00000000 sec  
TDO 1

----- CHANNEL f1 -----  
NUC1 1H  
P1 12.50 usec  
PL1 0 dB  
PL1W 13.16228485 W  
SFO1 300.1324010 MHz

F2 - Processing parameters  
SI 32768  
SF 300.1300040 MHz  
WDW EM  
SSB 0  
LB 0.30 Hz  
GB 0  
PC 1.00

5.6 H<sub>3</sub>  
4 - a = 0  
3 - 3 = 3  
0 - 1 = 0

10.905  
10.899  
10.840  
10.752

9.818  
9.789

8.769  
8.765  
8.754  
8.681

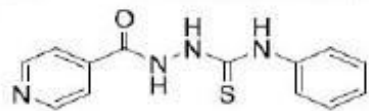

Compound 24

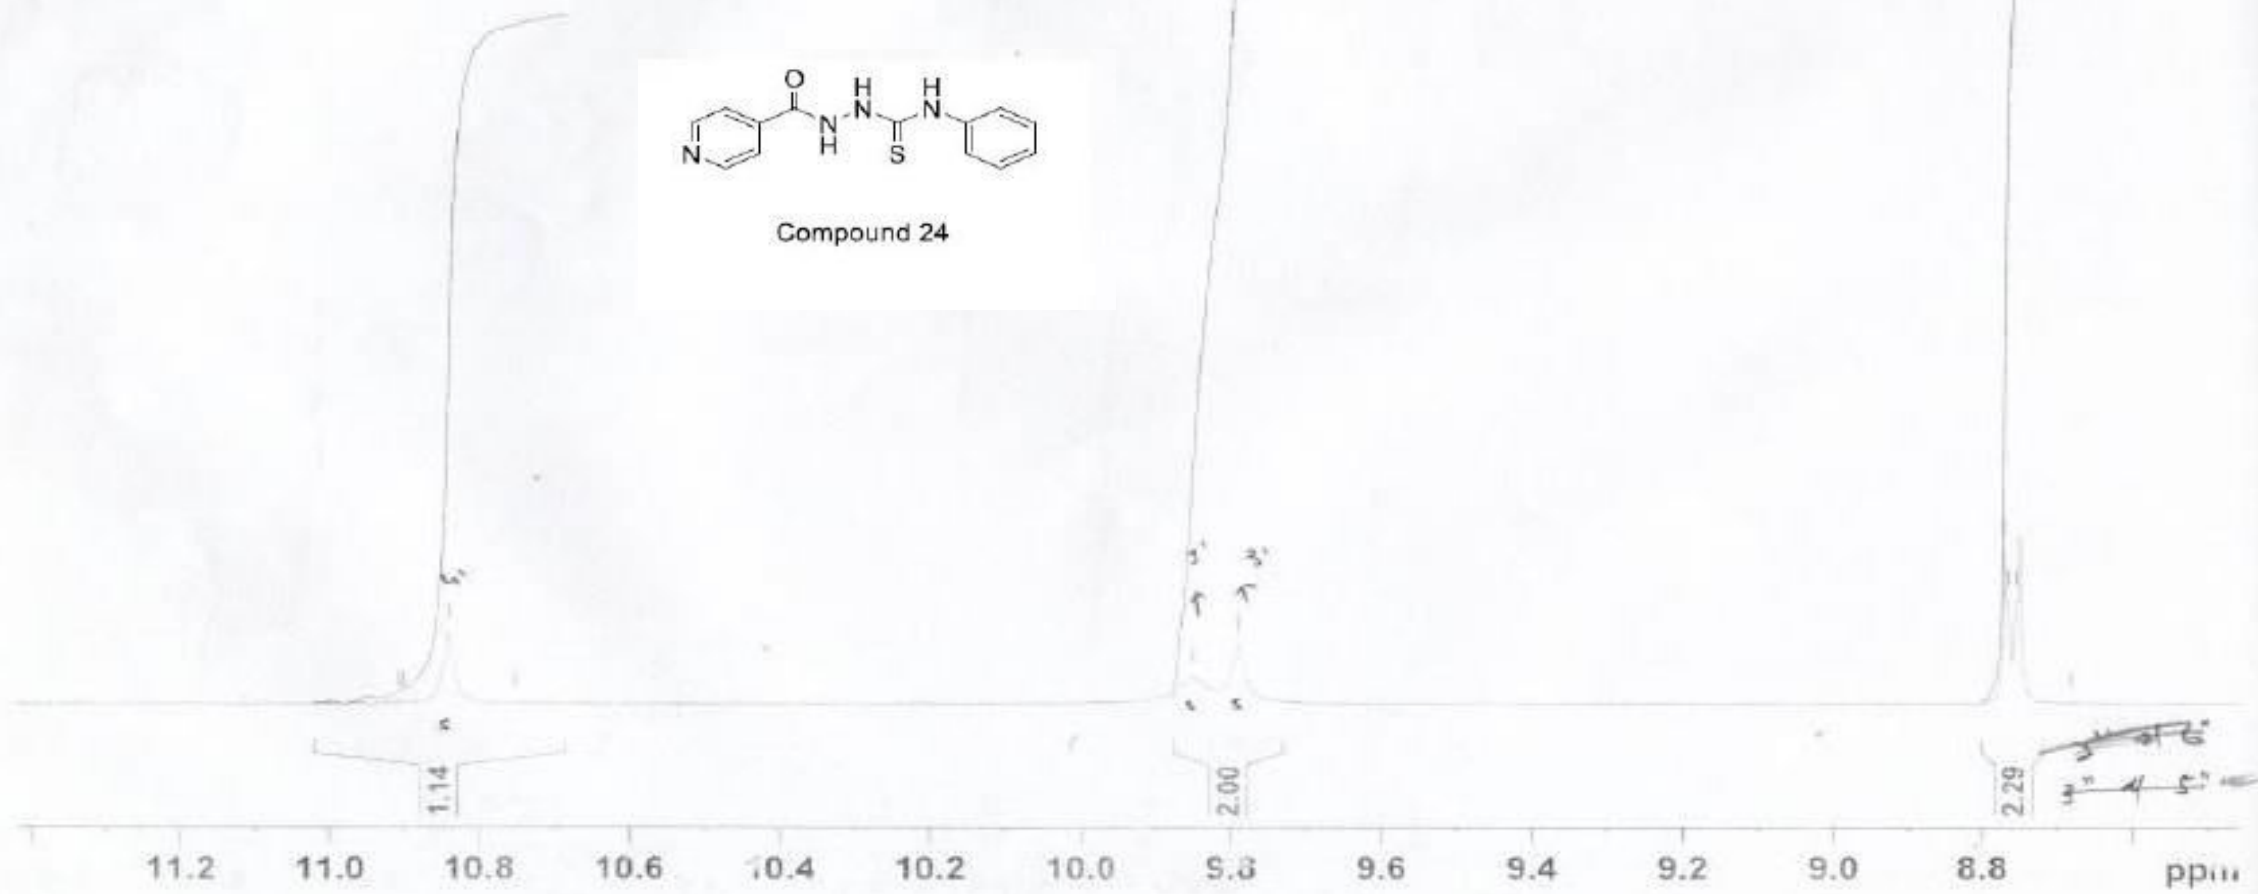

1.14

2.00

2.29

ppm

a rizvi/Dr.Hina/F2-I-iso29

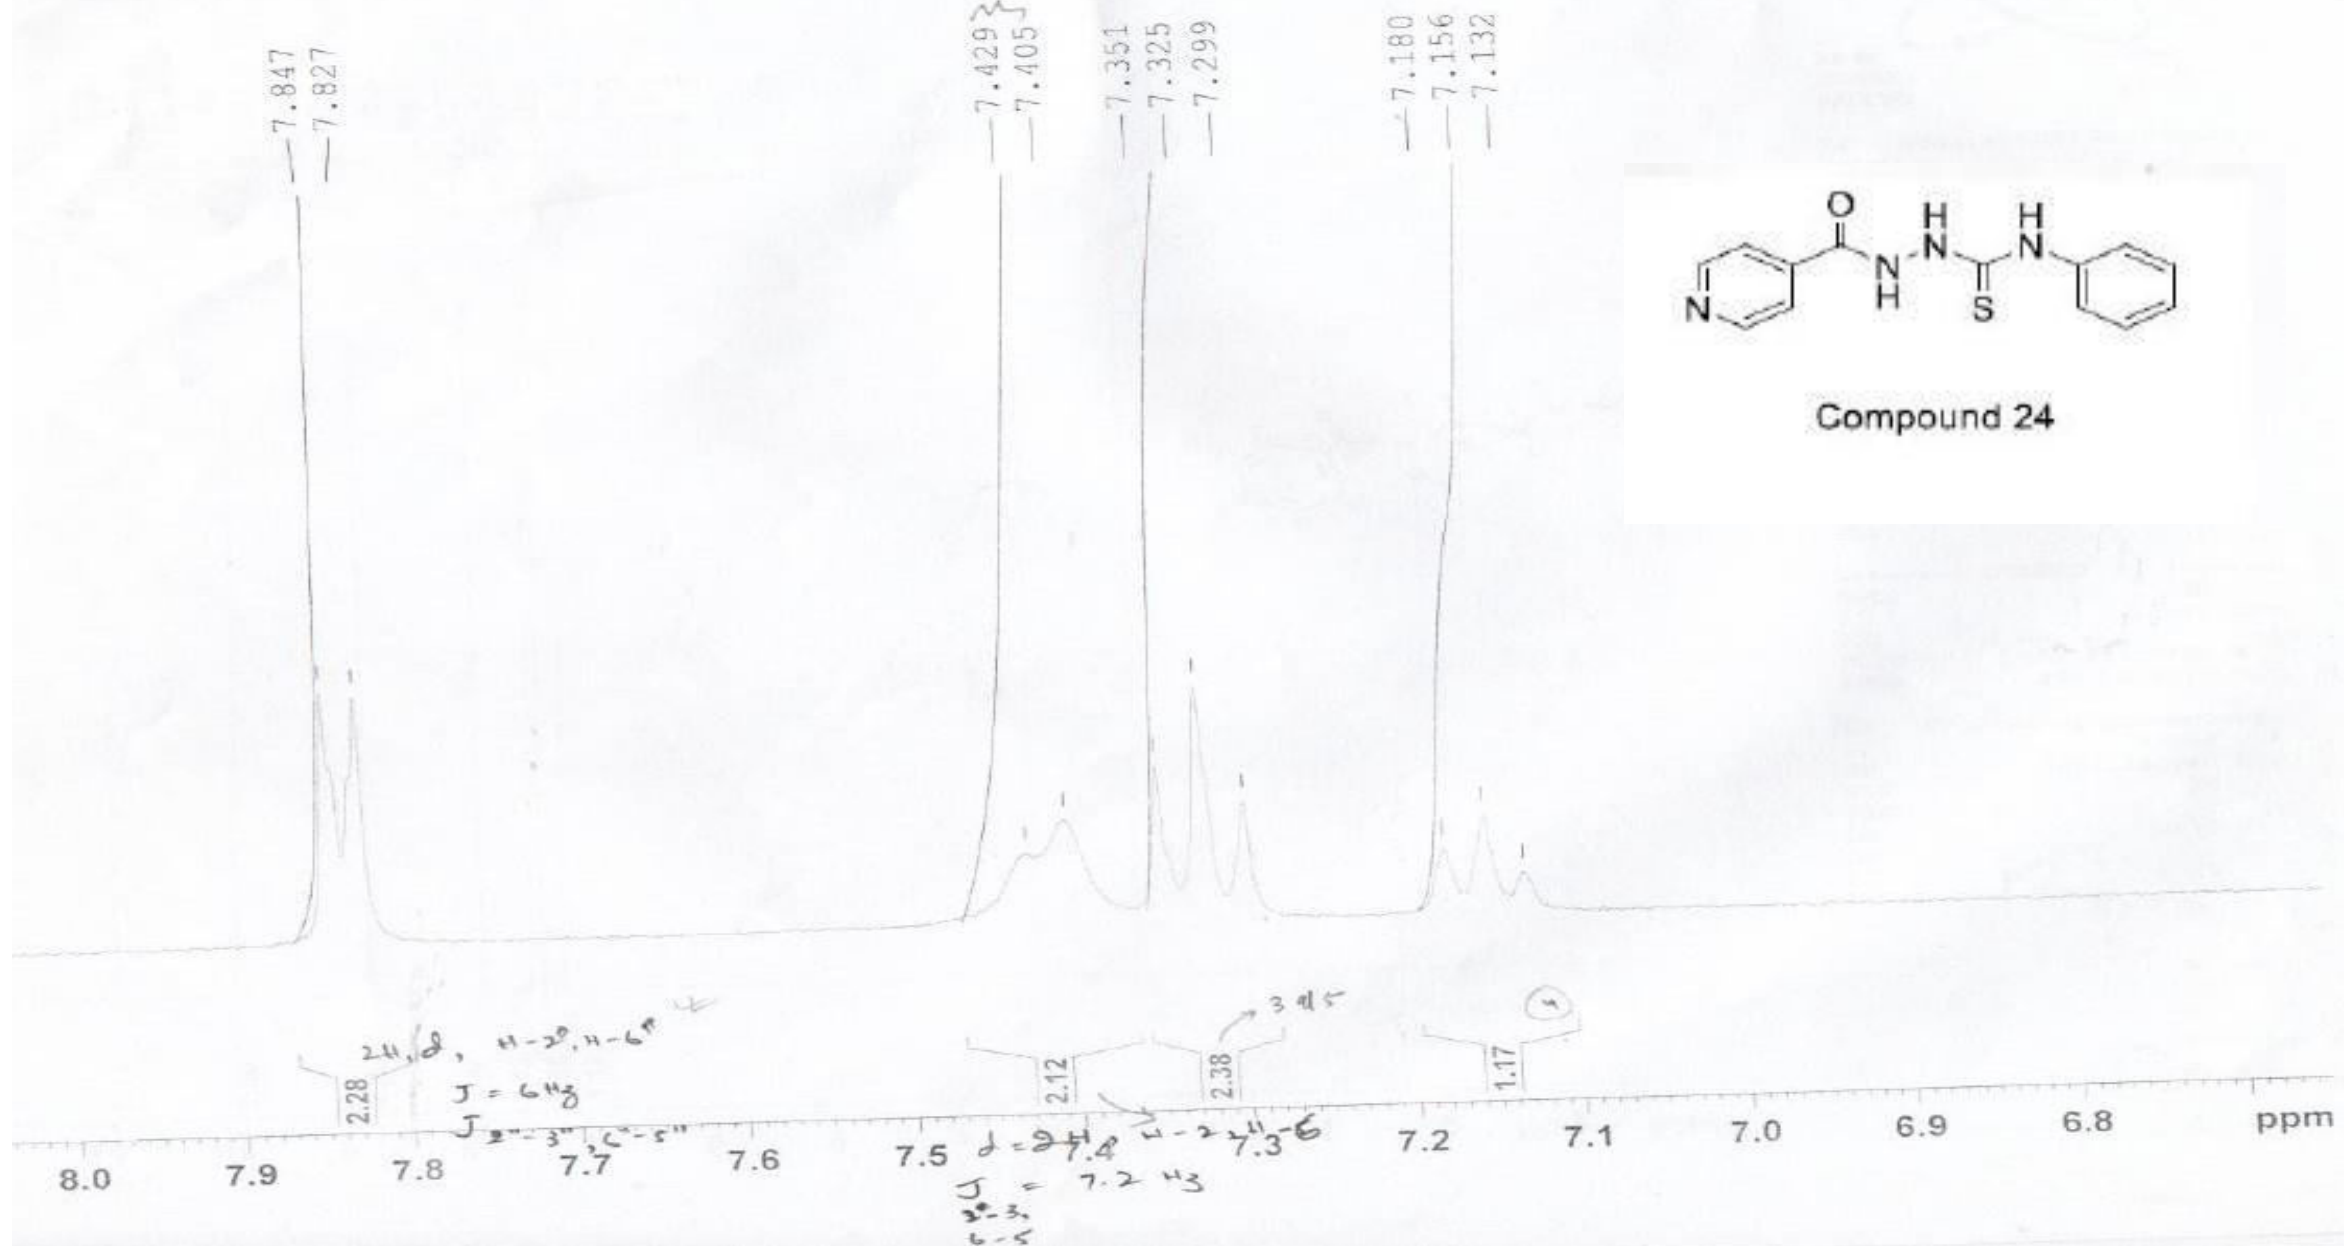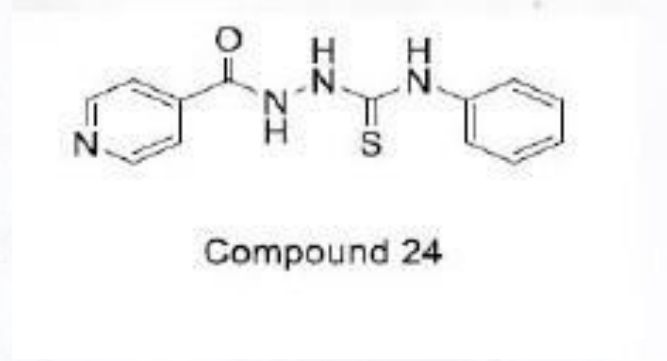

File: FZ-I-ISO29-FABP  
Sample: bushra qamar /dr. hina  
Instrument: JEOL-600H-2  
Inlet: Direct Probe

Date Run: 10-21-2016 (Time Run: 10:35:30)

Ionization mode: FAB+

Scan: 7  
Base: m/z 185; 37.3%FS TIC: 912828

R.T.: .53

#Ions: 66

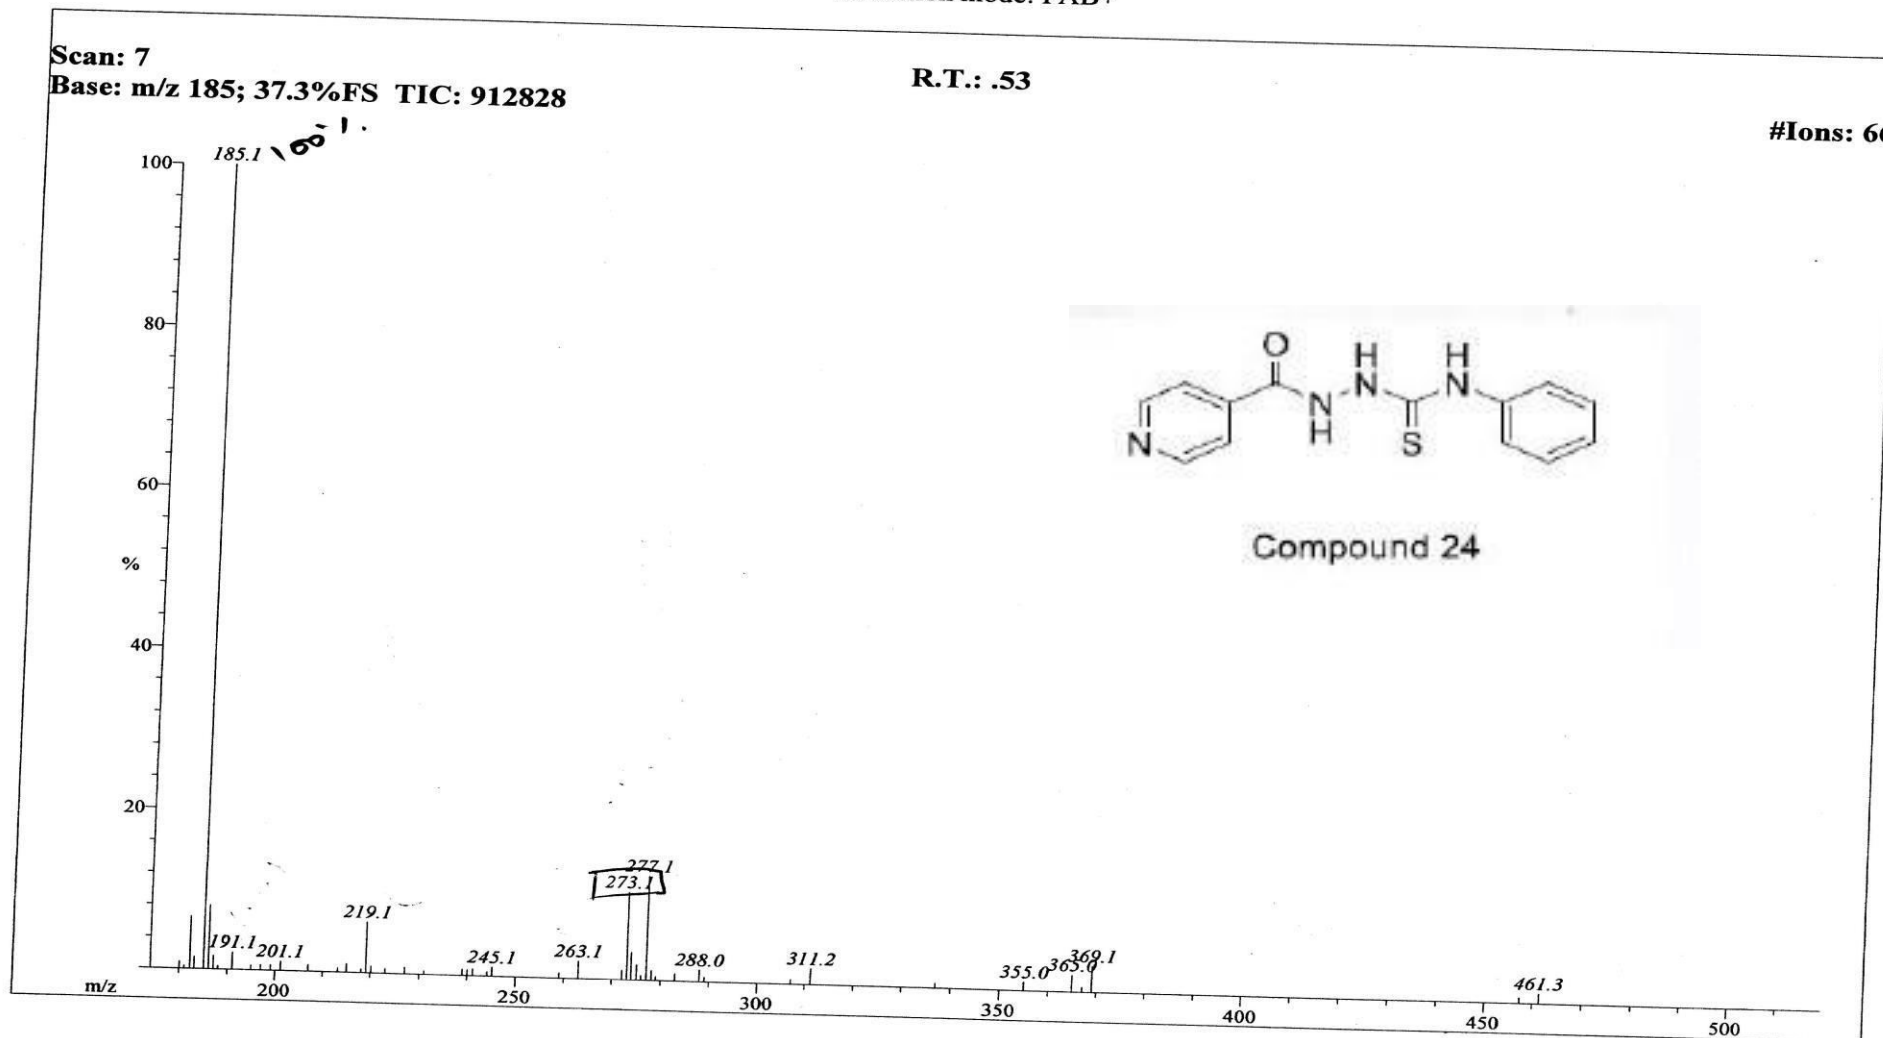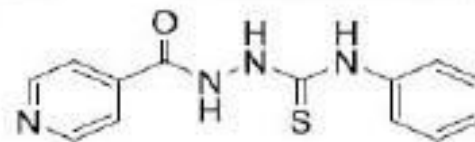

Compound 24



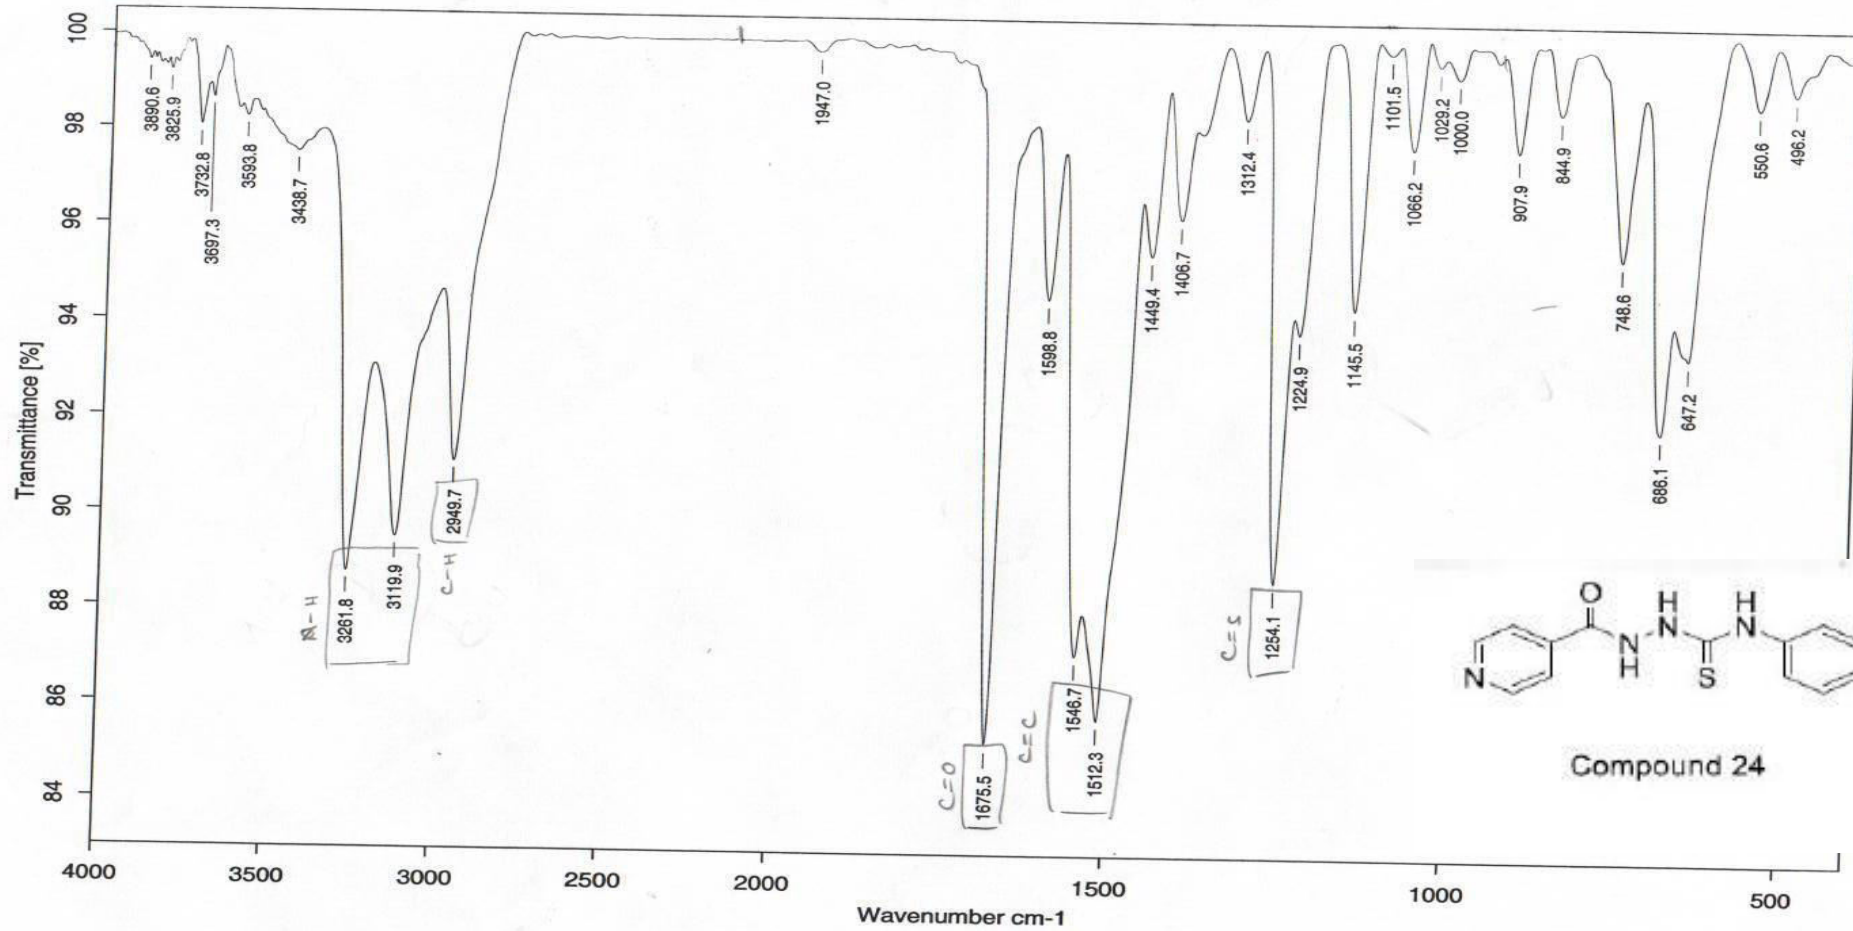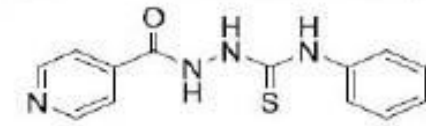

Compound 24

Sample : Fz-I-Iso29/Fazila Rizvi/Dr. Hina

Measured : 29/12/2016 on VECTOR22

Resolution : 4  $\text{cm}^{-1}$  ( 10 scans )

Spectrum : Fz-I-Iso29.0 ( in D:\IRSTUDENT )

Technic : Solid

Analyst : M. Asif

Fazila/DR.Hina/Fz-I-ISO30  
 ICCBS, U.O.K/1H

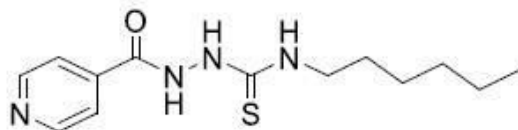

Compound 25

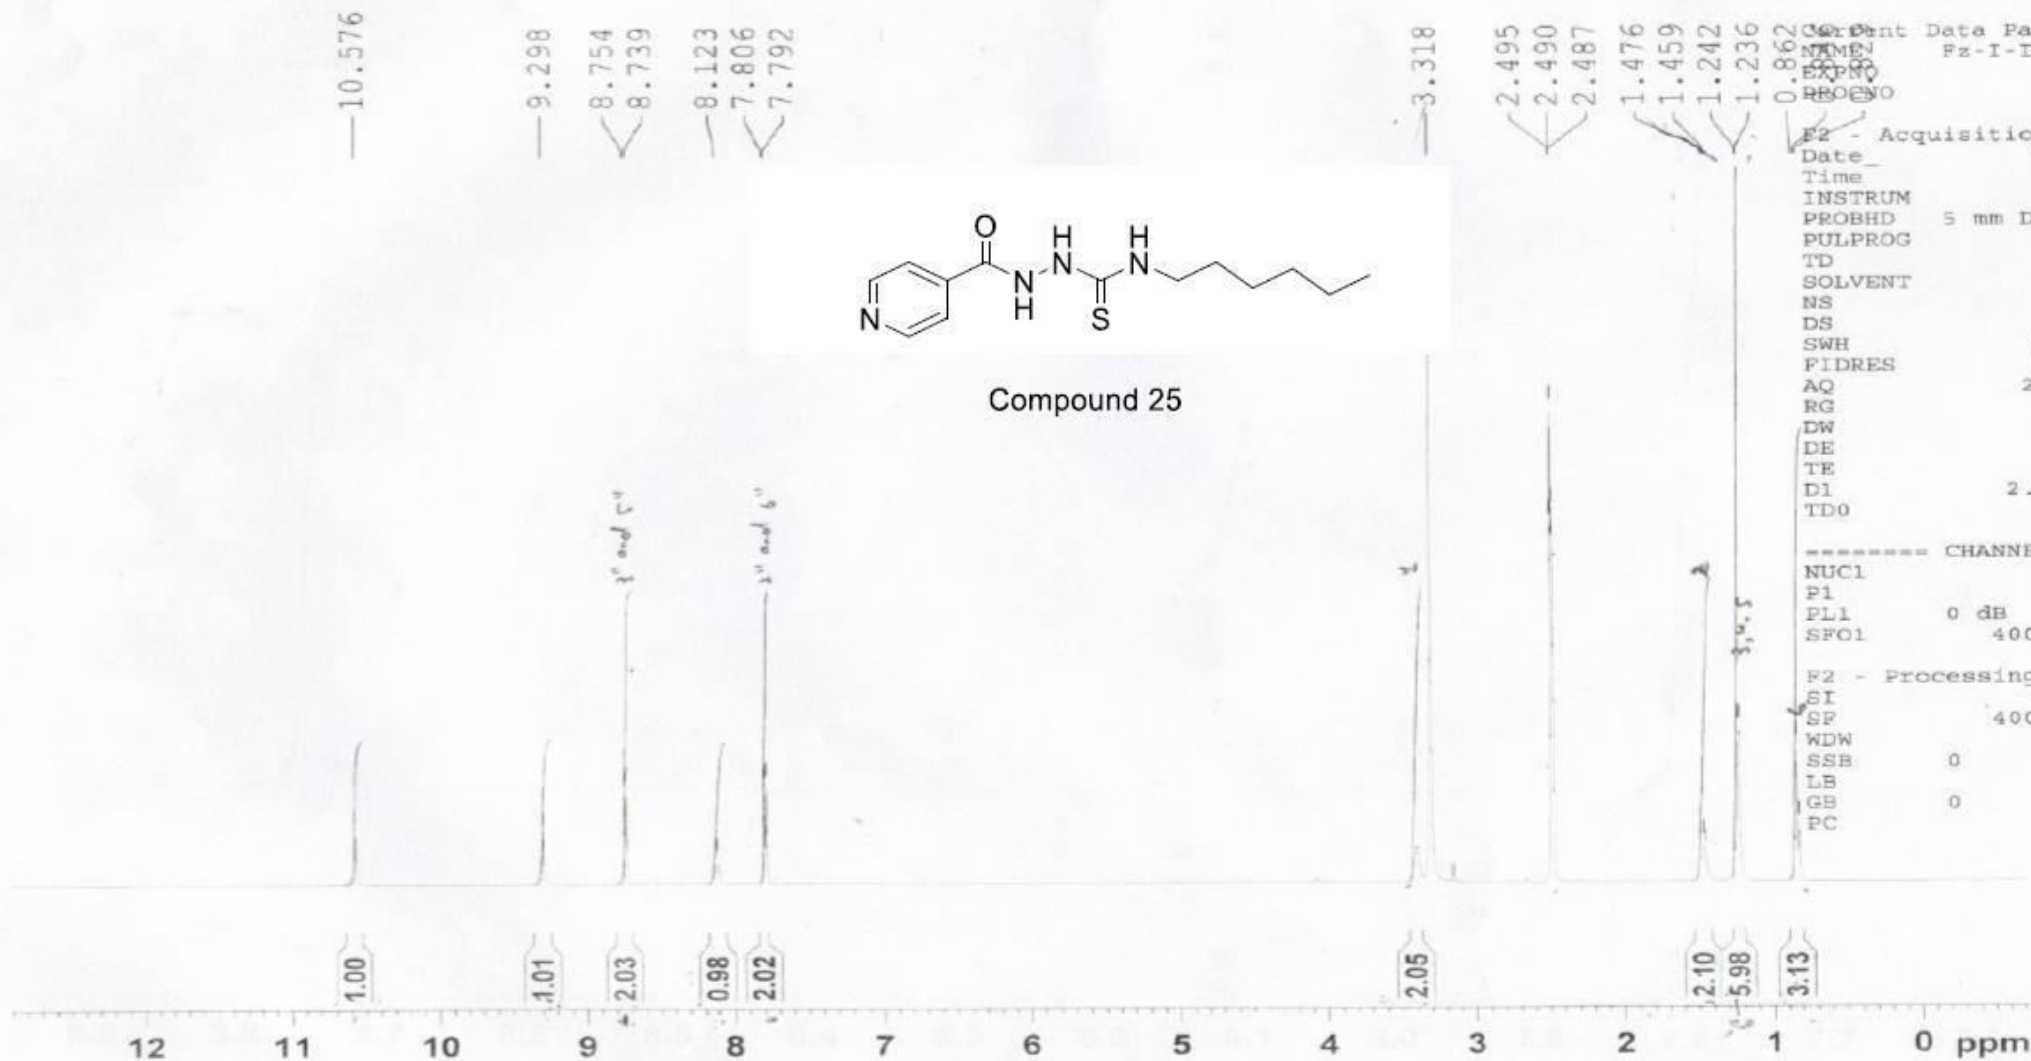

===== Channel f1 =====  
 NUC1 1H  
 P1 8.40 usec  
 PL1 0 dB  
 SFO1 400.1332010 MHz

F2 - Acquisition Parameters  
 Date 20170418  
 Time 15.32  
 INSTRUM spect  
 PROBHD 5 mm DUL 13C-1  
 PULPROG zg30  
 TD 32768  
 SOLVENT DMSO  
 NS 64  
 DS 0  
 SWH 8012.820 Hz  
 FIDRES 0.244532 Hz  
 AQ 2.0447233 sec  
 RG 322.5  
 DW 62.400 usec  
 DE 6.50 usec  
 TE 300.0 K  
 D1 2.00000000 sec  
 TDO 1

F2 - Processing parameters  
 SI 16384  
 SF 400.1300065 MHz  
 WDW EM  
 SSB 0  
 LB 0.30 Hz  
 GB 0  
 PC 1.00

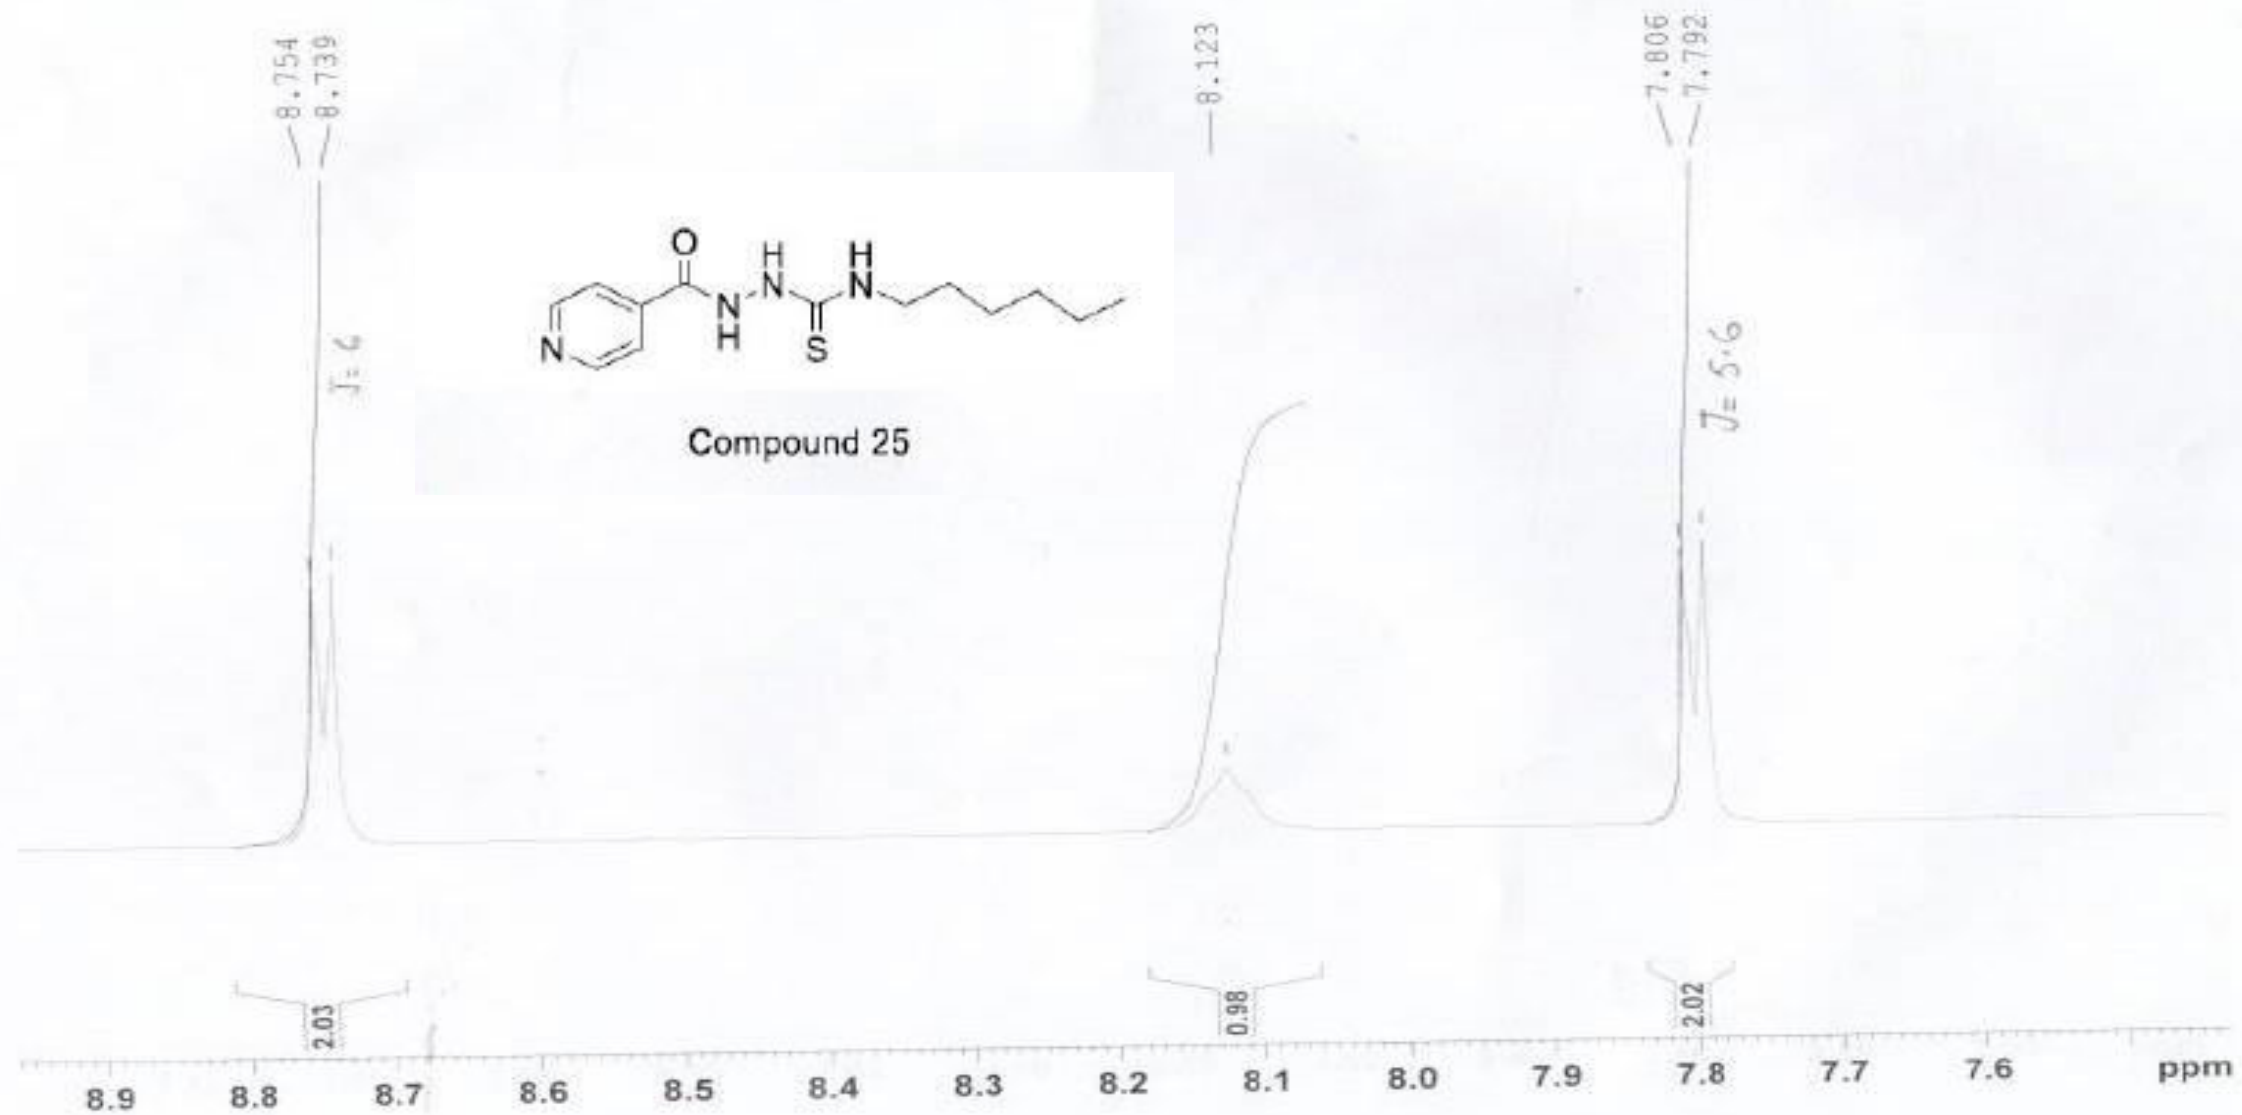

File: FZ-I-ISO30-FABN  
Sample: BUSHRA QAMAR /DR. HINA  
Instrument: JEOL-600H-2  
Inlet: Direct Probe

Date Run: 10-20-2016 (Time Run: 12:51:42)

Ionization mode: FAB-

Scan: 2

R.T.: .1

Base: m/z 183; 99.4%FS TIC: 5607252

#Ions: 1318

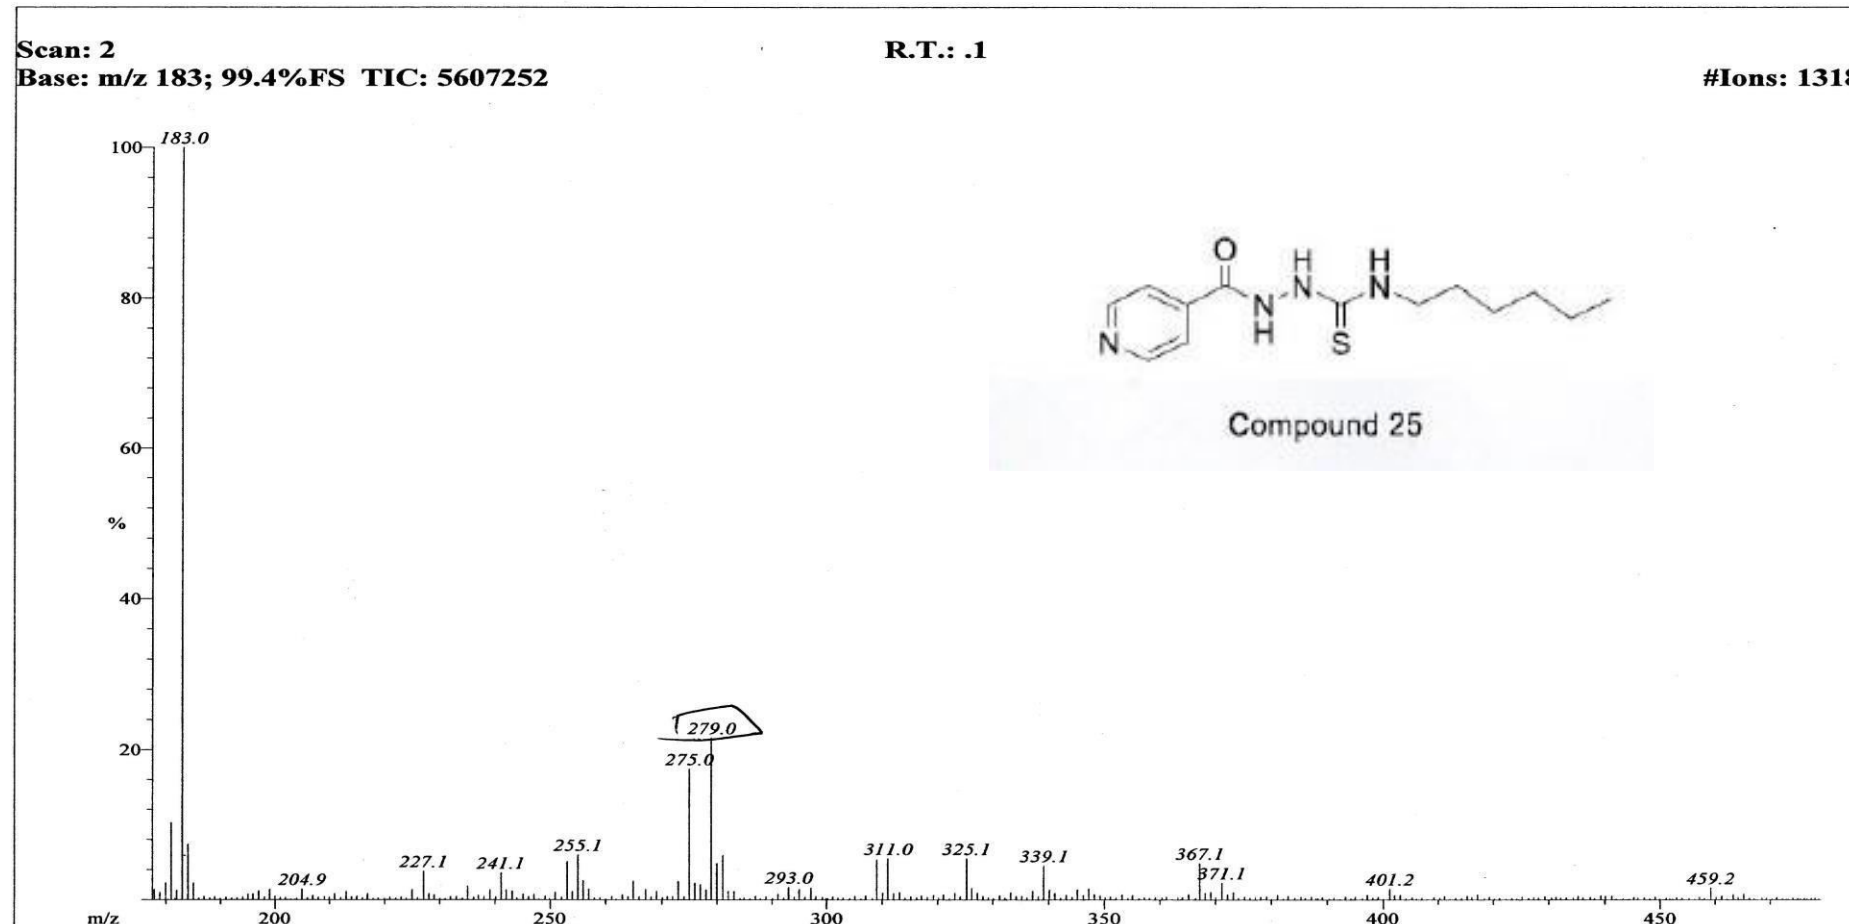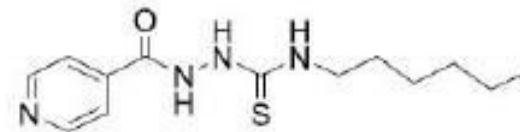

Compound 25

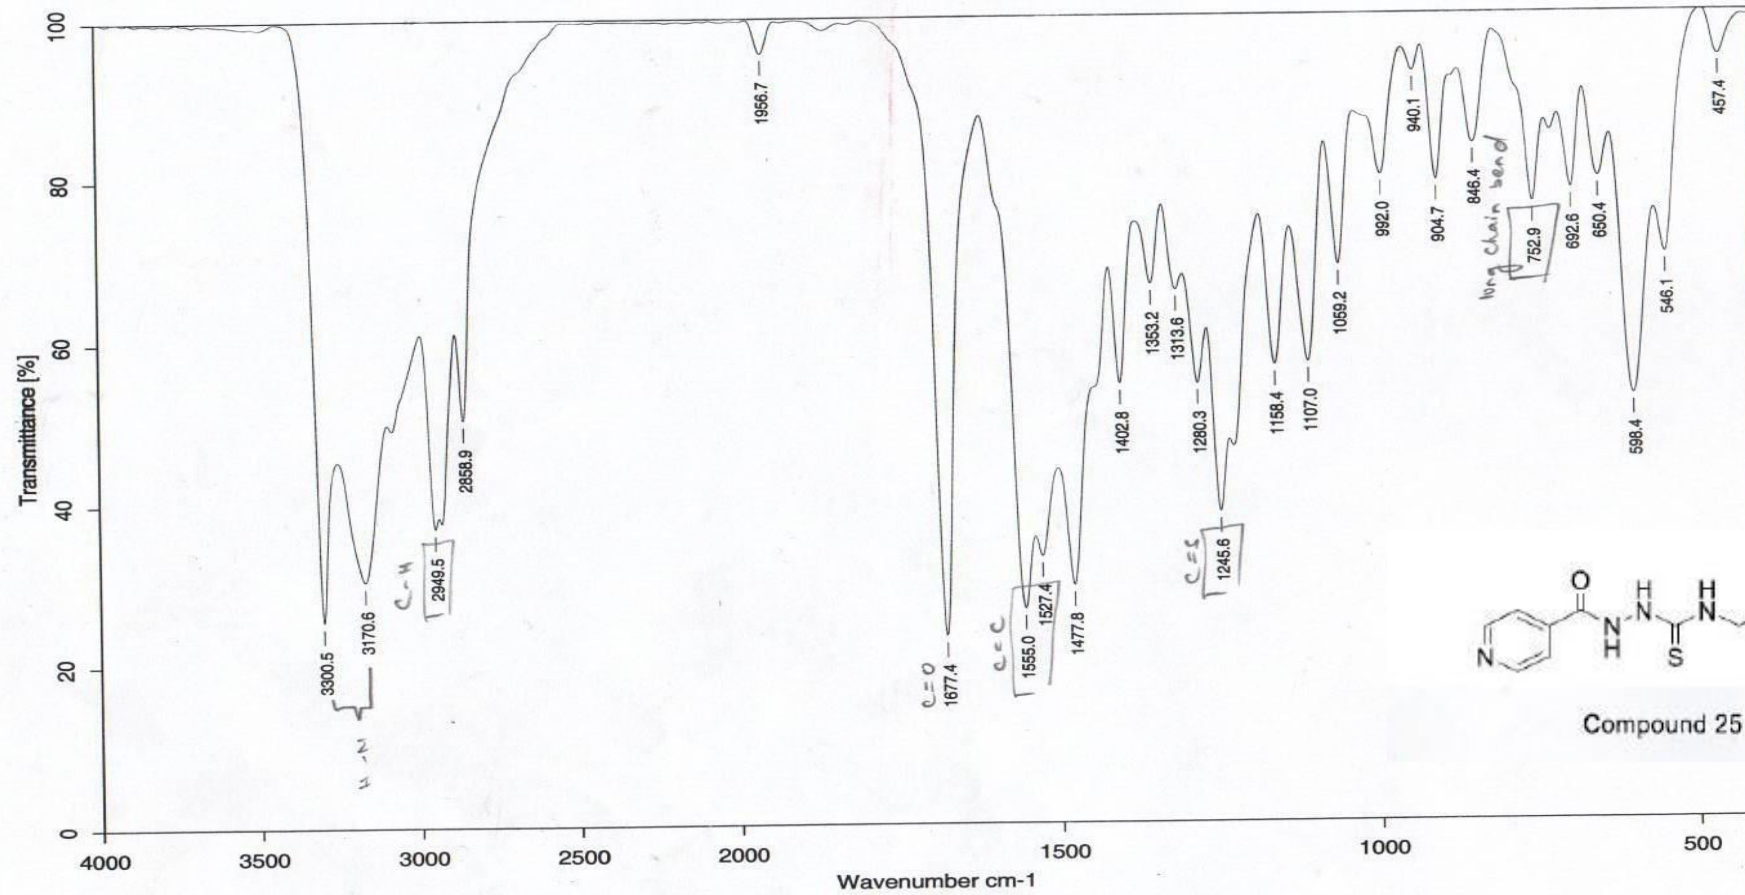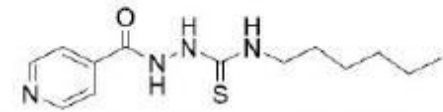

Compound 25

Sample : FZI-ISO30/Fazila Rizvi

Measured : 19/04/2017 on VECTOR22

Resolution : 4  $\text{cm}^{-1}$  ( 10 scans )

Spectrum : FZ-I-ISO30.0 ( in D:\IRSTUDENT )

Technic : Solid

Analyst : MA/ZA/JS

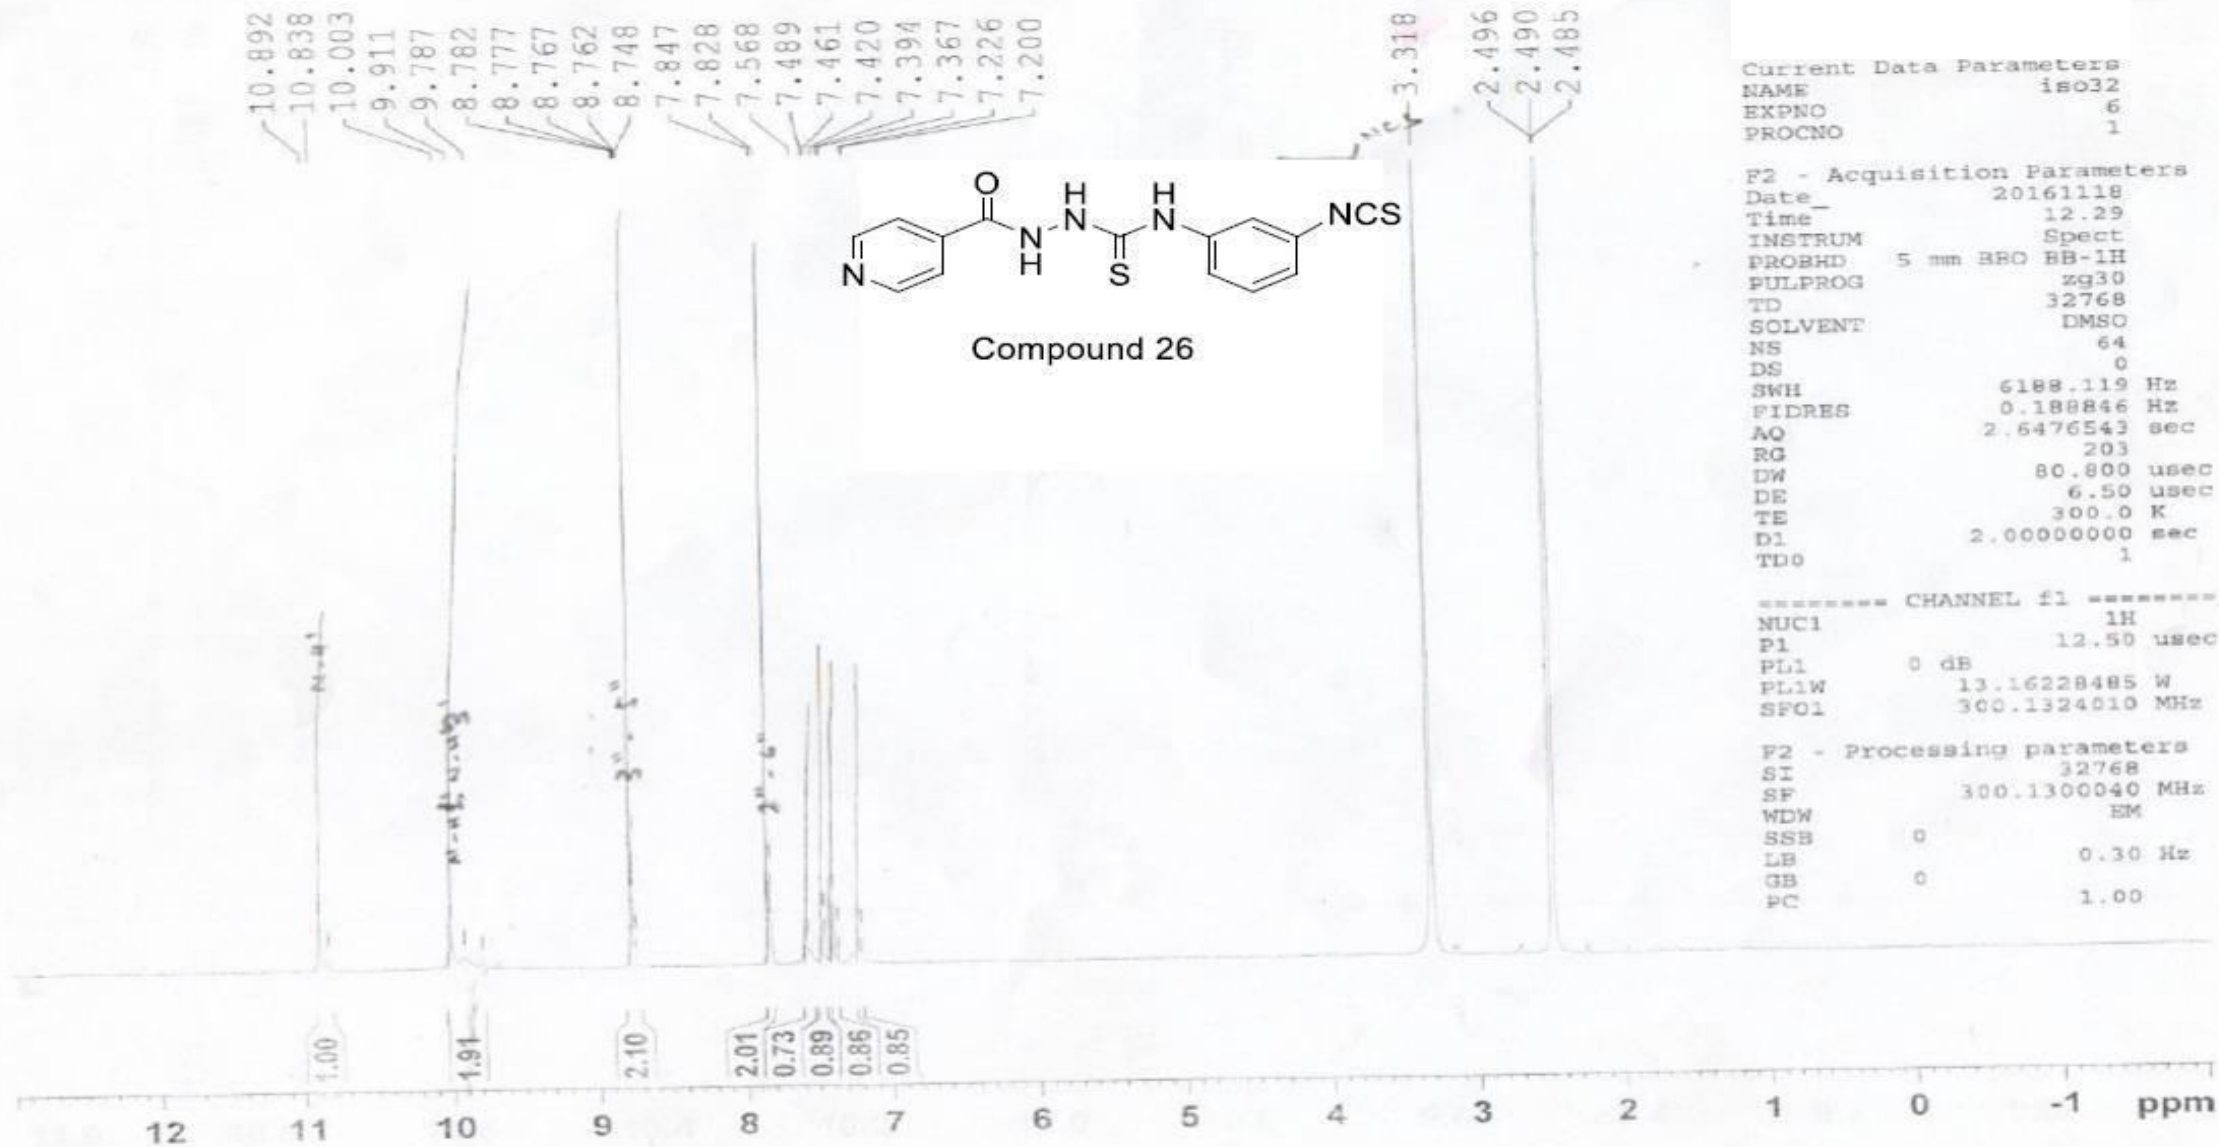

Current Data Parameters

|        |       |
|--------|-------|
| NAME   | iso32 |
| EXPNO  | 6     |
| PROCNO | 1     |

F2 - Acquisition Parameters

|         |                |
|---------|----------------|
| Date_   | 20161118       |
| Time    | 12.29          |
| INSTRUM | Spect          |
| PROBHD  | 5 mm BBO BB-1H |
| PULPROG | zg30           |
| TD      | 32768          |
| SOLVENT | DMSO           |
| NS      | 64             |
| DS      | 0              |
| SWH     | 6188.119 Hz    |
| FIDRES  | 0.188846 Hz    |
| AQ      | 2.6476543 sec  |
| RG      | 203            |
| DW      | 80.800 usec    |
| DE      | 6.50 usec      |
| TE      | 300.0 K        |
| D1      | 2.00000000 sec |
| TD0     | 1              |

===== CHANNEL f1 =====

|      |                 |
|------|-----------------|
| NUC1 | 1H              |
| P1   | 12.50 usec      |
| PL1  | 0 dB            |
| PL1W | 13.16228485 W   |
| SFO1 | 300.1324010 MHz |

F2 - Processing parameters

|     |                 |
|-----|-----------------|
| SI  | 32768           |
| SF  | 300.1300040 MHz |
| WDW | EM              |
| SSB | 0               |
| LB  | 0.30 Hz         |
| GB  | 0               |
| PC  | 1.00            |

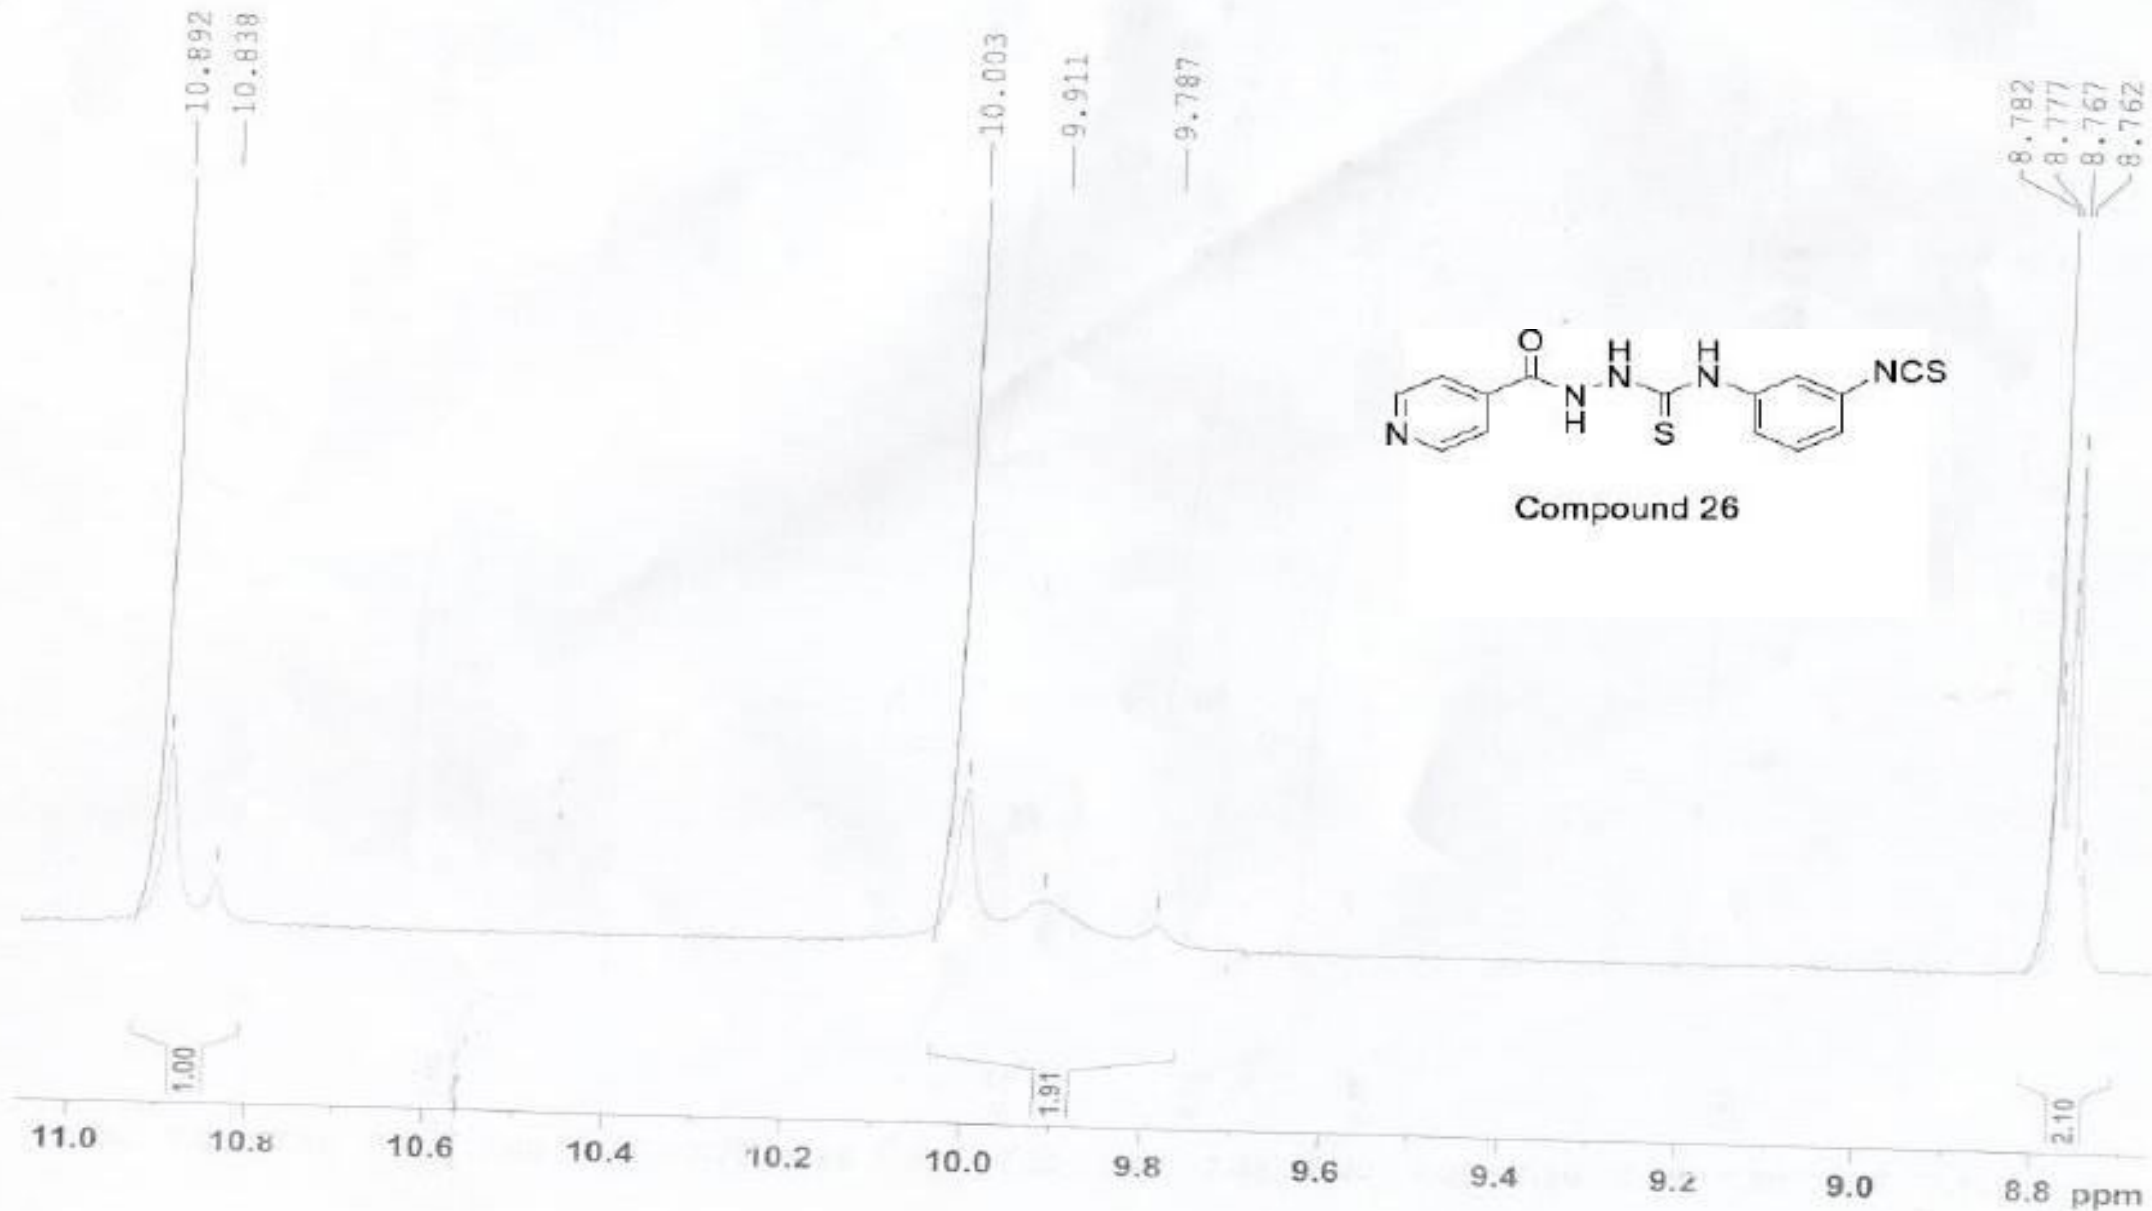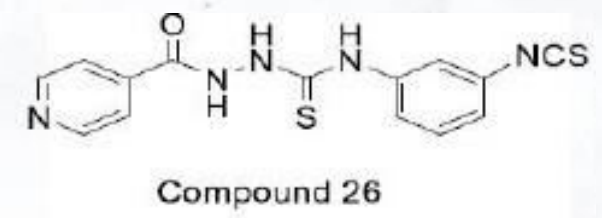

File: FZ-I-ISO32-FABN  
Sample: BUSHRA QAMAR /DR. HINA  
Instrument: JEOL-600H-2  
Inlet: Direct Probe

Date Run: 10-27-2016 (Time Run: 12:13:20)

Ionization mode: FAB-

Scan: 5

Base: m/z 183; 100%FS TIC: 5774642

R.T.: .37

#Ions: 1271

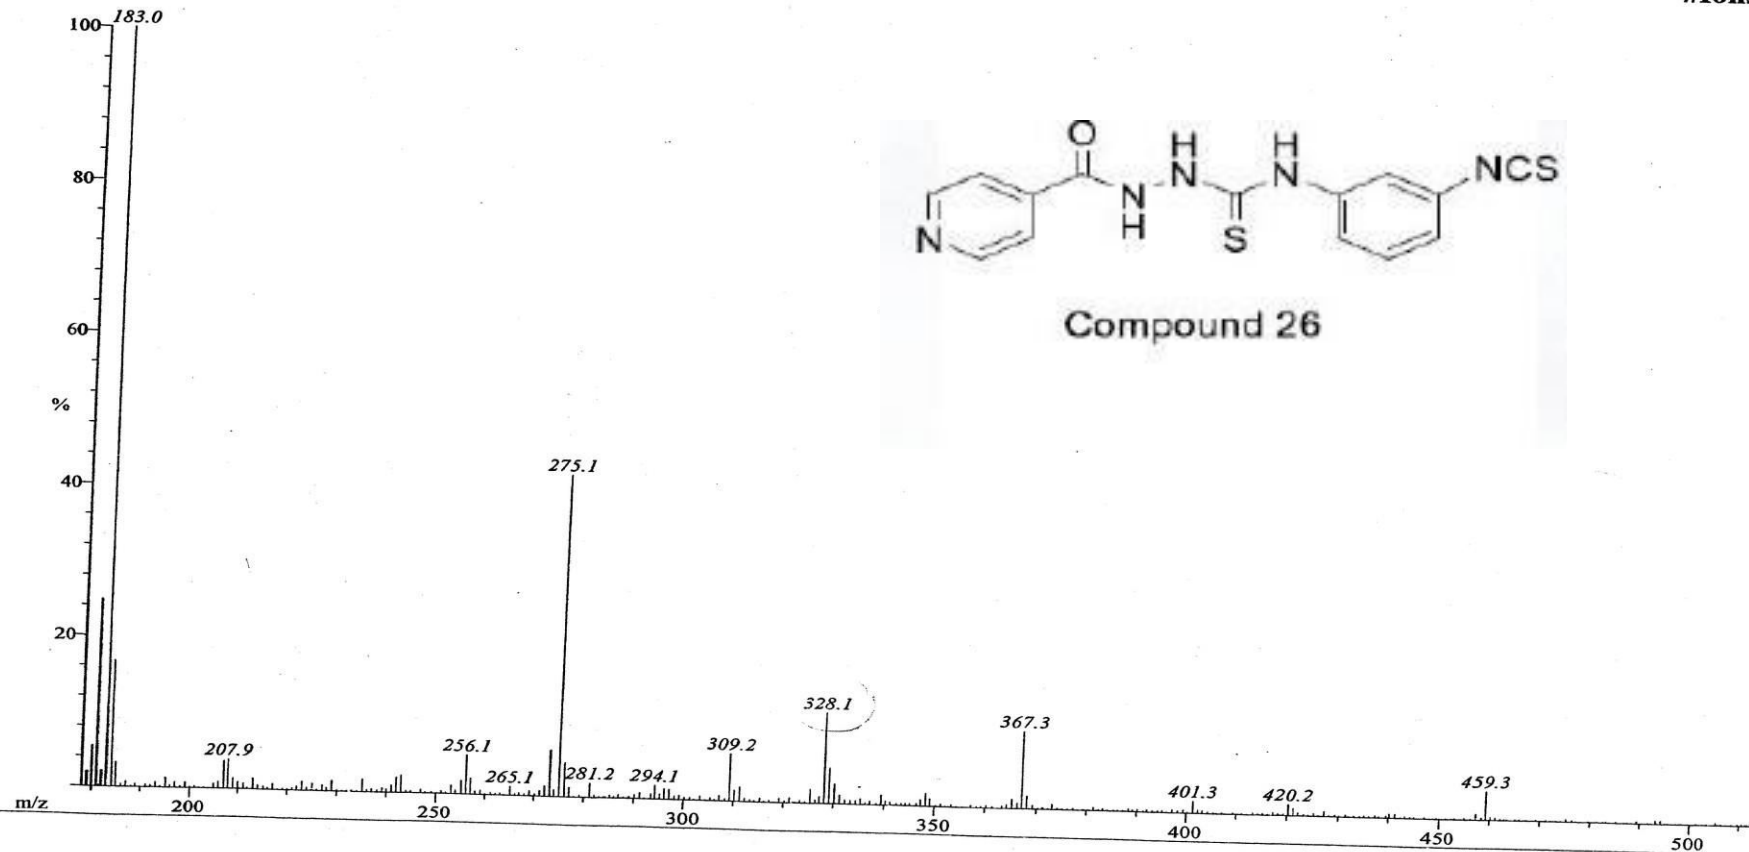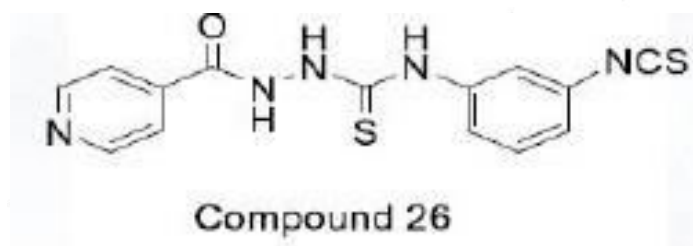



Fazila / D. Hina / FZ-I-ISO32  
BB

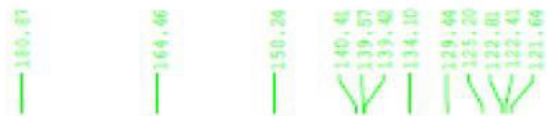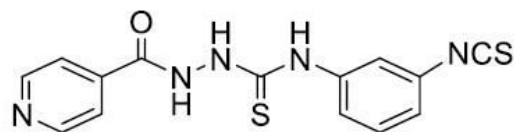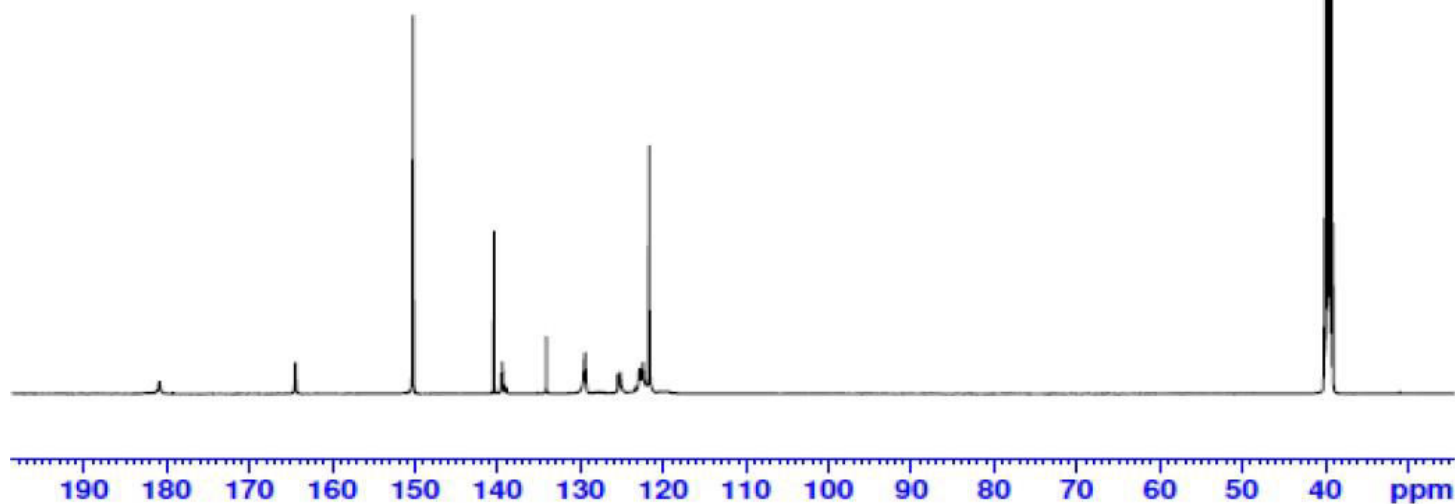

```
parameters
NAME          ISO32 NMR
EXPNO         1
PROCNO        1

F2 - Acquisition Parameters
Data_         20190205
Time          23.45 h
INSTRUM      Avance Neo 500
PROBHD       Z44862_0021 (C
PULPROG      zgpg
TD            32768
SOLVENT      DMSO
NS            16384
DS            8
SWH           30120.482 Hz
FIDRES        1.838408 Hz
AQ            0.5439488 sec
RG            101
DW            16.600 usec
DE            20.00 usec
TE            298.0 K
D1            2.0000000 sec
D11           0.03000000 sec
TD0           16
SFO1          125.8227986 MHz
NUC1          13C
P1            10.00 usec
PLW1          26.46199989 W
SFO2          500.3320013 MHz
NUC2          1H
CPDPRG[2]    waltz65
PCPD2         80.00 usec
PLW2          9.74149990 W
PLW12         0.34246999 W
PLW13         0.17199001 W

F2 - Processing parameters
SI            16384
SF            125.8081399 MHz
WDW           EM
SSB           0
LB            1.00 Hz
GB            0
PC            1.40
```

Fazila / D. Hina / FZ-I-ISO32  
DEPT135

150.24

129.43

125.50

125.21

122.81

122.43

121.64

40.10

39.93

39.76

39.59

39.43

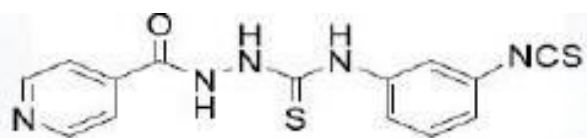

Compound 26

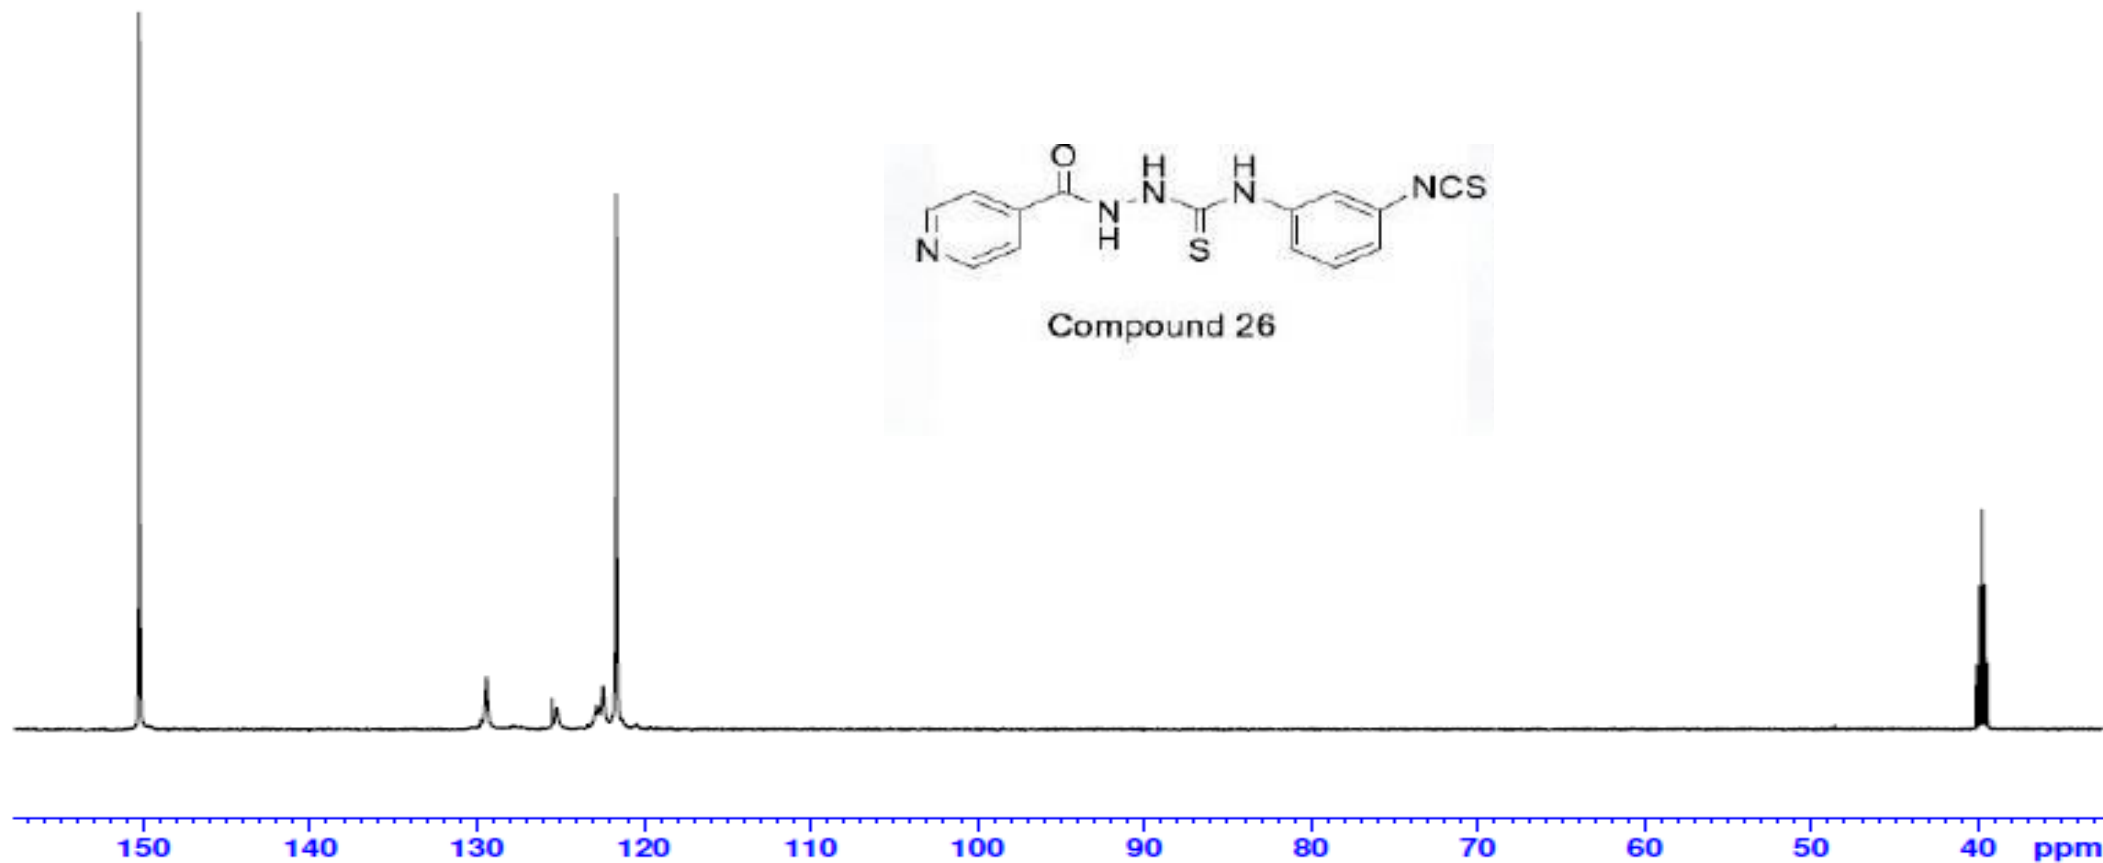

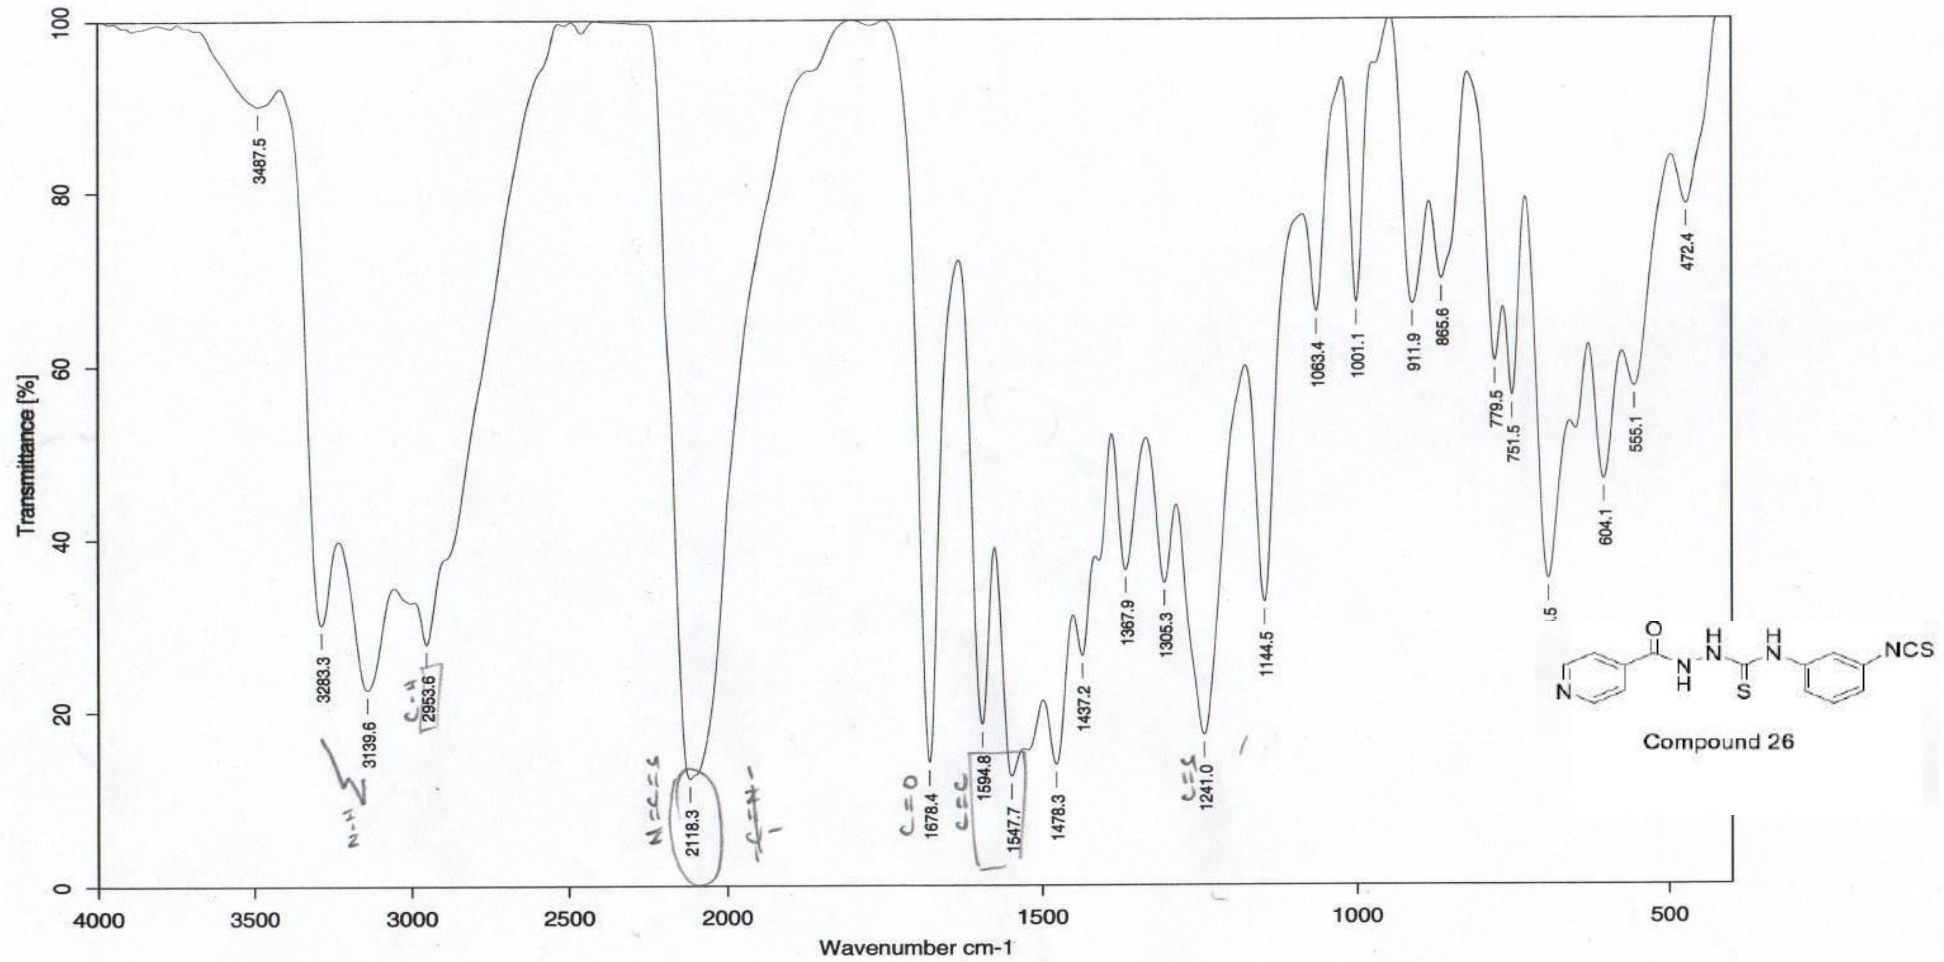

Sample : FZI-ISO32/Fazila Rizvi

Measured : 19/04/2017 on VECTOR22

Resolution : 4 cm<sup>-1</sup> ( 10 scans )

Spectrum : FZ-I-ISO32.0 ( in D:\IRSTUDENT )

Technic : Solid

Analyst : MA/ZA/JS

fazila rizvi/Dr.Hina/Fz-I-iso33

14

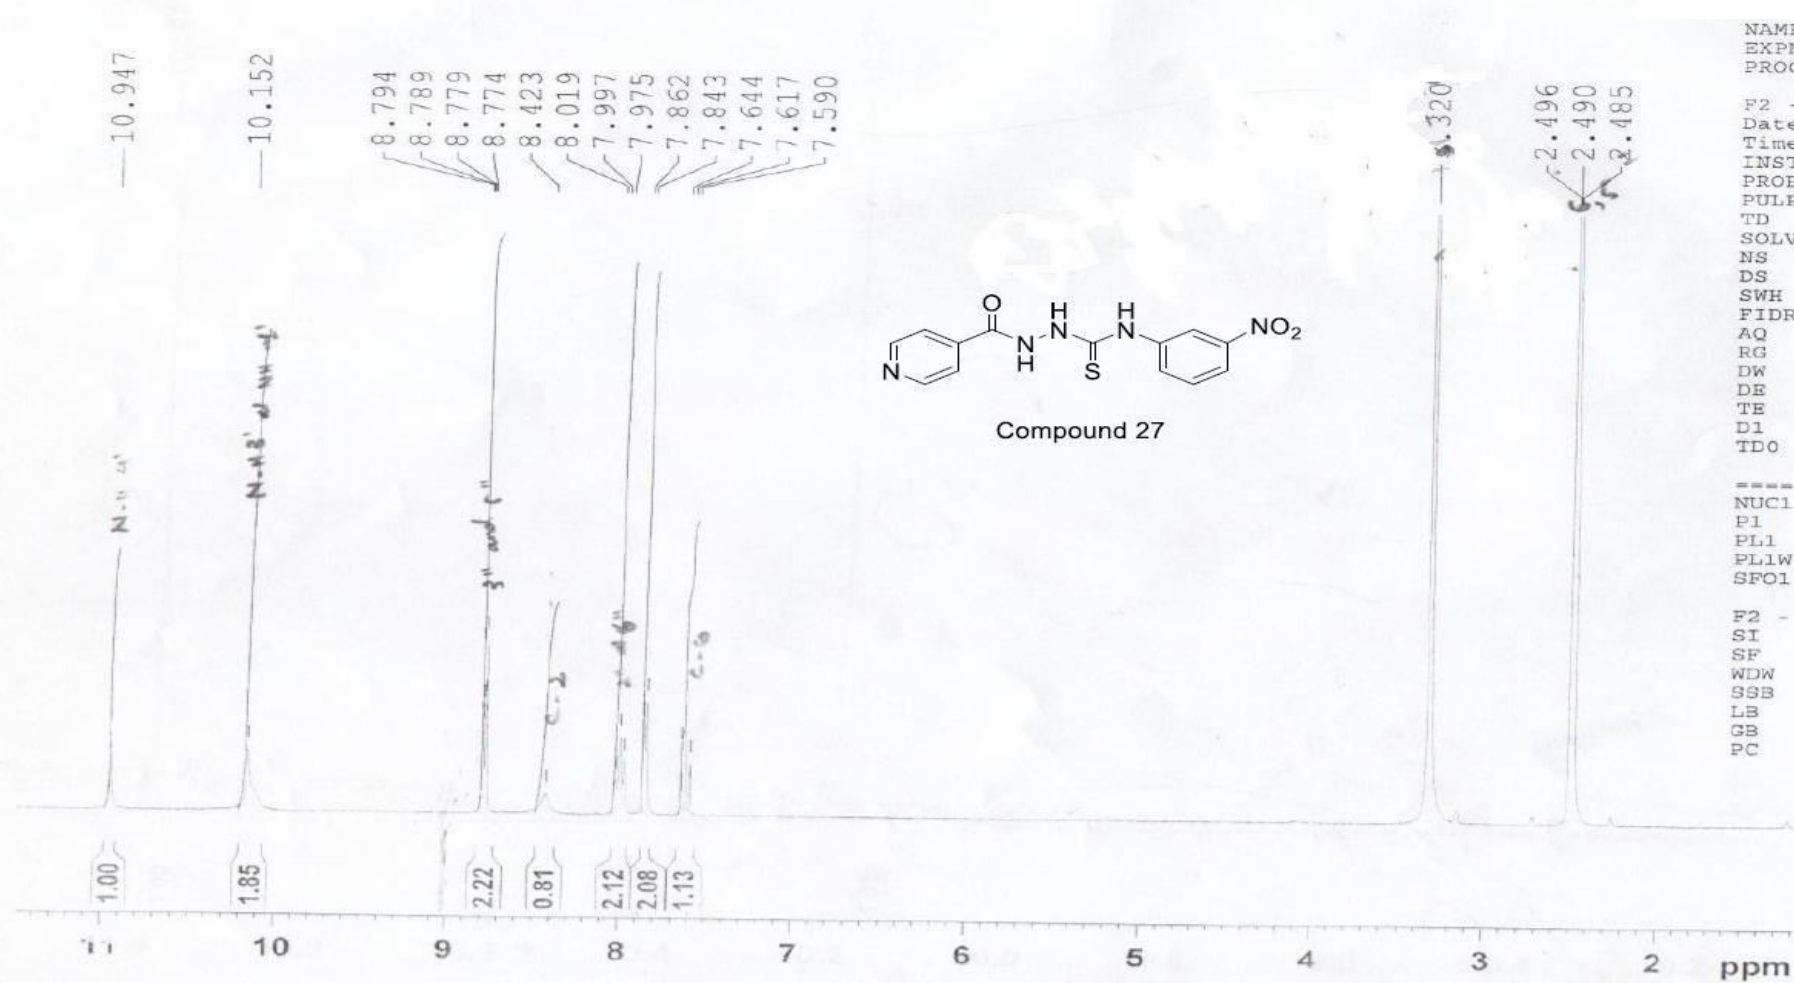

NAME  
EXPNO  
PROCNO

eters  
iso33  
7  
1

F2 - Acquisition Parameters

Date\_ 20161118  
Time\_ 12.39  
INSTRUM Spect  
PROBHD 5 mm BBO BB-1H  
PULPROG zg30  
TD 32768  
SOLVENT DMSO  
NS 64  
DS 0  
SWH 6188.119 Hz  
FIDRES 0.188846 Hz  
AQ 2.6476543 sec  
RG 203  
DW 80.800 usec  
DE 6.50 usec  
TE 300.0 K  
D1 2.00000000 sec  
TDO 1

==== CHANNEL f1 =====  
NUC1 1H  
P1 12.50 usec  
PL1 0 dB  
PL1W 13.16228485 W  
SF01 300.1324010 MHz

F2 - Processing parameters

SI 32768  
SF 300.1300040 MHz  
WDW EM  
SSB 0  
LB 0.30 Hz  
GB 0  
PC 1.00

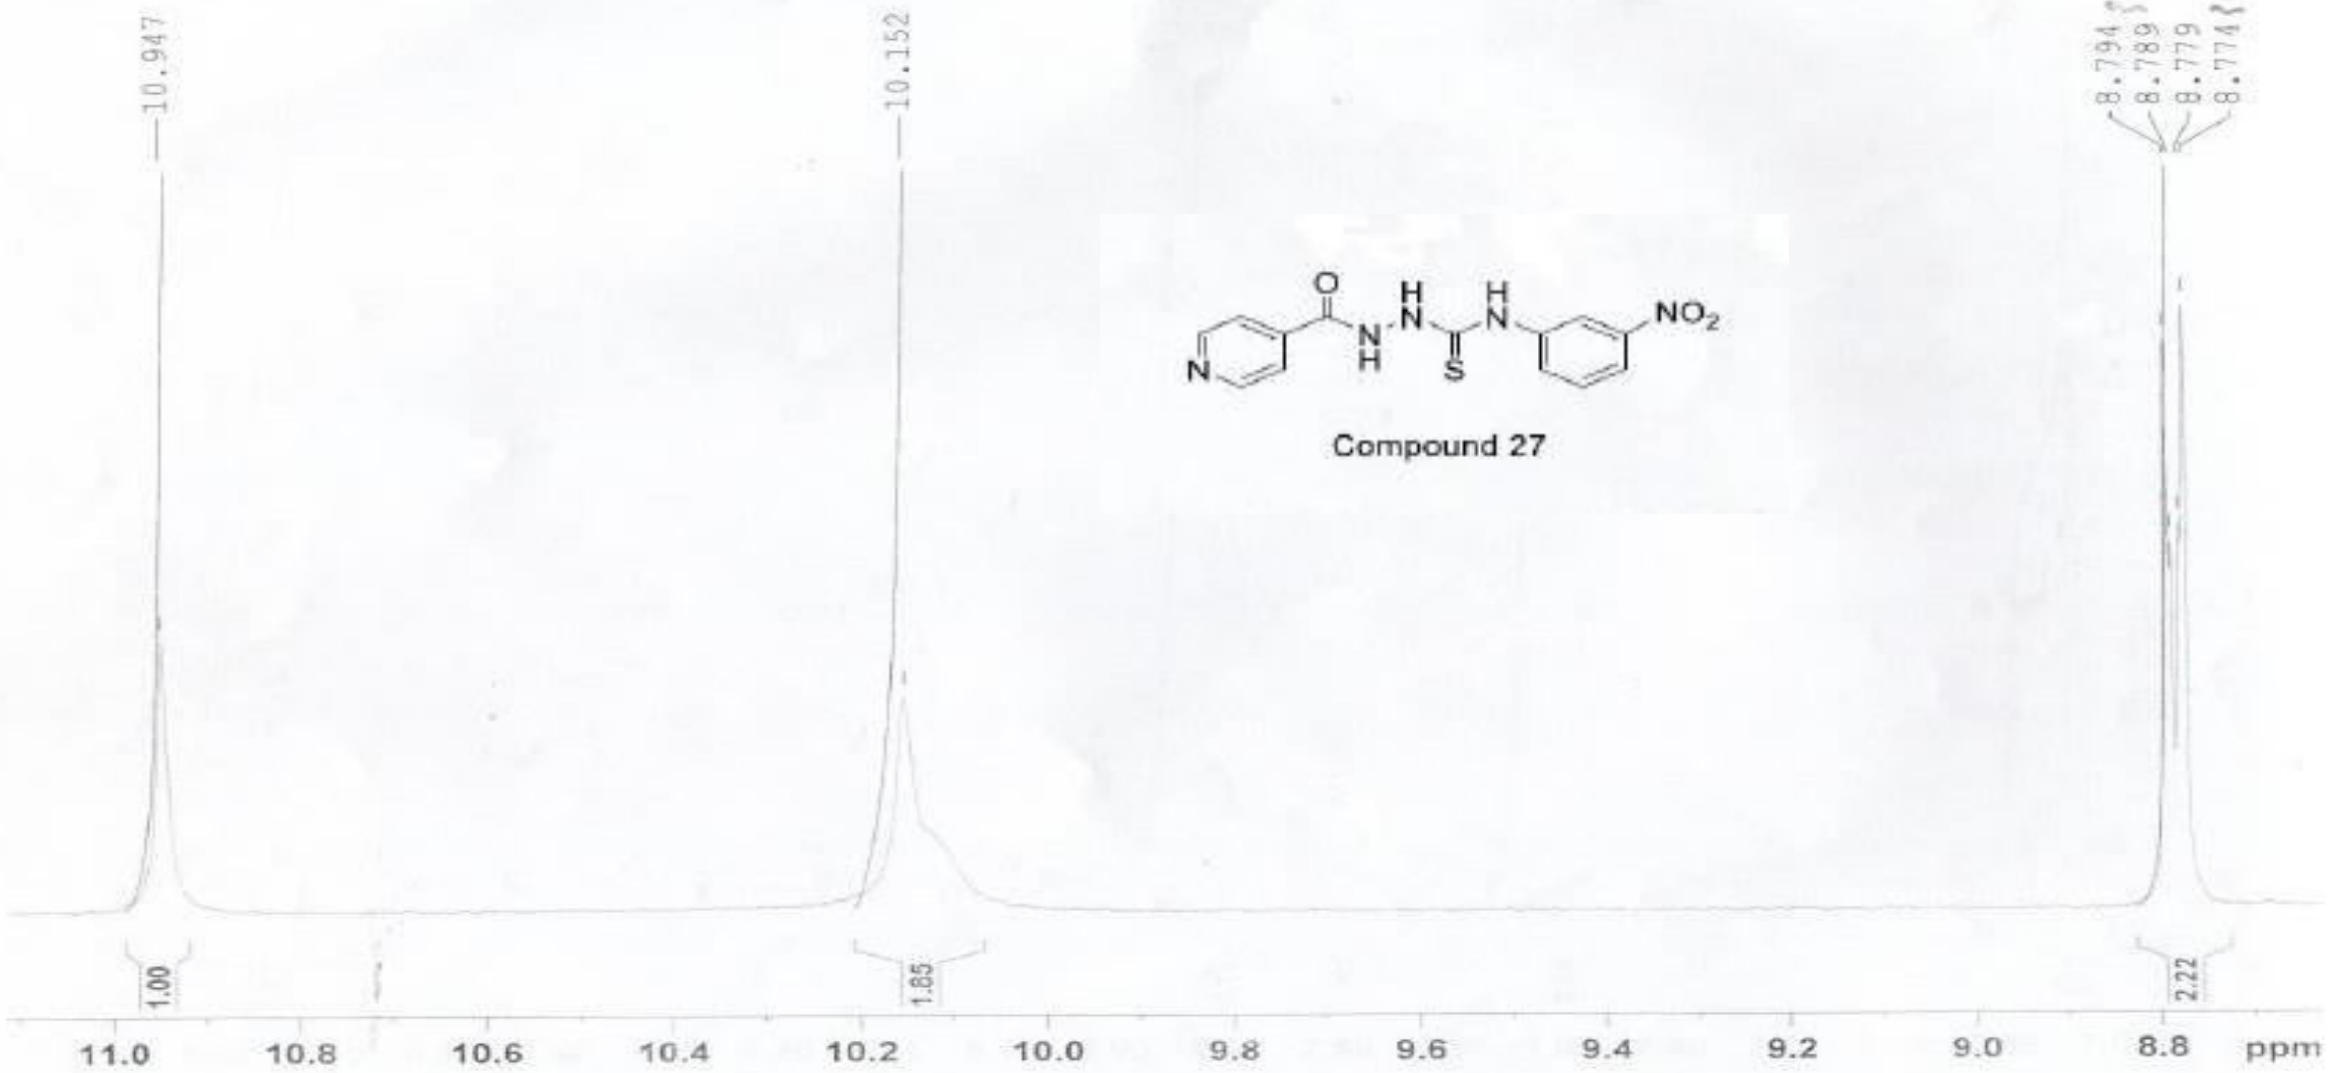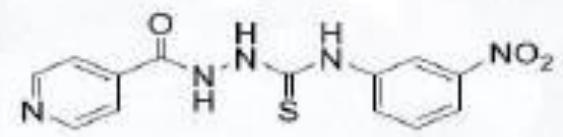

Compound 27

File: FZ-I-ISO33-FABN  
Sample: FAZILA /DR. HINA  
Instrument: JEOL-600H-2  
Inlet: Direct Probe

Date Run: 12-01-2016 (Time Run: 13:41:56)

Ionization mode: FAB-

Scan: 5

R.T.: .37

#Ions: 911

Base: m/z 183; 78.9%FS TIC: 2423426

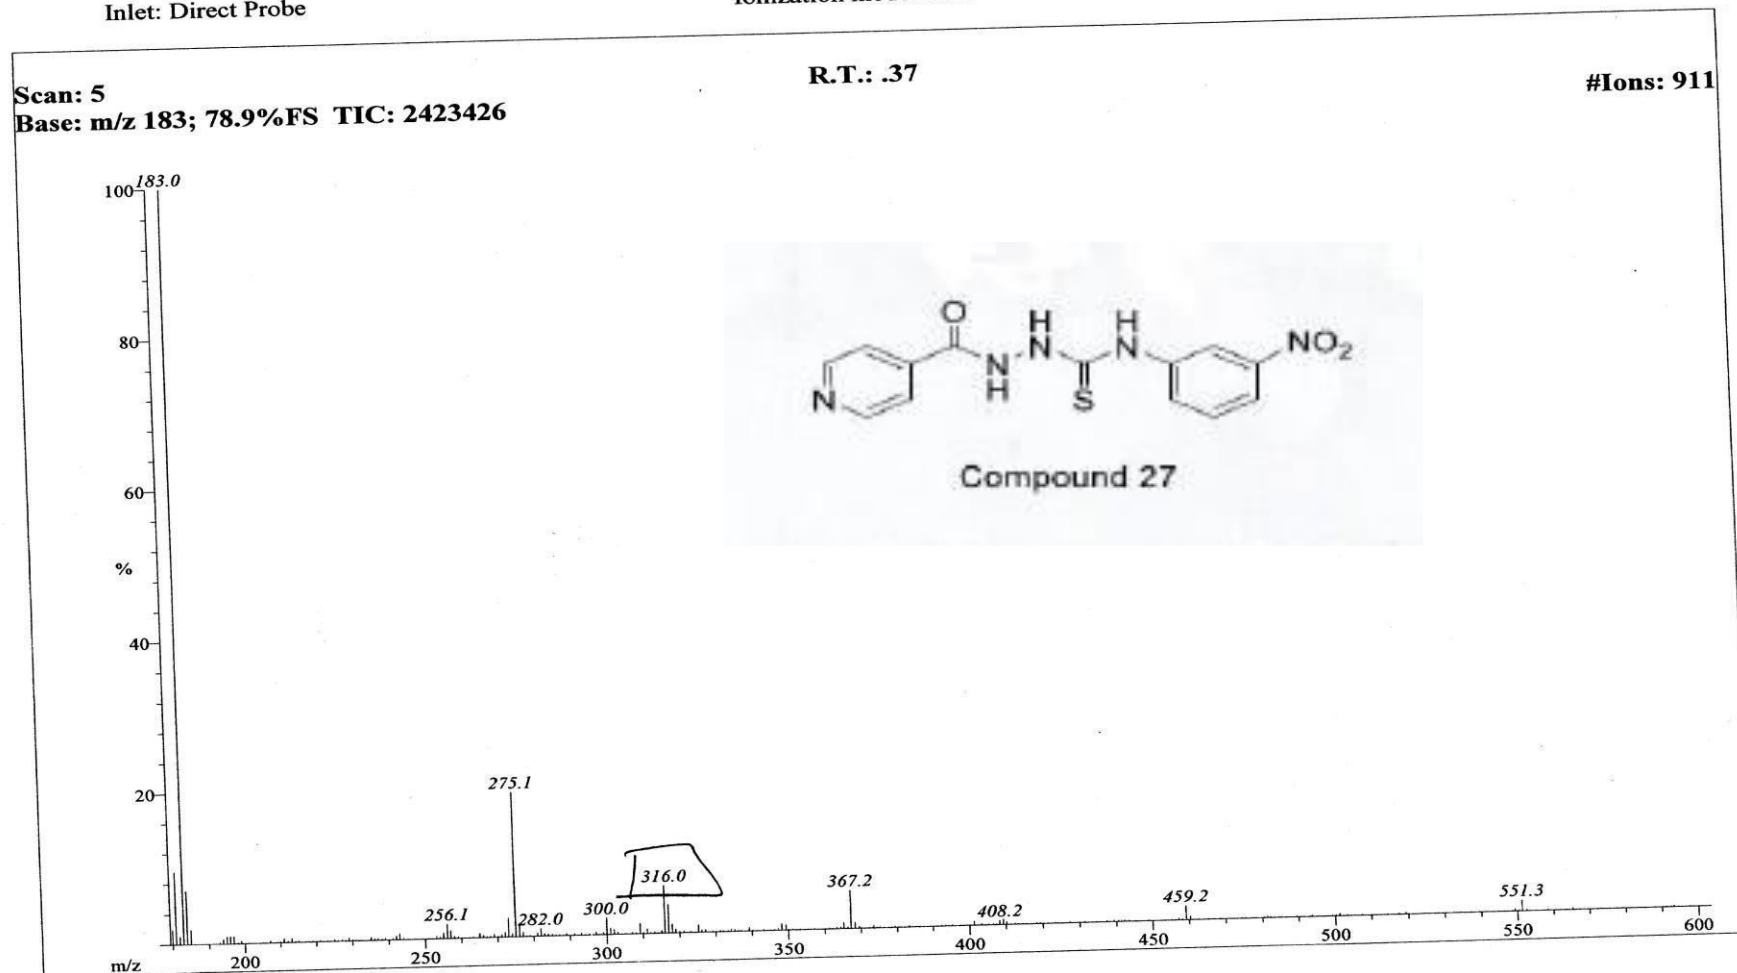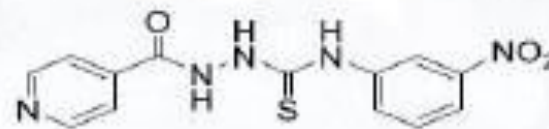

Compound 27

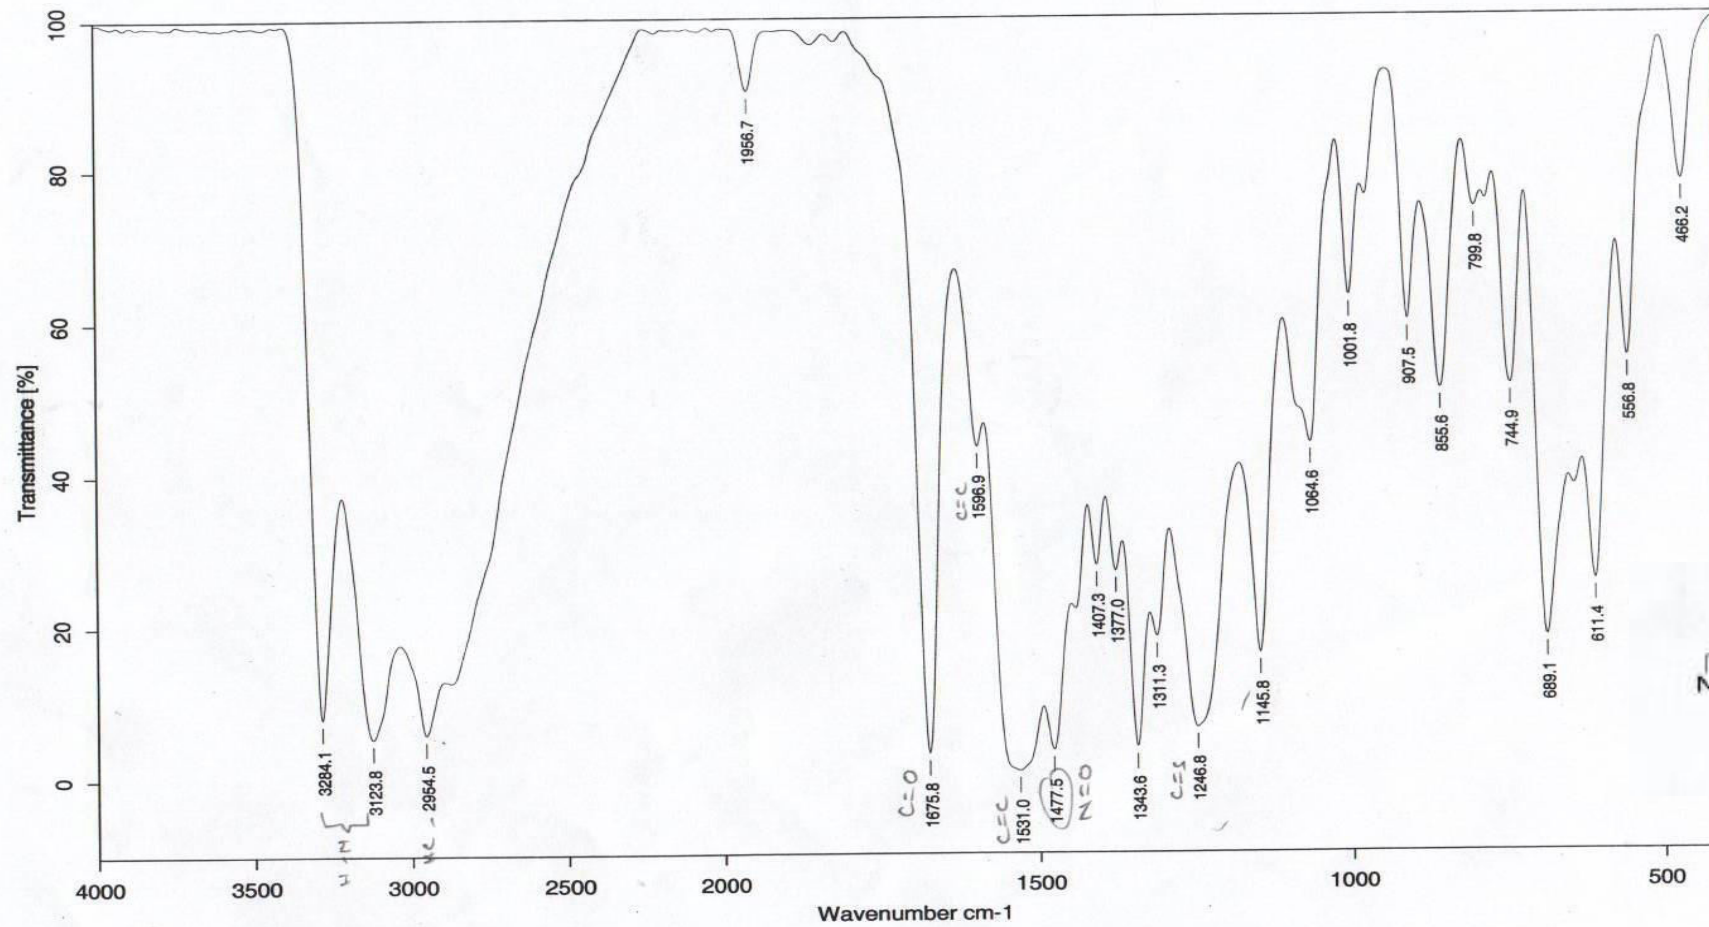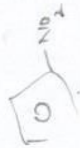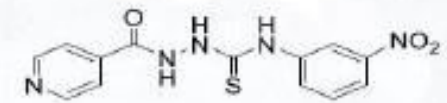

Compound 27

Sample : FZI-ISO33/Fazila Rizvi

Measured : 19/04/2017 on VECTOR22

Resolution : 4  $\text{cm}^{-1}$  ( 10 scans )

Spectrum : FZ-I-ISO33.0 ( in D:\IRSTUDENT )

Technic : Solid

Analyst : MA/ZA/JS
